# Supplementary material for: Antibacterial Indole Diketopiperazine Alkaloids from the Deep-Sea Cold Seep-Derived Fungus Aspergillus chevalieri
Source: MDPI journal article supplement (doi:10.3390/md21030195), 2023-03-22
Supplement: s1 [file s1]

# Supplementary Materials

## Antibacterial indole diketopiperazine alkaloids from the Deep-sea Cold Seep-Derived Fungus *Aspergillus chevalieri*

Li-Hong Yan <sup>1,2,3</sup>, Feng-Yu Du <sup>5</sup>, Xiao-Ming Li <sup>1,2,4</sup>, Sui-Qun Yang <sup>1,2,4</sup>, Bin-Gui Wang <sup>1,2,3,4,\*</sup> and Xin Li <sup>1,2,4,\*</sup>

<sup>1</sup> CAS and Shandong Province Key Laboratory of Experimental Marine Biology, Institute of Oceanology, Chinese Academy of Sciences, Nanhai Road 7, Qingdao 266071, China

<sup>2</sup> Laboratory of Marine Biology and Biotechnology, Qingdao National Laboratory for Marine Science and Technology, Wenhai Road 1, Qingdao 266237, China

<sup>3</sup> University of Chinese Academy of Sciences, Yuquan Road 19A, Beijing 100049, China

<sup>4</sup> Center for Ocean Mega-Science, Chinese Academy of Sciences, Nanhai Road 7, Qingdao 266071, China

<sup>5</sup> College of Chemistry and Pharmacy, Qingdao Agricultural University, Changcheng Road 700, Qingdao 266109, China

### Content

**Figure S1.** Chiral HPLC analysis of the acidic hydrolysate of compound 1;

**Figure S2.** <sup>1</sup>H NMR (500 MHz, DMSO-*d*<sub>6</sub>) spectrum of compound 1;

**Figure S3.** <sup>13</sup>C NMR (125 MHz, DMSO-*d*<sub>6</sub>) and DEPT spectra of compound 1;

**Figure S4.** COSY spectrum of compound 1;

**Figure S5.** HSQC spectrum of compound 1;

**Figure S6.** HMBC spectrum of compound 1;

**Figure S7.** HR-ESI-MS spectrum of compound 1;

**Figure S8.** ECD spectrum of compound 1;

**Figure S9.** Chiral HPLC analysis of the acidic hydrolysate of compound 2;

**Figure S10.** <sup>1</sup>H NMR (500 MHz, DMSO-*d*<sub>6</sub>) spectrum of compound 2;

**Figure S11.** <sup>13</sup>C NMR (125 MHz, DMSO-*d*<sub>6</sub>) and DEPT spectra of compound 2;

**Figure S12.** COSY spectrum of compound 2;

**Figure S13.** HSQC spectrum of compound 2;

**Figure S14.** HMBC spectrum of compound **2**;

**Figure S15.** NOESY spectrum of compound **2**;

**Figure S16.** HR-ESI-MS spectrum of compound **2**;

**Figure S17.** ECD spectrum of compound **2**;

**Figure S18.** Structures of four possible isomers for DP4+ probability analysis of compound **2**;

**Figure S19.** Optimized geometries of predominant conformers (weighting factors) for isomer **2a** at the B3LYP/6-31+g(d,p) level. A total of 152 conformers were searched and 8 of them possess Boltzmann distributions over 2%.

**Figure S20.** Optimized geometries of predominant conformers (weighting factors) for isomer **2b** at the B3LYP/6-31+g(d,p) level. A total of 132 conformers were searched and 7 of them possess Boltzmann distributions over 2%.

**Figure S21.** Optimized geometries of predominant conformers (weighting factors) for isomer **2c** at the B3LYP/6-31+g(d,p) level. A total of 178 conformers were searched and 8 of them possess Boltzmann distributions over 2%.

**Figure S22.** Optimized geometries of predominant conformers (weighting factors) for isomer **2d** at the B3LYP/6-31+g(d,p) level. A total of 177 conformers were searched and 7 of them possess Boltzmann distributions over 2%.

**Figure S23.** Chiral HPLC analysis of the acidic hydrolysate of compound **3**;

**Figure S24.** <sup>1</sup>H NMR (500 MHz, DMSO-*d*<sub>6</sub>) spectrum of compound **3**;

**Figure S25.** <sup>13</sup>C NMR (125 MHz, DMSO-*d*<sub>6</sub>) and DEPT spectra of compound **3**;

**Figure S26.** COSY spectrum of compound **3**;

**Figure S27.** HSQC spectrum of compound **3**;

**Figure S28.** HMBC spectrum of compound **3**;

**Figure S29.** NOESY spectrum of compound **3**;

**Figure S30.** HR-ESI-MS spectrum of compound **3**;

**Figure S31.** ECD spectrum of compound **3**;

**Figure S32.** Structures of four possible isomers for DP4+ probability analysis of compound **3**;

**Figure S33.** Optimized geometries of predominant conformers (weighting factors) for isomer **3a** at the B3LYP/6-31+g(d,p) level. A total of 155 conformers were searched and 6 of them possess Boltzmann distributions over 2%.

**Figure S34.** Optimized geometries of predominant conformers (weighting factors) for isomer **3b** at the B3LYP/6-31+g(d,p) level. A total of 168 conformers were searched and 8 of them possess Boltzmann distributions over 2%.

**Figure S35.** Optimized geometries of predominant conformers (weighting factors) for isomer **3c** at the B3LYP/6-31+g(d,p) level. A total of 176 conformers were searched and 8 of them possess Boltzmann distributions over 2%.

**Figure S36.** Optimized geometries of predominant conformers (weighting factors) for isomer **3d** at the B3LYP/6-31+g(d,p) level. A total of 146 conformers were searched and 8 of them possess Boltzmann distributions over 2%.

**Figure S37.** Chiral HPLC analysis of the acidic hydrolysate of compound **4**;

**Figure S38.**  $^1\text{H}$  NMR (500 MHz,  $\text{DMSO-}d_6$ ) spectrum of compound **4**;

**Figure S39.**  $^{13}\text{C}$  NMR (125 MHz,  $\text{DMSO-}d_6$ ) and DEPT spectra of compound **4**;

**Figure S40.** COSY spectrum of compound **4**;

**Figure S41.** HSQC spectrum of compound **4**;

**Figure S42.** HMBC spectrum of compound **4**;

**Figure S43.** NOESY spectrum of compound **4**;

**Figure S44.** HR-ESI-MS spectrum of compound **4**;

**Figure S45.** ECD spectrum of compound **4**;

**Figure S46.** Structures of four possible isomers for DP4+ probability analysis of compound **4**;

**Figure S47.** Optimized geometries of predominant conformers (weighting factors) for isomer **4a** at the B3LYP/6-31+g(d,p) level. A total of 270 conformers were searched and 7 of them possess Boltzmann distributions over 2%.

**Figure S48.** Optimized geometries of predominant conformers (weighting factors) for isomer **4b** at the B3LYP/6-31+g(d,p) level. A total of 349 conformers were searched and 4 of them possess Boltzmann distributions over 2%.

**Figure S49.** Optimized geometries of predominant conformers (weighting factors) for isomer **4c** at the B3LYP/6-31+g(d,p) level. A total of 327 conformers were searched and 6 of them possess Boltzmann distributions over 2%.

**Figure S50.** Optimized geometries of predominant conformers (weighting factors) for isomer **4d** at the B3LYP/6-31+g(d,p) level. A total of 281 conformers were searched and 6 of them possess

Boltzmann distributions over 2%.

**Figure S51.** Chiral HPLC analysis of the acidic hydrolysate of compound **5**;

**Figure S52.**  $^1\text{H}$  NMR (500 MHz,  $\text{DMSO-}d_6$ ) spectrum of compound **5**;

**Figure S53.**  $^{13}\text{C}$  NMR (125 MHz,  $\text{DMSO-}d_6$ ) and DEPT spectra of compound **5**;

**Figure S54.** COSY spectrum of compound **5**;

**Figure S55.** HSQC spectrum of compound **5**;

**Figure S56.** HMBC spectrum of compound **5**;

**Figure S57.** NOESY spectrum of compound **5**;

**Figure S58.** HR-ESI-MS spectrum of compound **5**;

**Figure S59.** ECD spectrum of compound **5**;

**Figure S60.**  $^1\text{H}$  NMR (500 MHz,  $\text{DMSO-}d_6$ ) spectrum ( $\delta_{\text{H}}$  range from 0.8 to 2.0 ppm) of compound **7** compared with **4**;

**Figure S61.**  $^1\text{H}$  NMR (500 MHz,  $\text{DMSO-}d_6$ ) spectrum ( $\delta_{\text{H}}$  range from 2.5 to 4.5 ppm) of compound **7** compared with **4**;

**Figure S62.**  $^{13}\text{C}$  NMR (125 MHz,  $\text{DMSO-}d_6$ ) spectrum ( $\delta_{\text{C}}$  range from 15.0 to 33.0 ppm) of compound **7** compared with **4**;

**Figure S63.** Enlarged HMBC spectrum of compound **7**;

**Figure S64.** Enlarged NOESY spectrum of compound **7**;

**Figure S65.**  $^1\text{H}$  NMR (500 MHz,  $\text{DMSO-}d_6$ ) spectrum of compound **7**;

**Figure S66.**  $^{13}\text{C}$  NMR (125 MHz,  $\text{DMSO-}d_6$ ) spectrum of compound **7**;

**Figure S67.** HSQC spectrum of compound **7**;

**Figure S68.** HMBC spectrum of compound **7**;

**Figure S69.** NOESY spectrum of compound **7**;

**Table S1.** DP4+ probability analysis of compound **2** (mPW1PW91/6-31+G(d, p) level);

**Table S2.** DP4+ probability analysis of compound **3** (mPW1PW91/6-31+G(d, p) level);

**Table S3.** DP4+ probability analysis of compound **4** (mPW1PW91/6-31+G(d, p) level);

**Table S4.** The calculated shielding tensors of each conformer (>2%) for isomer **2a**;

**Table S5.** The calculated shielding tensors of each conformer (>2%) for isomer **2b**;

**Table S6.** The calculated shielding tensors of each conformer (>2%) for isomer **2c**;

**Table S7.** The calculated shielding tensors of each conformer (>2%) for isomer **2d**;

**Table S8.** The calculated shielding tensors of each conformer (>2%) for isomer **3a**;

**Table S9.** The calculated shielding tensors of each conformer (>2%) for isomer **3b**;

**Table S10.** The calculated shielding tensors of each conformer (>2%) for isomer **3c**;

**Table S11.** The calculated shielding tensors of each conformer (>2%) for isomer **3d**;

**Table S12.** The calculated shielding tensors of each conformer (>2%) for isomer **4a**;

**Table S13.** The calculated shielding tensors of each conformer (>2%) for isomer **4b**;

**Table S14.** The calculated shielding tensors of each conformer (>2%) for isomer **4c**;

**Table S15.** The calculated shielding tensors of each conformer (>2%) for isomer **4d**;

**Table S17.** The Cartesian coordinates of the lowest energy conformers (Conf. 1-8) for isomer **2a**;

**Table S17.** The Cartesian coordinates of the lowest energy conformers (Conf. 1-7) for isomer **2b**;

**Table S18.** The Cartesian coordinates of the lowest energy conformers (Conf. 1-8) for isomer **2c**;

**Table S19.** The Cartesian coordinates of the lowest energy conformers (Conf. 1-7) for isomer **2d**;

**Table S20.** The Cartesian coordinates of the lowest energy conformers (Conf. 1-6) for isomer **3a**;

**Table S21.** The Cartesian coordinates of the lowest energy conformers (Conf. 1-8) for isomer **3b**;

**Table S22.** The Cartesian coordinates of the lowest energy conformers (Conf. 1-8) for isomer **3c**;

**Table S23.** The Cartesian coordinates of the lowest energy conformers (Conf. 1-8) for isomer **3d**;

**Table S24.** The Cartesian coordinates of the lowest energy conformers (Conf. 1-7) for isomer **4a**;

**Table S25.** The Cartesian coordinates of the lowest energy conformers (Conf. 1-4) for isomer **4b**;

**Table S26.** The Cartesian coordinates of the lowest energy conformers (Conf. 1-6) for isomer **4c**;

**Table S27.** The Cartesian coordinates of the lowest energy conformers (Conf. 1-6) for isomer **4d**.

**Figure S1.** Chiral HPLC analysis of the acidic hydrolysate of compound **1**.

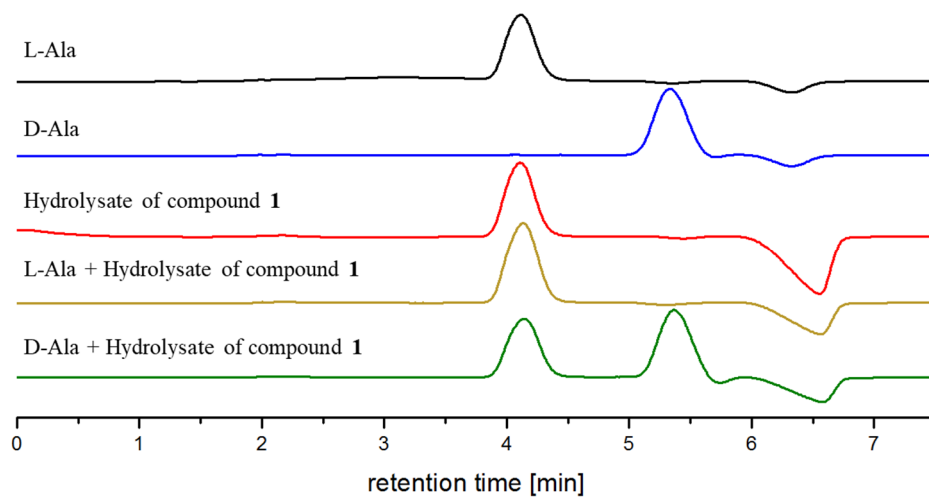

**Figure S2.**  $^1\text{H}$  NMR (500 MHz,  $\text{DMSO}-d_6$ ) spectrum of compound **1**.

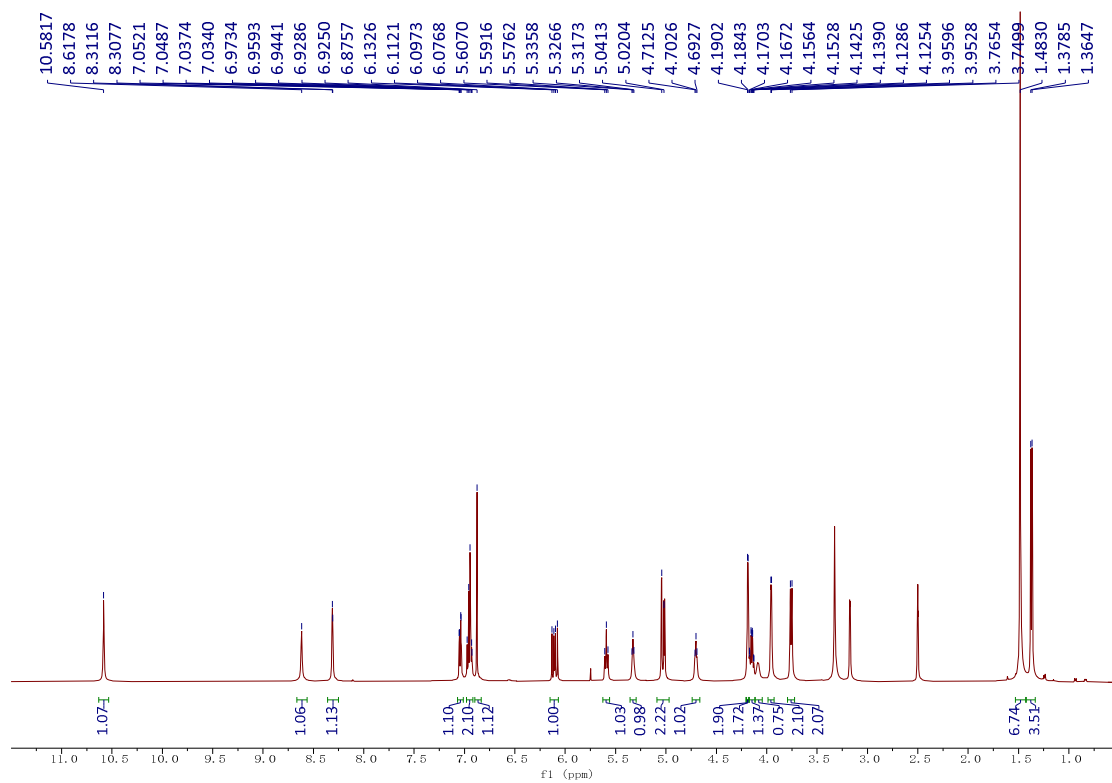

**Figure S3.**  $^{13}\text{C}$  NMR (125 MHz,  $\text{DMSO-}d_6$ ) and DEPT spectra of compound **1**.

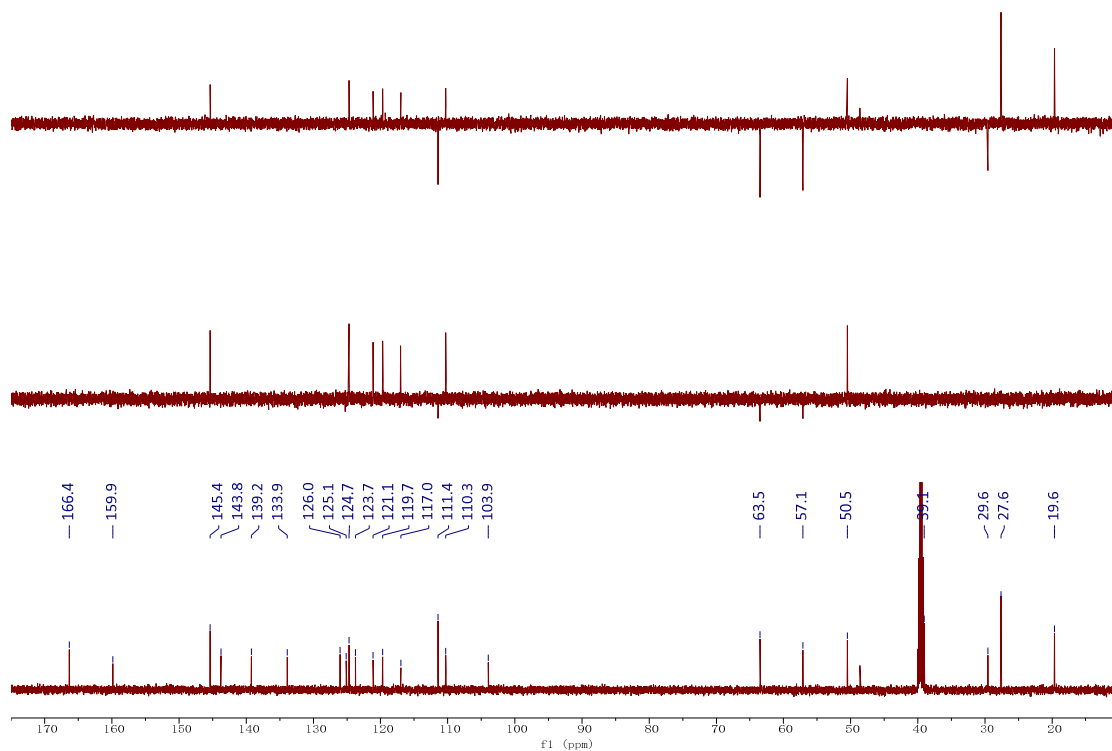

**Figure S4.** COSY spectrum of compound **1**.

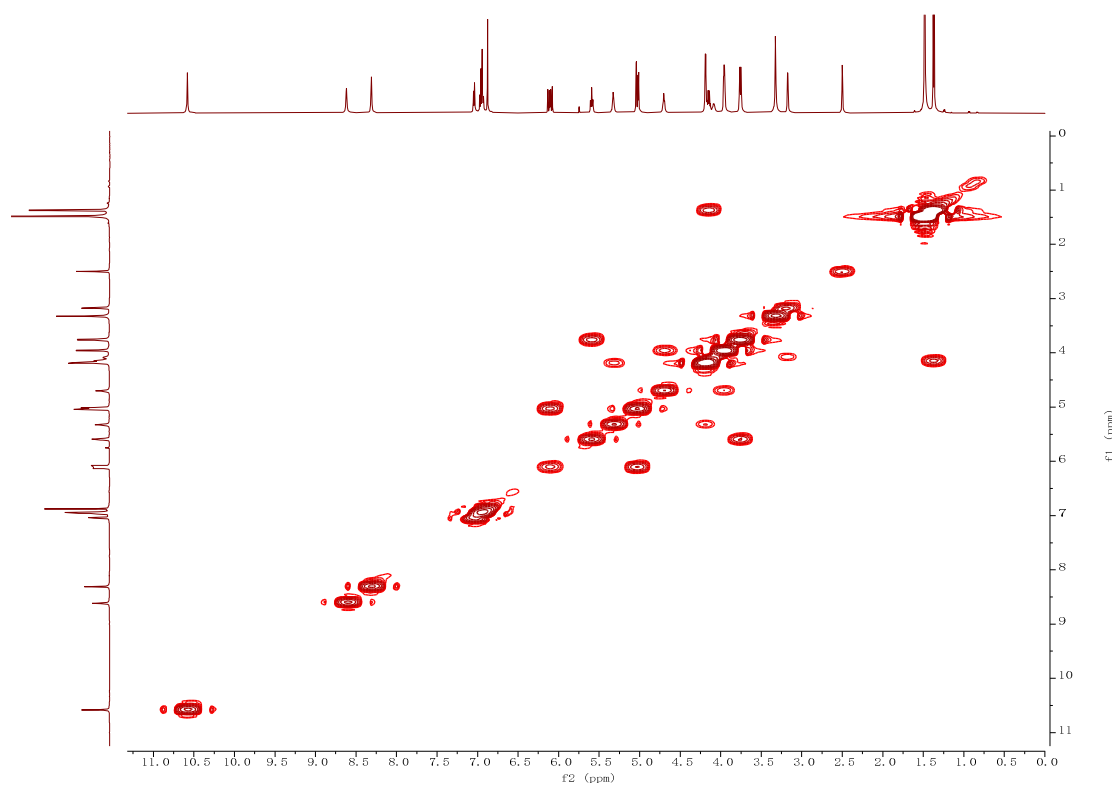

**Figure S5.** HSQC spectrum of compound **1**.

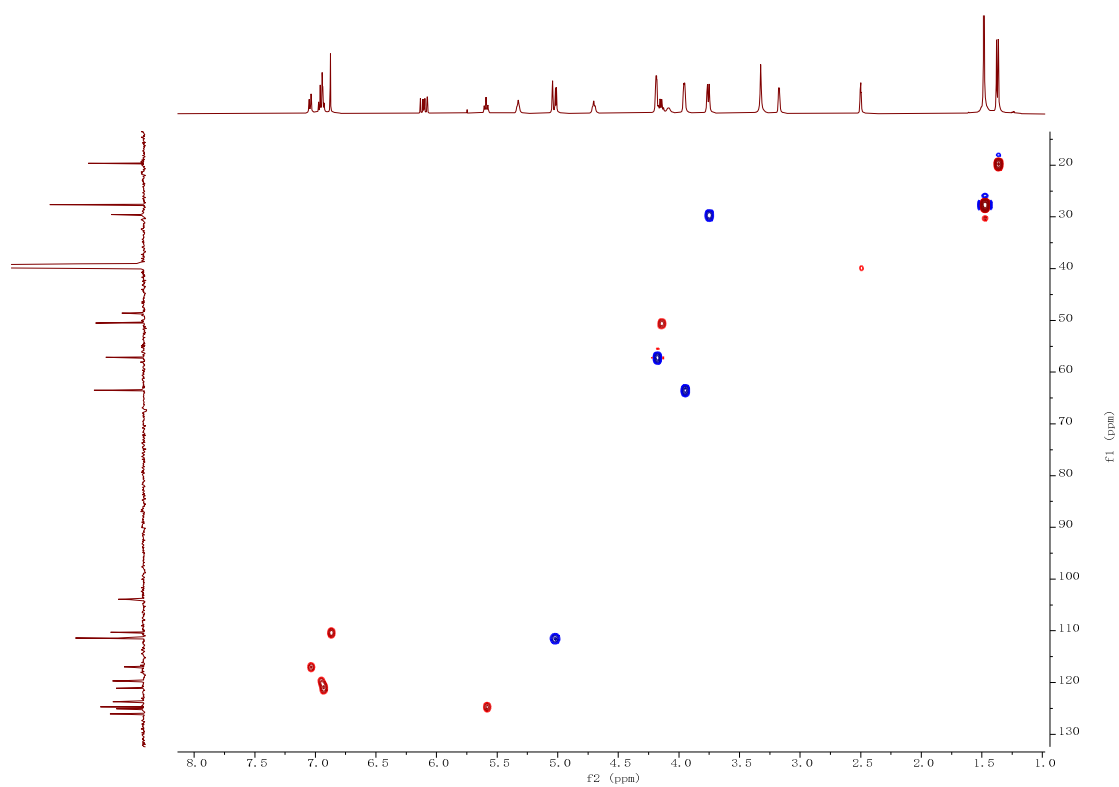

**Figure S6.** HMBC spectrum of compound **1**.

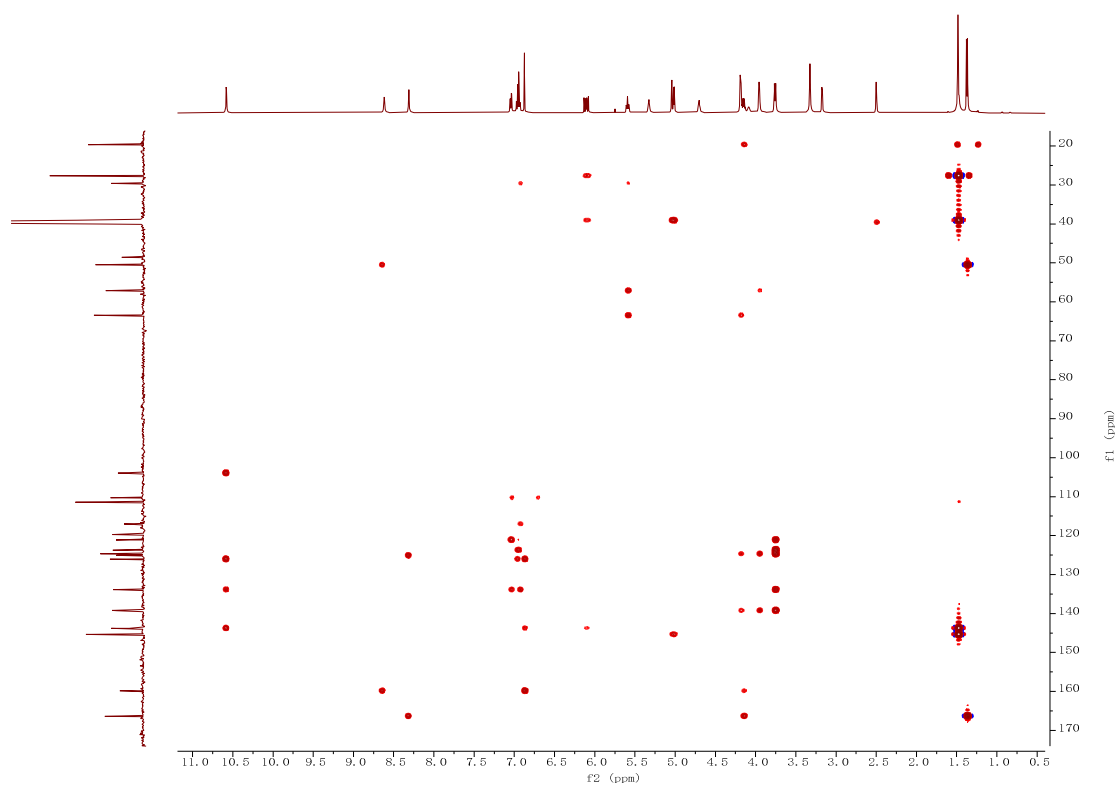



**Figure S7.** HR-ESI-MS spectrum of compound 1.

20200928-CS122-39\_200928145435 #62-63 RT: 0.57-0.58 AV: 2 NL: 9.64E6  
T: FTMS + p ESI Full ms [120.00-1000.00]

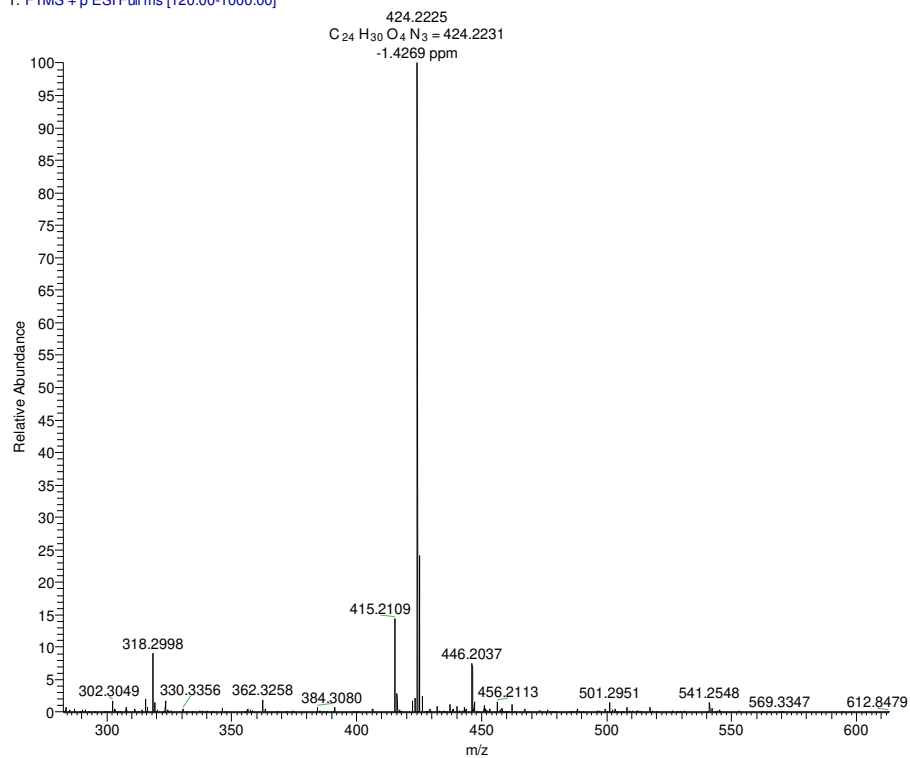

**Figure S8.** ECD spectrum of compound 1.

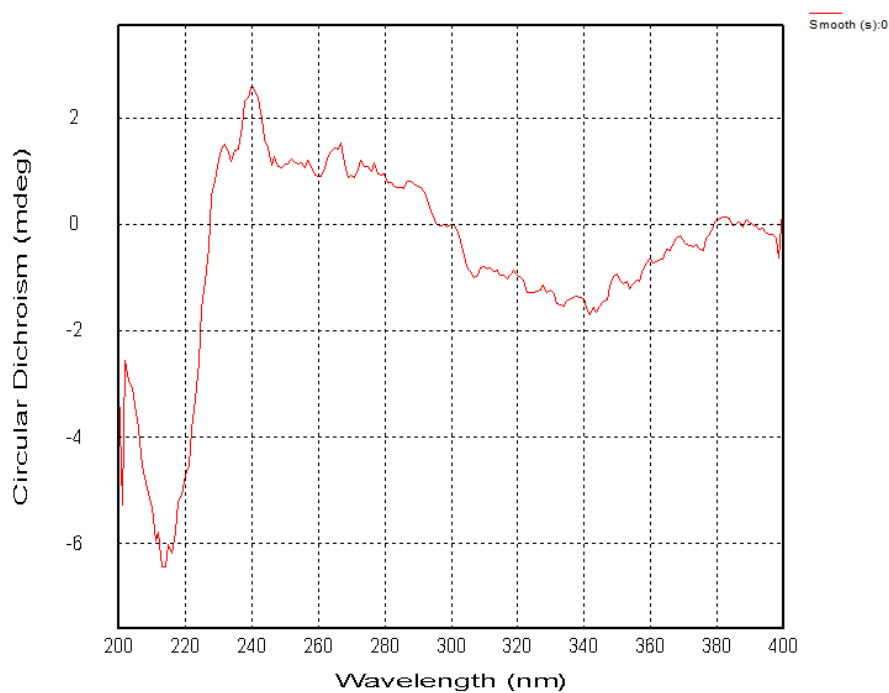

**Figure S9.** Chiral HPLC analysis of the acidic hydrolysate of compound **2**.

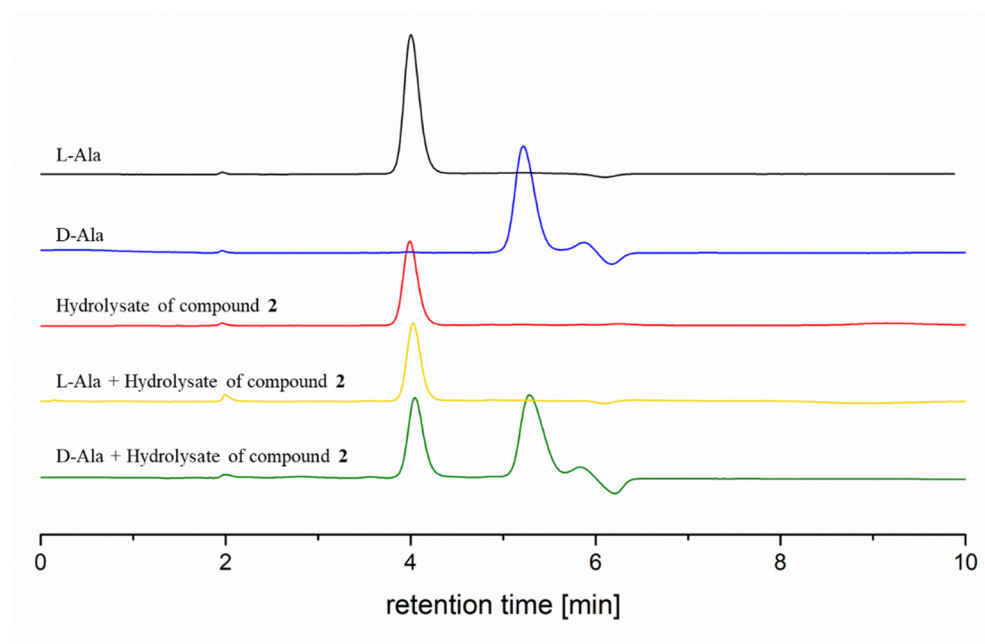

**Figure S10.**  $^1\text{H}$  NMR (500 MHz,  $\text{DMSO}-d_6$ ) spectrum of compound **2**.

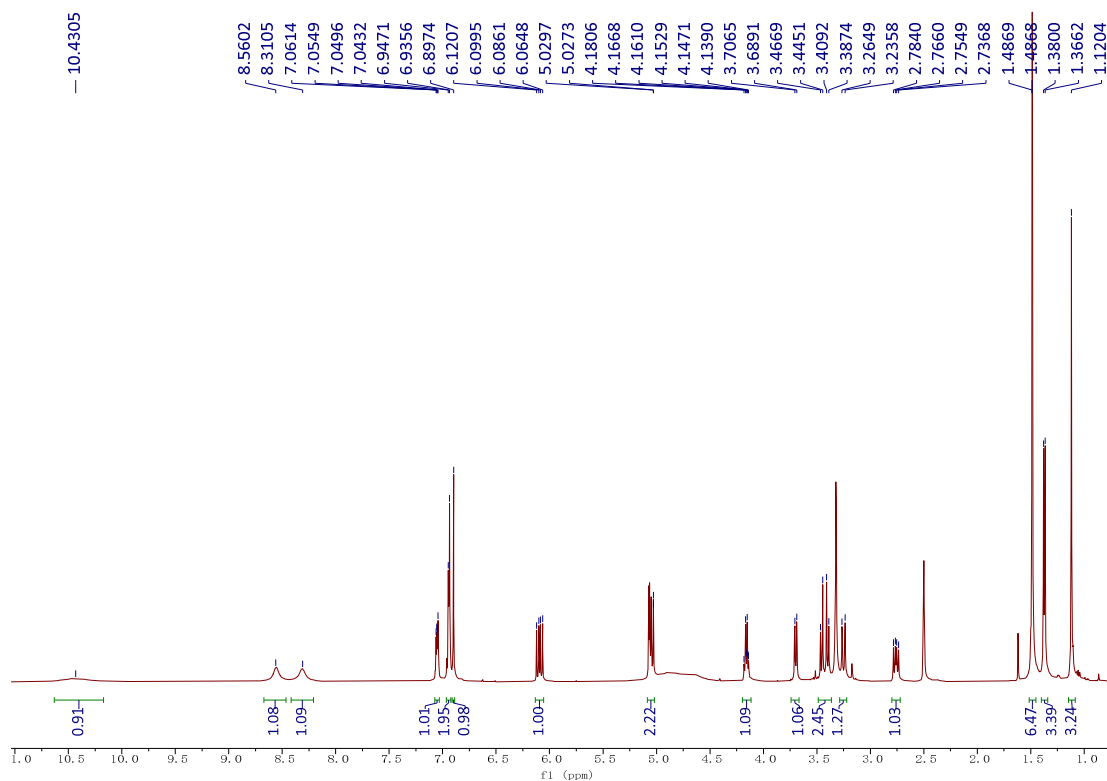

**Figure S11.**  $^{13}\text{C}$  NMR (125 MHz,  $\text{DMSO-}d_6$ ) and DEPT spectra of compound **2**.

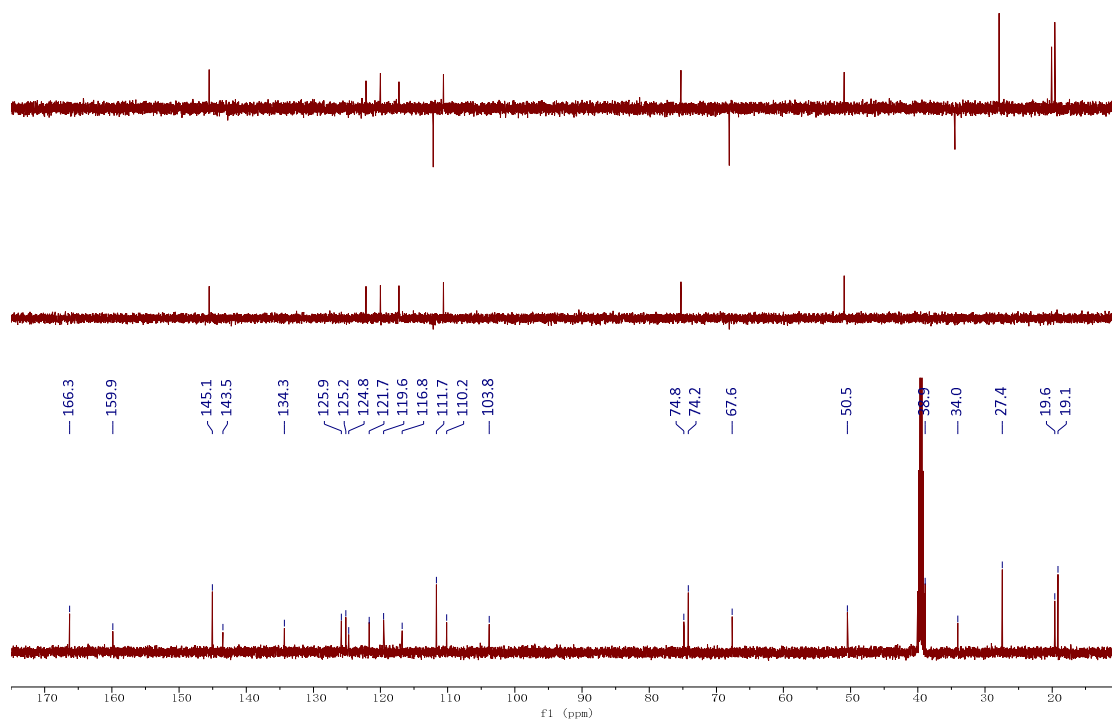

**Figure S12.** COSY spectrum of compound **2**.

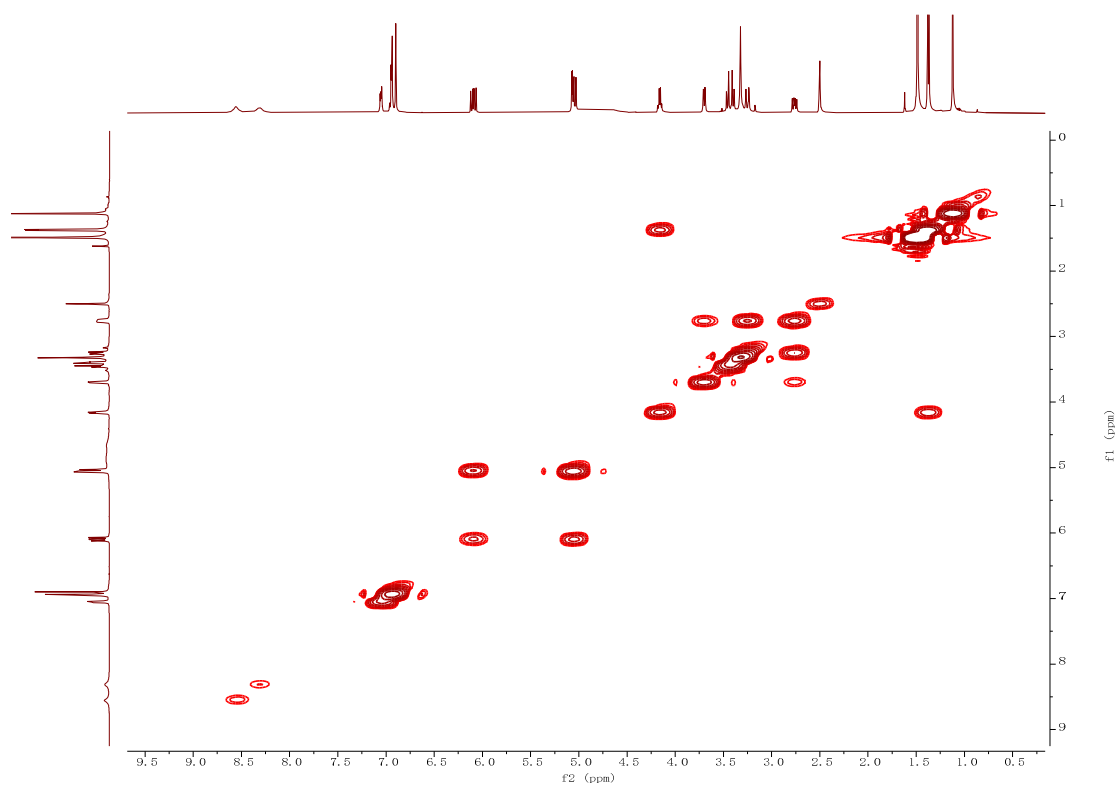

**Figure S13.** HSQC spectrum of compound **2**.

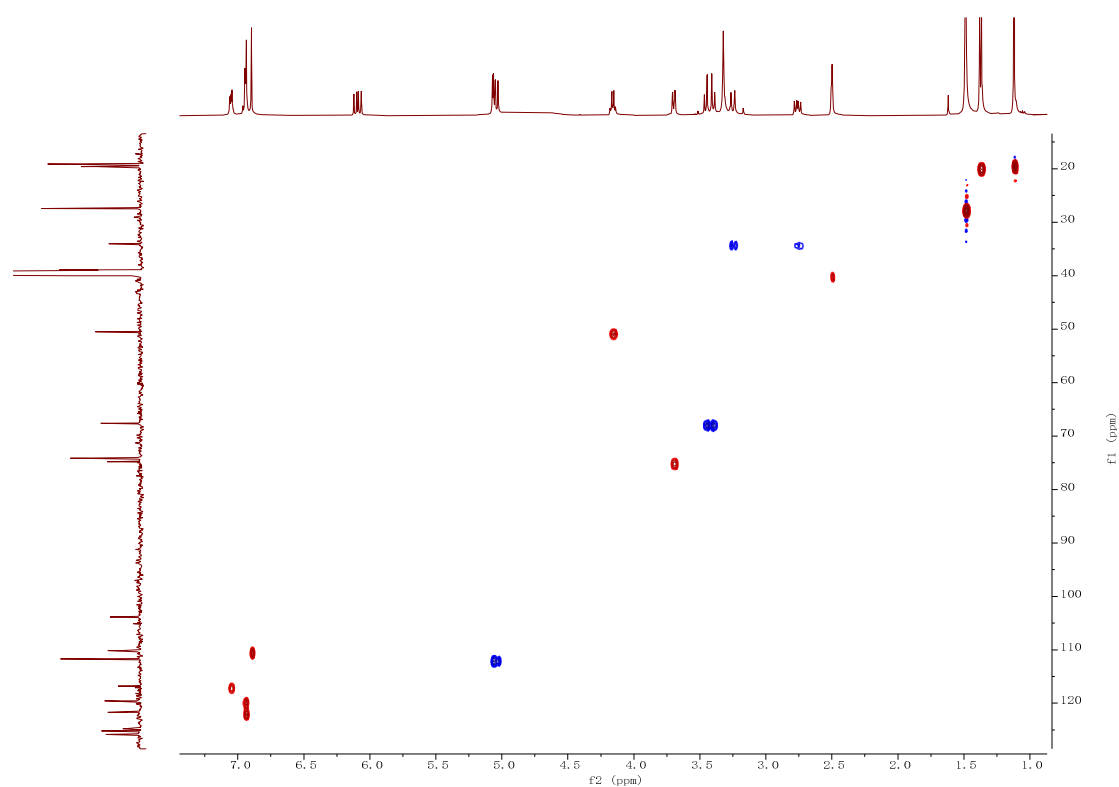

**Figure S14.** HMBC spectrum of compound **2**.

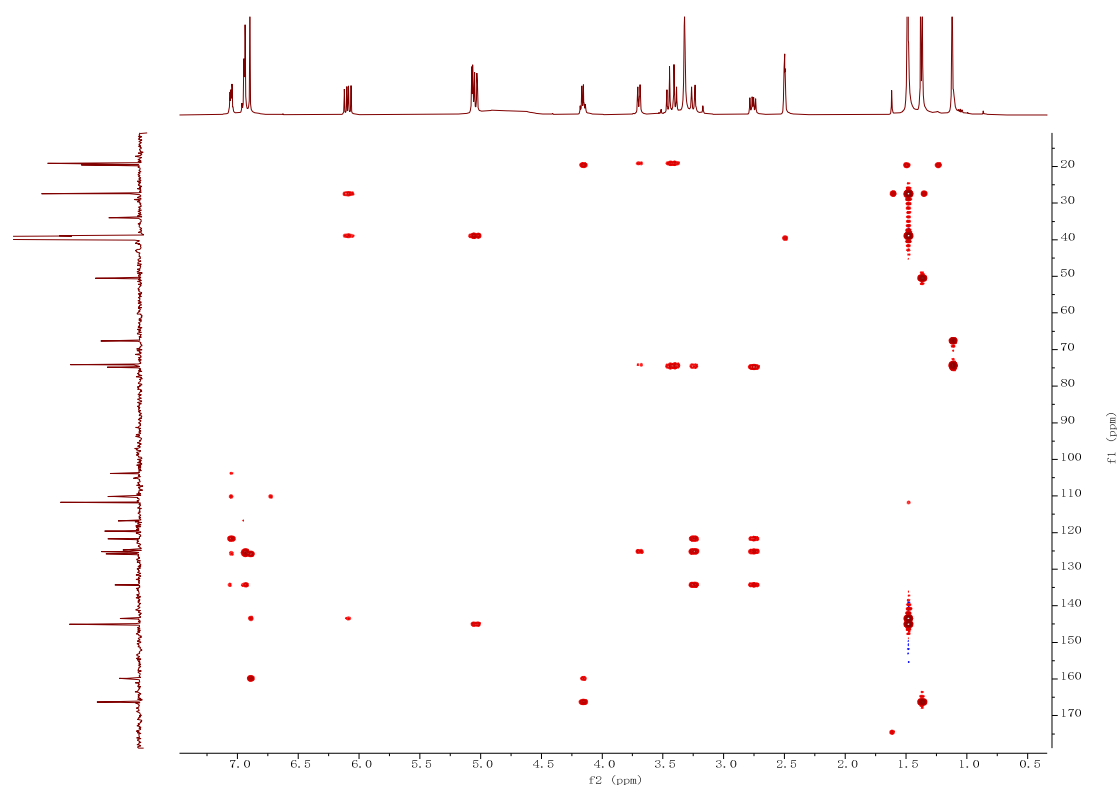

**Figure S15.** NOESY spectrum of compound **2**.

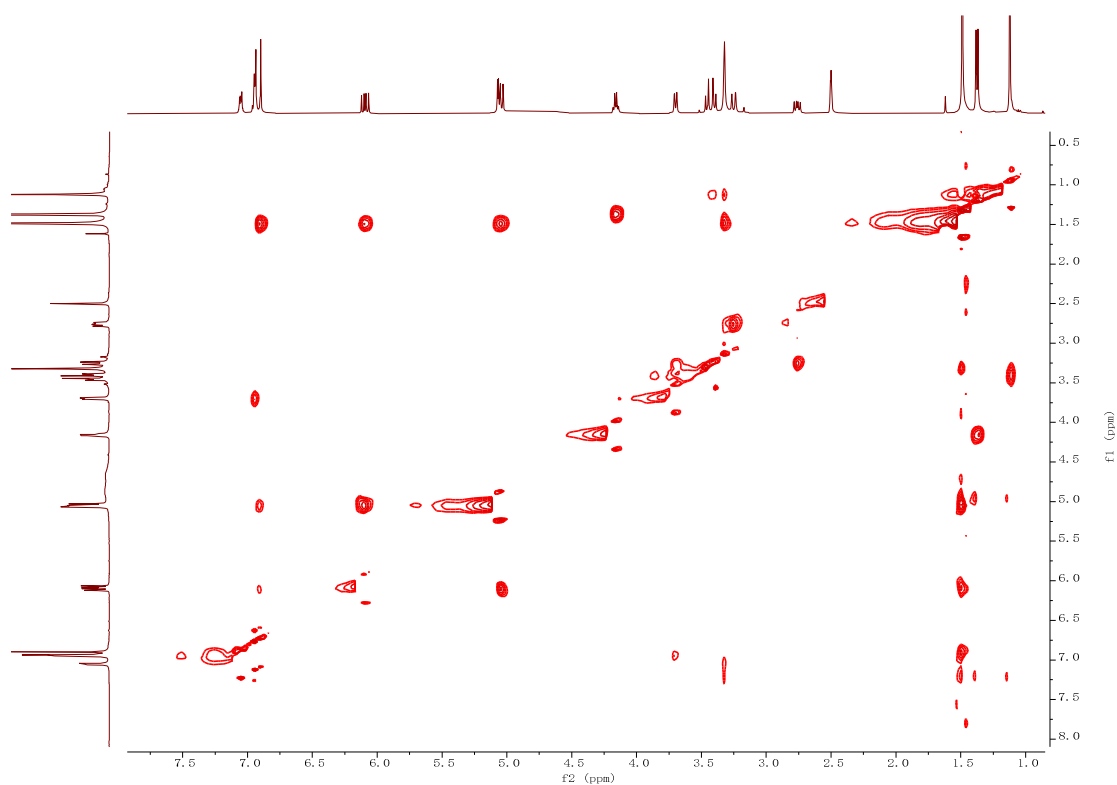

**Figure S16.** HR-ESI-MS spectrum of compound **2**.

20200928-CS122-42\_200925143458 #73-74 RT: 0.65-0.66 AV: 2 NL: 5.92E6  
T: FTMS + p ESI Full ms [120.00-1000.00]

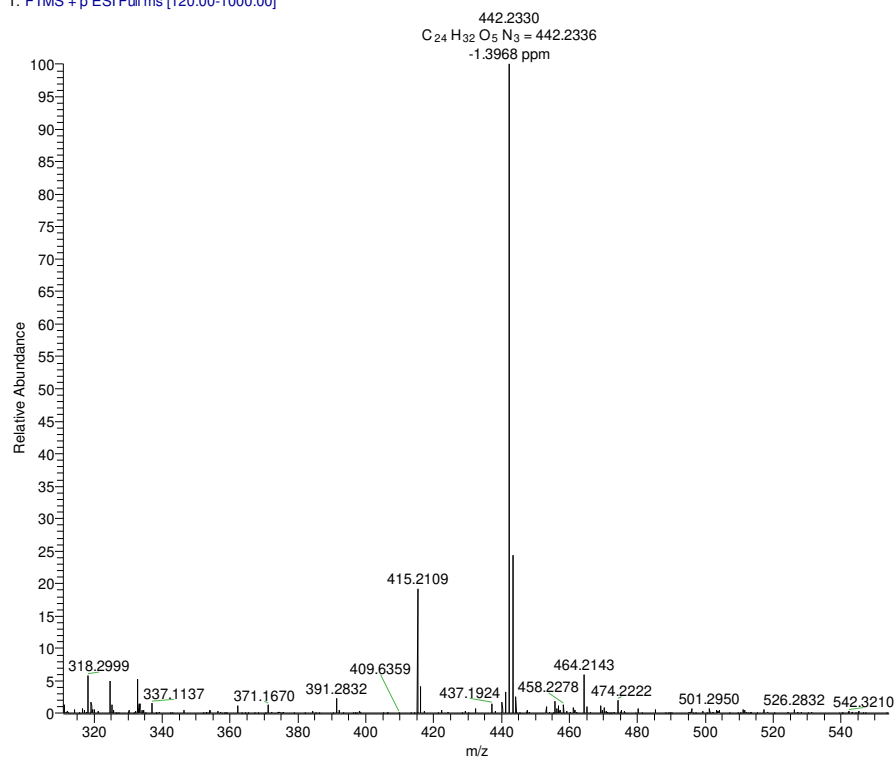

**Figure S17.** ECD spectrum of compound **2**.

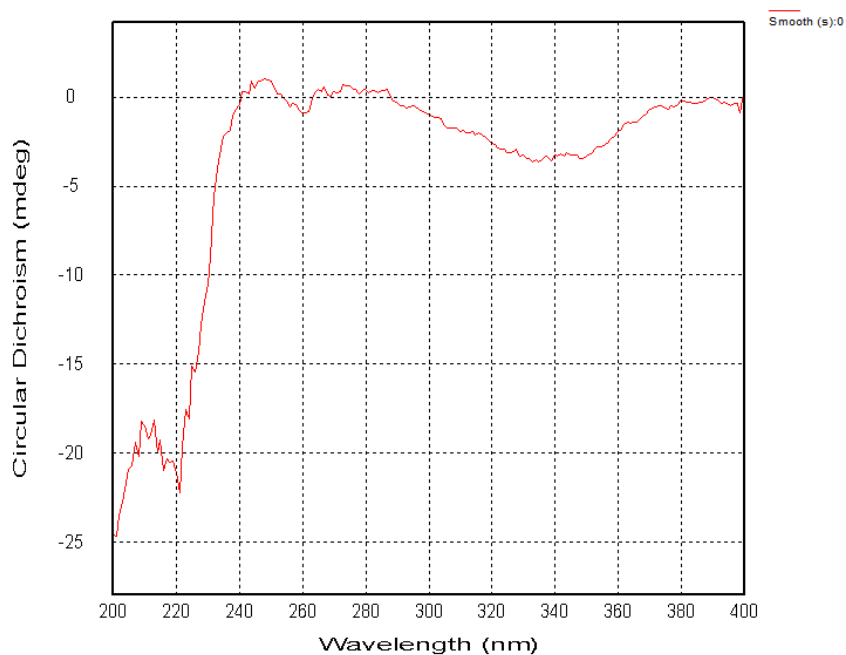

**Figure S18.** Structures of four possible isomers for DP4+ probability analysis of compound **2**.

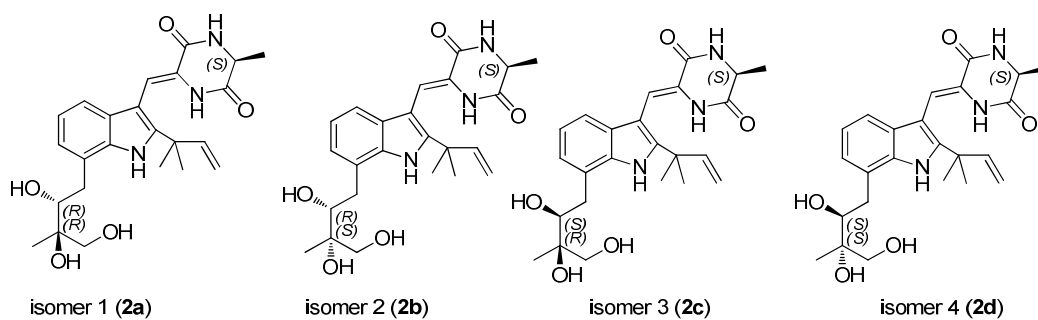

**Figure S19.** Optimized geometries of predominant conformers (weighting factors) for isomer **2a** at the B3LYP/6-31+g(d,p) level. A total of 152 conformers were searched and 8 of them possess Boltzmann distributions over 2%.

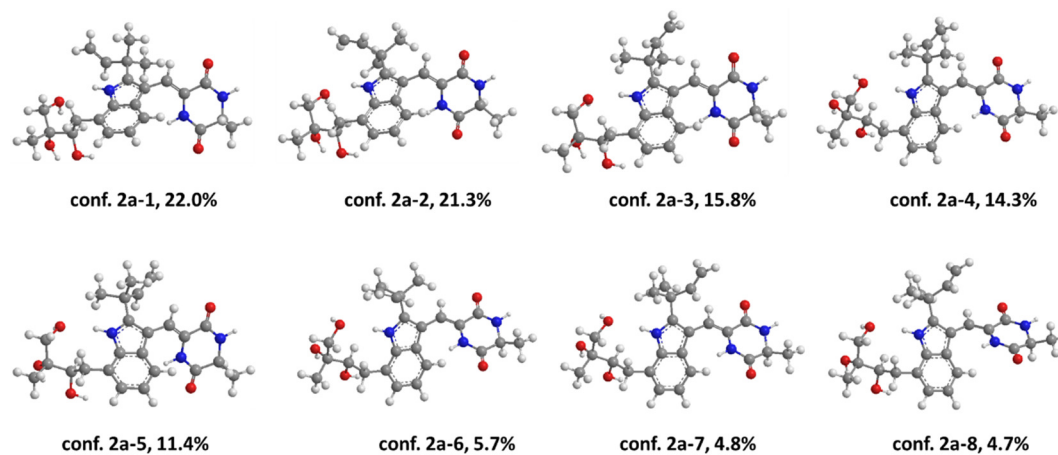

**Figure S20.** Optimized geometries of predominant conformers (weighting factors) for isomer **2b** at the B3LYP/6-31+g(d,p) level. A total of 132 conformers were searched and 7 of them possess Boltzmann distributions over 2%.

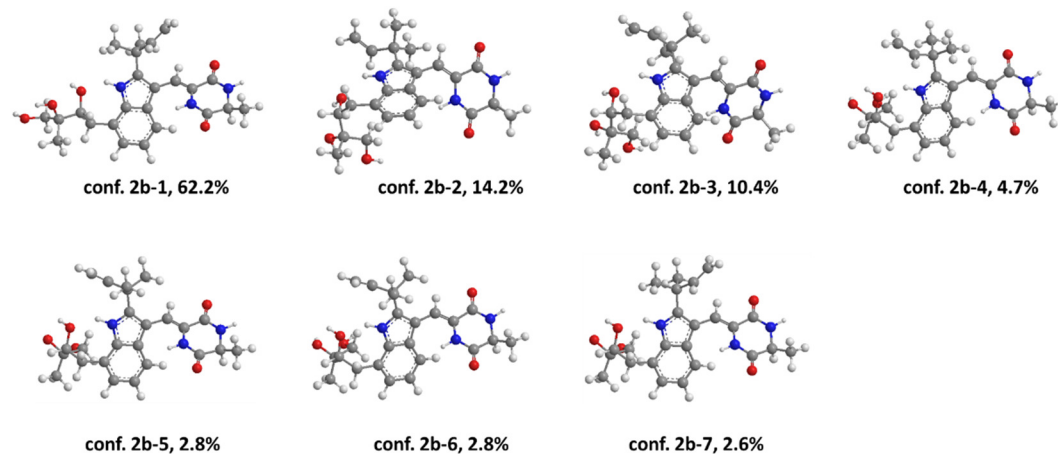

**Figure S21.** Optimized geometries of predominant conformers (weighting factors) for isomer **2c** at the B3LYP/6-31+g(d,p) level. A total of 178 conformers were searched and 8 of them possess Boltzmann distributions over 2%.

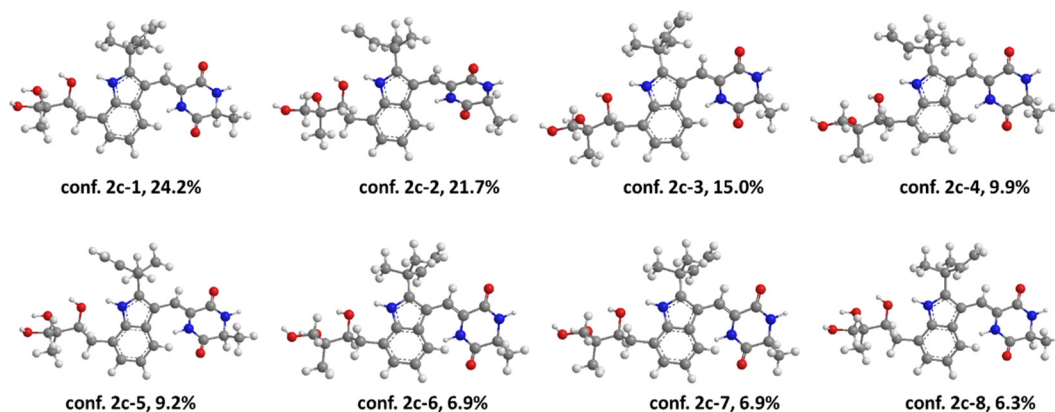

**Figure S22.** Optimized geometries of predominant conformers (weighting factors) for isomer **2d** at the B3LYP/6-31+g(d,p) level. A total of 177 conformers were searched and 7 of them possess Boltzmann distributions over 2%.

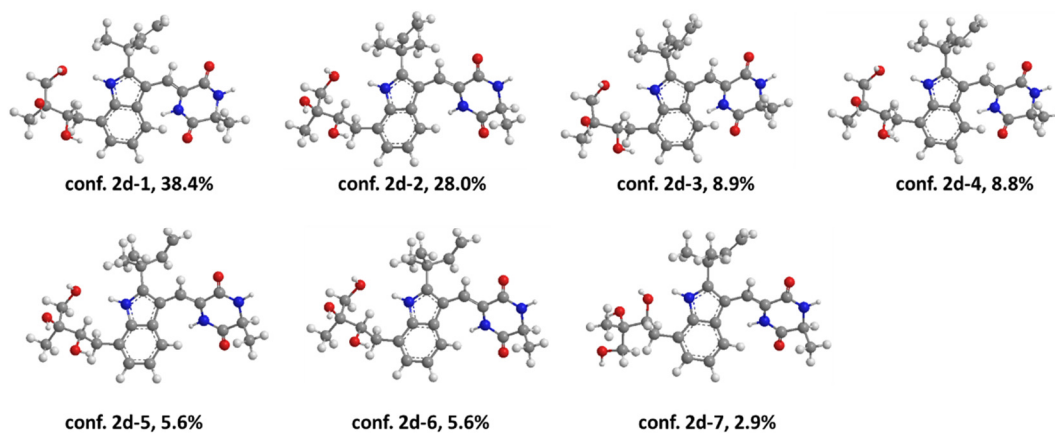



**Figure S23.** Chiral HPLC analysis of the acidic hydrolysate of compound **3**.

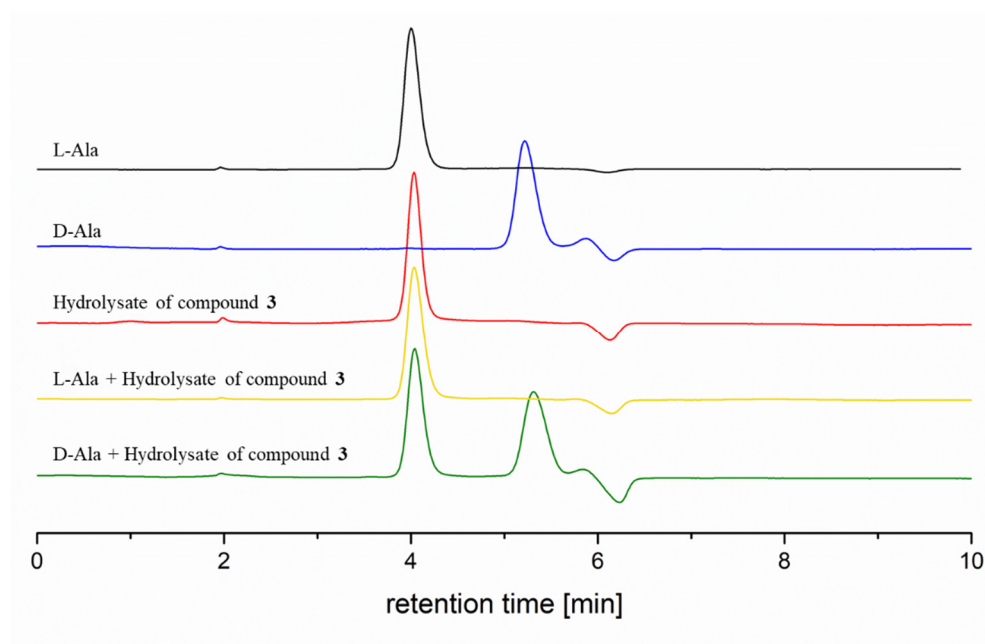

**Figure S24.**  $^1\text{H}$  NMR (500 MHz,  $\text{DMSO}-d_6$ ) spectrum of compound **3**.

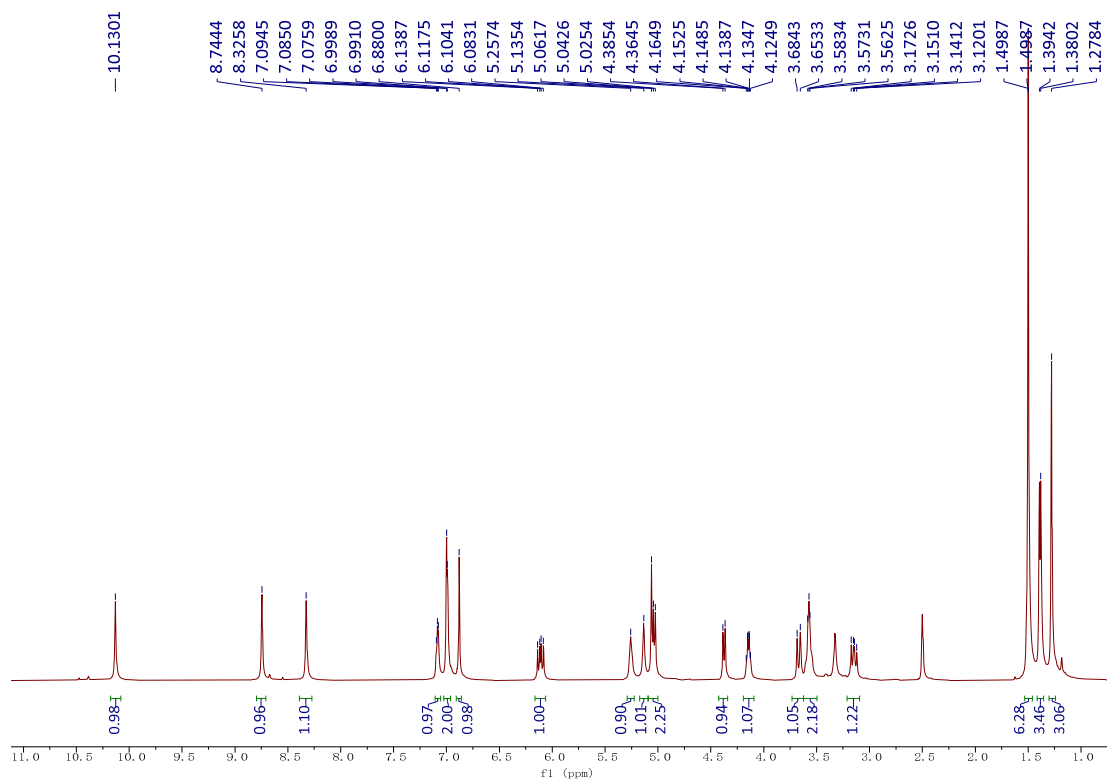

**Figure S25.**  $^{13}\text{C}$  NMR (125 MHz,  $\text{DMSO-}d_6$ ) and DEPT spectra of compound **3**.

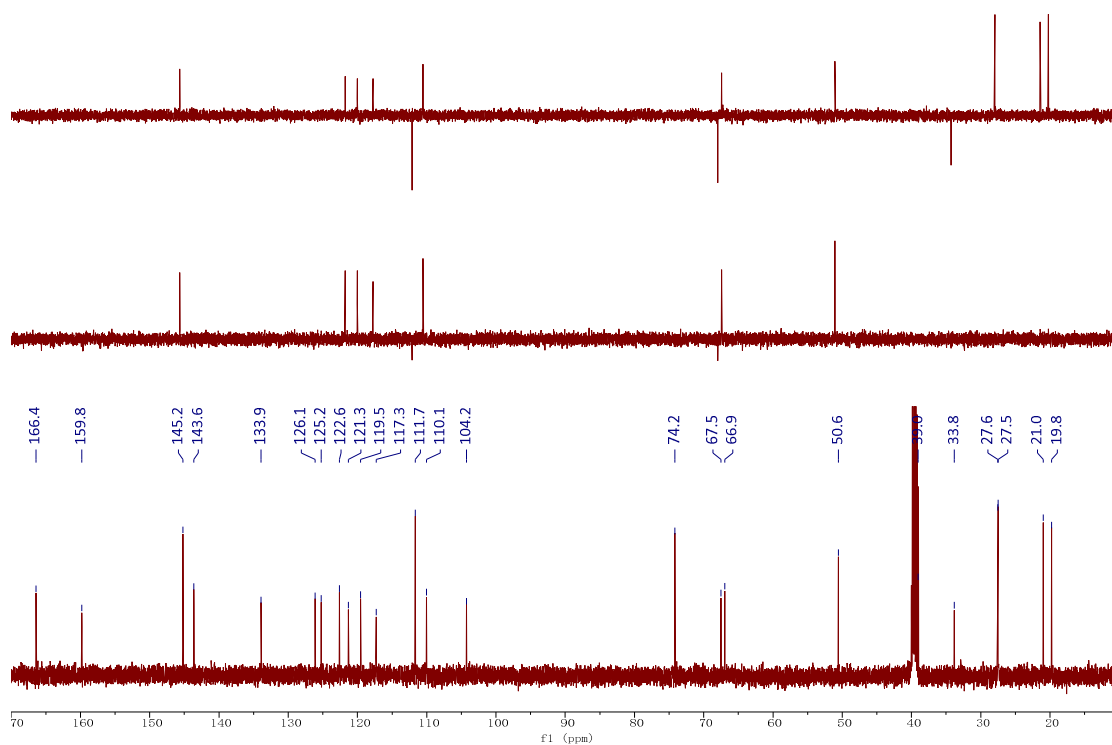

**Figure S26.** COSY spectrum of compound **3**.

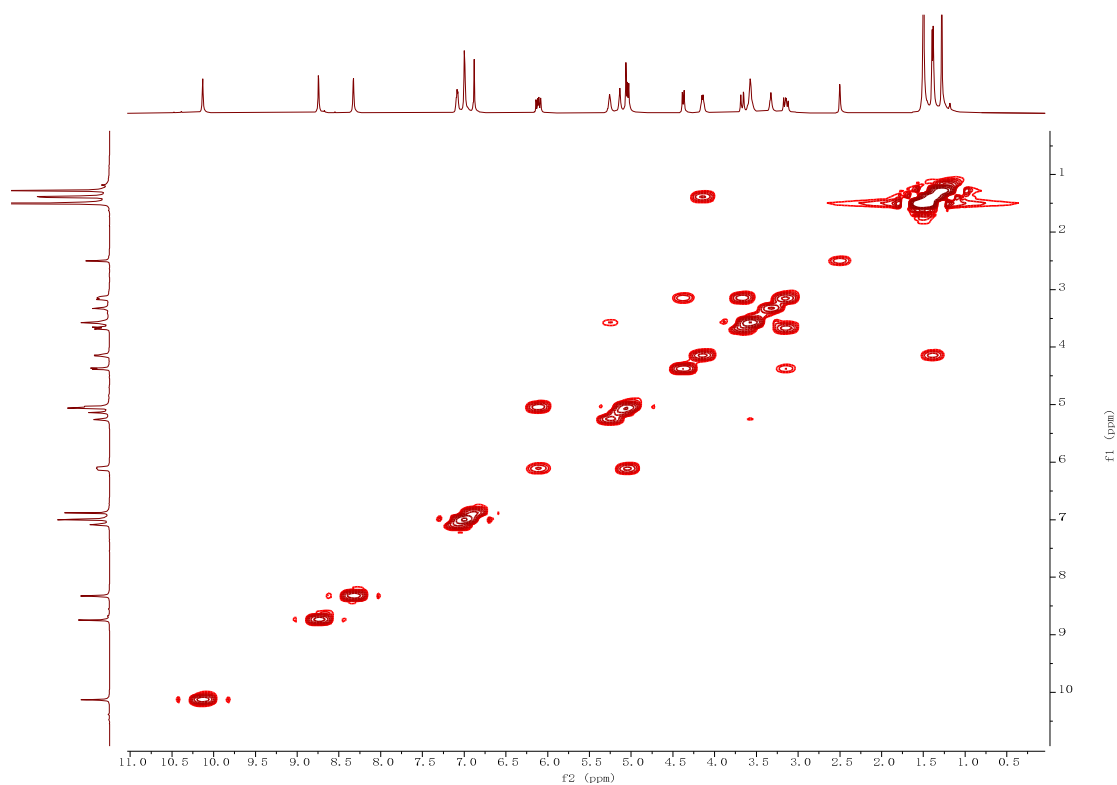

**Figure S27.** HSQC spectrum of compound **3**.

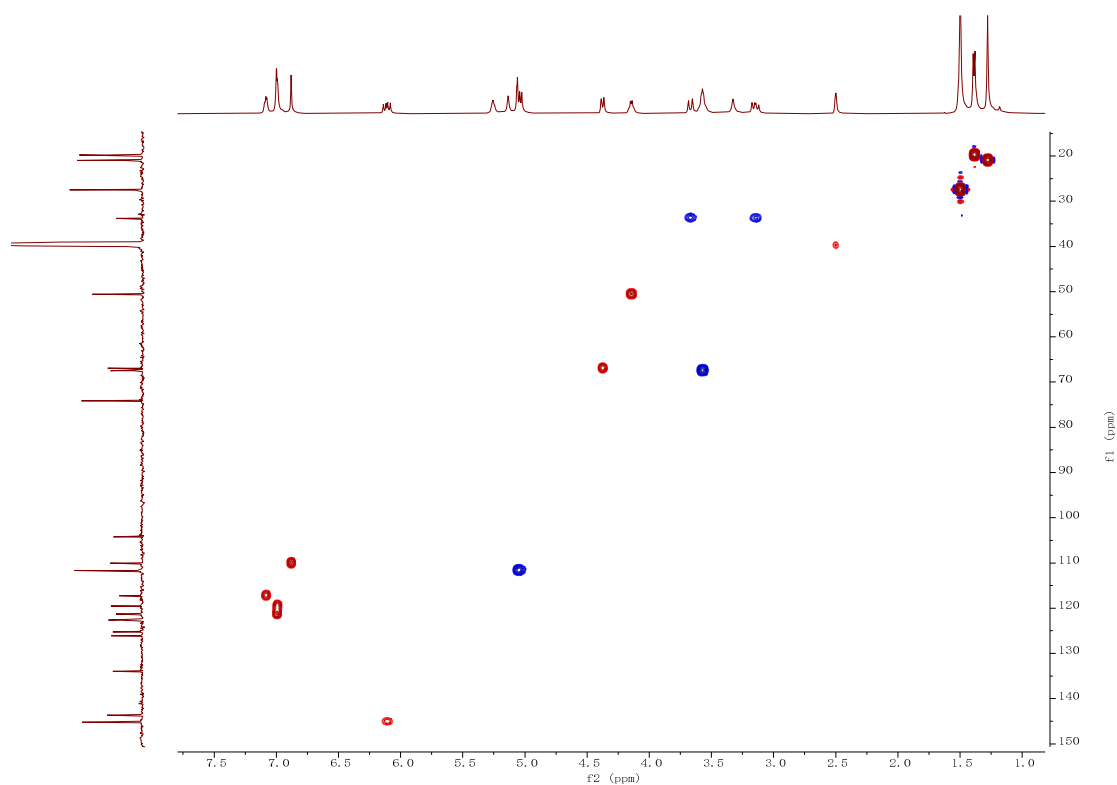

**Figure S28.** HMBC spectrum of compound **3**.

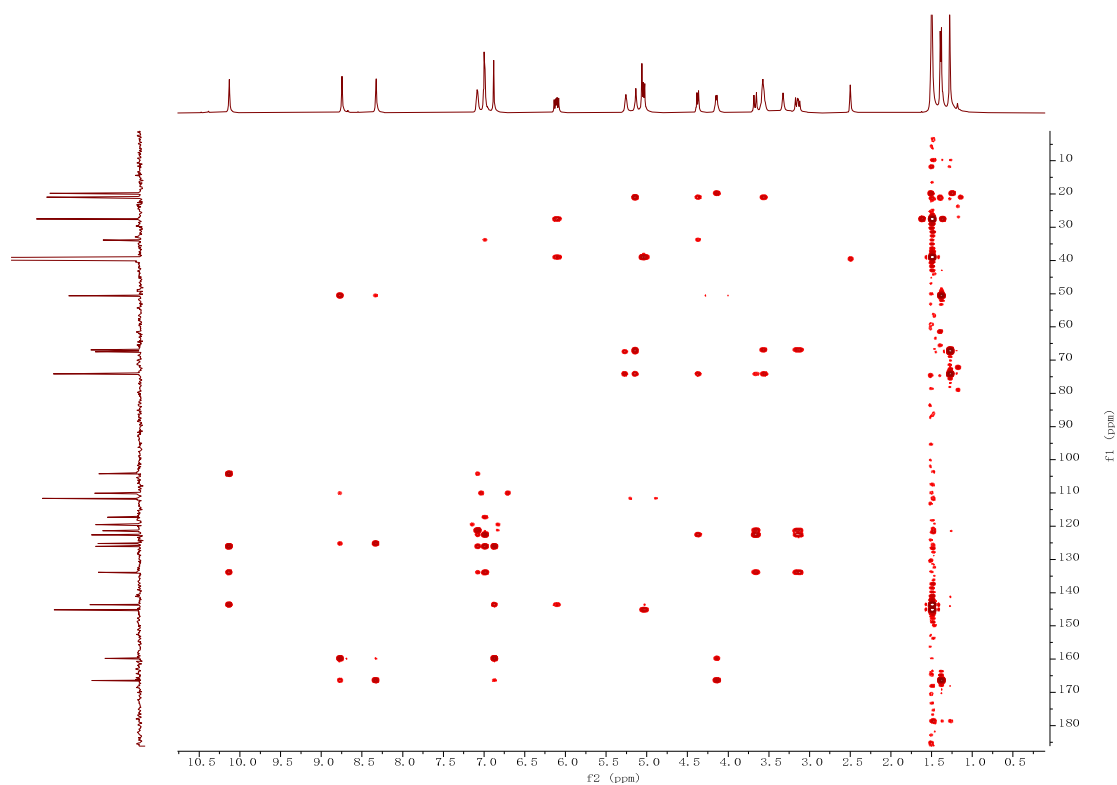

**Figure S29.** NOESY spectrum of compound 3.

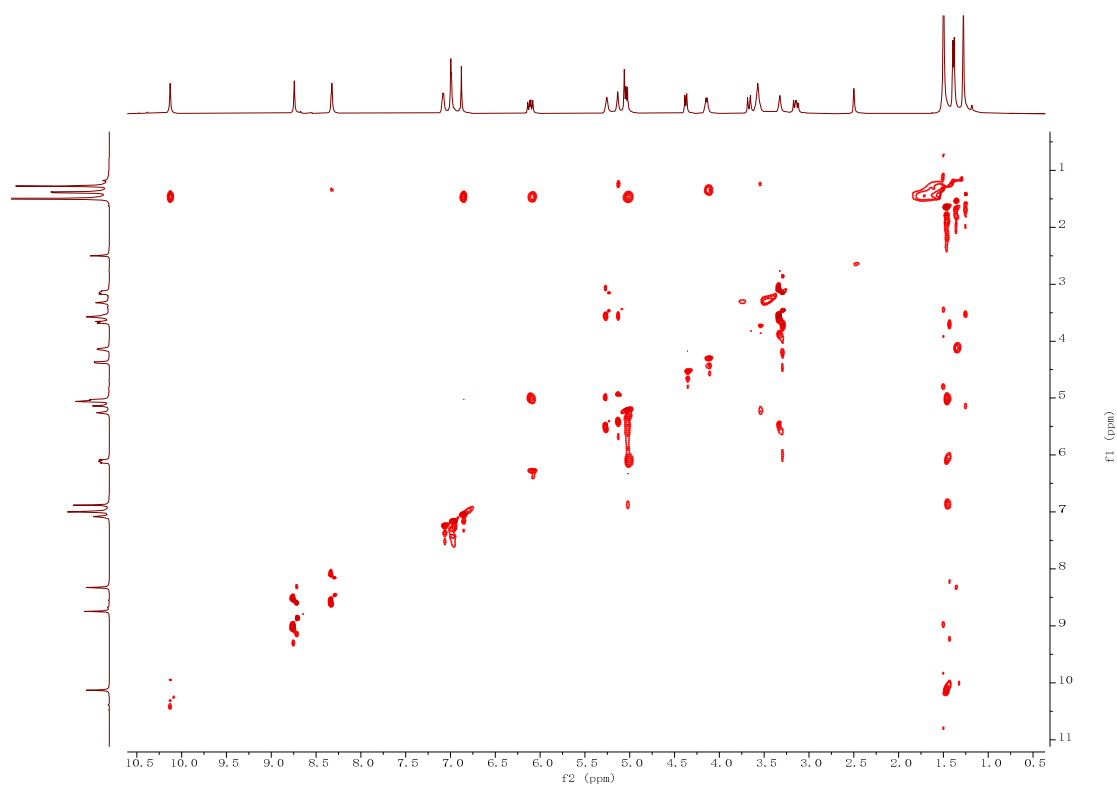

**Figure S30.** HR-ESI-MS spectrum of compound 3.

20200928-CS122-47\_200925143458 #13-14 RT: 0.11-0.11 AV: 2 NL: 1.49E6  
T: FTMS + p ESI Full ms [120.00-1000.00]

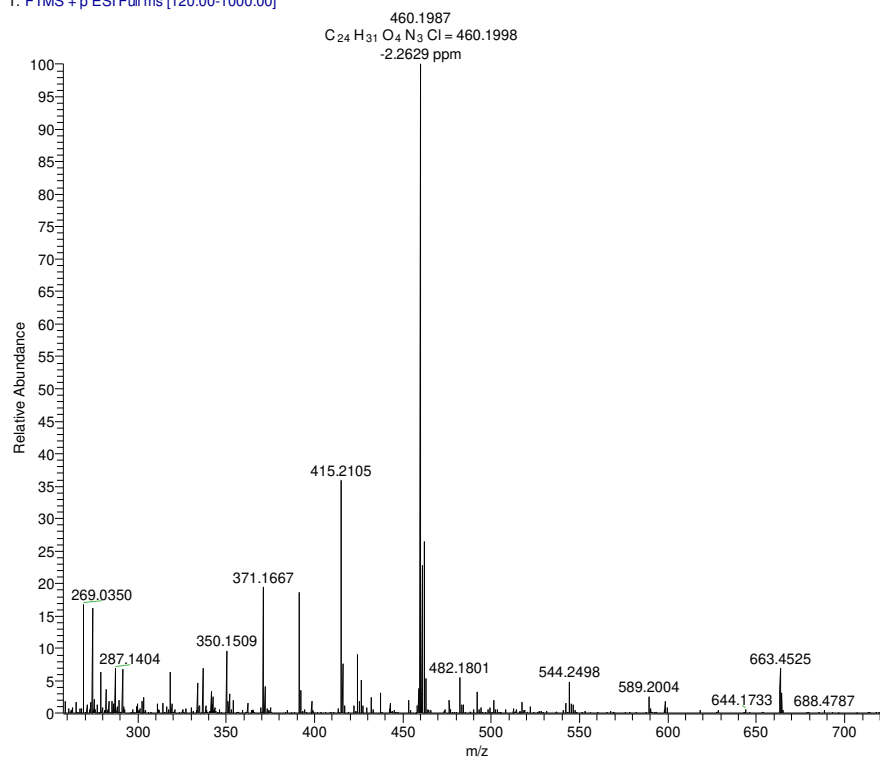

**Figure S31.** ECD spectrum of compound 3.

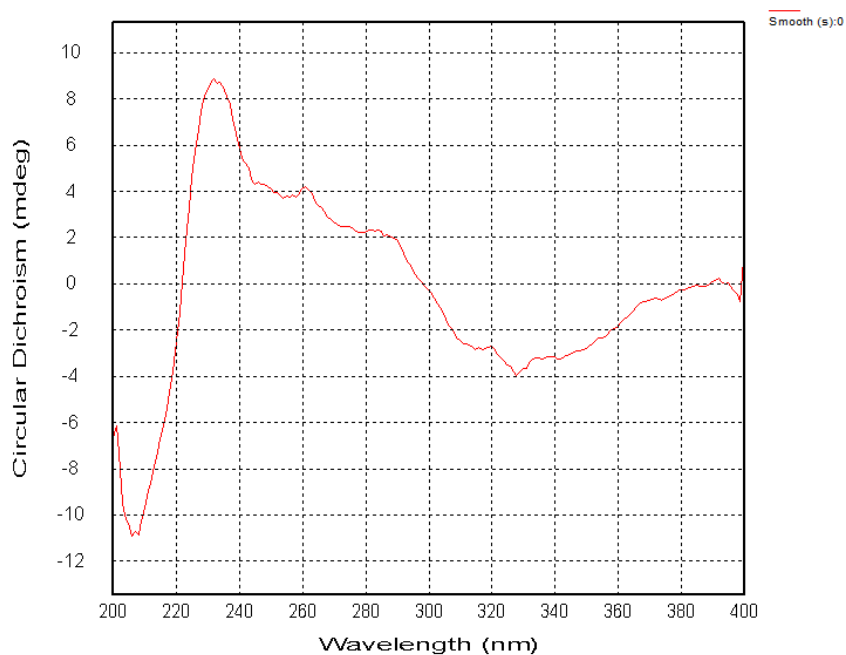

**Figure S32.** Structures of four possible isomers for DP4+ probability analysis of compound 3.

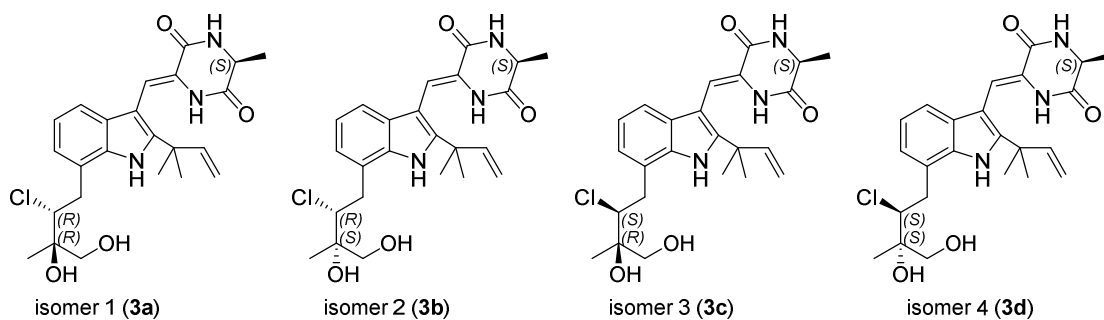

**Figure S33.** Optimized geometries of predominant conformers (weighting factors) for isomer **3a** at the B3LYP/6-31+g(d,p) level. A total of 155 conformers were searched and 6 of them possess Boltzmann distributions over 2%.

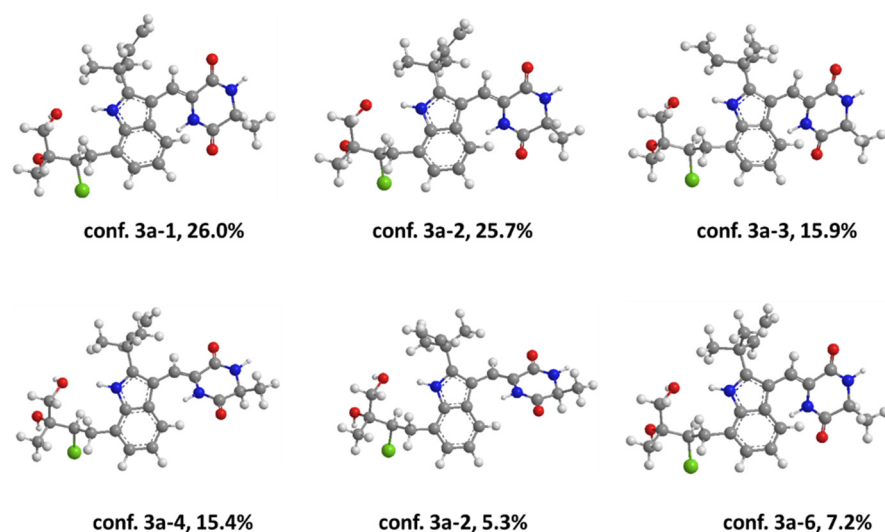

**Figure S34.** Optimized geometries of predominant conformers (weighting factors) for isomer **3b** at the B3LYP/6-31+g(d,p) level. A total of 168 conformers were searched and 8 of them possess Boltzmann distributions over 2%.

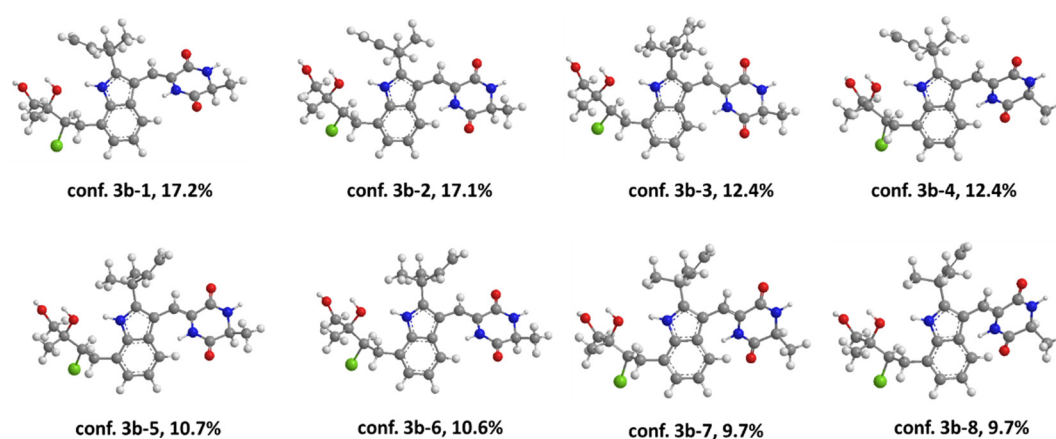

**Figure S35.** Optimized geometries of predominant conformers (weighting factors) for isomer **3c** at the B3LYP/6-31+g(d,p) level. A total of 176 conformers were searched and 8 of them possess Boltzmann distributions over 2%.

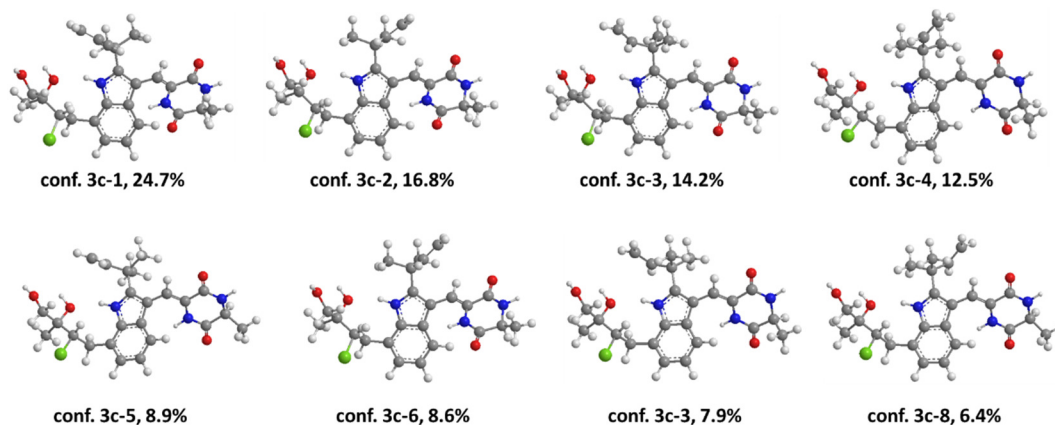

**Figure S36.** Optimized geometries of predominant conformers (weighting factors) for isomer **3d** at the B3LYP/6-31+g(d,p) level. A total of 146 conformers were searched and 8 of them possess Boltzmann distributions over 2%.

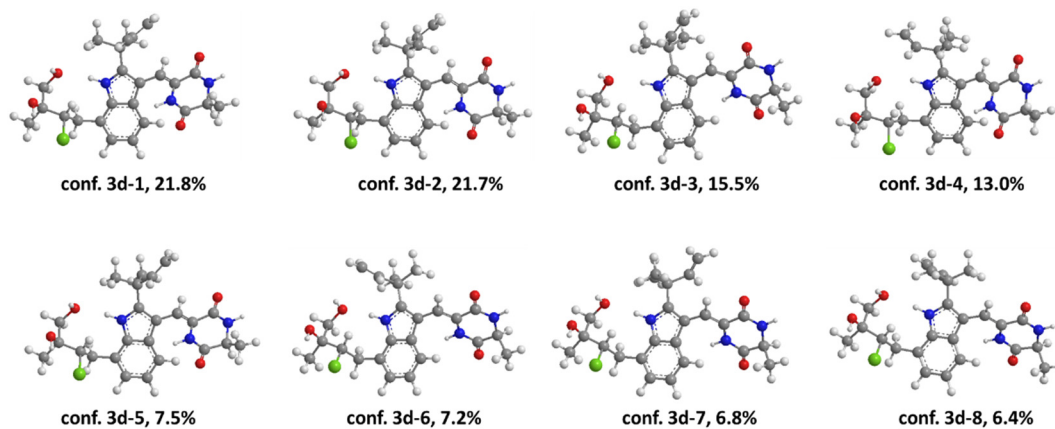

**Figure S37.** Chiral HPLC analysis of the acidic hydrolysate of compound **4**.

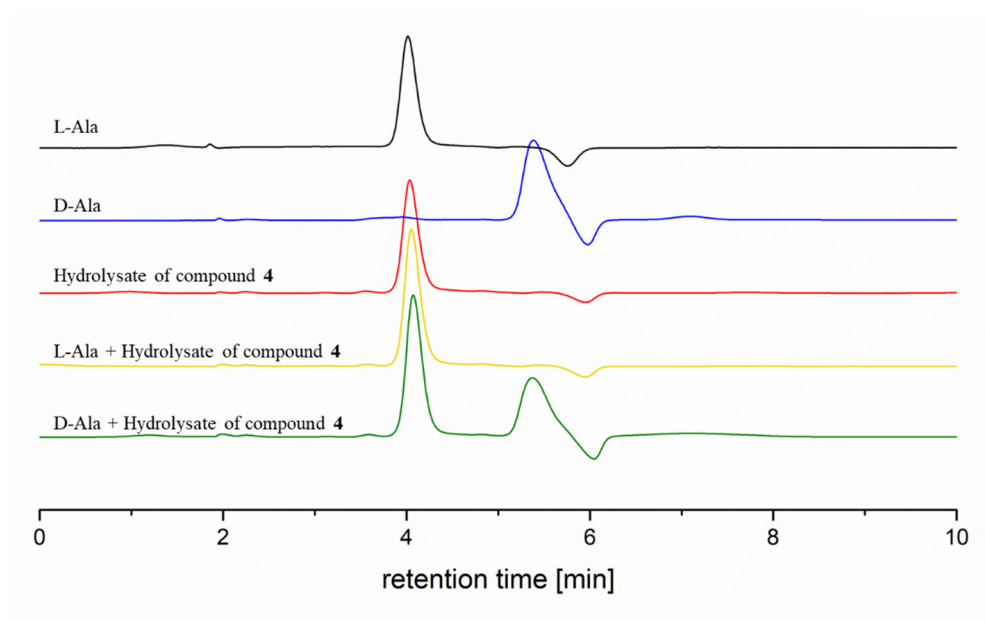

**Figure S38.**  $^1\text{H}$  NMR (500 MHz,  $\text{DMSO}-d_6$ ) spectrum of compound **4**.

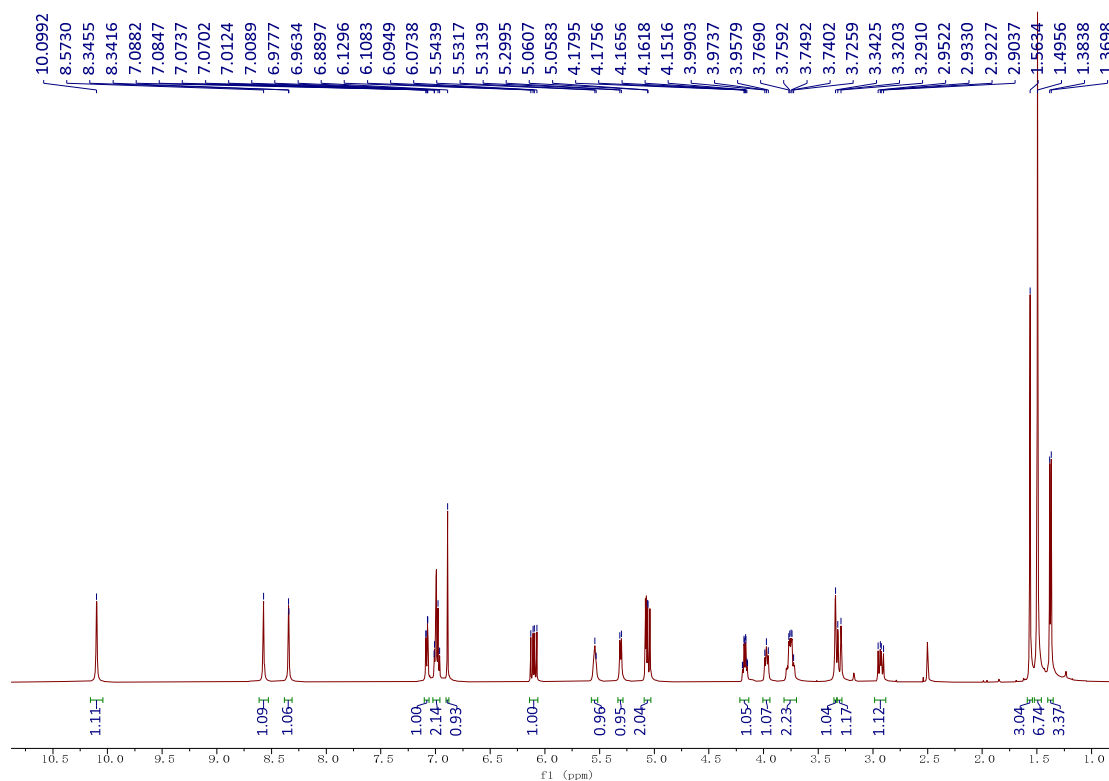



**Figure S39.**  $^{13}\text{C}$  NMR (125 MHz,  $\text{DMSO-}d_6$ ) and DEPT spectra of compound **4**.

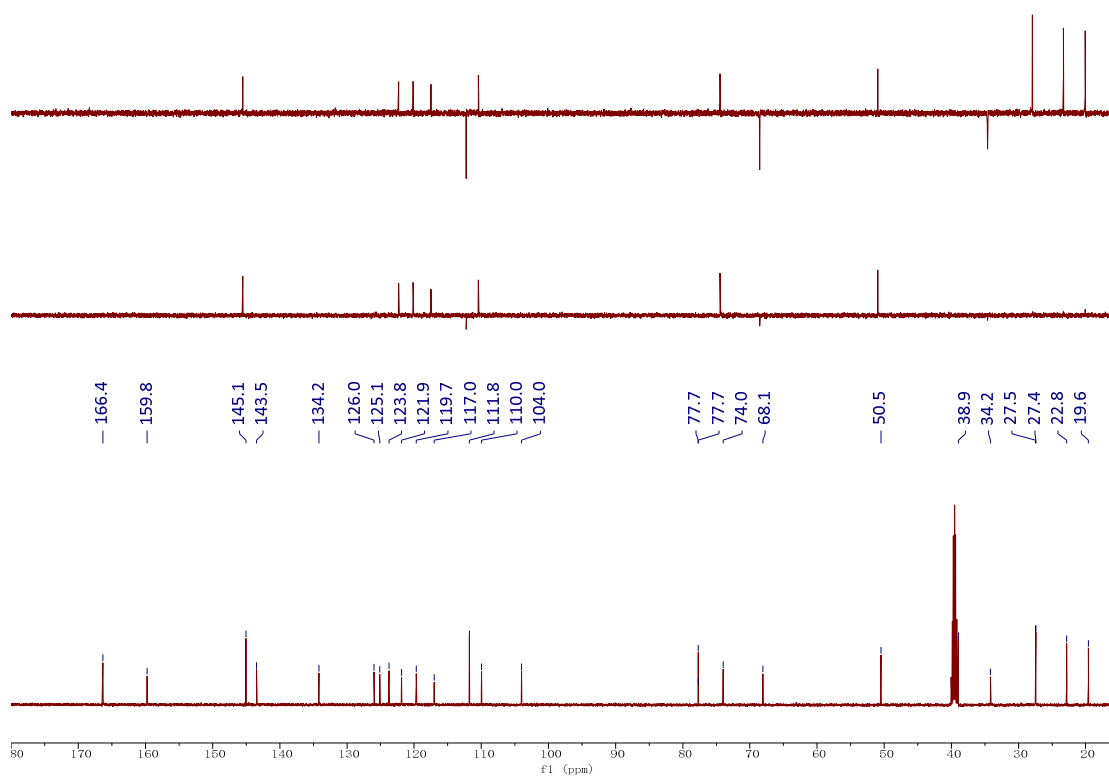

**Figure S40.** COSY spectrum of compound **4**.

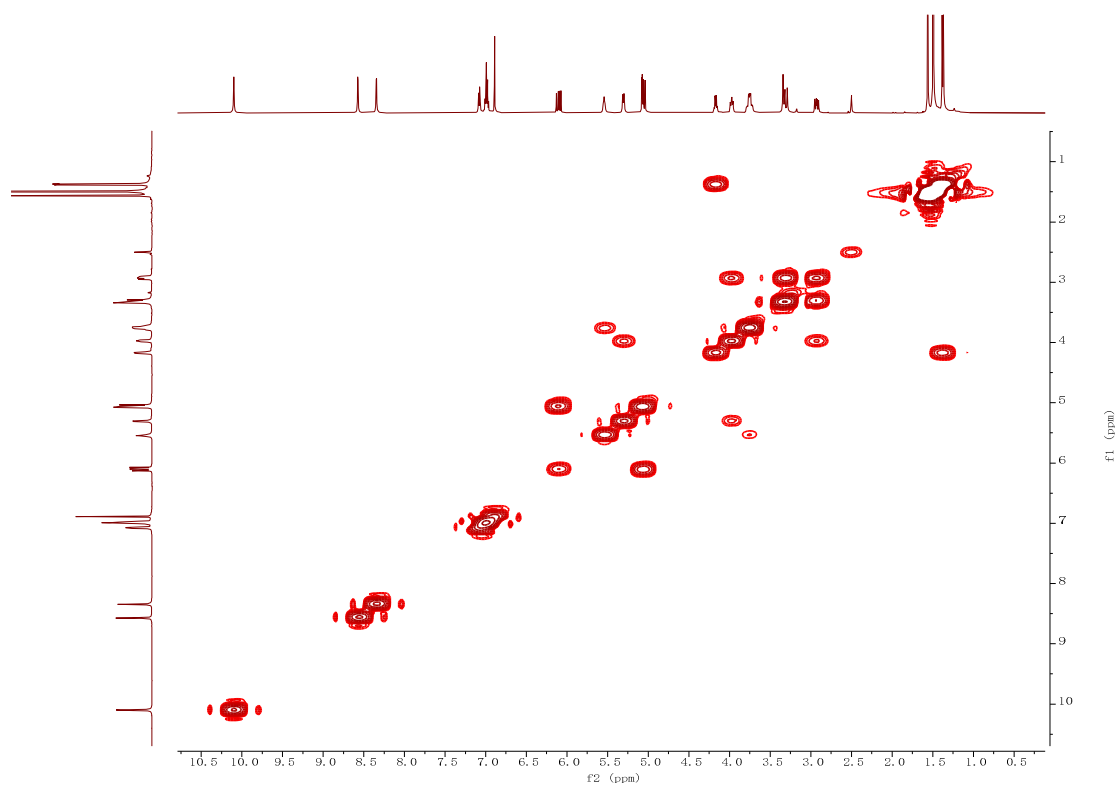

**Figure S41.** HSQC spectrum of compound **4**.

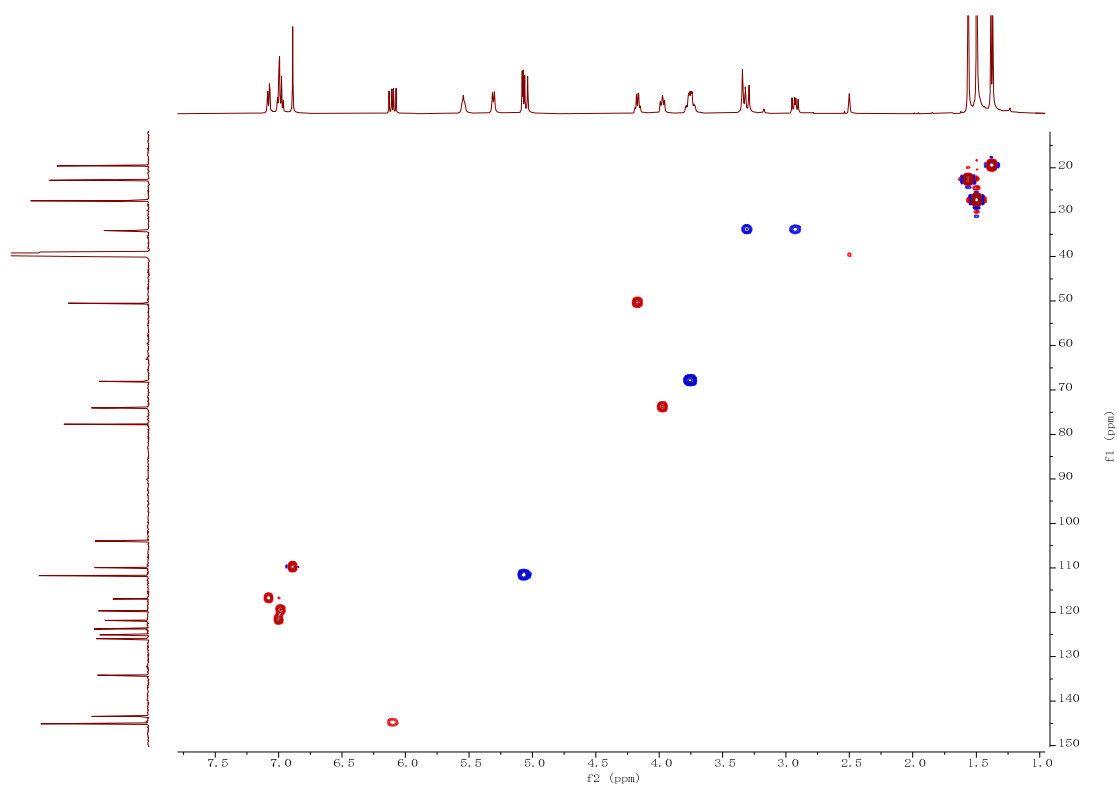

**Figure S42.** HMBC spectrum of compound **4**.

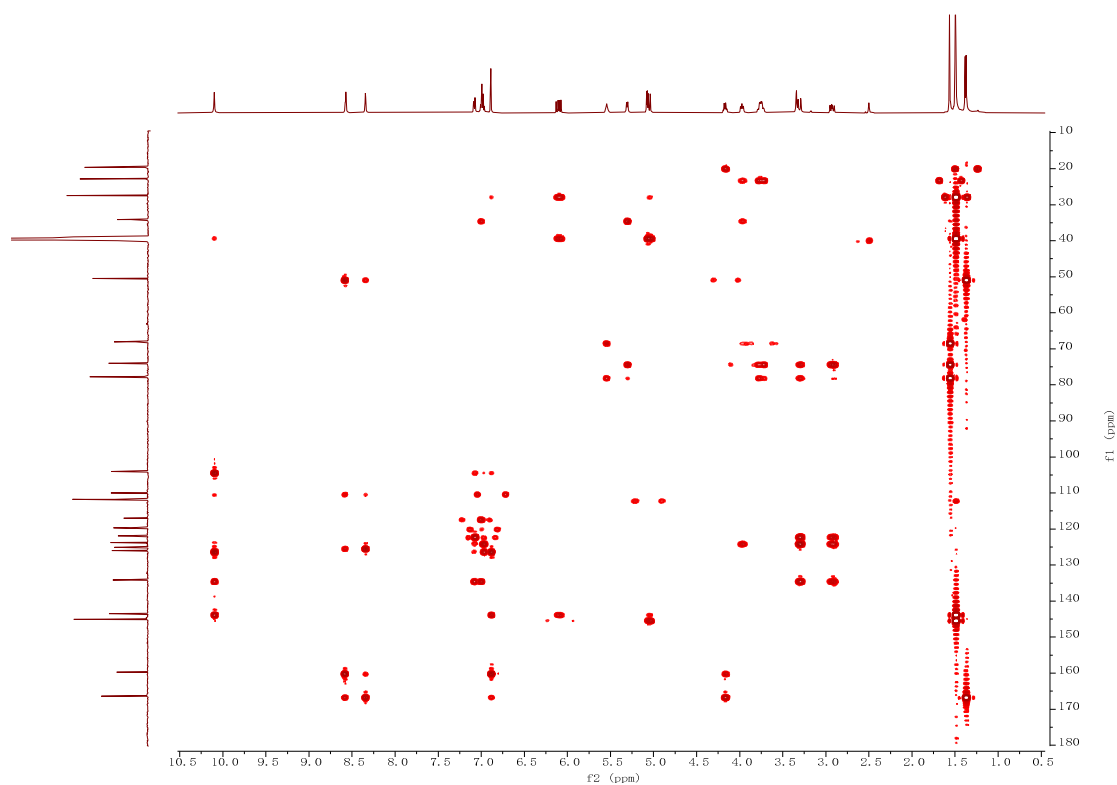

**Figure S43.** NOESY spectrum of compound **4**.

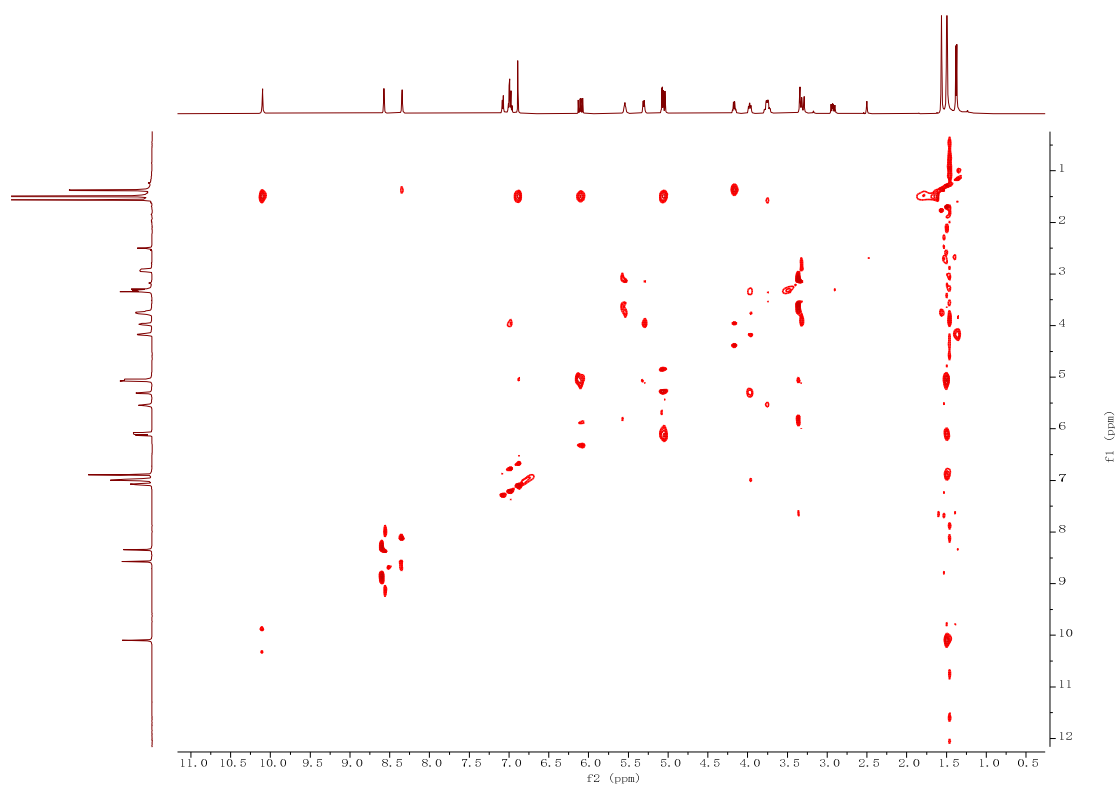

**Figure S44.** HR-ESI-MS spectrum of compound **4**.

20201202-CS122-60\_201202082153 #81-82 RT: 0.64-0.65 AV: 2 NL: 1.40E7  
T: FTMS + p ESI Full ms [100.00-1000.00]

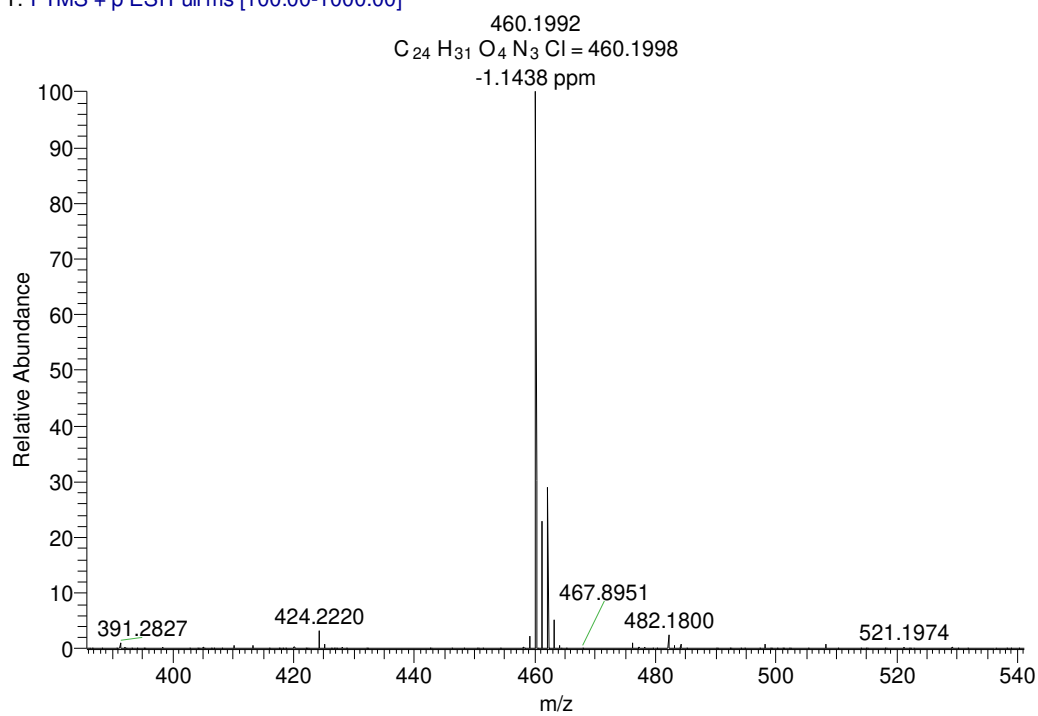

**Figure S45.** ECD spectrum of compound **4**.

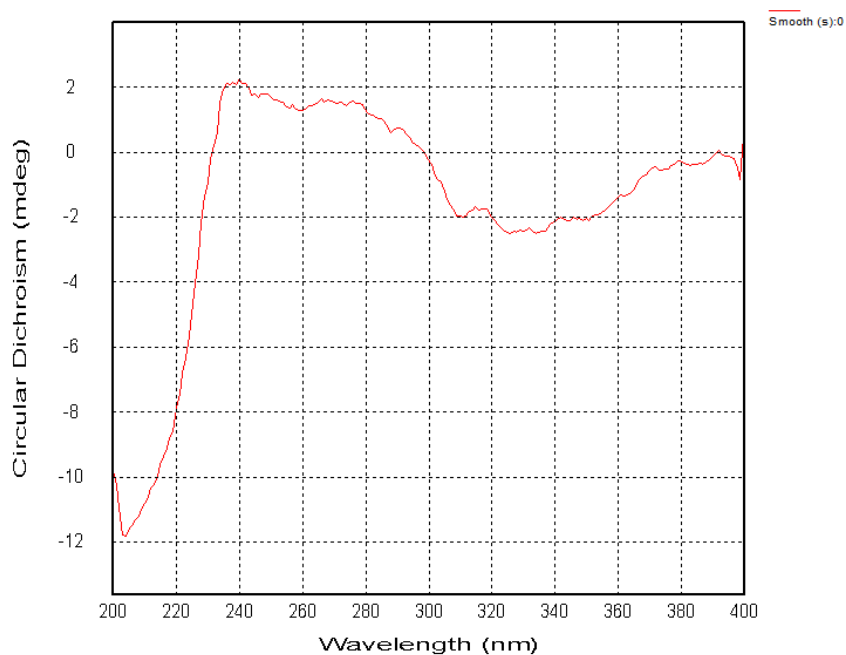

**Figure S46.** Structures of four possible isomers for DP4+ probability analysis of compound **4**.

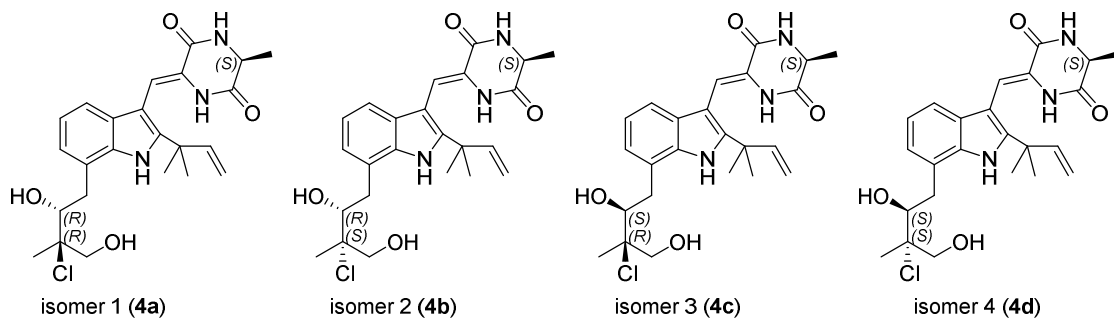

**Figure S47.** Optimized geometries of predominant conformers (weighting factors) for isomer **4a** at the B3LYP/6-31+g(d,p) level. A total of 270 conformers were searched and 7 of them possess Boltzmann distributions over 2%.

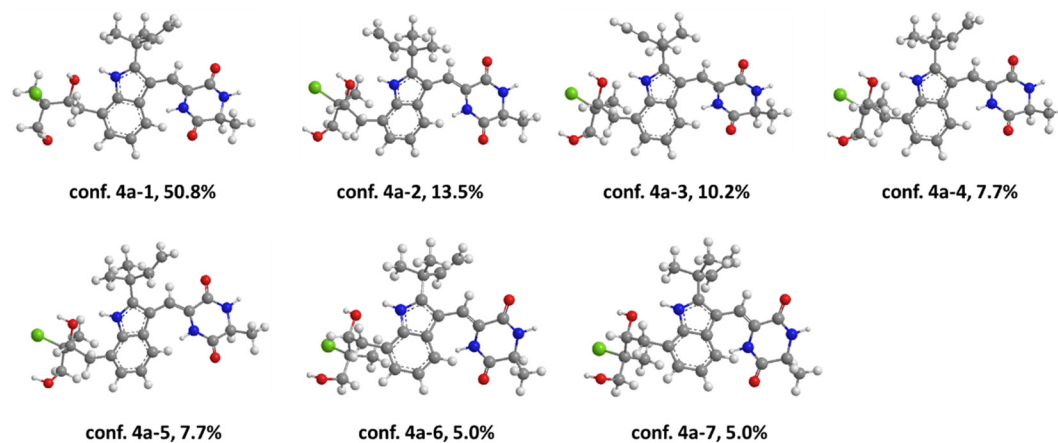

**Figure S48.** Optimized geometries of predominant conformers (weighting factors) for isomer **4b** at the B3LYP/6-31+g(d,p) level. A total of 349 conformers were searched and 4 of them possess Boltzmann distributions over 2%.

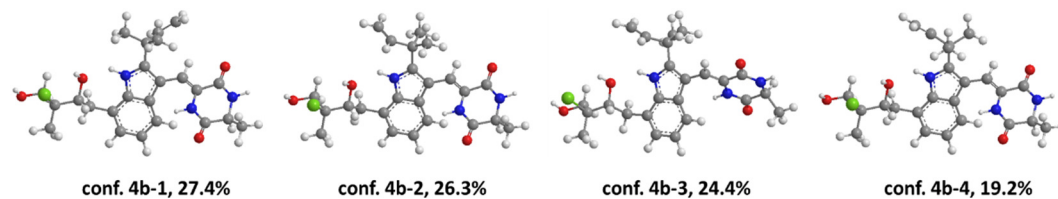

**Figure S49.** Optimized geometries of predominant conformers (weighting factors) for isomer **4c** at the B3LYP/6-31+g(d,p) level. A total of 327 conformers were searched and 6 of them possess Boltzmann distributions over 2%.

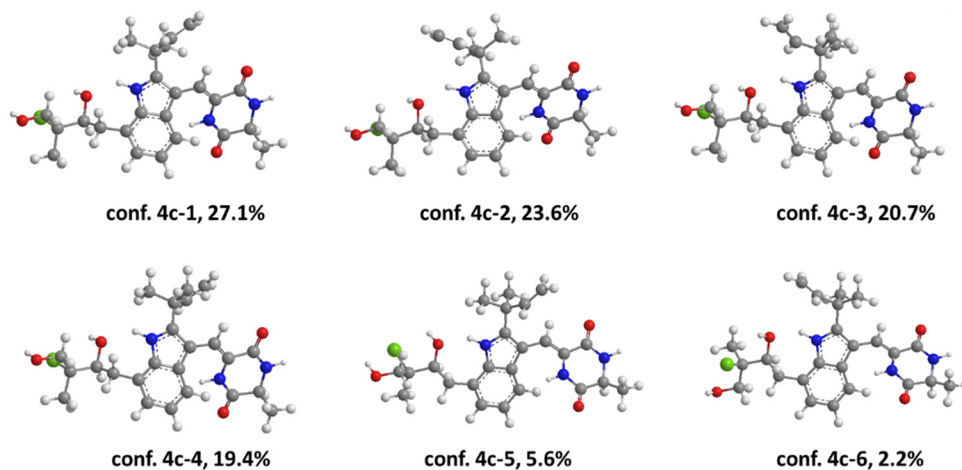

**Figure S50.** Optimized geometries of predominant conformers (weighting factors) for isomer **4d** at the B3LYP/6-31+g(d,p) level. A total of 281 conformers were searched and 6 of them possess Boltzmann distributions over 2%.

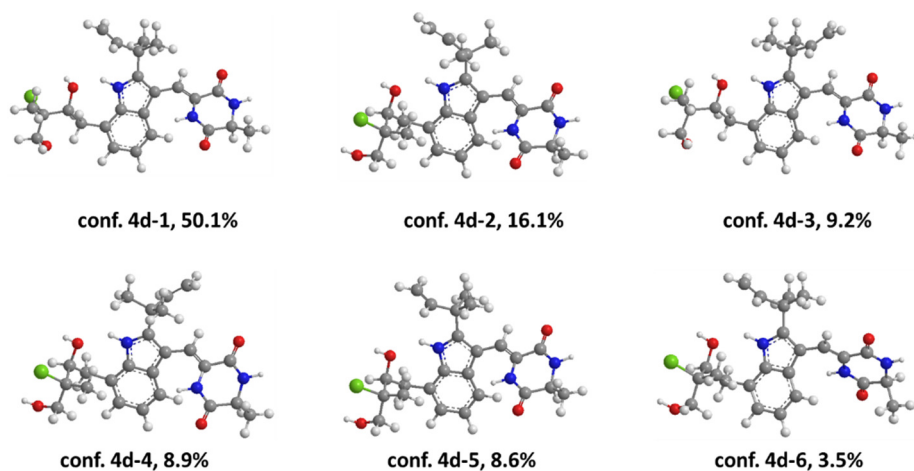

**Figure S51.** Chiral HPLC analysis of the acidic hydrolysate of compound **5**.

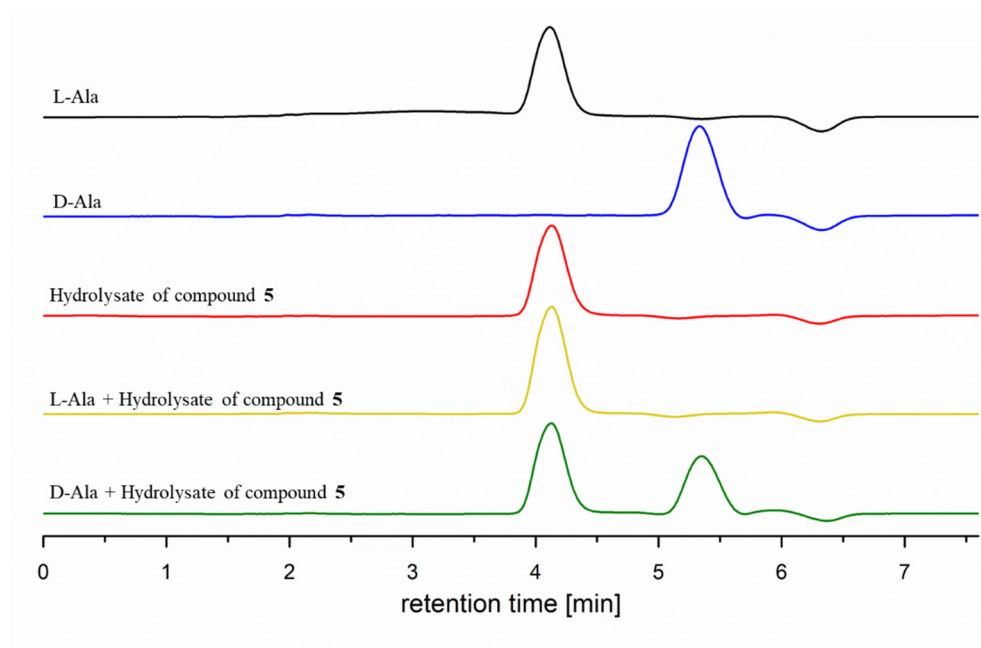

**Figure S52.**  $^1\text{H}$  NMR (500 MHz,  $\text{DMSO}-d_6$ ) spectrum of compound **5**.

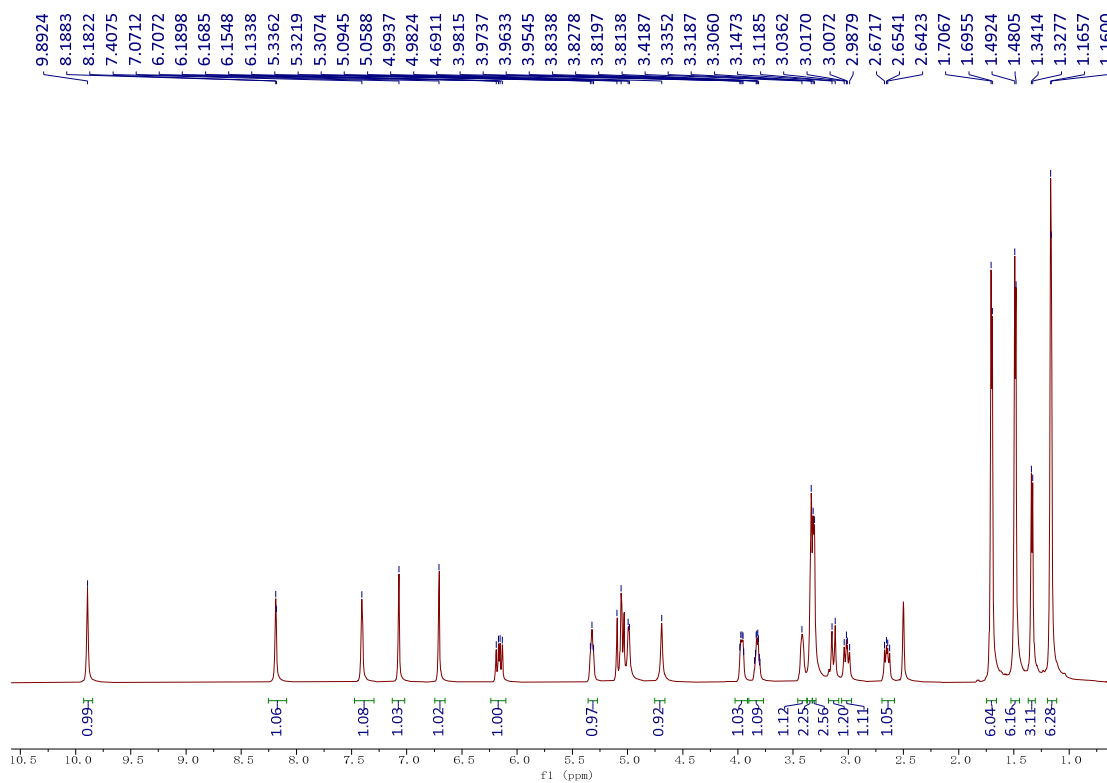

**Figure S53.**  $^{13}\text{C}$  NMR (125 MHz,  $\text{DMSO}-d_6$ ) and DEPT spectra of compound 5.

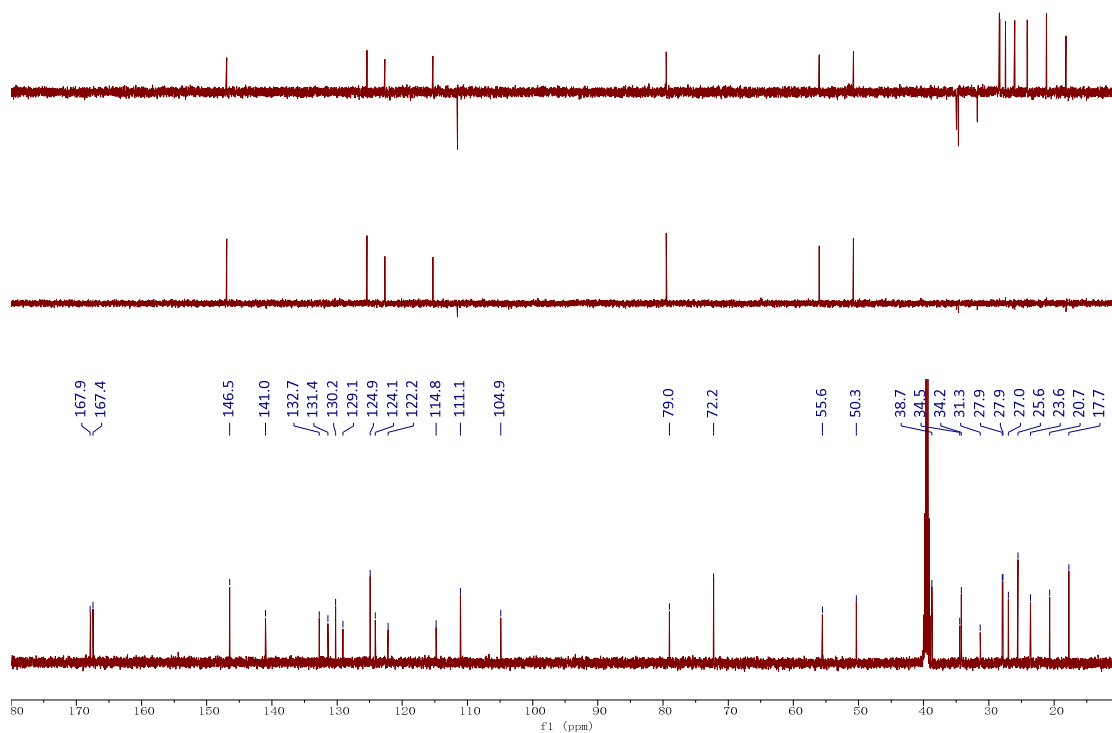

**Figure S54.** COSY spectrum of compound 5.

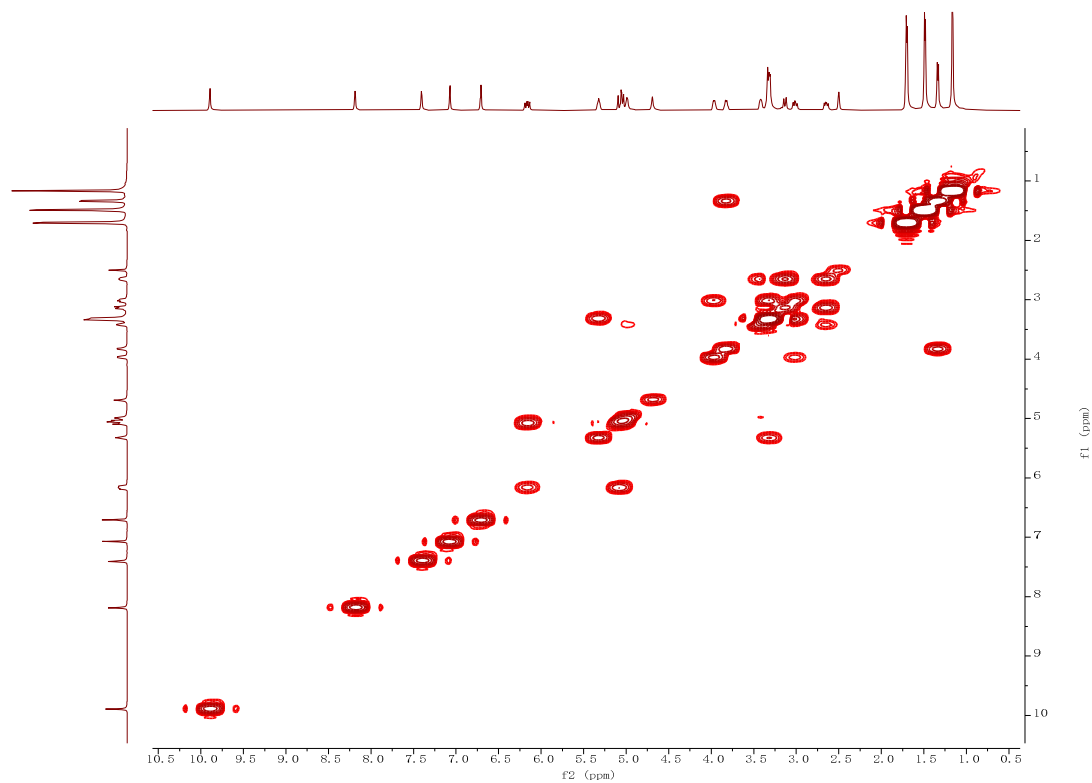



**Figure S55.** HSQC spectrum of compound 5.

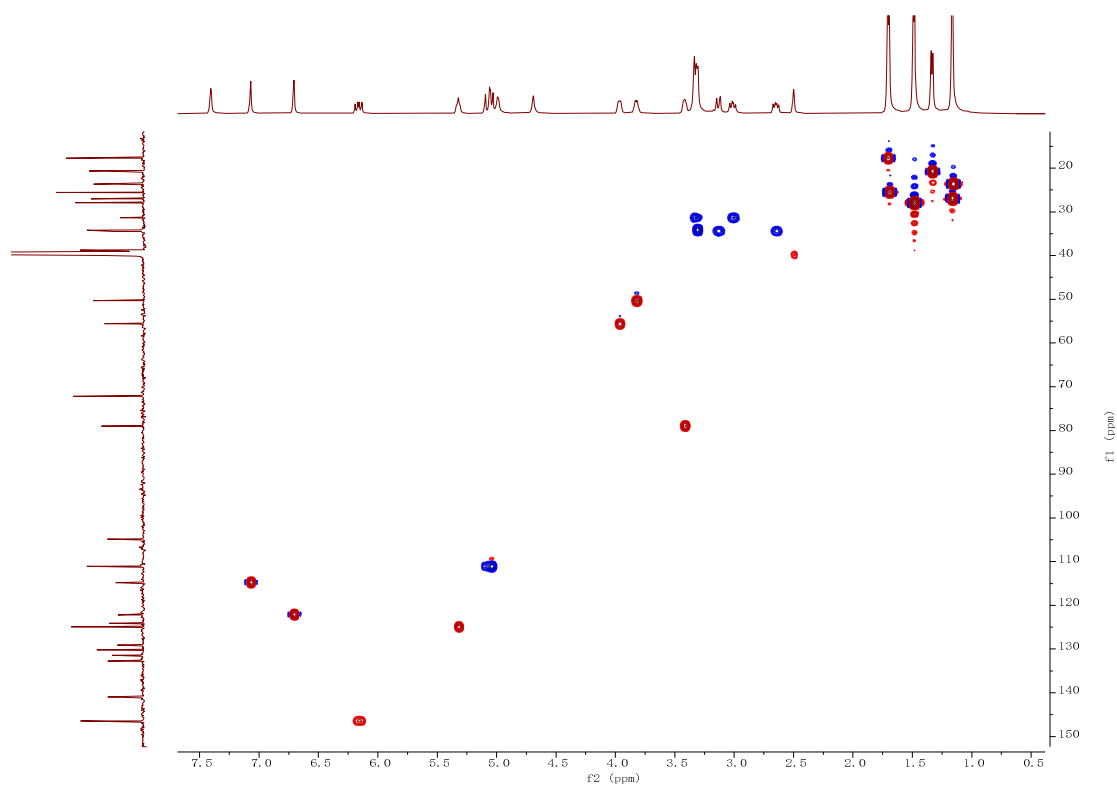

**Figure S56.** HMBC spectrum of compound 5.

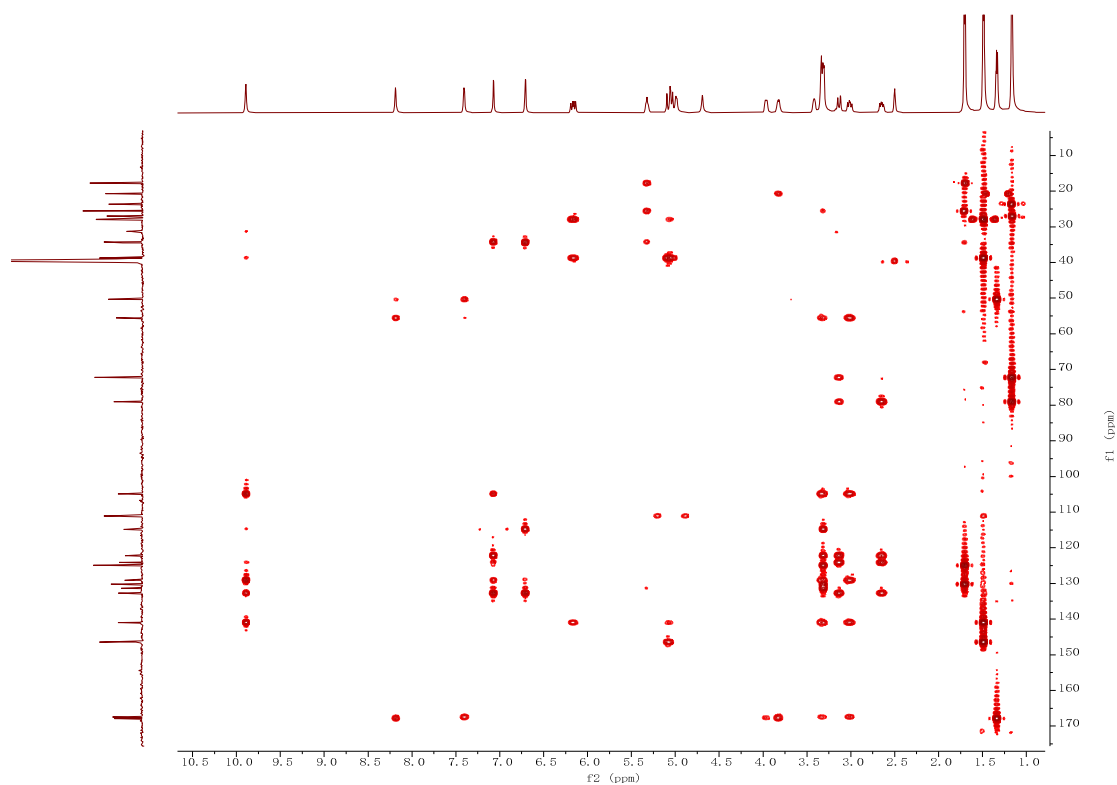

**Figure S57.** NOESY spectrum of compound 5.

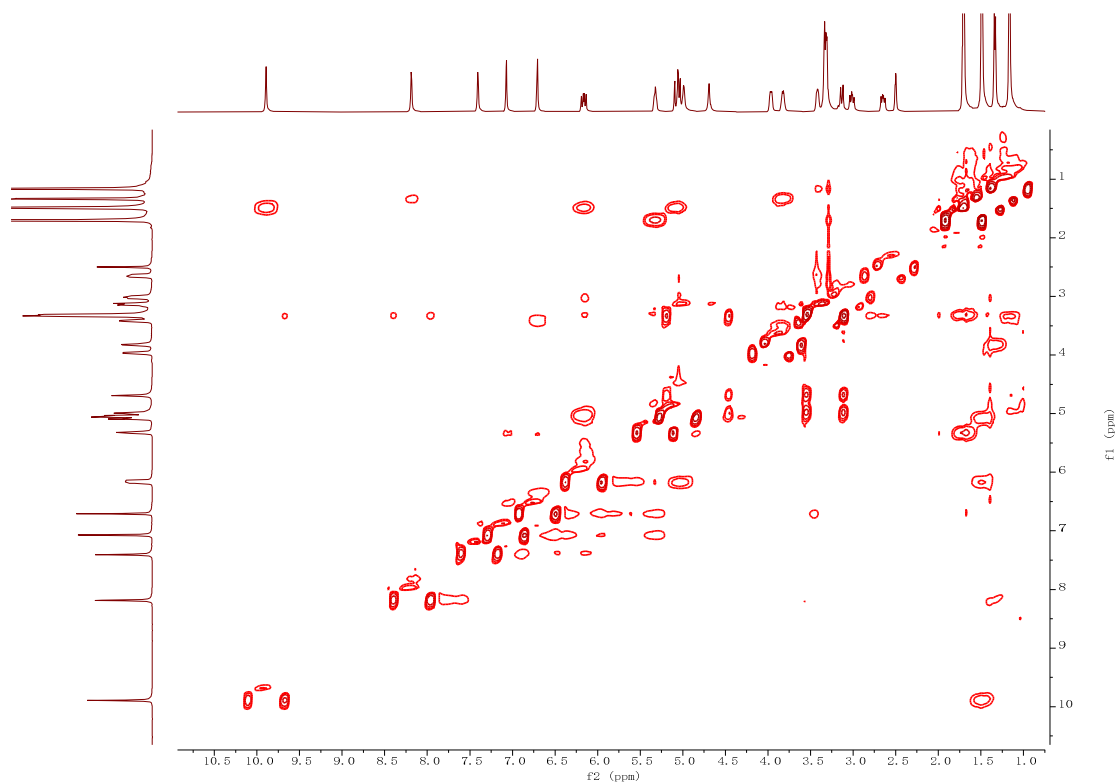

**Figure S58.** HR-ESI-MS spectrum of compound 5.

20200928-CS122-45\_200928145435 #146-149 RT: 1.55-1.58 AV: 4 NL: 6.73E6  
T: FTMS + p ESI Full ms [120.00-1000.00]

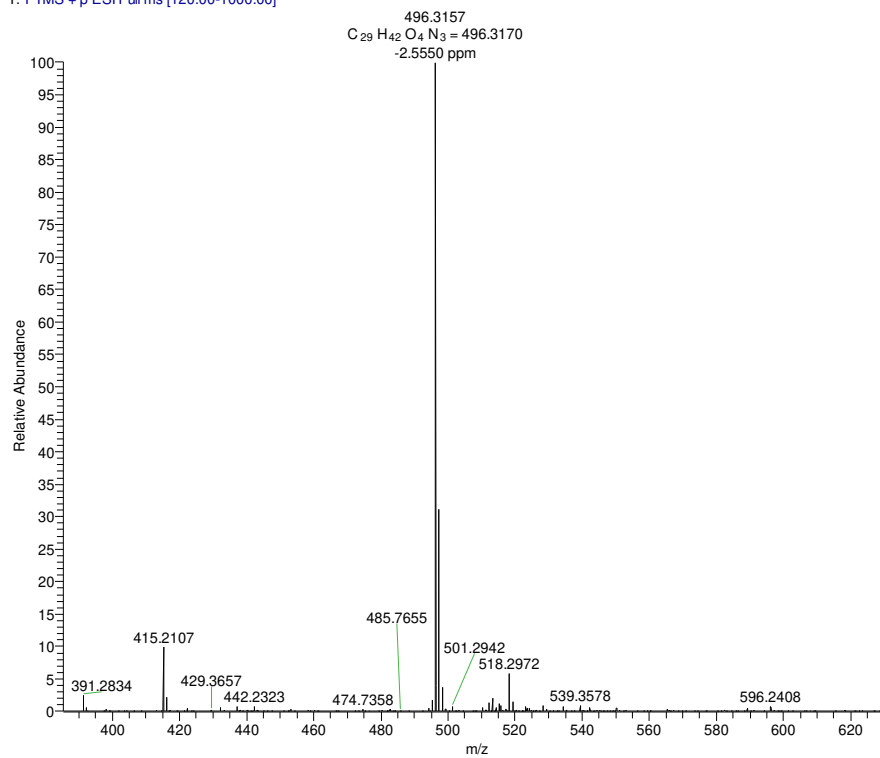

**Figure S59.** ECD spectrum of compound 5.

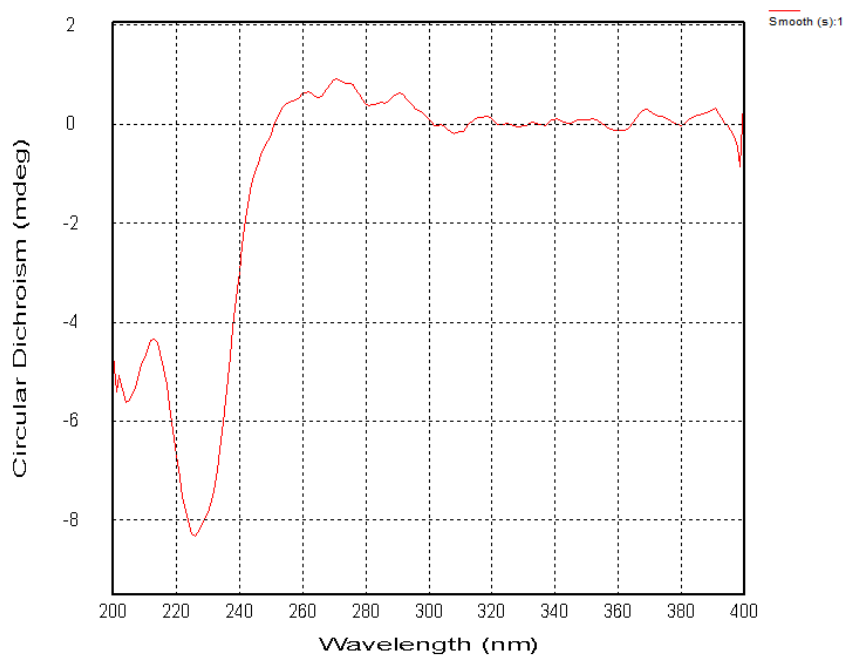

**Figure S60.**  $^1\text{H}$  NMR (500 MHz,  $\text{DMSO-}d_6$ ) spectrum ( $\delta_{\text{H}}$  range from 0.8 to 2.0 ppm) of compound 7 compared with 4.

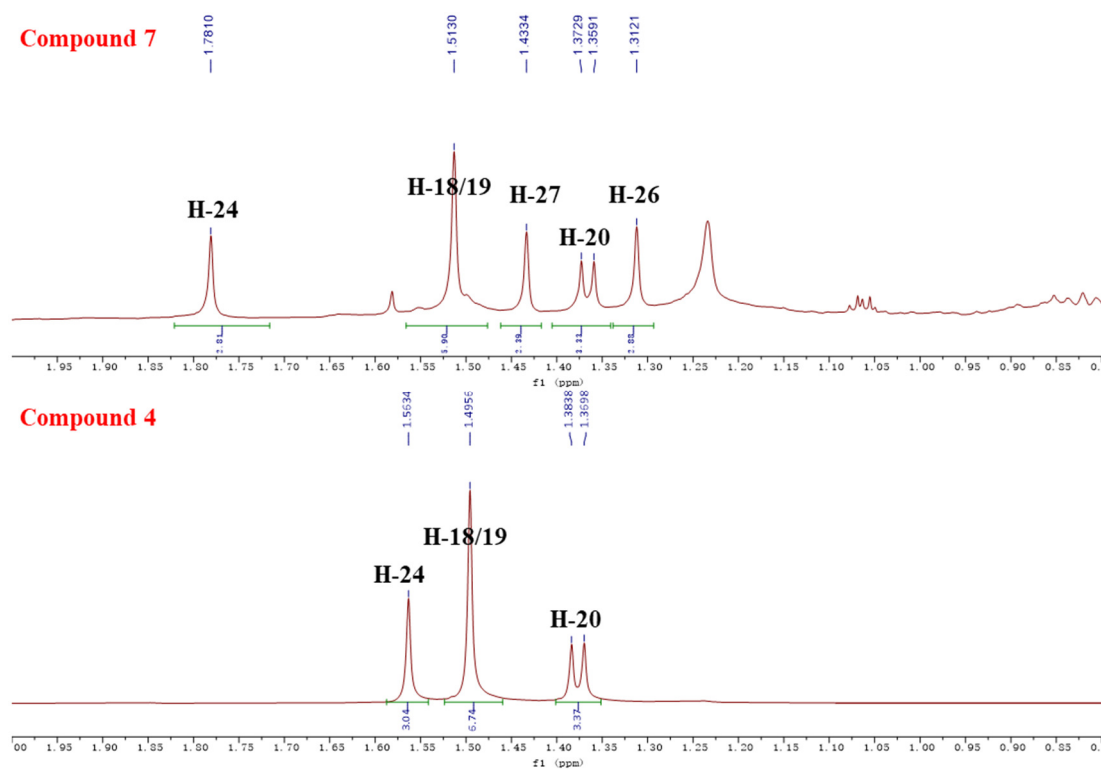

**Figure S61.**  $^1\text{H}$  NMR (500 MHz,  $\text{DMSO}-d_6$ ) spectrum ( $\delta_{\text{H}}$  range from 2.5 to 4.5 ppm) of compound **7** compared with **4**.

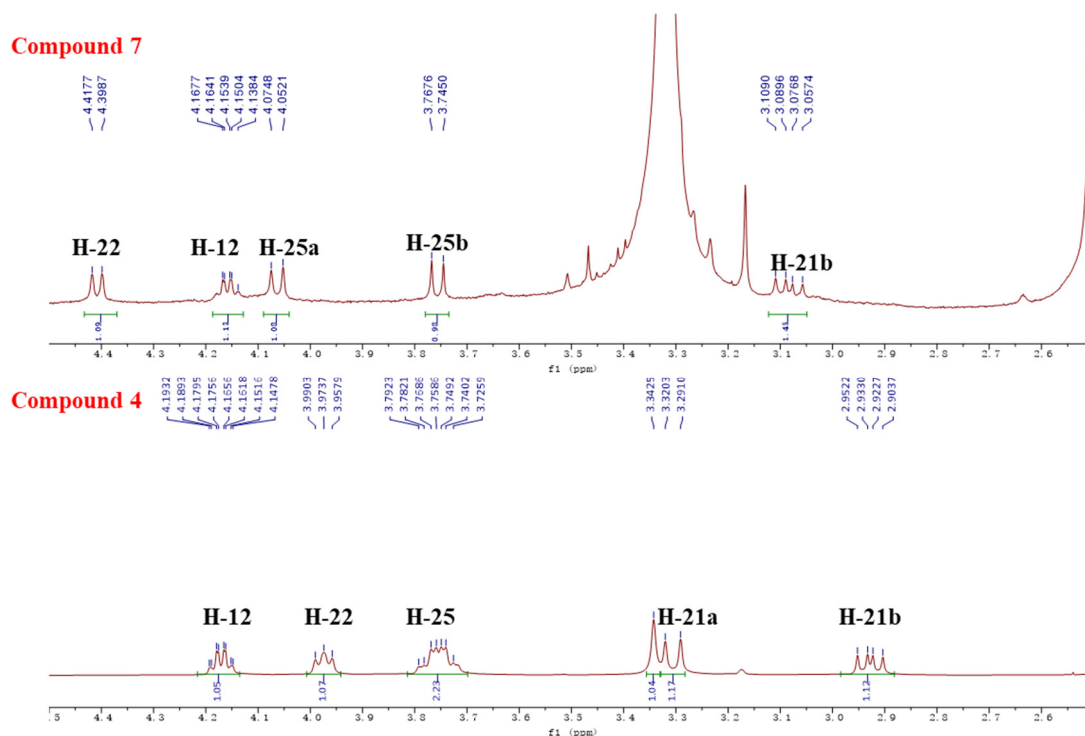

**Figure S62.**  $^{13}\text{C}$  NMR (125 MHz,  $\text{DMSO}-d_6$ ) spectrum ( $\delta_{\text{C}}$  range from 15.0 to 33.0 ppm) of compound **7** compared with **4**.

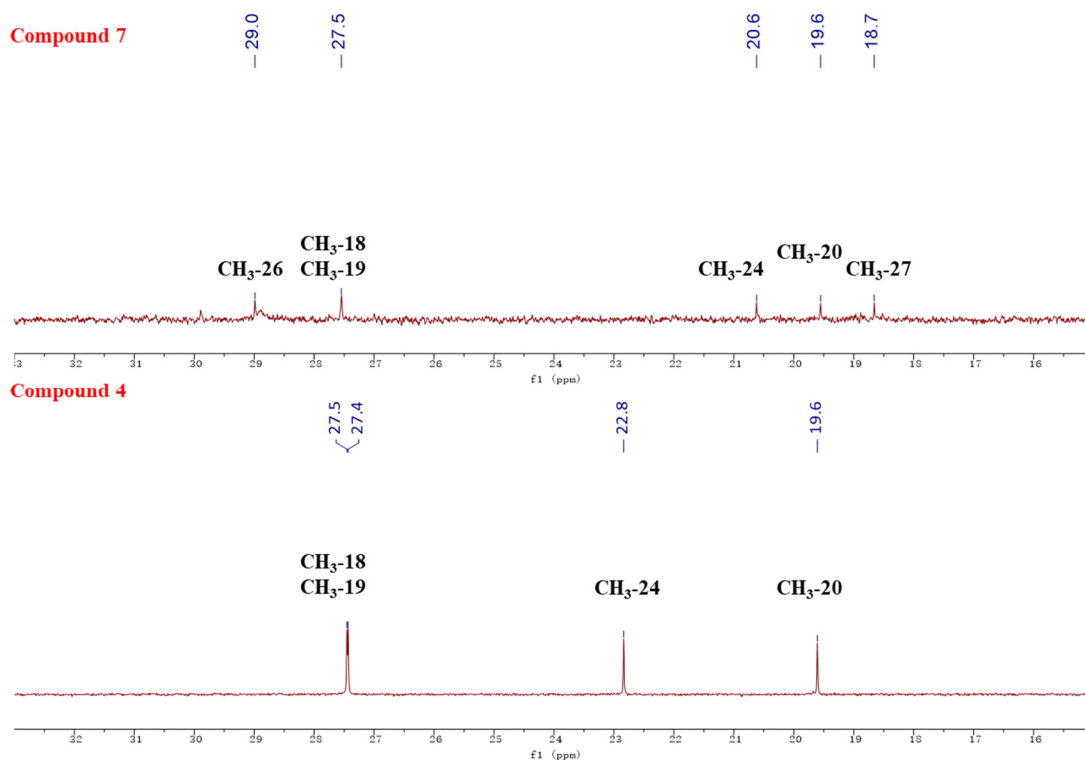

Figure S63. Enlarged HMBC spectrum of compound 7.

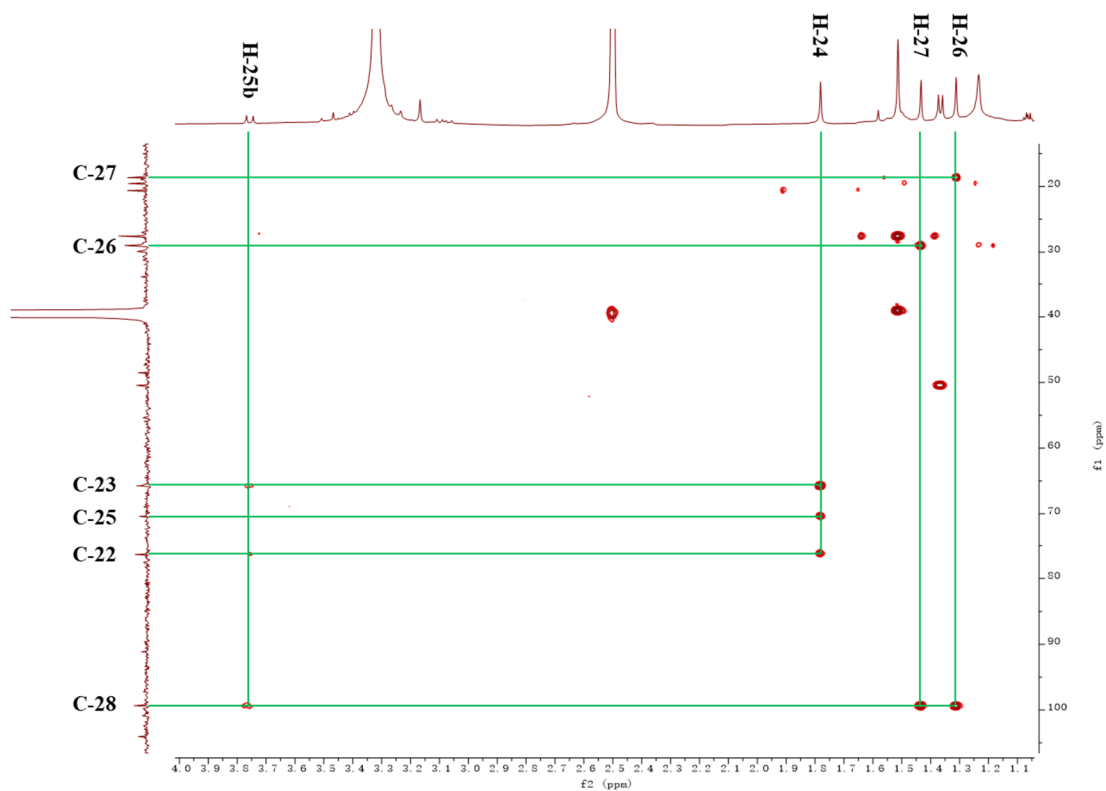

Figure S64. Enlarged NOESY spectrum of compound 7.

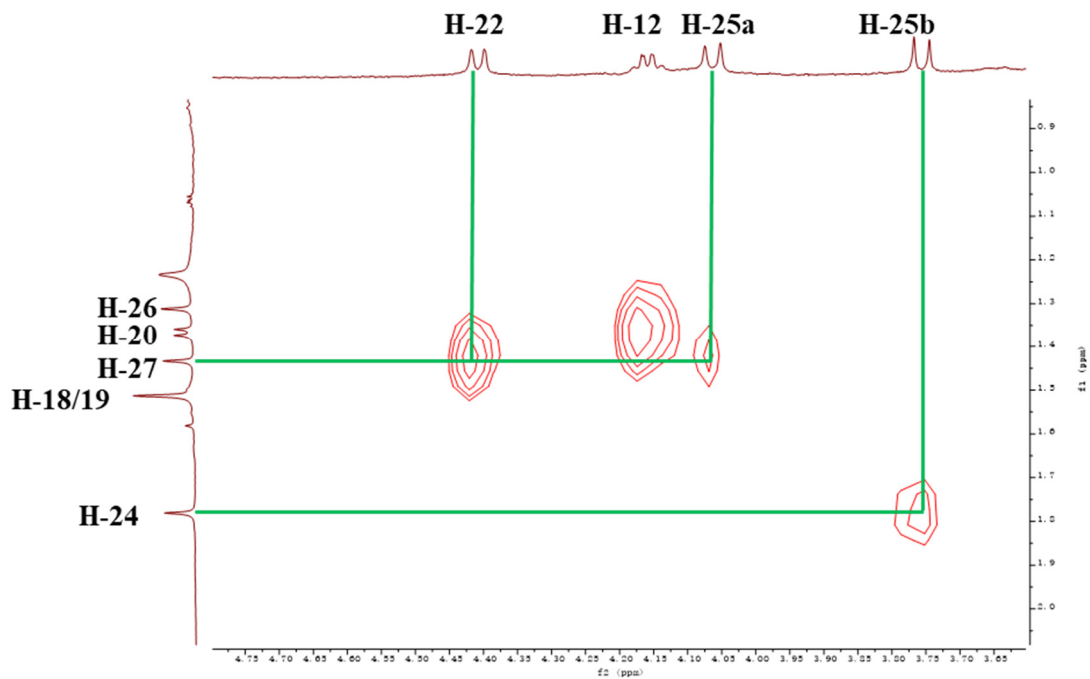

**Figure S65.**  $^1\text{H}$  NMR (500 MHz,  $\text{DMSO}-d_6$ ) spectrum of compound 7.

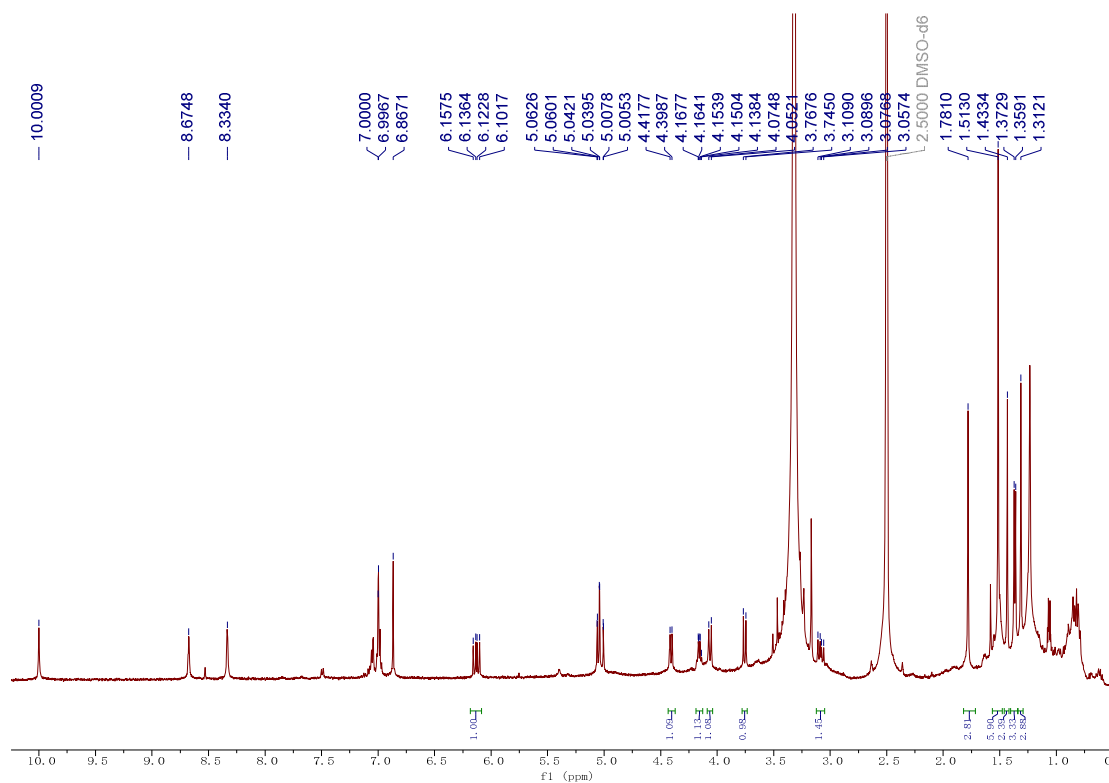

**Figure S66.**  $^{13}\text{C}$  NMR (125 MHz,  $\text{DMSO}-d_6$ ) spectrum of compound 7.

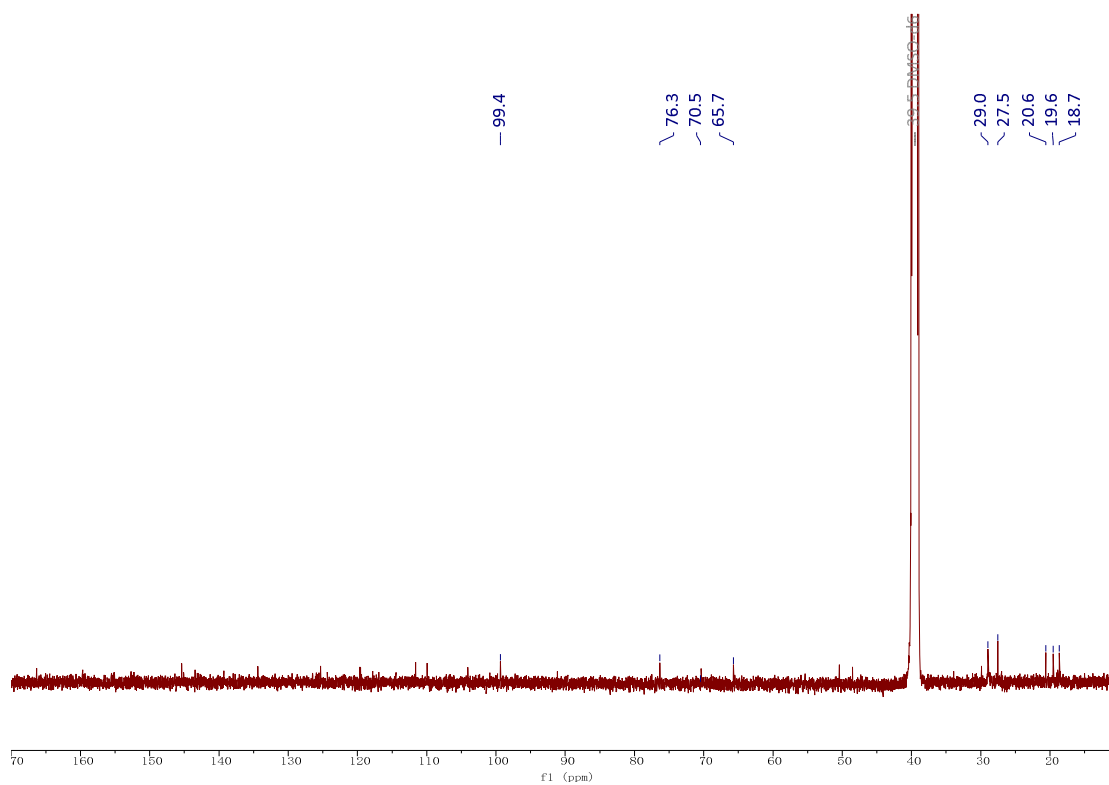

Figure S67. HSQC spectrum of compound 7.

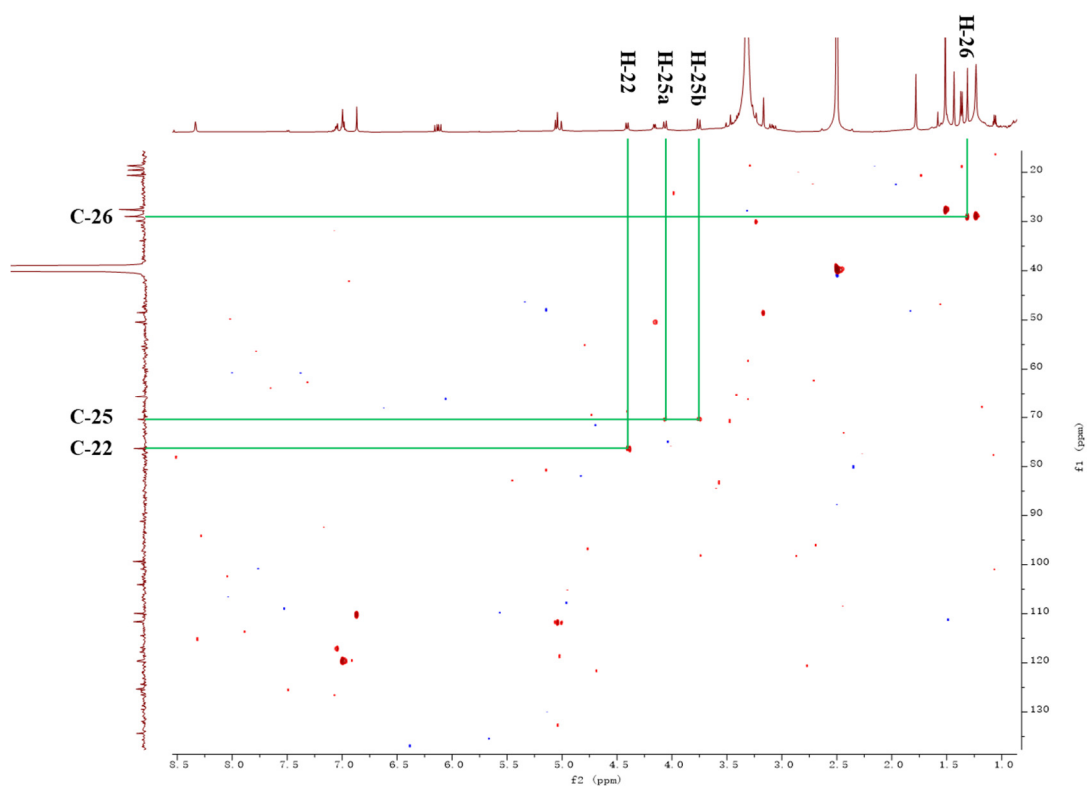

Figure S68. HMBC spectrum of compound 7.

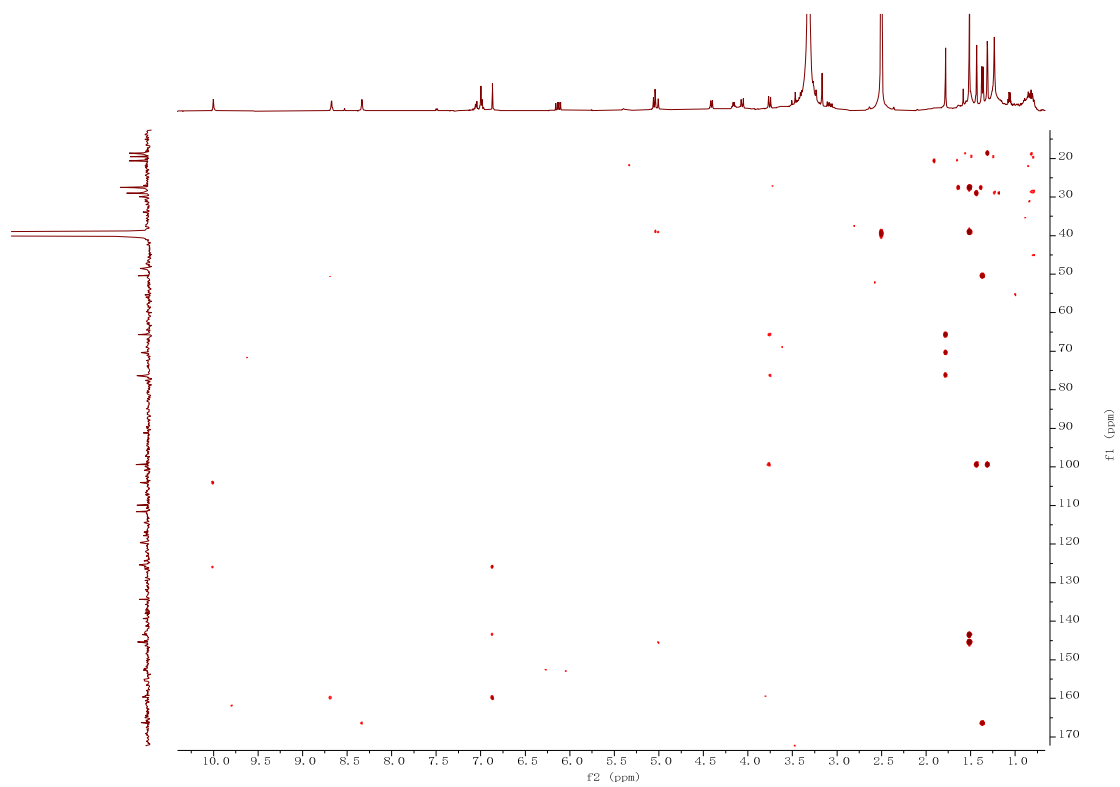

**Figure S69.** NOESY spectrum of compound 7.

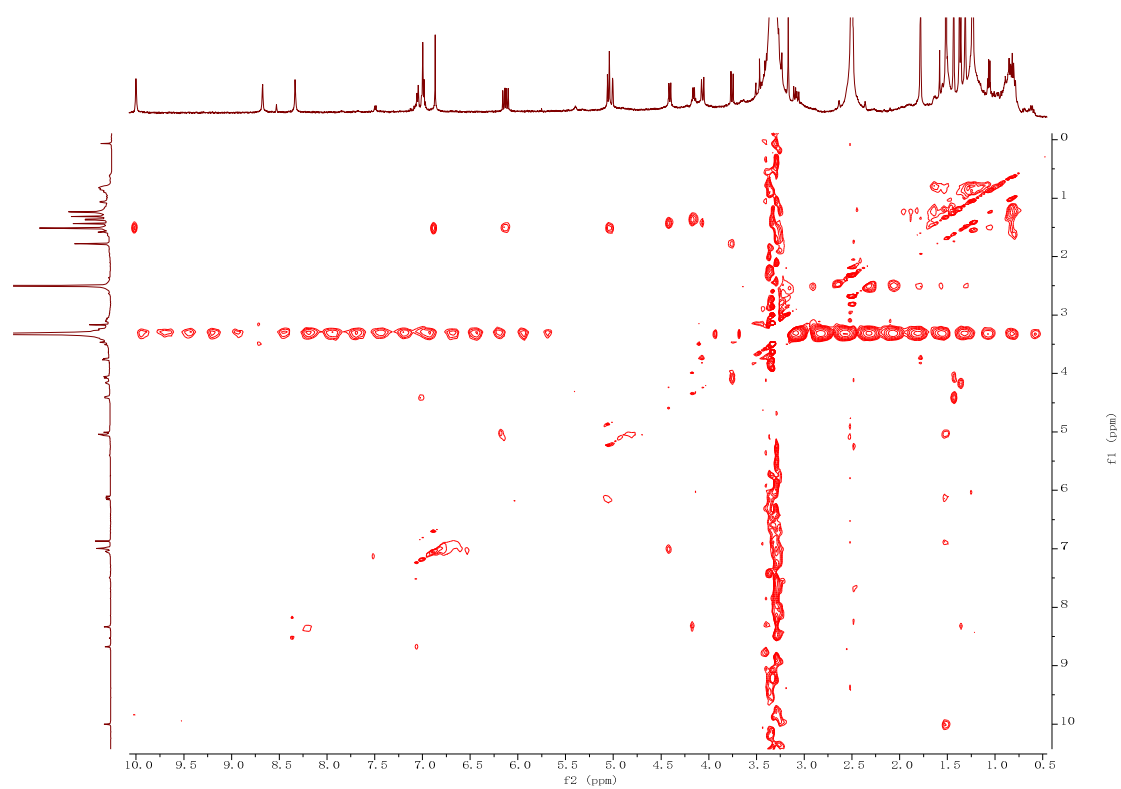



Table S1. DP4+ probability analysis of compound 2 (mPW1PW91/6-31+G(d, p) level).

| Functional |      | Solvent?     |            | Basis Set    |            | Type of Data      |          |
|------------|------|--------------|------------|--------------|------------|-------------------|----------|
| mPW1PW91   |      | PCM          |            | 6-31+G(d, p) |            | Shielding Tensors |          |
|            |      | DP4+         | 0.00%      | 0.38%        | 99.62%     | 0.00%             | —        |
| Nuclei     | sp2? | Experimental | Isomer 1   | Isomer 2     | Isomer 3   | Isomer 4          | Isomer 5 |
| C          | x    | 143.5        | 51.8386636 | 51.942005    | 51.96915   | 51.2497181        |          |
| C          | x    | 103.8        | 90.7204915 | 92.9918721   | 91.4732304 | 89.1753562        |          |
| C          | x    | 125.9        | 71.485432  | 72.0017629   | 71.3749833 | 71.7233817        |          |
| C          | x    | 116.8        | 79.8235558 | 80.3828952   | 80.3978348 | 79.5184769        |          |
| C          | x    | 119.6        | 77.7287279 | 78.0980488   | 78.6069989 | 77.8820111        |          |
| C          | x    | 121.7        | 74.7762016 | 74.8561883   | 75.010802  | 74.9109642        |          |
| C          | x    | 125.2        | 74.3547603 | 72.6945746   | 72.113262  | 73.769242         |          |
| C          | x    | 134.3        | 65.8867993 | 64.6023888   | 65.1395048 | 65.6575543        |          |
| C          | x    | 110.2        | 84.4378042 | 82.5907408   | 84.0305683 | 84.3461953        |          |
| C          | x    | 124.8        | 73.1191796 | 74.1408626   | 73.7666533 | 73.5209691        |          |
| C          | x    | 159.9        | 40.3366818 | 39.1615132   | 39.8607704 | 39.4278454        |          |
| C          |      | 50.5         | 140.310587 | 141.206967   | 140.184862 | 140.529603        |          |
| C          | x    | 166.3        | 33.3462972 | 33.6760387   | 33.4575845 | 33.3987039        |          |
| C          |      | 38.9         | 151.907812 | 151.781425   | 152.055038 | 152.403753        |          |
| C          | x    | 145.1        | 52.3432353 | 50.7722723   | 52.8714561 | 53.7939735        |          |
| C          | x    | 111.7        | 85.2279852 | 86.2691147   | 85.6390444 | 86.0249954        |          |
| C          |      | 27.4         | 169.448557 | 171.603335   | 168.968803 | 169.062849        |          |
| C          |      | 27.4         | 168.089329 | 167.641092   | 169.247044 | 168.728237        |          |
| C          |      | 19.6         | 174.322475 | 176.160457   | 174.335082 | 174.982002        |          |
| C          |      | 34           | 158.260777 | 158.309472   | 158.288694 | 157.684863        |          |
| C          |      | 74.8         | 119.790755 | 117.107817   | 117.098786 | 119.264636        |          |
| C          |      | 74.2         | 118.135653 | 118.996386   | 119.546442 | 118.269416        |          |
| C          |      | 19.1         | 177.805706 | 173.809046   | 173.917381 | 177.920105        |          |
| C          |      | 67.6         | 126.67918  | 131.63757    | 131.805373 | 126.60649         |          |
| H          | x    | 7.05         | 23.9152366 | 23.9025619   | 24.0299127 | 23.9131134        |          |
| H          | x    | 6.94         | 24.0265437 | 24.1085376   | 24.0899373 | 24.0481236        |          |
| H          | x    | 6.94         | 24.1129209 | 24.1872617   | 24.189517  | 24.128685         |          |
| H          | x    | 6.9          | 23.9628216 | 24.0501314   | 23.9521064 | 23.9546333        |          |
| H          |      | 4.16         | 27.2274609 | 27.0638161   | 27.2289109 | 27.1699612        |          |
| H          | x    | 6.09         | 24.9962902 | 24.8930568   | 24.9910864 | 25.0835124        |          |
| H          | x    | 5.06         | 25.9010196 | 26.0487052   | 25.8439787 | 25.9158772        |          |
| H          | x    | 5.05         | 25.8006602 | 25.8758917   | 25.9108965 | 25.9946065        |          |
| H          |      | 1.49         | 29.9240462 | 29.6821444   | 30.0254691 | 29.9539387        |          |
| H          |      | 1.49         | 30.2391798 | 30.3660412   | 30.1652495 | 30.2476075        |          |
| H          |      | 1.49         | 29.8486395 | 29.9817704   | 29.8161691 | 29.8130073        |          |
| H          |      | 1.49         | 29.851849  | 29.753197    | 30.2535647 | 30.2325783        |          |
| H          |      | 1.49         | 30.24551   | 30.0077642   | 29.824858  | 29.9755997        |          |
| H          |      | 1.49         | 29.7699658 | 30.0220694   | 29.8339989 | 29.7123325        |          |
| H          |      | 1.37         | 30.1227543 | 30.2553353   | 29.7691759 | 29.7520675        |          |
| H          |      | 1.37         | 30.140022  | 30.3123509   | 30.1423697 | 30.1961131        |          |
| H          |      | 1.37         | 29.7578552 | 29.69268     | 30.1047857 | 30.1492898        |          |
| H          |      | 3.25         | 28.915272  | 28.5092628   | 28.4945056 | 28.8939923        |          |
| H          |      | 2.76         | 28.0662182 | 28.4408876   | 28.6948473 | 28.0248001        |          |
| H          |      | 3.7          | 27.130891  | 27.452943    | 27.5457912 | 27.0961171        |          |
| H          |      | 1.12         | 30.6733066 | 29.7512454   | 29.7301626 | 30.6207949        |          |
| H          |      | 1.12         | 30.5271427 | 30.5769952   | 30.6160341 | 29.9496672        |          |
| H          |      | 1.12         | 29.9345811 | 30.2234885   | 30.2037262 | 30.5280683        |          |
| H          |      | 3.43         | 27.5801144 | 28.1272263   | 27.3830356 | 27.5863057        |          |
| H          |      | 3.43         | 27.6729044 | 27.8031135   | 27.7231963 | 27.5573394        |          |

Table S2. DP4+ probability analysis of compound 3 (mPW1PW91/6-31+G(d, p) level).

| Functional<br>mPW1PW91 |      | Solvent?<br>PCM |            | Basis Set<br>6-31+G (d, p) |            | Type of Data<br>Shielding Tensors |          |
|------------------------|------|-----------------|------------|----------------------------|------------|-----------------------------------|----------|
|                        |      | DP4+            | 0.00%      | 3.00%                      | 95.91%     | 1.09%                             | -        |
| Nuclei                 | sp2? | Experiment      | Isomer 1   | Isomer 2                   | Isomer 3   | Isomer 4                          | Isomer 5 |
| C                      | x    | 143.6           | 51.5097674 | 51.4078495                 | 51.4186336 | 52.106997                         |          |
| C                      | x    | 104.2           | 89.1859653 | 90.1692001                 | 90.3230941 | 90.3546859                        |          |
| C                      | x    | 126.1           | 71.0011924 | 70.8040828                 | 71.3094814 | 71.6299773                        |          |
| C                      | x    | 117.3           | 79.6060935 | 79.3540908                 | 79.8976343 | 79.6087482                        |          |
| C                      | x    | 119.5           | 77.6223736 | 78.2049235                 | 78.0279965 | 78.1417713                        |          |
| C                      | x    | 121.3           | 73.6868433 | 75.4398996                 | 75.4303318 | 73.9884158                        |          |
| C                      | x    | 122.6           | 74.9826265 | 74.6776057                 | 74.178389  | 75.6665042                        |          |
| C                      | x    | 133.9           | 65.5796894 | 65.3030369                 | 65.2423812 | 65.6786562                        |          |
| C                      | x    | 110.1           | 84.9694731 | 84.2375814                 | 84.0625539 | 84.9597906                        |          |
| C                      | x    | 125.2           | 72.4625355 | 73.9810307                 | 73.3974881 | 73.0286133                        |          |
| C                      | x    | 159.8           | 39.8508536 | 39.4310652                 | 39.6327397 | 39.4154573                        |          |
| C                      |      | 50.6            | 139.108387 | 140.884014                 | 140.92155  | 140.666633                        |          |
| C                      | x    | 166.4           | 32.902641  | 33.4465009                 | 33.6469913 | 33.5156638                        |          |
| C                      |      | 39              | 151.286557 | 152.174569                 | 151.961203 | 151.897633                        |          |
| C                      | x    | 145.2           | 54.0626186 | 51.246986                  | 52.5916096 | 53.5450179                        |          |
| C                      | x    | 111.7           | 84.9005454 | 85.3882208                 | 85.027459  | 85.2144998                        |          |
| C                      |      | 27.6            | 168.739737 | 168.347337                 | 169.030072 | 169.394297                        |          |
| C                      |      | 27.5            | 166.726261 | 169.880367                 | 168.494833 | 167.11384                         |          |
| C                      |      | 19.8            | 172.883515 | 175.543575                 | 175.594278 | 175.299109                        |          |
| C                      |      | 33.8            | 155.952963 | 156.154338                 | 156.599329 | 156.613256                        |          |
| C                      |      | 66.9            | 114.891393 | 119.60513                  | 119.814601 | 115.326356                        |          |
| C                      |      | 74.2            | 117.18842  | 117.848366                 | 117.834332 | 117.694844                        |          |
| C                      |      | 21              | 176.45628  | 178.916054                 | 179.093942 | 177.143724                        |          |
| C                      |      | 67.5            | 125.169721 | 126.4838                   | 126.302857 | 125.737449                        |          |
|                        |      |                 |            |                            |            |                                   |          |
| H                      | x    | 7.09            | 23.7942208 | 23.941482                  | 23.9116187 | 23.8933589                        |          |
| H                      | x    | 6.99            | 23.9370573 | 24.0196821                 | 24.0311279 | 24.0560603                        |          |
| H                      | x    | 7               | 23.9599206 | 24.1266244                 | 24.0794407 | 24.110067                         |          |
| H                      | x    | 6.88            | 23.8028517 | 23.9904471                 | 23.9294121 | 23.9040008                        |          |
| H                      |      | 4.14            | 27.170209  | 27.1125181                 | 27.1278105 | 27.1453788                        |          |
| H                      | x    | 6.11            | 25.0220641 | 24.9368016                 | 24.9819495 | 25.0348375                        |          |
| H                      | x    | 5.04            | 25.859267  | 25.9437073                 | 25.8252368 | 25.9004831                        |          |
| H                      | x    | 5.05            | 25.7829311 | 25.8322744                 | 25.8938267 | 25.9612471                        |          |
| H                      |      | 1.5             | 29.7256622 | 29.8389564                 | 29.8129145 | 29.9038653                        |          |
| H                      |      | 1.5             | 30.1122629 | 29.8532851                 | 30.2593649 | 30.1836405                        |          |
| H                      |      | 1.5             | 29.7951421 | 30.2569389                 | 29.8597624 | 29.8021514                        |          |
| H                      |      | 1.5             | 29.8240103 | 29.8950565                 | 30.2248515 | 30.2658449                        |          |
| H                      |      | 1.5             | 30.0995611 | 29.8675952                 | 29.9541856 | 29.8902197                        |          |
| H                      |      | 1.5             | 29.5900842 | 30.1971066                 | 29.9012188 | 29.7322133                        |          |
| H                      |      | 1.39            | 29.9140073 | 30.201391                  | 29.7123011 | 29.7303786                        |          |
| H                      |      | 1.39            | 29.8806364 | 30.2619261                 | 30.2507909 | 30.2212625                        |          |
| H                      |      | 1.39            | 29.7274469 | 29.7005133                 | 30.1985254 | 30.18095                          |          |
| H                      |      | 3.15            | 28.5097383 | 28.6254049                 | 28.6652944 | 28.6111085                        |          |
| H                      |      | 3.67            | 27.8016374 | 27.4594928                 | 27.5045139 | 27.9053828                        |          |
| H                      |      | 4.47            | 26.5102713 | 27.5953712                 | 27.6350966 | 26.5920852                        |          |
| H                      |      | 1.28            | 30.2872501 | 29.8149178                 | 29.8216038 | 30.5614589                        |          |
| H                      |      | 1.28            | 29.7813227 | 30.1713484                 | 30.1901816 | 29.9081806                        |          |
| H                      |      | 1.28            | 30.4444082 | 30.1822099                 | 30.2106445 | 30.4118784                        |          |
| H                      |      | 3.57            | 27.3170547 | 27.54234                   | 28.0016173 | 27.506387                         |          |
| H                      |      | 3.57            | 27.4199914 | 27.9952557                 | 27.5257023 | 27.4218249                        |          |

Table S3. DP4+ probability analysis of compound 4 (mPW1PW91/6-31+G(d, p) level).

| Functional<br>mPW1PW91 |      | Solvent?<br>PCM |            | Basis Set<br>6-31+G(d,p) |            | Type of Data<br>Shielding Tensors |          |
|------------------------|------|-----------------|------------|--------------------------|------------|-----------------------------------|----------|
|                        |      | DP4+            | 0.00%      | 0.86%                    | 99.14%     | 0.00%                             | -        |
| Nuclei                 | sp2? | Experiment      | Isomer 1   | Isomer 2                 | Isomer 3   | Isomer 4                          | Isomer 5 |
| C                      | x    | 143.5           | 51.4165954 | 52.4250528               | 51.9382329 | 51.0305761                        |          |
| C                      | x    | 104             | 91.8812043 | 93.1759889               | 91.4575456 | 91.6799047                        |          |
| C                      | x    | 126             | 71.170289  | 72.0638738               | 71.6118975 | 71.8979525                        |          |
| C                      | x    | 117             | 79.9252163 | 79.9522164               | 80.0848993 | 79.5240436                        |          |
| C                      | x    | 119.7           | 77.7766143 | 78.4244751               | 77.8284114 | 78.5067977                        |          |
| C                      | x    | 121.9           | 74.1597627 | 74.6581274               | 74.870796  | 74.4356763                        |          |
| C                      | x    | 123.8           | 73.0634901 | 72.6354693               | 72.6786032 | 73.8514978                        |          |
| C                      | x    | 134.2           | 65.0382498 | 65.1353141               | 65.2278177 | 64.7790458                        |          |
| C                      | x    | 110             | 83.1105597 | 84.3615966               | 84.3829949 | 85.2005312                        |          |
| C                      | x    | 125.1           | 74.70987   | 72.6450862               | 74.0119729 | 74.0871338                        |          |
| C                      | x    | 159.8           | 38.6051629 | 39.4468951               | 40.503148  | 38.701521                         |          |
| C                      |      | 50.5            | 141.184375 | 141.116074               | 139.459195 | 141.194031                        |          |
| C                      | x    | 166.4           | 33.5231571 | 33.6797135               | 33.2742286 | 33.4661147                        |          |
| C                      |      | 38.9            | 152.058389 | 151.860883               | 151.99495  | 151.880139                        |          |
| C                      | x    | 145.1           | 50.3229216 | 53.2174309               | 52.6304222 | 52.2405177                        |          |
| C                      | x    | 111.8           | 86.3786563 | 84.5745504               | 85.3864848 | 84.3942213                        |          |
| C                      |      | 27.5            | 170.549411 | 167.524369               | 170.047465 | 171.397753                        |          |
| C                      |      | 27.4            | 169.256937 | 170.109166               | 168.651561 | 166.409951                        |          |
| C                      |      | 19.6            | 176.372265 | 176.173227               | 173.020451 | 176.522768                        |          |
| C                      |      | 34.2            | 158.632902 | 157.843881               | 157.762331 | 157.914792                        |          |
| C                      |      | 77.7            | 117.426459 | 113.295216               | 112.980437 | 117.979865                        |          |
| C                      |      | 74              | 97.2871928 | 97.3723827               | 97.3264919 | 97.4551892                        |          |
| C                      |      | 68.1            | 125.232148 | 129.532416               | 129.495255 | 125.237926                        |          |
| C                      |      | 22.8            | 174.806695 | 171.038073               | 170.925806 | 175.158699                        |          |
|                        |      |                 |            |                          |            |                                   |          |
| H                      | x    | 7.08            | 23.8466493 | 23.909666                | 23.9214107 | 23.889799                         |          |
| H                      | x    | 6.98            | 24.0814297 | 24.0715408               | 24.0685306 | 24.0435268                        |          |
| H                      | x    | 7               | 24.1488858 | 24.1549762               | 23.9859259 | 24.1734131                        |          |
| H                      | x    | 6.89            | 24.0980849 | 23.9190373               | 24.1407665 | 23.9308788                        |          |
| H                      |      | 4.17            | 27.0462414 | 27.0534916               | 27.3558786 | 26.9991985                        |          |
| H                      | x    | 6.1             | 24.9040707 | 24.9519575               | 24.970643  | 24.7315339                        |          |
| H                      | x    | 5.06            | 26.0493939 | 25.8604939               | 25.9511391 | 25.8011929                        |          |
| H                      | x    | 5.07            | 25.8463578 | 25.8305083               | 25.8636533 | 25.8189205                        |          |
| H                      |      | 1.5             | 29.707401  | 29.9654586               | 29.9811657 | 29.6678443                        |          |
| H                      |      | 1.5             | 30.0734824 | 30.1379693               | 30.1976843 | 30.1627381                        |          |
| H                      |      | 1.5             | 30.0787128 | 29.889605                | 29.8358771 | 29.9983024                        |          |
| H                      |      | 1.5             | 29.665238  | 29.8731393               | 29.8878713 | 30.2792243                        |          |
| H                      |      | 1.5             | 30.3094958 | 30.3032673               | 30.2202591 | 29.7489677                        |          |
| H                      |      | 1.5             | 29.8819208 | 29.8242639               | 29.8105649 | 29.945821                         |          |
| H                      |      | 1.38            | 30.2439099 | 30.2326211               | 30.0119762 | 29.6787193                        |          |
| H                      |      | 1.38            | 30.3234202 | 30.2959491               | 30.0260651 | 30.3379072                        |          |
| H                      |      | 1.38            | 29.689387  | 29.6716511               | 29.8289341 | 30.2526726                        |          |
| H                      |      | 2.93            | 28.3851685 | 28.4255317               | 28.5399329 | 28.4371255                        |          |
| H                      |      | 3.31            | 28.1893116 | 28.5601528               | 28.4370926 | 28.3334925                        |          |
| H                      |      | 3.97            | 26.8639115 | 27.3385841               | 27.3273843 | 26.9571858                        |          |
| H                      |      | 3.74            | 27.3671639 | 27.7113912               | 27.1619442 | 27.6160339                        |          |
| H                      |      | 3.75            | 27.6233343 | 27.1718937               | 27.7229194 | 27.4053032                        |          |
| H                      |      | 1.56            | 30.4838942 | 29.1988593               | 29.1957794 | 30.4463717                        |          |
| H                      |      | 1.56            | 30.9414039 | 30.0027325               | 29.8836677 | 29.6441782                        |          |
| H                      |      | 1.56            | 29.7045103 | 29.8902255               | 29.9852188 | 30.7289172                        |          |

**Table S4.** The calculated shielding tensors of each conformer (>2%) for isomer **2a**.

| no. C | calcd. shielding tensors of C for each conformer |          |          |          |          |          |          |          |
|-------|--------------------------------------------------|----------|----------|----------|----------|----------|----------|----------|
|       | 2a-1                                             | 2a-2     | 2a-3     | 2a-4     | 2a-5     | 2a-6     | 2a-7     | 2a-8     |
| 2     | 51.9468                                          | 53.6952  | 51.2111  | 51.4672  | 50.2789  | 53.275   | 50.0626  | 50.0542  |
| 3     | 92.7492                                          | 93.5077  | 88.2359  | 86.5681  | 91.465   | 91.5601  | 88.7655  | 88.7626  |
| 3a    | 72.5496                                          | 71.119   | 72.3796  | 69.3762  | 73.2043  | 71.3219  | 69.5705  | 69.572   |
| 4     | 79.4799                                          | 80.2963  | 80.254   | 79.5771  | 79.5889  | 79.1669  | 79.8968  | 79.8905  |
| 5     | 77.0766                                          | 77.8336  | 77.2037  | 78.6136  | 77.6038  | 78.0424  | 78.5049  | 78.5012  |
| 6     | 74.6311                                          | 74.649   | 74.9709  | 74.7571  | 74.9918  | 74.4446  | 75.0395  | 75.0421  |
| 7     | 74.9774                                          | 74.6491  | 73.3548  | 74.1198  | 73.8846  | 75.2051  | 74.3241  | 74.3203  |
| 7a    | 67.0847                                          | 65.3518  | 65.4231  | 65.841   | 65.3449  | 65.7257  | 65.8955  | 65.8916  |
| 8     | 84.9448                                          | 83.662   | 85.5817  | 84.5219  | 81.8602  | 86.5385  | 84.8234  | 84.8141  |
| 9     | 73.6988                                          | 71.6177  | 72.6061  | 73.8561  | 74.0571  | 71.8672  | 74.4919  | 74.4908  |
| 10    | 41.4141                                          | 40.9395  | 40.4664  | 38.2505  | 41.3722  | 39.7031  | 38.561   | 38.554   |
| 12    | 139.4526                                         | 141.0848 | 139.133  | 141.4667 | 139.3183 | 141.2407 | 141.4094 | 141.4126 |
| 13    | 33.3181                                          | 33.8245  | 32.8569  | 33.143   | 33.3686  | 33.6041  | 33.28    | 33.2768  |
| 15    | 152.0741                                         | 150.4212 | 152.5496 | 152.2847 | 152.3201 | 151.5974 | 152.903  | 152.9032 |
| 16    | 52.3114                                          | 50.9652  | 55.4978  | 57.0284  | 48.5202  | 50.0093  | 49.2225  | 49.2228  |
| 17    | 82.3835                                          | 85.1775  | 86.1474  | 84.989   | 87.0654  | 86.55    | 87.7571  | 87.7588  |
| 18    | 172.6073                                         | 167.5766 | 169.8312 | 167.9276 | 167.3544 | 167.3592 | 171.7289 | 171.7303 |
| 19    | 165.634                                          | 167.9008 | 167.1978 | 169.9065 | 171.9455 | 169.3732 | 167.5424 | 167.541  |
| 20    | 172.4491                                         | 175.1084 | 172.434  | 176.898  | 172.5946 | 177.0106 | 176.6145 | 176.6265 |
| 21    | 159.146                                          | 159.0676 | 157.7115 | 157.9651 | 157.1    | 157.456  | 157.6369 | 157.6412 |
| 22    | 121.2344                                         | 119.449  | 119.3315 | 119.4972 | 119.0581 | 119.7768 | 119.3068 | 119.3028 |
| 23    | 117.868                                          | 118.0574 | 118.2915 | 118.3018 | 118.1293 | 118.5068 | 118.2066 | 118.2096 |
| 24    | 177.5928                                         | 177.831  | 178.0356 | 177.7481 | 177.9844 | 177.8464 | 177.7094 | 177.7092 |
| 25    | 127.168                                          | 126.6971 | 126.6796 | 126.2731 | 126.3597 | 126.9624 | 126.3326 | 126.3342 |

| no. H | calcd. shielding tensors of H for each conformer |         |         |         |         |         |         |         |
|-------|--------------------------------------------------|---------|---------|---------|---------|---------|---------|---------|
|       | 2a-1                                             | 2a-2    | 2a-3    | 2a-4    | 2a-5    | 2a-6    | 2a-7    | 2a-8    |
| 4     | 23.7727                                          | 23.9751 | 23.8393 | 24.0698 | 23.8354 | 23.965  | 24.0704 | 24.0704 |
| 5     | 23.9793                                          | 24.0097 | 24.0485 | 24.0484 | 24.0173 | 24.0789 | 24.084  | 24.084  |
| 6     | 24.0828                                          | 24.1217 | 24.1034 | 24.1467 | 24.0642 | 24.1339 | 24.1738 | 24.1738 |
| 8     | 23.8741                                          | 23.9578 | 23.8895 | 23.9917 | 24.1091 | 23.87   | 24.1367 | 24.1364 |
| 12    | 27.3163                                          | 27.2455 | 27.3898 | 26.9769 | 27.3381 | 27.103  | 27.0314 | 27.0315 |
| 16    | 24.8937                                          | 24.9245 | 25.2457 | 25.1126 | 24.9705 | 25.1457 | 24.749  | 24.7488 |
| 17    | 25.6322                                          | 25.8601 | 26.0152 | 25.8504 | 26.1395 | 26.0837 | 26.1057 | 26.1056 |
| 17    | 25.7122                                          | 25.6495 | 25.8908 | 25.8918 | 25.9038 | 25.8054 | 25.9298 | 25.9299 |
| 18    | 29.5907                                          | 30.2301 | 29.8312 | 30.251  | 30.2761 | 30.0257 | 29.1925 | 29.1924 |
| 18    | 30.4616                                          | 30.1077 | 30.2876 | 30.1621 | 29.9631 | 30.0488 | 30.4982 | 30.4985 |
| 18    | 30.2333                                          | 29.7706 | 29.6458 | 29.7455 | 29.7446 | 29.6577 | 29.8625 | 29.8626 |
| 19    | 30.069                                           | 29.7826 | 29.8017 | 29.5854 | 30.1038 | 29.7209 | 29.7634 | 29.7636 |
| 19    | 30.0477                                          | 30.4208 | 30.1605 | 30.3666 | 30.5704 | 30.4066 | 29.7855 | 29.7852 |

|    |         |         |         |         |         |         |         |         |
|----|---------|---------|---------|---------|---------|---------|---------|---------|
| 19 | 29.6203 | 29.6296 | 30.262  | 29.7667 | 29.4026 | 29.7513 | 30.0716 | 30.0718 |
| 20 | 29.9971 | 30.2254 | 29.9858 | 30.2593 | 29.9871 | 30.248  | 30.2935 | 30.2931 |
| 20 | 29.9652 | 30.241  | 29.9642 | 30.3412 | 29.9627 | 30.3642 | 30.3861 | 30.386  |
| 20 | 29.8143 | 29.7017 | 29.8484 | 29.6749 | 29.8458 | 29.6408 | 29.6919 | 29.692  |
| 21 | 28.9172 | 28.906  | 28.992  | 28.86   | 28.9502 | 28.8999 | 28.8548 | 28.8552 |
| 21 | 28.164  | 28.1559 | 27.9888 | 27.9879 | 27.9799 | 28.105  | 27.9661 | 27.9664 |
| 22 | 27.1848 | 27.2049 | 27.0564 | 27.1212 | 27.0396 | 27.1277 | 27.0899 | 27.0907 |
| 24 | 30.7056 | 30.6951 | 30.6502 | 30.6429 | 30.6922 | 30.6621 | 30.618  | 30.618  |
| 24 | 30.5137 | 30.5222 | 30.5444 | 30.5195 | 30.5365 | 30.5636 | 30.5192 | 30.5193 |
| 24 | 29.9019 | 29.9431 | 29.946  | 29.9372 | 29.9536 | 29.9425 | 29.9408 | 29.9407 |
| 25 | 27.6617 | 27.5894 | 27.5265 | 27.5571 | 27.5596 | 27.5732 | 27.5229 | 27.5228 |
| 25 | 27.7861 | 27.717  | 27.5447 | 27.6587 | 27.6356 | 27.6361 | 27.6131 | 27.6128 |

**Table S5.** The calculated shielding tensors of each conformer (>2%) for isomer **2b**.

| no. C | calcd. shielding tensors of C for each conformer |          |          |          |          |          |          |
|-------|--------------------------------------------------|----------|----------|----------|----------|----------|----------|
|       | 2b-1                                             | 2b-2     | 2b-3     | 2b-4     | 2b-5     | 2b-6     | 2b-7     |
| 2     | 51.4005                                          | 53.4764  | 53.1376  | 51.233   | 52.2517  | 52.2489  | 52.2149  |
| 3     | 93.2999                                          | 92.4854  | 91.5884  | 92.7973  | 93.3348  | 93.3305  | 93.523   |
| 3a    | 71.8472                                          | 71.7773  | 72.6953  | 71.8956  | 73.0956  | 73.0942  | 72.3218  |
| 4     | 80.3954                                          | 80.4313  | 80.1867  | 80.9246  | 80.2438  | 80.2448  | 80.0513  |
| 5     | 78.1947                                          | 77.6473  | 77.9752  | 78.1162  | 78.2108  | 78.2102  | 78.3918  |
| 6     | 75.3559                                          | 74.1377  | 73.9644  | 74.1607  | 73.8634  | 73.8637  | 73.991   |
| 7     | 71.8294                                          | 73.8614  | 73.9664  | 74.0958  | 75.0994  | 75.0978  | 73.8772  |
| 7a    | 64.9693                                          | 64.3221  | 63.2477  | 64.6228  | 63.8673  | 63.8653  | 64.7245  |
| 8     | 81.5137                                          | 84.5224  | 84.4832  | 85.0853  | 83.8649  | 83.8684  | 83.1967  |
| 9     | 74.9293                                          | 73.5865  | 71.1125  | 74.2567  | 71.3328  | 71.329   | 76.8435  |
| 10    | 38.5865                                          | 40.715   | 40.5059  | 38.9727  | 39.4413  | 39.4389  | 38.5905  |
| 12    | 141.4873                                         | 140.3862 | 140.5895 | 141.2748 | 141.1468 | 141.1476 | 141.5013 |
| 13    | 33.5849                                          | 33.786   | 34.0736  | 33.4777  | 33.917   | 33.9163  | 33.5872  |
| 15    | 151.9142                                         | 151.8555 | 150.8227 | 152.2737 | 151.2734 | 151.2745 | 152.2052 |
| 16    | 49.7173                                          | 54.1184  | 51.9524  | 51.6704  | 51.439   | 51.4363  | 49.8815  |
| 17    | 87.5986                                          | 82.3859  | 85.2933  | 83.2246  | 84.8579  | 84.8562  | 87.989   |
| 18    | 172.5504                                         | 172.5403 | 169.2769 | 165.3042 | 167.7965 | 167.7954 | 172.8233 |
| 19    | 167.8528                                         | 163.6659 | 168.8567 | 172.3036 | 168.9202 | 168.9186 | 168.3796 |
| 20    | 176.6731                                         | 174.3737 | 175.0366 | 176.5784 | 176.3686 | 176.3749 | 176.9842 |
| 21    | 157.8459                                         | 159.8378 | 159.5209 | 157.5538 | 157.7737 | 157.7744 | 158.6234 |
| 22    | 117.0865                                         | 117.4068 | 116.6916 | 116.8225 | 117.5413 | 117.5416 | 117.3338 |
| 23    | 119.2484                                         | 118.8399 | 118.7083 | 118.2603 | 118.225  | 118.2268 | 118.0171 |
| 24    | 174.2777                                         | 173.0761 | 173.1497 | 172.8995 | 172.8813 | 172.8819 | 172.9033 |
| 25    | 131.9105                                         | 130.751  | 130.9169 | 131.8695 | 131.7487 | 131.7463 | 131.9709 |

| no. H | calcd. shileding tensors of H for each conformer |         |         |         |         |         |         |
|-------|--------------------------------------------------|---------|---------|---------|---------|---------|---------|
|       | 2b-1                                             | 2b-2    | 2b-3    | 2b-4    | 2b-5    | 2b-6    | 2b-7    |
| 4     | 23.9014                                          | 23.9092 | 23.9495 | 23.9009 | 23.8644 | 23.8646 | 23.7762 |
| 5     | 24.1242                                          | 24.1053 | 24.1214 | 24.0248 | 24.0327 | 24.0327 | 24.0183 |
| 6     | 24.1554                                          | 24.2724 | 24.2829 | 24.1868 | 24.155  | 24.1549 | 24.1612 |
| 8     | 24.0936                                          | 24.0086 | 24.0145 | 23.9516 | 23.7934 | 23.7935 | 24.1099 |
| 12    | 27.0053                                          | 27.1936 | 27.2787 | 26.9979 | 27.0429 | 27.0428 | 27.0329 |
| 16    | 24.9652                                          | 24.7163 | 24.7401 | 24.7296 | 24.9172 | 24.9172 | 24.9798 |
| 17    | 26.1942                                          | 25.7187 | 25.8273 | 25.6906 | 25.9008 | 25.9008 | 26.2229 |
| 17    | 25.9338                                          | 25.767  | 25.8032 | 25.6909 | 25.721  | 25.7209 | 26.0411 |
| 18    | 29.6126                                          | 29.5005 | 30.3582 | 29.7121 | 29.5833 | 29.5831 | 29.7632 |
| 18    | 30.4156                                          | 30.484  | 30.0226 | 30.1536 | 30.3184 | 30.3185 | 30.3836 |
| 18    | 29.9439                                          | 30.1676 | 30.0324 | 30.0991 | 29.8085 | 29.8086 | 29.8471 |
| 19    | 29.6047                                          | 30.1746 | 29.8701 | 30.0774 | 29.9293 | 29.9287 | 29.5782 |
| 19    | 29.8623                                          | 30.2162 | 30.3342 | 30.4905 | 30.1052 | 30.1053 | 29.9682 |
| 19    | 30.1889                                          | 29.7121 | 29.4285 | 29.6446 | 30.2608 | 30.2606 | 30.2832 |
| 20    | 30.2854                                          | 30.159  | 30.2001 | 30.2632 | 30.2633 | 30.2636 | 30.257  |
| 20    | 30.3599                                          | 30.1238 | 30.2413 | 30.336  | 30.353  | 30.3533 | 30.3556 |
| 20    | 29.6951                                          | 29.6991 | 29.7187 | 29.6456 | 29.6585 | 29.6586 | 29.6422 |
| 21    | 28.4508                                          | 28.5939 | 28.6117 | 28.6153 | 28.6438 | 28.644  | 28.5496 |
| 21    | 28.7486                                          | 27.8857 | 27.9369 | 27.983  | 28.0341 | 28.0343 | 27.8819 |
| 22    | 27.542                                           | 27.2902 | 27.3188 | 27.3052 | 27.356  | 27.3558 | 27.2343 |
| 24    | 29.7014                                          | 29.8017 | 29.8129 | 29.8847 | 29.8886 | 29.8888 | 29.8594 |
| 24    | 30.6104                                          | 30.5162 | 30.5389 | 30.5059 | 30.5225 | 30.5226 | 30.5047 |
| 24    | 30.2026                                          | 30.2136 | 30.2462 | 30.3118 | 30.3275 | 30.3277 | 30.283  |
| 25    | 27.6903                                          | 28.7046 | 28.7386 | 29.0489 | 29.0765 | 29.0764 | 29.0805 |
| 25    | 27.3757                                          | 28.487  | 28.4864 | 28.5152 | 28.5715 | 28.5715 | 28.4756 |

**Table S6.** The calculated shielding tensors of each conformer (>2%) for isomer **2c**.

| no. C | calcd. shileding tensors of C for each conformer |          |          |          |         |          |          |          |
|-------|--------------------------------------------------|----------|----------|----------|---------|----------|----------|----------|
|       | 2c-1                                             | 2c-2     | 2c-3     | 2c-4     | 2c-5    | 2c-6     | 2c-7     | 2c-8     |
| 2     | 52.1424                                          | 52.2495  | 52.5739  | 51.3513  | 52.4005 | 51.2141  | 51.2142  | 50.897   |
| 3     | 90.6843                                          | 93.8282  | 89.721   | 93.6284  | 91.7678 | 90.5926  | 90.5912  | 88.6252  |
| 3a    | 70.743                                           | 71.9117  | 72.5414  | 72.4371  | 70.2074 | 71.4397  | 71.4377  | 69.0592  |
| 4     | 80.3107                                          | 80.7891  | 80.6546  | 80.4262  | 79.679  | 80.1416  | 80.1429  | 80.33    |
| 5     | 79.2844                                          | 78.4643  | 77.8424  | 77.9555  | 79.7751 | 77.8854  | 77.8845  | 79.2221  |
| 6     | 74.9091                                          | 74.9475  | 75.3143  | 75.1189  | 74.3468 | 75.3347  | 75.3341  | 74.9872  |
| 7     | 71.595                                           | 72.3776  | 71.6678  | 72.4523  | 72.2542 | 72.5091  | 72.5094  | 72.643   |
| 7a    | 66.0549                                          | 64.5313  | 64.666   | 65.4619  | 65.2122 | 64.474   | 64.474   | 65.6881  |
| 8     | 83.7559                                          | 84.4061  | 84.7446  | 83.3399  | 86.3152 | 82.3085  | 82.3053  | 83.6246  |
| 9     | 74.0768                                          | 73.2488  | 72.9398  | 74.3633  | 71.4952 | 75.297   | 75.2993  | 75.3444  |
| 10    | 37.7245                                          | 41.6908  | 40.2228  | 40.86    | 39.6384 | 40.4494  | 40.4431  | 38.3502  |
| 12    | 141.5712                                         | 139.7822 | 139.0862 | 139.1987 | 140.992 | 139.1707 | 139.1704 | 141.4609 |

|    |          |          |          |          |          |          |          |          |
|----|----------|----------|----------|----------|----------|----------|----------|----------|
| 13 | 33.3652  | 33.9427  | 32.839   | 33.4548  | 33.7922  | 33.3114  | 33.309   | 33.4461  |
| 15 | 151.8289 | 152.1437 | 152.0576 | 151.6701 | 152.0153 | 152.1966 | 152.195  | 152.9691 |
| 16 | 56.2918  | 50.6786  | 56.158   | 52.2362  | 51.3546  | 49.6843  | 49.6836  | 49.6759  |
| 17 | 85.3243  | 85.7625  | 85.8368  | 83.6195  | 84.4636  | 87.1342  | 87.136   | 87.5833  |
| 18 | 170.3907 | 168.1915 | 167.8415 | 165.2761 | 168.6462 | 172.3506 | 172.3497 | 167.7909 |
| 19 | 168.2713 | 168.6099 | 170.3674 | 172.8397 | 167.4309 | 167.5411 | 167.54   | 173.223  |
| 20 | 177.0808 | 172.5179 | 172.6759 | 172.8083 | 176.3974 | 172.8191 | 172.8181 | 176.7329 |
| 21 | 158.9267 | 157.7524 | 157.9534 | 157.9729 | 158.9366 | 157.9841 | 157.9827 | 158.7107 |
| 22 | 117.0598 | 117.0616 | 116.9918 | 116.946  | 117.5725 | 117.0716 | 117.0689 | 117.2457 |
| 23 | 119.5237 | 119.6584 | 119.4347 | 119.8863 | 119.6583 | 119.167  | 119.1668 | 119.6418 |
| 24 | 173.9375 | 173.7166 | 173.9764 | 173.658  | 173.7745 | 174.4458 | 174.4453 | 173.8575 |
| 25 | 131.7013 | 131.7872 | 131.8975 | 131.8227 | 131.7479 | 131.9455 | 131.9442 | 131.8005 |

| no. H | calcd. shileding tensors of H for each conformer |         |         |         |         |         |         |         |
|-------|--------------------------------------------------|---------|---------|---------|---------|---------|---------|---------|
|       | 2c-1                                             | 2c-2    | 2c-3    | 2c-4    | 2c-5    | 2c-6    | 2c-7    | 2c-8    |
| 4     | 24.1103                                          | 24.0451 | 23.888  | 23.9227 | 24.1968 | 23.9432 | 23.9433 | 24.1218 |
| 5     | 24.0785                                          | 24.0812 | 24.0751 | 24.0883 | 24.115  | 24.1012 | 24.1011 | 24.1409 |
| 6     | 24.1675                                          | 24.2089 | 24.1549 | 24.1992 | 24.236  | 24.1889 | 24.1888 | 24.2079 |
| 8     | 23.9138                                          | 23.9381 | 23.9392 | 23.8399 | 23.8725 | 24.1049 | 24.1049 | 24.1375 |
| 12    | 27.021                                           | 27.2794 | 27.4025 | 27.3936 | 27.0337 | 27.4335 | 27.4338 | 27.0172 |
| 16    | 25.1626                                          | 24.8035 | 25.2409 | 24.804  | 24.8768 | 24.9588 | 24.9588 | 24.9192 |
| 17    | 25.8962                                          | 25.7718 | 25.9754 | 25.7597 | 25.6518 | 25.8973 | 25.8974 | 25.8766 |
| 17    | 25.848                                           | 25.8483 | 26.02   | 25.6989 | 25.7555 | 26.1835 | 26.1835 | 26.0749 |
| 18    | 30.2434                                          | 30.3373 | 29.8849 | 29.5876 | 29.4867 | 30.1815 | 30.1815 | 29.5805 |
| 18    | 30.1073                                          | 30.0944 | 30.2224 | 30.474  | 30.3122 | 29.8788 | 29.879  | 30.4204 |
| 18    | 29.8368                                          | 29.9946 | 29.5506 | 30.1074 | 29.7831 | 29.656  | 29.6561 | 29.6894 |
| 19    | 30.407                                           | 30.3391 | 30.1409 | 30.0355 | 30.0361 | 30.417  | 30.4169 | 29.9408 |
| 19    | 29.7369                                          | 29.4817 | 30.2418 | 29.6746 | 30.4236 | 29.6231 | 29.6227 | 30.1646 |
| 19    | 29.7449                                          | 29.7843 | 29.8253 | 30.0594 | 29.9541 | 29.9929 | 29.9931 | 29.4906 |
| 20    | 29.6669                                          | 29.808  | 29.8243 | 29.8437 | 29.6663 | 29.8644 | 29.8645 | 29.7207 |
| 20    | 30.3658                                          | 30.0235 | 29.9634 | 29.9704 | 30.3495 | 29.9972 | 29.997  | 30.4077 |
| 20    | 30.2842                                          | 30.0248 | 29.9724 | 29.9559 | 30.2523 | 29.9764 | 29.976  | 30.308  |
| 21    | 28.4447                                          | 28.5629 | 28.4732 | 28.5798 | 28.4645 | 28.4703 | 28.4706 | 28.4616 |
| 21    | 28.6254                                          | 28.7532 | 28.6803 | 28.7307 | 28.7191 | 28.7424 | 28.7427 | 28.5985 |
| 22    | 27.5242                                          | 27.5541 | 27.5101 | 27.5723 | 27.6114 | 27.5742 | 27.574  | 27.4857 |
| 24    | 29.7175                                          | 29.7527 | 29.7165 | 29.7595 | 29.7461 | 29.7068 | 29.7069 | 29.7148 |
| 24    | 30.6184                                          | 30.619  | 30.609  | 30.6241 | 30.619  | 30.6167 | 30.6169 | 30.5947 |
| 24    | 30.2026                                          | 30.2022 | 30.1881 | 30.2192 | 30.2328 | 30.2041 | 30.2042 | 30.1828 |
| 25    | 27.3402                                          | 27.4359 | 27.3864 | 27.4255 | 27.3368 | 27.3918 | 27.3917 | 27.3381 |
| 25    | 27.7055                                          | 27.7563 | 27.7118 | 27.7664 | 27.7096 | 27.6999 | 27.6999 | 27.7063 |

**Table S7.** The calculated shielding tensors of each conformer (>2%) for isomer **2d**.

| no. C | calcd. shielding tensors of C for each conformer |          |          |          |          |          |          |
|-------|--------------------------------------------------|----------|----------|----------|----------|----------|----------|
|       | 2d-1                                             | 2d-2     | 2d-3     | 2d-4     | 2d-5     | 2d-6     | 2d-7     |
| 2     | 51.6209                                          | 51.6279  | 50.18    | 50.1843  | 50.6076  | 50.6016  | 51.6279  |
| 3     | 90.6728                                          | 84.39    | 93.1045  | 93.1198  | 89.2544  | 89.2538  | 84.39    |
| 3a    | 73.1711                                          | 69.4677  | 73.2933  | 73.2978  | 70.4987  | 70.4937  | 69.4677  |
| 4     | 79.2293                                          | 79.635   | 79.601   | 79.6058  | 79.7818  | 79.7833  | 79.635   |
| 5     | 77.3481                                          | 78.3903  | 77.8093  | 77.8113  | 78.4168  | 78.415   | 78.3903  |
| 6     | 74.8389                                          | 74.8673  | 74.9221  | 74.9212  | 75.118   | 75.1227  | 74.8673  |
| 7     | 73.4424                                          | 74.2976  | 73.5976  | 73.599   | 74.4078  | 74.4012  | 74.2976  |
| 7a    | 65.6499                                          | 65.7781  | 65.3516  | 65.3525  | 65.9273  | 65.9234  | 65.7781  |
| 8     | 84.9854                                          | 85.4419  | 81.076   | 81.0722  | 85.0884  | 85.0857  | 85.4419  |
| 9     | 72.5101                                          | 73.7507  | 73.8304  | 73.8269  | 74.9076  | 74.9044  | 73.7507  |
| 10    | 38.6118                                          | 40.2409  | 39.4371  | 39.4326  | 40.2302  | 40.224   | 40.2409  |
| 12    | 141.5011                                         | 139.1316 | 141.3683 | 141.3666 | 139.5728 | 139.5717 | 139.1316 |
| 13    | 33.244                                           | 33.3618  | 33.644   | 33.6381  | 33.6642  | 33.6634  | 33.3618  |
| 15    | 152.5051                                         | 152.2205 | 152.1055 | 152.1058 | 153.0827 | 153.0824 | 152.2205 |
| 16    | 55.2774                                          | 57.4436  | 48.7696  | 48.7686  | 49.1846  | 49.1831  | 57.4436  |
| 17    | 85.6578                                          | 84.7706  | 87.44    | 87.4423  | 87.5925  | 87.5933  | 84.7706  |
| 18    | 170.1248                                         | 167.6962 | 166.9578 | 166.9564 | 171.5034 | 171.5065 | 167.6962 |
| 19    | 166.6202                                         | 170.21   | 171.52   | 171.5158 | 167.4351 | 167.434  | 170.21   |
| 20    | 177.0735                                         | 172.3185 | 176.386  | 176.377  | 172.5399 | 172.5352 | 172.3185 |
| 21    | 158.028                                          | 157.7652 | 157.2084 | 157.2041 | 157.5459 | 157.5469 | 157.7652 |
| 22    | 119.5698                                         | 119.4077 | 119.1909 | 119.1883 | 119.1876 | 119.181  | 119.4077 |
| 23    | 118.1234                                         | 118.3669 | 118.189  | 118.1892 | 118.2997 | 118.2997 | 118.3669 |
| 24    | 177.9581                                         | 177.7248 | 178.0781 | 178.079  | 177.7183 | 177.718  | 177.7248 |
| 25    | 126.6871                                         | 126.3829 | 126.576  | 126.5747 | 126.4664 | 126.4655 | 126.3829 |

| no. H | calcd. shielding tensors of H for each conformer |         |         |         |         |         |         |
|-------|--------------------------------------------------|---------|---------|---------|---------|---------|---------|
|       | 2d-1                                             | 2d-2    | 2d-3    | 2d-4    | 2d-5    | 2d-6    | 2d-7    |
| 4     | 23.7799                                          | 24.0734 | 23.8523 | 23.8526 | 24.0269 | 24.027  | 24.0734 |
| 5     | 24.0321                                          | 24.0582 | 24.0385 | 24.0385 | 24.0553 | 24.0554 | 24.0582 |
| 6     | 24.1079                                          | 24.1542 | 24.0833 | 24.0835 | 24.151  | 24.151  | 24.1542 |
| 8     | 23.8274                                          | 23.9815 | 24.0446 | 24.0448 | 24.1144 | 24.1142 | 23.9815 |
| 12    | 27.0159                                          | 27.3762 | 27.0106 | 27.0109 | 27.3815 | 27.3826 | 27.3762 |
| 16    | 25.2277                                          | 25.1126 | 24.951  | 24.9511 | 24.7897 | 24.7897 | 25.1126 |
| 17    | 25.906                                           | 25.9603 | 25.882  | 25.8816 | 25.8935 | 25.8938 | 25.9603 |
| 17    | 25.9615                                          | 25.8465 | 26.1833 | 26.184  | 26.1142 | 26.1146 | 25.8465 |
| 18    | 30.2984                                          | 29.7656 | 29.4132 | 29.4132 | 30.0978 | 30.098  | 29.7656 |
| 18    | 30.1903                                          | 30.3449 | 30.5257 | 30.5256 | 29.8224 | 29.822  | 30.3449 |
| 18    | 29.8596                                          | 29.5883 | 30.1163 | 30.1168 | 29.8007 | 29.8006 | 29.5883 |
| 19    | 30.3218                                          | 30.1755 | 29.9453 | 29.9452 | 30.531  | 30.531  | 30.1755 |
| 19    | 29.8726                                          | 30.2647 | 30.2688 | 30.2691 | 29.2071 | 29.207  | 30.2647 |



|    |         |         |         |         |         |         |         |
|----|---------|---------|---------|---------|---------|---------|---------|
| 19 | 29.645  | 29.7444 | 29.6595 | 29.66   | 29.9132 | 29.9128 | 29.7444 |
| 20 | 29.6414 | 29.8834 | 29.6705 | 29.6702 | 29.9076 | 29.9085 | 29.8834 |
| 20 | 30.3498 | 29.9625 | 30.3373 | 30.3369 | 30.0396 | 30.0392 | 29.9625 |
| 20 | 30.2679 | 29.9581 | 30.2684 | 30.2684 | 30.0487 | 30.0484 | 29.9581 |
| 21 | 28.9566 | 28.8617 | 28.9851 | 28.9849 | 28.8591 | 28.8593 | 28.8617 |
| 21 | 27.991  | 27.9797 | 27.9705 | 27.9701 | 27.9688 | 27.9691 | 27.9797 |
| 22 | 27.0656 | 27.0952 | 27.0232 | 27.023  | 27.0858 | 27.0873 | 27.0952 |
| 24 | 30.6527 | 30.6427 | 30.6833 | 30.6831 | 30.6258 | 30.6258 | 30.6427 |
| 24 | 29.9484 | 29.9345 | 29.9638 | 29.9637 | 29.9428 | 29.9429 | 29.9345 |
| 24 | 30.5365 | 30.5259 | 30.5306 | 30.5306 | 30.5329 | 30.5328 | 30.5259 |
| 25 | 27.5549 | 27.6399 | 27.5882 | 27.5884 | 27.6016 | 27.6013 | 27.6399 |
| 25 | 27.523  | 27.5497 | 27.5434 | 27.5432 | 27.5264 | 27.5262 | 27.5497 |

**Table S8.** The calculated shielding tensors of each conformer (>2%) for isomer **3a**.

| no. C | calcd. shielding tensors of C for each conformer |          |          |          |          |          |
|-------|--------------------------------------------------|----------|----------|----------|----------|----------|
|       | 3a-1                                             | 3a-2     | 3a-3     | 3a-4     | 3a-5     | 3a-6     |
| 2     | 52.08                                            | 52.0831  | 50.6424  | 51.78    | 52.8248  | 49.9961  |
| 3     | 88.8656                                          | 88.8689  | 92.2731  | 86.2564  | 92.4005  | 91.9162  |
| 3a    | 71.7676                                          | 71.7675  | 71.3147  | 69.0942  | 71.889   | 71.8292  |
| 4     | 79.9688                                          | 79.9724  | 80.4153  | 79.6546  | 79.2332  | 80.1507  |
| 5     | 77.656                                           | 77.6579  | 77.7638  | 78.7178  | 78.5788  | 77.935   |
| 6     | 74.0863                                          | 74.0883  | 73.7651  | 73.8413  | 73.918   | 74.2414  |
| 7     | 74.641                                           | 74.6399  | 75.587   | 75.7479  | 78.0002  | 74.8717  |
| 7a    | 65.7649                                          | 65.7615  | 66.3048  | 66.2706  | 64.9629  | 65.74    |
| 8     | 85.4699                                          | 85.469   | 84.6037  | 86.2146  | 86.646   | 82.2225  |
| 9     | 72.27                                            | 72.2655  | 73.1846  | 73.6391  | 72.3167  | 74.0959  |
| 10    | 40.3053                                          | 40.301   | 40.794   | 38.2077  | 39.4315  | 40.8764  |
| 12    | 139.0974                                         | 139.097  | 139.2315 | 141.4319 | 141.1842 | 139.2404 |
| 13    | 32.8731                                          | 32.8769  | 33.1328  | 33.0568  | 33.6579  | 33.1769  |
| 15    | 151.9838                                         | 151.984  | 152.2042 | 151.739  | 151.1975 | 152.0852 |
| 16    | 55.7643                                          | 55.7696  | 51.6205  | 57.4519  | 49.7498  | 48.6064  |
| 17    | 85.858                                           | 85.8551  | 82.1305  | 84.3639  | 86.8666  | 87.6527  |
| 18    | 170.128                                          | 170.1285 | 172.2701 | 166.9036 | 166.6537 | 167.2848 |
| 19    | 166.3853                                         | 166.3844 | 165.2619 | 169.867  | 169.2425 | 172.0173 |
| 20    | 172.4848                                         | 172.4805 | 172.4713 | 176.8663 | 177.0492 | 172.6773 |
| 21    | 156.578                                          | 156.5793 | 156.9448 | 156.659  | 156.2642 | 156.308  |
| 22    | 115.5413                                         | 115.5417 | 114.3026 | 115.6614 | 115.6463 | 115.4967 |
| 23    | 117.6026                                         | 117.6024 | 118.0509 | 117.7258 | 117.4941 | 117.4917 |
| 24    | 177.1636                                         | 177.1622 | 177.2155 | 177.1728 | 177.3598 | 177.1352 |
| 25    | 125.3611                                         | 125.3648 | 126.9581 | 125.6253 | 125.9525 | 125.0294 |

| no. H | calcd. shielding tensors of H for each conformer |         |         |         |         |         |
|-------|--------------------------------------------------|---------|---------|---------|---------|---------|
|       | 3a-1                                             | 3a-2    | 3a-3    | 3a-4    | 3a-5    | 3a-6    |
| 4     | 23.8513                                          | 23.8516 | 23.8741 | 24.0356 | 23.9297 | 23.8806 |
| 5     | 24.0275                                          | 24.0279 | 24.0438 | 24.061  | 24.0433 | 24.022  |
| 6     | 24.0252                                          | 24.0255 | 24.1042 | 24.0926 | 24.148  | 24.0198 |
| 8     | 23.9042                                          | 23.9045 | 23.849  | 23.8749 | 23.8621 | 24.1087 |
| 12    | 27.3761                                          | 27.3768 | 27.3541 | 26.976  | 27.0845 | 27.3709 |
| 16    | 25.2467                                          | 25.2464 | 24.8896 | 25.0628 | 25.1455 | 24.8924 |
| 17    | 26.0463                                          | 26.0465 | 25.6911 | 25.8235 | 26.0736 | 26.1729 |
| 17    | 25.9531                                          | 25.9536 | 25.663  | 25.9716 | 25.7804 | 25.9036 |
| 18    | 29.7674                                          | 29.7669 | 30.2193 | 29.6769 | 29.7784 | 30.0814 |
| 18    | 30.163                                           | 30.1633 | 30.1323 | 30.3249 | 30.4468 | 30.5449 |
| 18    | 30.2344                                          | 30.2344 | 29.5089 | 29.6772 | 29.724  | 29.3277 |
| 19    | 29.9463                                          | 29.946  | 29.5534 | 30.2024 | 30.0126 | 30.2034 |
| 19    | 30.2503                                          | 30.2503 | 30.4669 | 30.1341 | 30.0626 | 29.9068 |
| 19    | 29.5661                                          | 29.5658 | 30.2054 | 29.7269 | 29.6303 | 29.7579 |
| 20    | 29.9795                                          | 29.9592 | 29.9578 | 30.2642 | 30.2362 | 29.9701 |
| 20    | 29.9592                                          | 29.834  | 29.8236 | 30.3587 | 30.3598 | 29.9615 |
| 20    | 29.8334                                          | 29.9792 | 29.9724 | 29.6795 | 29.6348 | 29.8344 |
| 21    | 28.6161                                          | 28.6162 | 28.7228 | 28.5764 | 28.6107 | 28.6389 |
| 21    | 27.9159                                          | 27.9164 | 28.1138 | 27.7128 | 28.0046 | 27.8145 |
| 22    | 26.6431                                          | 26.6439 | 26.7025 | 26.4607 | 26.6459 | 26.5825 |
| 24    | 30.4131                                          | 30.4129 | 30.481  | 30.3652 | 30.3849 | 30.4023 |
| 24    | 29.8721                                          | 29.8717 | 29.9299 | 29.9824 | 29.9157 | 29.9082 |
| 24    | 30.5661                                          | 30.566  | 30.5922 | 30.5393 | 30.5955 | 30.5943 |
| 25    | 27.4046                                          | 27.4044 | 27.5546 | 27.4232 | 27.392  | 27.4086 |
| 25    | 27.5292                                          | 27.5288 | 27.5218 | 27.5038 | 27.601  | 27.5737 |

**Table S9.** The calculated shielding tensors of each conformer (>2%) for isomer **3b**.

| no. C | calcd. shielding tensors of C for each conformer |         |          |          |          |          |          |         |
|-------|--------------------------------------------------|---------|----------|----------|----------|----------|----------|---------|
|       | 3b-1                                             | 3b-2    | 3b-3     | 3b-4     | 3b-5     | 3b-6     | 3b-7     | 3b-8    |
| 2     | 50.7364                                          | 52.2733 | 51.8057  | 52.057   | 51.5219  | 51.5157  | 50.4491  | 50.449  |
| 3     | 91.1115                                          | 90.7636 | 85.7884  | 92.8305  | 88.6581  | 88.652   | 91.5759  | 91.5768 |
| 3a    | 71.0541                                          | 70.6687 | 69.4406  | 71.3359  | 69.1776  | 69.1783  | 73.0177  | 73.0166 |
| 4     | 79.3216                                          | 78.5623 | 78.635   | 80.7013  | 78.8676  | 78.8613  | 80.2113  | 80.2156 |
| 5     | 78.1424                                          | 78.3617 | 79.0345  | 78.0332  | 78.0788  | 78.0811  | 77.8391  | 77.8394 |
| 6     | 75.6414                                          | 75.0974 | 75.1152  | 75.2866  | 75.3221  | 75.3258  | 75.9964  | 75.9947 |
| 7     | 74.5422                                          | 75.7137 | 74.1806  | 74.0131  | 75.4625  | 75.4655  | 73.7679  | 73.7659 |
| 7a    | 65.4619                                          | 64.9855 | 65.6751  | 65.0761  | 65.904   | 65.9022  | 64.6919  | 64.6904 |
| 8     | 85.7835                                          | 86.4168 | 84.0307  | 83.8252  | 83.1092  | 83.1027  | 82.5994  | 82.6005 |
| 9     | 74.4837                                          | 72.2    | 74.0947  | 72.2278  | 75.3133  | 75.3183  | 74.686   | 74.6844 |
| 10    | 38.5295                                          | 39.4671 | 38.2855  | 40.9856  | 38.5278  | 38.5314  | 40.9239  | 40.9174 |
| 12    | 141.2731                                         | 141.3   | 141.4172 | 140.9244 | 141.3821 | 141.3861 | 139.2621 | 139.261 |

|    |          |          |          |          |          |          |          |          |
|----|----------|----------|----------|----------|----------|----------|----------|----------|
| 13 | 33.3154  | 33.6897  | 33.3075  | 33.8934  | 33.3839  | 33.3875  | 33.2195  | 33.2175  |
| 15 | 151.8263 | 151.9319 | 152.4786 | 151.4446 | 152.4928 | 152.4899 | 152.6199 | 152.6179 |
| 16 | 51.6237  | 50.8282  | 56.4514  | 50.9369  | 49.4554  | 49.4571  | 50.1205  | 50.1207  |
| 17 | 83.2461  | 84.4944  | 85.3933  | 84.9559  | 87.0227  | 87.0203  | 86.5406  | 86.5411  |
| 18 | 164.3951 | 168.1318 | 168.3584 | 168.1275 | 172.736  | 172.7356 | 167.3365 | 167.3388 |
| 19 | 172.3802 | 167.7865 | 169.8729 | 168.478  | 167.6996 | 167.6965 | 172.8116 | 172.8096 |
| 20 | 176.4472 | 176.7986 | 176.7427 | 174.6957 | 176.3974 | 176.4112 | 172.4783 | 172.4779 |
| 21 | 155.9399 | 155.6848 | 156.1591 | 156.7306 | 155.9079 | 155.9046 | 156.6556 | 156.6569 |
| 22 | 119.4997 | 119.4095 | 119.6442 | 120.0153 | 119.6404 | 119.6421 | 119.5419 | 119.5444 |
| 23 | 118.2663 | 117.8901 | 117.4446 | 118.253  | 117.5954 | 117.5872 | 117.7238 | 117.7263 |
| 24 | 178.6997 | 178.798  | 178.701  | 179.351  | 178.8314 | 178.8276 | 179.1632 | 179.1661 |
| 25 | 126.4256 | 126.4082 | 126.8266 | 126.1402 | 126.6094 | 126.6123 | 126.4641 | 126.4611 |

| no. H | calcd. shielding tensors of H for each conformer |         |         |         |         |         |         |         |
|-------|--------------------------------------------------|---------|---------|---------|---------|---------|---------|---------|
|       | 3b-1                                             | 3b-2    | 3b-3    | 3b-4    | 3b-5    | 3b-6    | 3b-7    | 3b-8    |
| 4     | 23.8885                                          | 24.0077 | 24.066  | 23.9744 | 24.0211 | 24.0211 | 23.7419 | 23.7424 |
| 5     | 24.029                                           | 24.0143 | 24.015  | 24.0504 | 24.0114 | 24.0115 | 24.0087 | 24.0085 |
| 6     | 24.181                                           | 24.1884 | 24.1534 | 24.0558 | 24.1951 | 24.1954 | 23.9775 | 23.9773 |
| 8     | 23.8541                                          | 23.8576 | 24.0062 | 23.9161 | 24.1398 | 24.14   | 24.1007 | 24.1006 |
| 12    | 26.984                                           | 27.0728 | 26.9858 | 27.2228 | 27.0209 | 27.0201 | 27.3718 | 27.3721 |
| 16    | 24.7695                                          | 24.8448 | 25.14   | 24.889  | 24.9861 | 24.9853 | 25.0119 | 25.0121 |
| 17    | 25.732                                           | 25.7918 | 25.879  | 25.8593 | 26.1599 | 26.1594 | 26.1218 | 26.122  |
| 17    | 25.7108                                          | 25.7052 | 25.8427 | 25.7655 | 25.8961 | 25.8967 | 26.0166 | 26.0163 |
| 18    | 30.0671                                          | 30.004  | 29.615  | 29.8231 | 29.5594 | 29.5599 | 29.9524 | 29.9529 |
| 18    | 29.4357                                          | 30.3955 | 29.7489 | 29.4749 | 30.1305 | 30.1296 | 29.7498 | 29.75   |
| 18    | 30.5181                                          | 30.0116 | 30.3644 | 30.4274 | 29.9366 | 29.9365 | 30.4161 | 30.4162 |
| 19    | 29.7287                                          | 29.4543 | 30.2615 | 30.3177 | 29.5977 | 29.5969 | 30.251  | 30.2509 |
| 19    | 30.1126                                          | 29.7613 | 29.799  | 30.0368 | 29.8856 | 29.8857 | 29.6611 | 29.6611 |
| 19    | 30.1062                                          | 30.4259 | 30.1279 | 30.0672 | 30.4427 | 30.4424 | 29.9344 | 29.9343 |
| 20    | 30.2616                                          | 30.2446 | 30.2679 | 30.1968 | 30.2789 | 30.279  | 29.9857 | 29.986  |
| 20    | 30.3617                                          | 30.3466 | 30.3425 | 30.2032 | 30.3713 | 30.3714 | 29.9656 | 29.966  |
| 20    | 29.6367                                          | 29.633  | 29.6859 | 29.6971 | 29.6703 | 29.6705 | 29.8604 | 29.8606 |
| 21    | 28.6687                                          | 28.6608 | 28.5185 | 28.7023 | 28.5478 | 28.5474 | 28.6605 | 28.6609 |
| 21    | 27.5002                                          | 27.46   | 27.3333 | 27.598  | 27.3513 | 27.3509 | 27.5341 | 27.5343 |
| 22    | 27.706                                           | 27.6211 | 27.5713 | 27.6835 | 27.4279 | 27.427  | 27.6179 | 27.6193 |
| 24    | 29.8592                                          | 29.8399 | 29.7518 | 29.8438 | 29.7718 | 29.7717 | 29.8231 | 29.8233 |
| 24    | 30.1835                                          | 30.1762 | 30.0775 | 30.2512 | 30.1091 | 30.1089 | 30.2336 | 30.2338 |
| 24    | 30.2149                                          | 30.1966 | 30.1379 | 30.235  | 30.145  | 30.1446 | 30.1763 | 30.1765 |
| 25    | 27.5732                                          | 27.5578 | 27.5293 | 27.5233 | 27.5202 | 27.5205 | 27.5462 | 27.5462 |
| 25    | 28.0794                                          | 28.0242 | 27.9354 | 28.039  | 27.9055 | 27.9049 | 28.0046 | 28.005  |

**Table S10.** The calculated shielding tensors of each conformer (>2%) for isomer **3c**.

| no. C | calcd. shileding tensors of C for each conformer |          |          |          |          |          |          |          |
|-------|--------------------------------------------------|----------|----------|----------|----------|----------|----------|----------|
|       | 3c-1                                             | 3c-2     | 3c-3     | 3c-4     | 3c-5     | 3c-6     | 3c-7     | 3c-8     |
| 2     | 51.4376                                          | 51.2199  | 50.7802  | 52.0254  | 52.7463  | 50.4582  | 50.9579  | 52.1124  |
| 3     | 92.5549                                          | 88.3401  | 92.7247  | 84.2034  | 91.1759  | 91.0928  | 91.7509  | 89.5596  |
| 3a    | 71.7568                                          | 72.0985  | 71.8021  | 69.6463  | 70.733   | 72.6254  | 70.9604  | 69.1078  |
| 4     | 80.3524                                          | 79.8979  | 80.6065  | 78.8958  | 79.2401  | 80.0076  | 79.6436  | 79.6064  |
| 5     | 78.0001                                          | 77.6965  | 77.4913  | 78.7682  | 78.359   | 77.9339  | 78.1538  | 78.2663  |
| 6     | 75.3344                                          | 75.5007  | 75.5357  | 75.2677  | 75.0923  | 75.861   | 75.6082  | 75.371   |
| 7     | 74.1227                                          | 73.3004  | 73.718   | 74.7591  | 75.5121  | 73.3269  | 74.627   | 75.3323  |
| 7a    | 64.9475                                          | 65.2521  | 65.447   | 65.4605  | 64.9618  | 64.9884  | 65.5363  | 65.8502  |
| 8     | 83.3495                                          | 85.0719  | 83.3083  | 84.7911  | 86.1071  | 81.7305  | 85.3985  | 83.0453  |
| 9     | 72.2432                                          | 72.7571  | 73.8337  | 74.5337  | 71.3578  | 74.1122  | 76.1097  | 74.9071  |
| 10    | 39.8886                                          | 38.5822  | 39.5025  | 39.9844  | 40.4394  | 38.9449  | 39.6199  | 40.8375  |
| 12    | 141.4089                                         | 141.5821 | 141.3827 | 139.1856 | 140.8919 | 141.5827 | 139.4774 | 140.5924 |
| 13    | 33.9148                                          | 33.1744  | 33.7006  | 33.3802  | 34.0481  | 33.5898  | 33.5203  | 33.9342  |
| 15    | 151.3177                                         | 152.7446 | 151.3086 | 152.6279 | 152.065  | 152.3488 | 151.5753 | 152.3372 |
| 16    | 50.8881                                          | 55.7636  | 52.6774  | 56.8472  | 50.8291  | 50.0649  | 51.6562  | 49.3129  |
| 17    | 84.945                                           | 85.5975  | 83.4822  | 85.2306  | 84.5317  | 86.5519  | 83.3883  | 87.5499  |
| 18    | 168.1403                                         | 169.8795 | 172.6632 | 168.221  | 168.2783 | 167.4377 | 164.3101 | 172.7583 |
| 19    | 168.3417                                         | 167.325  | 164.859  | 170.0193 | 167.7342 | 172.7395 | 172.4313 | 167.7592 |
| 20    | 176.5496                                         | 177.1441 | 176.6065 | 172.346  | 175.4354 | 176.8031 | 172.4292 | 174.4017 |
| 21    | 156.8024                                         | 157.0948 | 157.024  | 156.0379 | 155.6814 | 156.9745 | 156.2517 | 155.8653 |
| 22    | 119.9863                                         | 119.8683 | 119.8038 | 119.7723 | 119.4616 | 119.5194 | 120.0176 | 119.7596 |
| 23    | 118.2665                                         | 117.548  | 117.8047 | 117.3651 | 117.8786 | 117.6758 | 118.2206 | 117.5792 |
| 24    | 179.3649                                         | 179.2485 | 179.293  | 178.5639 | 178.826  | 179.3605 | 178.6136 | 178.8394 |
| 25    | 126.1362                                         | 126.1977 | 126.1828 | 126.6801 | 126.4074 | 126.3544 | 126.2485 | 126.6054 |

| no. H | calcd. shileding tensors of H for each conformer |         |         |         |         |         |         |         |
|-------|--------------------------------------------------|---------|---------|---------|---------|---------|---------|---------|
|       | 3c-1                                             | 3c-2    | 3c-3    | 3c-4    | 3c-5    | 3c-6    | 3c-7    | 3c-8    |
| 4     | 23.9329                                          | 23.7956 | 23.8379 | 24.0543 | 24.0353 | 23.7932 | 23.8922 | 24.0316 |
| 5     | 24.0846                                          | 23.9954 | 24.0444 | 24.0097 | 23.9803 | 24.0141 | 24.0501 | 24.0019 |
| 6     | 24.0727                                          | 23.9712 | 24.0543 | 24.1661 | 24.1839 | 23.9624 | 24.1525 | 24.1997 |
| 8     | 23.8699                                          | 23.852  | 23.8961 | 23.9974 | 23.9259 | 24.1199 | 23.8235 | 24.1837 |
| 12    | 27.0374                                          | 27.0301 | 27.0153 | 27.3788 | 27.1932 | 27.0408 | 27.3694 | 27.2229 |
| 16    | 24.8888                                          | 25.2793 | 24.8361 | 25.1248 | 24.8483 | 25.0522 | 24.7545 | 24.9753 |
| 17    | 25.7583                                          | 25.8806 | 25.8036 | 25.9005 | 25.7151 | 25.9612 | 25.7235 | 25.9351 |
| 17    | 25.8552                                          | 25.9526 | 25.7512 | 25.873  | 25.7972 | 26.1589 | 25.7434 | 26.2101 |
| 18    | 29.4773                                          | 30.277  | 29.6612 | 29.7515 | 30.3991 | 29.7554 | 29.3845 | 30.1289 |
| 18    | 30.4138                                          | 30.1758 | 30.0696 | 30.3487 | 30.0314 | 30.4295 | 30.5023 | 29.9196 |
| 18    | 29.8007                                          | 29.8018 | 30.1164 | 29.5907 | 30.0118 | 29.9821 | 30.0736 | 29.5527 |
| 19    | 30.0614                                          | 30.304  | 30.5093 | 30.1418 | 30.4536 | 29.9094 | 30.1095 | 30.4255 |
| 19    | 30.3211                                          | 29.8947 | 29.5574 | 30.2496 | 29.4657 | 30.2421 | 29.6991 | 29.6074 |
| 19    | 30.037                                           | 29.7055 | 30.1315 | 29.7686 | 29.7857 | 29.6345 | 30.1084 | 29.9067 |

|    |         |         |         |         |         |         |         |         |
|----|---------|---------|---------|---------|---------|---------|---------|---------|
| 20 | 29.6728 | 29.6278 | 29.6477 | 29.8955 | 29.7172 | 29.6473 | 29.8984 | 29.7249 |
| 20 | 30.351  | 30.3442 | 30.3373 | 29.9719 | 30.2453 | 30.3334 | 29.9891 | 30.1886 |
| 20 | 30.2656 | 30.2629 | 30.259  | 29.9698 | 30.2285 | 30.2667 | 30.0006 | 30.1922 |
| 21 | 28.7148 | 28.648  | 28.733  | 28.5346 | 28.6537 | 28.6901 | 28.7116 | 28.5498 |
| 21 | 27.5956 | 27.4958 | 27.5715 | 27.3386 | 27.4607 | 27.5287 | 27.5255 | 27.3533 |
| 22 | 27.6871 | 27.6461 | 27.714  | 27.4777 | 27.6124 | 27.6692 | 27.7218 | 27.4154 |
| 24 | 29.8463 | 29.8068 | 29.8239 | 29.7627 | 29.8376 | 29.8266 | 29.8802 | 29.7738 |
| 24 | 30.238  | 30.1405 | 30.2093 | 30.1442 | 30.1949 | 30.1634 | 30.2439 | 30.1471 |
| 24 | 30.2605 | 30.2398 | 30.2569 | 30.0785 | 30.1748 | 30.2735 | 30.1723 | 30.1088 |
| 25 | 28.0411 | 27.9792 | 27.9948 | 27.9217 | 28.0232 | 28.0148 | 28.1041 | 27.905  |
| 25 | 27.5235 | 27.4982 | 27.5092 | 27.5246 | 27.5577 | 27.5184 | 27.5983 | 27.5212 |

**Table S11.** The calculated shielding tensors of each conformer (>2%) for isomer **3d**.

| no. C | calcd. shielding tensors of C for each conformer |          |          |          |          |          |          |          |
|-------|--------------------------------------------------|----------|----------|----------|----------|----------|----------|----------|
|       | 3d-1                                             | 3d-2     | 3d-3     | 3d-4     | 3d-5     | 3d-6     | 3d-7     | 3d-8     |
| 2     | 52.6293                                          | 52.6292  | 51.8127  | 51.3918  | 50.4402  | 52.996   | 50.8581  | 53.0119  |
| 3     | 90.1712                                          | 90.1655  | 84.6604  | 93.042   | 93.7411  | 92.4011  | 91.7312  | 92.2093  |
| 3a    | 72.4027                                          | 72.4042  | 69.1986  | 71.6137  | 72.2954  | 71.4374  | 71.728   | 71.6348  |
| 4     | 79.6502                                          | 79.6539  | 79.6852  | 80.2012  | 79.8889  | 78.4284  | 79.071   | 79.4962  |
| 5     | 77.7236                                          | 77.7212  | 78.5336  | 77.9657  | 78.2613  | 78.7312  | 79.0083  | 78.6792  |
| 6     | 74.0617                                          | 74.0616  | 73.9424  | 73.6842  | 74.1416  | 74.0553  | 74.0074  | 73.9453  |
| 7     | 74.7619                                          | 74.7614  | 76.4498  | 75.3857  | 74.6533  | 77.5249  | 77.0495  | 78.1315  |
| 7a    | 65.5475                                          | 65.5453  | 66.2043  | 66.1512  | 65.7627  | 65.2212  | 65.4682  | 64.9769  |
| 8     | 84.7937                                          | 84.7886  | 87.0398  | 83.188   | 81.4226  | 85.9947  | 85.843   | 86.7439  |
| 9     | 72.4958                                          | 72.4907  | 73.672   | 72.8505  | 73.998   | 72.9558  | 74.1     | 73.278   |
| 10    | 38.5803                                          | 38.5767  | 40.2122  | 39.0342  | 38.8969  | 41.3602  | 40.4213  | 41.3052  |
| 12    | 141.4212                                         | 141.4246 | 139.1681 | 141.3505 | 141.45   | 139.5767 | 139.4528 | 139.3548 |
| 13    | 33.4117                                          | 33.4107  | 33.5413  | 33.6467  | 33.6444  | 33.6835  | 33.5105  | 33.5605  |
| 15    | 152.2218                                         | 152.2281 | 151.5276 | 151.6649 | 151.7146 | 151.0103 | 152.7926 | 151.3158 |
| 16    | 55.5587                                          | 55.5603  | 57.5833  | 52.5272  | 48.834   | 48.9158  | 47.2176  | 49.5882  |
| 17    | 85.4766                                          | 85.4826  | 84.3667  | 81.7396  | 87.968   | 86.4512  | 86.1005  | 86.9753  |
| 18    | 170.317                                          | 170.3178 | 166.9431 | 172.2598 | 167.1395 | 168.1381 | 169.9286 | 166.73   |
| 19    | 165.9621                                         | 165.953  | 170.1114 | 164.9026 | 171.6974 | 166.5357 | 165.2413 | 169.4491 |
| 20    | 177.0444                                         | 177.0576 | 172.3731 | 176.7215 | 176.5991 | 172.2571 | 172.5326 | 172.4121 |
| 21    | 156.6561                                         | 156.6548 | 156.7172 | 157.1524 | 156.372  | 156.0295 | 156.5482 | 155.9865 |
| 22    | 115.2847                                         | 115.286  | 115.8477 | 114.3703 | 115.3567 | 115.5721 | 115.7927 | 115.4816 |
| 23    | 117.6662                                         | 117.6654 | 117.7605 | 117.8811 | 117.4575 | 117.9642 | 117.4676 | 117.5678 |
| 24    | 177.1386                                         | 177.1382 | 177.1487 | 177.1435 | 177.1757 | 176.7417 | 177.343  | 177.3766 |
| 25    | 125.6156                                         | 125.606  | 125.4904 | 126.8332 | 125.1042 | 125.6223 | 125.5636 | 126.0281 |

| no. H | calcd. shielding tensors of H for each conformer |
|-------|--------------------------------------------------|
|-------|--------------------------------------------------|

|    | <b>3d-1</b> | <b>3d-2</b> | <b>3d-3</b> | <b>3d-4</b> | <b>3d-5</b> | <b>3d-6</b> | <b>3d-7</b> | <b>3d-8</b> |
|----|-------------|-------------|-------------|-------------|-------------|-------------|-------------|-------------|
| 4  | 23.8239     | 23.8246     | 24.0346     | 23.8861     | 23.9135     | 23.9507     | 23.9314     | 23.9064     |
| 5  | 24.0695     | 24.0697     | 24.0514     | 24.0607     | 24.0454     | 24.0696     | 23.9917     | 24.031      |
| 6  | 24.107      | 24.1068     | 24.0932     | 24.1428     | 24.0435     | 24.1806     | 24.0845     | 24.1316     |
| 8  | 23.9038     | 23.9042     | 23.8412     | 23.8727     | 24.0871     | 23.8301     | 23.9792     | 23.9085     |
| 12 | 27.0462     | 27.0459     | 27.3786     | 26.9926     | 27.0051     | 27.2992     | 27.367      | 27.3239     |
| 16 | 25.2017     | 25.2021     | 25.0434     | 24.8027     | 24.8599     | 24.8848     | 24.6215     | 25.1652     |
| 17 | 25.9667     | 25.9673     | 25.9992     | 25.7103     | 25.9101     | 25.8016     | 25.797      | 25.8057     |
| 17 | 26.0095     | 26.0103     | 25.8383     | 25.6738     | 26.1777     | 25.9443     | 26.1291     | 26.1018     |
| 18 | 30.173      | 30.1728     | 29.6442     | 29.4703     | 29.3223     | 30.1614     | 30.1136     | 29.7598     |
| 18 | 30.1472     | 30.1475     | 30.2874     | 30.0919     | 30.4739     | 30.0798     | 29.8874     | 30.4556     |
| 18 | 29.7011     | 29.7        | 29.6798     | 30.1663     | 30.0558     | 29.6489     | 29.9413     | 29.7751     |
| 19 | 30.2688     | 30.2685     | 30.1392     | 30.4379     | 29.8604     | 30.4879     | 30.5931     | 30.0831     |
| 19 | 29.9326     | 29.9332     | 30.2185     | 29.5526     | 30.1575     | 29.7325     | 29.241      | 30.042      |
| 19 | 29.5716     | 29.5703     | 29.7427     | 30.1678     | 29.6669     | 29.7627     | 30.0283     | 29.6446     |
| 20 | 29.6457     | 29.6461     | 29.8975     | 29.6437     | 29.6724     | 29.8416     | 29.8882     | 29.852      |
| 20 | 30.3565     | 30.3569     | 29.9644     | 30.3247     | 30.3394     | 30.0271     | 29.9997     | 30.0268     |
| 20 | 30.2834     | 30.2838     | 29.9777     | 30.252      | 30.2726     | 30.0505     | 30.0276     | 30.0325     |
| 21 | 28.608      | 28.6082     | 28.5648     | 28.6971     | 28.6373     | 28.5981     | 28.5379     | 28.6301     |
| 21 | 27.9518     | 27.9514     | 27.6963     | 28.0651     | 27.8567     | 27.8051     | 27.7752     | 28.0828     |
| 22 | 26.6343     | 26.6338     | 26.4281     | 26.6531     | 26.6163     | 26.5391     | 26.5113     | 26.6979     |
| 24 | 30.5544     | 30.5547     | 30.5351     | 30.589      | 30.5853     | 30.5791     | 30.5392     | 30.5919     |
| 24 | 29.8613     | 29.8612     | 29.9749     | 29.9291     | 29.8768     | 30.061      | 29.8984     | 29.8969     |
| 24 | 30.4273     | 30.4275     | 30.366      | 30.4637     | 30.4095     | 30.405      | 30.3387     | 30.4        |
| 25 | 27.4771     | 27.4768     | 27.5119     | 27.5299     | 27.5482     | 27.5217     | 27.4889     | 27.5976     |
| 25 | 27.408      | 27.4079     | 27.4108     | 27.5258     | 27.3965     | 27.4652     | 27.3191     | 27.4204     |

**Table S12.** The calculated shielding tensors of each conformer (>2%) for isomer **4a**.

| no. C | calcd. shielded tensors of C for each conformer |             |             |             |             |             |             |
|-------|-------------------------------------------------|-------------|-------------|-------------|-------------|-------------|-------------|
|       | <b>4a-1</b>                                     | <b>4a-2</b> | <b>4a-3</b> | <b>4a-4</b> | <b>4a-5</b> | <b>4a-6</b> | <b>4a-7</b> |
| 2     | 51.2703                                         | 50.8165     | 52.1606     | 51.9316     | 51.9352     | 51.4138     | 51.4148     |
| 3     | 91.9025                                         | 92.398      | 93.0215     | 91.7782     | 91.7809     | 90.0542     | 90.0548     |
| 3a    | 70.923                                          | 71.5979     | 72.7644     | 71.3763     | 71.3754     | 69.8896     | 69.8966     |
| 4     | 80.0138                                         | 79.9306     | 79.6365     | 79.7872     | 79.7895     | 79.9744     | 79.975      |
| 5     | 77.2948                                         | 78.556      | 78.7201     | 78.378      | 78.3805     | 77.269      | 77.2727     |
| 6     | 74.4774                                         | 73.8789     | 73.3168     | 73.7611     | 73.7586     | 74.4069     | 74.4077     |
| 7     | 72.0295                                         | 74.3724     | 75.131      | 73.6484     | 73.6505     | 73.5241     | 73.5269     |
| 7a    | 65.1467                                         | 65.0085     | 64.3054     | 65.3255     | 65.3265     | 64.8335     | 64.8316     |
| 8     | 81.7592                                         | 86.2191     | 85.7293     | 84.1063     | 84.1057     | 81.5406     | 81.5421     |
| 9     | 74.659                                          | 74.3879     | 71.4259     | 76.7058     | 76.7007     | 75.6951     | 75.6923     |
| 10    | 38.2245                                         | 38.8782     | 39.2499     | 38.6049     | 38.6029     | 39.5156     | 39.5154     |
| 12    | 141.4701                                        | 141.2862    | 141.151     | 141.4593    | 141.4597    | 139.1952    | 139.1956    |
| 13    | 33.5184                                         | 33.3271     | 33.7692     | 33.5305     | 33.5282     | 33.5524     | 33.5512     |

|    |          |          |          |          |          |          |          |
|----|----------|----------|----------|----------|----------|----------|----------|
| 15 | 152.1553 | 152.1618 | 150.8621 | 152.3533 | 152.3511 | 152.1976 | 152.197  |
| 16 | 50.0037  | 51.9454  | 51.4973  | 49.7624  | 49.7603  | 49.4077  | 49.406   |
| 17 | 87.1401  | 82.9347  | 84.6438  | 87.7674  | 87.7693  | 86.8094  | 86.8101  |
| 18 | 172.1797 | 165.1248 | 168.1977 | 173.4001 | 173.3962 | 167.6177 | 167.6121 |
| 19 | 168.0748 | 173.0496 | 169.1796 | 168.4233 | 168.4238 | 171.5014 | 171.4961 |
| 20 | 176.8087 | 176.7483 | 176.4958 | 177.0697 | 177.0654 | 172.4273 | 172.4294 |
| 21 | 159.0376 | 157.4846 | 157.5809 | 158.9249 | 158.9244 | 158.7594 | 158.76   |
| 22 | 116.5986 | 118.3981 | 118.8588 | 118.3899 | 118.3932 | 117.3591 | 117.3625 |
| 23 | 98.1172  | 96.5094  | 96.3391  | 96.3841  | 96.3982  | 96.4739  | 96.4726  |
| 24 | 174.9433 | 174.6823 | 174.654  | 174.699  | 174.6976 | 174.6051 | 174.6025 |
| 25 | 125.3143 | 125.2069 | 125.1649 | 125.1044 | 125.1052 | 125.1137 | 125.1138 |

| no. H | calcd. shileding tensors of H for each conformer |         |         |         |         |         |         |
|-------|--------------------------------------------------|---------|---------|---------|---------|---------|---------|
|       | 4a-1                                             | 4a-2    | 4a-3    | 4a-4    | 4a-5    | 4a-6    | 4a-7    |
| 4     | 23.8274                                          | 23.8614 | 23.8401 | 23.8229 | 23.8231 | 23.9681 | 23.9683 |
| 5     | 24.1005                                          | 24.0474 | 24.0361 | 24.0492 | 24.0491 | 24.1272 | 24.1269 |
| 6     | 24.1036                                          | 24.2069 | 24.1918 | 24.1805 | 24.1806 | 24.2077 | 24.208  |
| 8     | 24.1202                                          | 23.9903 | 23.8318 | 24.1716 | 24.1718 | 24.2915 | 24.2916 |
| 12    | 26.9929                                          | 26.9784 | 27.0088 | 27.0442 | 27.0441 | 27.453  | 27.4521 |
| 16    | 24.9623                                          | 24.6932 | 24.846  | 24.9587 | 24.9585 | 24.8692 | 24.869  |
| 17    | 26.1459                                          | 25.6842 | 25.8218 | 26.1615 | 26.1615 | 26.1141 | 26.1142 |
| 17    | 25.9001                                          | 25.6564 | 25.6622 | 25.9914 | 25.9908 | 25.7958 | 25.7954 |
| 18    | 29.5973                                          | 30.0426 | 29.9026 | 29.5354 | 29.5361 | 29.8783 | 29.8786 |
| 18    | 29.9353                                          | 30.4683 | 30.0879 | 29.9759 | 29.9756 | 30.3778 | 30.3781 |
| 18    | 30.2224                                          | 29.6019 | 30.2845 | 30.2476 | 30.2477 | 29.5208 | 29.5213 |
| 19    | 29.5777                                          | 29.7139 | 29.5298 | 29.6544 | 29.6545 | 30.2018 | 30.2016 |
| 19    | 30.4083                                          | 30.141  | 30.296  | 30.3707 | 30.3707 | 29.9537 | 29.9535 |
| 19    | 29.9444                                          | 30.0703 | 29.8001 | 29.7464 | 29.7467 | 29.6004 | 29.6007 |
| 20    | 30.2875                                          | 30.2391 | 30.2542 | 30.2559 | 30.256  | 29.9987 | 29.9988 |
| 20    | 30.3581                                          | 30.3231 | 30.3386 | 30.3628 | 30.3627 | 30.0702 | 30.0704 |
| 20    | 29.687                                           | 29.631  | 29.6567 | 29.6383 | 29.6384 | 29.894  | 29.8935 |
| 21    | 28.3909                                          | 28.4342 | 28.4487 | 28.3246 | 28.3246 | 28.3177 | 28.3178 |
| 21    | 28.6356                                          | 27.7594 | 27.8215 | 27.6325 | 27.6324 | 27.7381 | 27.7379 |
| 22    | 26.9771                                          | 26.7756 | 26.8168 | 26.7146 | 26.7146 | 26.6864 | 26.6862 |
| 24    | 30.1778                                          | 30.8197 | 30.8082 | 30.7872 | 30.7871 | 30.7857 | 30.7855 |
| 24    | 30.1843                                          | 31.7632 | 31.7927 | 31.774  | 31.7737 | 31.5218 | 31.5211 |
| 24    | 29.2812                                          | 30.1847 | 30.1771 | 30.1226 | 30.1226 | 30.0775 | 30.0775 |
| 25    | 27.3196                                          | 27.4167 | 27.435  | 27.3704 | 27.37   | 27.4679 | 27.4682 |
| 25    | 27.5166                                          | 27.7501 | 27.7439 | 27.702  | 27.7022 | 27.7496 | 27.7494 |

**Table S13.** The calculated shielding tensors of each conformer (>2%) for isomer **4b**.

| no. C | calcd. shielding tensors of C for each conformer |             |             |             |
|-------|--------------------------------------------------|-------------|-------------|-------------|
|       | <b>4b-1</b>                                      | <b>4b-2</b> | <b>4b-3</b> | <b>4b-4</b> |
| 2     | 52.8025                                          | 51.9698     | 53.1163     | 51.7407     |
| 3     | 91.6041                                          | 95.6305     | 92.3622     | 93.2989     |
| 3a    | 72.9794                                          | 72.9764     | 70.2015     | 71.9843     |
| 4     | 79.9363                                          | 79.9179     | 79.5474     | 80.4804     |
| 5     | 77.5812                                          | 77.9763     | 79.8196     | 78.4494     |
| 6     | 74.8674                                          | 74.7205     | 74.1996     | 74.732      |
| 7     | 72.3156                                          | 72.6646     | 72.8394     | 72.6404     |
| 7a    | 64.8604                                          | 65.8523     | 65.0618     | 64.5892     |
| 8     | 84.1982                                          | 82.1555     | 86.6446     | 84.8388     |
| 9     | 72.7915                                          | 73.5648     | 71.704      | 72.1901     |
| 10    | 38.3647                                          | 39.0135     | 41.1852     | 39.3694     |
| 12    | 141.3428                                         | 141.3268    | 140.7096    | 141.1057    |
| 13    | 33.5273                                          | 33.4981     | 34.0532     | 33.6857     |
| 15    | 152.3048                                         | 151.5231    | 152.1541    | 151.2819    |
| 16    | 56.6438                                          | 52.8565     | 51.3338     | 51.3786     |
| 17    | 85.2159                                          | 83.2812     | 84.4813     | 85.4765     |
| 18    | 167.7026                                         | 165.3535    | 168.6415    | 168.9531    |
| 19    | 170.5608                                         | 172.7035    | 167.4264    | 169.0261    |
| 20    | 176.9672                                         | 176.5649    | 174.8145    | 176.4032    |
| 21    | 158.0343                                         | 157.7967    | 158.3218    | 157.6531    |
| 22    | 112.731                                          | 112.897     | 114.3469    | 112.9042    |
| 23    | 97.3081                                          | 97.1692     | 97.2062     | 97.1635     |
| 24    | 171.0026                                         | 170.9191    | 171.2892    | 170.856     |
| 25    | 129.6521                                         | 129.6189    | 129.7608    | 129.6758    |

| no. H | calcd. shielding tensors of H for each conformer |             |             |             |
|-------|--------------------------------------------------|-------------|-------------|-------------|
|       | <b>4b-1</b>                                      | <b>4b-2</b> | <b>4b-3</b> | <b>4b-4</b> |
| 4     | 23.7416                                          | 23.8381     | 24.0926     | 24.0025     |
| 5     | 24.1015                                          | 24.0546     | 24.0527     | 24.0725     |
| 6     | 24.1433                                          | 24.1454     | 24.1816     | 24.1448     |
| 8     | 23.9584                                          | 23.8765     | 23.8759     | 23.9602     |
| 12    | 27.0224                                          | 26.9633     | 27.2241     | 26.9911     |
| 16    | 25.1881                                          | 24.8856     | 24.9165     | 24.7654     |
| 17    | 26.0367                                          | 25.7396     | 25.7875     | 25.8646     |
| 17    | 26.0259                                          | 25.7918     | 25.6705     | 25.8076     |
| 18    | 30.1984                                          | 29.6789     | 30.4271     | 29.4399     |
| 18    | 30.1669                                          | 30.0715     | 30.0659     | 30.2934     |
| 18    | 29.7459                                          | 30.0587     | 29.9616     | 29.7825     |
| 19    | 29.5823                                          | 30.1553     | 29.7832     | 30.0146     |
| 19    | 30.2505                                          | 30.4828     | 30.3092     | 30.1083     |



|    |         |         |         |         |
|----|---------|---------|---------|---------|
| 19 | 29.9793 | 29.6472 | 29.4919 | 30.3021 |
| 20 | 30.2781 | 30.2477 | 30.1605 | 30.2487 |
| 20 | 30.3427 | 30.3256 | 30.1811 | 30.3467 |
| 20 | 29.6451 | 29.665  | 29.6976 | 29.6729 |
| 21 | 28.3965 | 28.4941 | 28.3279 | 28.476  |
| 21 | 28.5464 | 28.5756 | 28.5991 | 28.5583 |
| 22 | 27.2843 | 27.3356 | 27.4014 | 27.3056 |
| 24 | 29.189  | 29.1769 | 29.1941 | 29.199  |
| 24 | 30.0195 | 30.0133 | 30.0187 | 30.028  |
| 24 | 29.8518 | 29.8667 | 29.926  | 29.8647 |
| 25 | 27.6842 | 27.7272 | 27.6992 | 27.7318 |
| 25 | 27.1418 | 27.1727 | 27.1724 | 27.1887 |

**Table S14.** The calculated shielding tensors of each conformer (>2%) for isomer **4c**.

| no. C | calcd. shielding tensors of C for each conformer |             |             |             |             |             |
|-------|--------------------------------------------------|-------------|-------------|-------------|-------------|-------------|
|       | <b>4c-1</b>                                      | <b>4c-2</b> | <b>4c-3</b> | <b>4c-4</b> | <b>4c-5</b> | <b>4c-6</b> |
| 2     | 52.6929                                          | 52.0211     | 51.7131     | 51.5062     | 51.096      | 50.0336     |
| 3     | 88.816                                           | 93.4616     | 93.7717     | 90.6839     | 89.4069     | 91.9366     |
| 3a    | 71.9368                                          | 71.7367     | 72.1287     | 71.3256     | 68.9264     | 71.0102     |
| 4     | 80.0578                                          | 80.4881     | 80.0097     | 79.7015     | 80.0461     | 80.0032     |
| 5     | 77.4619                                          | 78.2657     | 77.6321     | 77.4414     | 79.1626     | 79.1489     |
| 6     | 74.8667                                          | 74.7278     | 74.8544     | 75.0107     | 74.7534     | 75.391      |
| 7     | 72.1887                                          | 72.8281     | 72.8474     | 72.6649     | 73.0343     | 74.382      |
| 7a    | 65.12                                            | 64.7372     | 65.8487     | 65.0253     | 66.0783     | 65.4396     |
| 8     | 84.9662                                          | 85.2891     | 83.9627     | 82.7369     | 84.2615     | 86.5474     |
| 9     | 72.9199                                          | 73.0862     | 74.5326     | 75.5703     | 75.7019     | 74.3293     |
| 10    | 40.0143                                          | 41.6649     | 40.7396     | 40.3549     | 38.4276     | 38.6592     |
| 12    | 139.0776                                         | 139.6695    | 139.2181    | 139.2048    | 141.4635    | 141.2189    |
| 13    | 32.9346                                          | 33.6836     | 33.2767     | 33.1985     | 33.4518     | 33.2831     |
| 15    | 152.1187                                         | 151.9244    | 151.6572    | 152.0007    | 152.8979    | 152.1141    |
| 16    | 56.4524                                          | 51.31       | 52.4217     | 50.0258     | 50.0984     | 51.6318     |
| 17    | 85.5987                                          | 85.2456     | 83.4612     | 86.944      | 87.7562     | 83.4281     |
| 18    | 170.4937                                         | 169.0485    | 172.4292    | 167.6942    | 173.1443    | 164.0091    |
| 19    | 168.2136                                         | 168.7829    | 165.6039    | 172.2783    | 168.0669    | 172.5519    |
| 20    | 172.6949                                         | 172.4955    | 172.8184    | 172.7985    | 176.7451    | 176.7078    |
| 21    | 158.1045                                         | 157.7276    | 158.0167    | 157.8679    | 157.8957    | 153.0169    |
| 22    | 112.6309                                         | 112.8359    | 112.8119    | 113.0443    | 113.6127    | 116.2569    |
| 23    | 97.2619                                          | 97.1523     | 97.1373     | 97.3924     | 96.9571     | 100.2926    |
| 24    | 170.9992                                         | 170.7703    | 170.8568    | 170.8052    | 171.5057    | 171.6712    |
| 25    | 129.6143                                         | 129.6297    | 129.5763    | 129.6672    | 129.6368    | 126.1513    |

| no. H | calcd. shielding tensors of H for each conformer |         |         |         |         |         |
|-------|--------------------------------------------------|---------|---------|---------|---------|---------|
|       | 4c-1                                             | 4c-2    | 4c-3    | 4c-4    | 4c-5    | 4c-6    |
| 4     | 23.8698                                          | 23.9974 | 23.8791 | 23.8922 | 24.0656 | 23.9905 |
| 5     | 24.0527                                          | 24.0642 | 24.08   | 24.0736 | 24.0967 | 24.0589 |
| 6     | 23.9828                                          | 23.9601 | 23.8645 | 24.1211 | 24.1404 | 23.8583 |
| 8     | 24.1035                                          | 24.1477 | 24.1631 | 24.1397 | 24.1413 | 24.2658 |
| 12    | 27.4062                                          | 27.3017 | 27.4085 | 27.4373 | 27.0174 | 26.9792 |
| 16    | 25.2411                                          | 24.7917 | 24.8897 | 24.9549 | 24.9102 | 24.7566 |
| 17    | 26.0529                                          | 25.8445 | 25.7152 | 26.1884 | 26.0943 | 25.714  |
| 17    | 25.9858                                          | 25.7963 | 25.7652 | 25.8937 | 25.9077 | 25.6729 |
| 18    | 29.9412                                          | 30.3364 | 29.5729 | 30.1975 | 29.6273 | 29.7729 |
| 18    | 30.2177                                          | 30.1307 | 30.4713 | 29.897  | 30.3947 | 30.1071 |
| 18    | 29.5589                                          | 30.0423 | 30.1098 | 29.6922 | 29.6754 | 30.0409 |
| 19    | 29.7991                                          | 29.8138 | 30.0234 | 30.0551 | 29.4835 | 30.0195 |
| 19    | 30.1679                                          | 30.3262 | 30.0518 | 30.4153 | 29.9387 | 30.4277 |
| 19    | 30.2567                                          | 29.4541 | 29.7231 | 29.6453 | 30.1881 | 29.4876 |
| 20    | 29.976                                           | 30.028  | 29.9645 | 29.9794 | 30.3022 | 30.2672 |
| 20    | 29.9716                                          | 30.0217 | 29.9817 | 30.0037 | 30.4053 | 30.3669 |
| 20    | 29.8339                                          | 29.8097 | 29.8506 | 29.8744 | 29.712  | 29.6777 |
| 21    | 28.5029                                          | 28.5568 | 28.5612 | 28.5669 | 28.4943 | 28.5062 |
| 21    | 28.3977                                          | 28.49   | 28.4959 | 28.3921 | 28.3371 | 28.4898 |
| 22    | 27.2731                                          | 27.3239 | 27.3444 | 27.3292 | 27.2558 | 27.8242 |
| 24    | 29.1771                                          | 29.2001 | 29.1751 | 29.2341 | 29.133  | 29.351  |
| 24    | 29.8426                                          | 29.8672 | 29.8664 | 29.8818 | 29.856  | 30.4908 |
| 24    | 29.9927                                          | 30.023  | 30.0023 | 30.0249 | 29.9367 | 29.4821 |
| 25    | 27.1302                                          | 27.194  | 27.1628 | 27.1491 | 27.1445 | 27.2821 |
| 25    | 27.6916                                          | 27.7453 | 27.7377 | 27.6979 | 27.6674 | 27.9861 |

**Table S15.** The calculated shielding tensors of each conformer (>2%) for isomer **4d**.

| no. C | calcd. shielding tensors of C for each conformer |          |          |          |          |          |
|-------|--------------------------------------------------|----------|----------|----------|----------|----------|
|       | 4d-1                                             | 4d-2     | 4d-3     | 4d-4     | 4d-5     | 4d-6     |
| 2     | 49.989                                           | 51.7346  | 51.0222  | 53.7453  | 52.2117  | 52.3079  |
| 3     | 91.7609                                          | 90.9467  | 90.276   | 92.5511  | 92.3163  | 92.8558  |
| 3a    | 71.2261                                          | 74.0272  | 69.6386  | 73.3501  | 72.4839  | 72.8384  |
| 4     | 79.3942                                          | 79.3327  | 79.9083  | 80.105   | 79.5181  | 79.5621  |
| 5     | 78.8127                                          | 78.3787  | 78.8158  | 77.2869  | 77.8846  | 78.8837  |
| 6     | 74.523                                           | 74.3515  | 74.3774  | 74.4778  | 74.5662  | 73.502   |
| 7     | 73.1877                                          | 75.2802  | 73.1132  | 74.2248  | 74.807   | 75.4872  |
| 7a    | 64.7807                                          | 64.029   | 66.1144  | 64.5836  | 64.9482  | 64.4707  |
| 8     | 86.2407                                          | 84.5921  | 85.0732  | 84.0913  | 82.4059  | 85.7941  |
| 9     | 74.8154                                          | 71.7718  | 76.1726  | 73.415   | 73.0773  | 71.2322  |
| 10    | 38.4944                                          | 38.8693  | 38.4619  | 38.782   | 38.7073  | 40.8675  |
| 12    | 141.3123                                         | 141.2049 | 141.4139 | 141.3375 | 141.1696 | 139.5232 |

|    |          |          |          |          |          |          |
|----|----------|----------|----------|----------|----------|----------|
| 13 | 33.2322  | 33.7957  | 33.466   | 33.7614  | 33.8498  | 33.4445  |
| 15 | 152.1567 | 150.1914 | 153.0903 | 152.3972 | 151.6205 | 151.1992 |
| 16 | 51.7567  | 51.6212  | 50.1684  | 58.1569  | 53.6778  | 51.4754  |
| 17 | 83.4631  | 85.7002  | 87.7077  | 84.2973  | 82.6168  | 84.6799  |
| 18 | 172.8832 | 170.0261 | 168.0912 | 169.66   | 172.429  | 168.0879 |
| 19 | 164.0097 | 169.2142 | 173.0195 | 167.7814 | 164.1066 | 169.3494 |
| 20 | 176.7967 | 176.4598 | 176.9011 | 176.8806 | 176.6581 | 172.6002 |
| 21 | 157.5277 | 157.7436 | 158.6279 | 159.2302 | 158.3057 | 157.2062 |
| 22 | 118.1636 | 117.5382 | 117.4929 | 117.8898 | 118.1463 | 118.6716 |
| 23 | 98.1329  | 96.4722  | 98.1965  | 96.5152  | 96.3008  | 96.4649  |
| 24 | 175.47   | 174.7376 | 175.4211 | 174.7073 | 174.7222 | 174.6641 |
| 25 | 125.3508 | 125.1375 | 125.2197 | 125.057  | 125.0718 | 125.1566 |

| no. H | calcd. shileding tensors of H for each conformer |         |         |         |         |         |
|-------|--------------------------------------------------|---------|---------|---------|---------|---------|
|       | 4d-1                                             | 4d-2    | 4d-3    | 4d-4    | 4d-5    | 4d-6    |
| 4     | 23.9073                                          | 23.8604 | 24.0299 | 23.7676 | 23.8572 | 23.8446 |
| 5     | 24.007                                           | 24.1076 | 24.077  | 24.0497 | 24.0673 | 24.0448 |
| 6     | 24.1552                                          | 24.2364 | 24.0972 | 24.191  | 24.2185 | 24.1762 |
| 8     | 23.8316                                          | 24.0524 | 24.0954 | 23.999  | 23.9937 | 23.799  |
| 12    | 26.9618                                          | 26.9706 | 27.0364 | 27.0255 | 26.9792 | 27.3275 |
| 16    | 24.6592                                          | 24.6553 | 24.8949 | 25.0484 | 24.676  | 24.8367 |
| 17    | 25.7375                                          | 25.7664 | 25.9497 | 26.1106 | 25.76   | 25.6714 |
| 17    | 25.7401                                          | 25.7854 | 26.0782 | 26.0544 | 25.7017 | 25.8146 |
| 18    | 29.6042                                          | 29.4043 | 29.6351 | 30.23   | 29.6482 | 30.2837 |
| 18    | 30.1129                                          | 30.2232 | 30.3847 | 30.1345 | 30.1545 | 30.0917 |
| 18    | 30.1565                                          | 29.8558 | 29.6664 | 29.7951 | 30.069  | 29.9241 |
| 19    | 30.4398                                          | 29.9572 | 29.9343 | 30.2027 | 30.4374 | 30.2827 |
| 19    | 29.4932                                          | 30.373  | 30.191  | 29.8613 | 29.5058 | 29.5233 |
| 19    | 30.0786                                          | 30.0455 | 29.4785 | 29.5143 | 30.11   | 29.8059 |
| 20    | 29.6546                                          | 29.7011 | 29.6936 | 29.6673 | 29.6697 | 29.837  |
| 20    | 30.3512                                          | 30.3461 | 30.4073 | 30.3657 | 30.344  | 29.9755 |
| 20    | 30.2502                                          | 30.2717 | 30.2975 | 30.2943 | 30.2727 | 30.02   |
| 21    | 28.4595                                          | 28.4357 | 28.4214 | 28.3792 | 28.4278 | 28.4476 |
| 21    | 28.6745                                          | 27.9161 | 28.6283 | 27.7716 | 27.873  | 27.8031 |
| 22    | 27.0837                                          | 26.8099 | 27.022  | 26.7547 | 26.7994 | 26.8141 |
| 24    | 30.2588                                          | 30.7264 | 30.2213 | 30.7136 | 30.708  | 30.7865 |
| 24    | 29.376                                           | 30.0514 | 29.2685 | 30.0457 | 30.0459 | 30.1461 |
| 24    | 30.2501                                          | 31.4021 | 30.1941 | 31.3772 | 31.3974 | 31.7193 |
| 25    | 27.552                                           | 27.6968 | 27.6224 | 27.6874 | 27.6708 | 27.7314 |
| 25    | 27.3608                                          | 27.4637 | 27.4455 | 27.4651 | 27.4408 | 27.4221 |

**Table S16.** The Cartesian coordinates of the lowest energy conformers (Conf. 1-8) for isomer 2a.

| conf. 2a-1 | X axis(Å) | Y axis(Å) | Z axis(Å) | conf. 2a-1 | X axis(Å) | Y axis(Å) | Z axis(Å) |
|------------|-----------|-----------|-----------|------------|-----------|-----------|-----------|
| C          | -0.172706 | -2.791617 | -1.786573 | C          | -0.172255 | -2.72506  | -2.073875 |
| C          | 1.224944  | -2.621709 | -1.694125 | C          | 1.223092  | -2.606481 | -1.897462 |
| C          | 1.795302  | -1.416886 | -1.276979 | C          | 1.806416  | -1.445824 | -1.386216 |
| C          | 0.894301  | -0.389725 | -0.940288 | C          | 0.922081  | -0.405944 | -1.039956 |
| C          | -0.515822 | -0.541231 | -0.995654 | C          | -0.484494 | -0.50603  | -1.189927 |
| C          | -1.047045 | -1.764988 | -1.449921 | C          | -1.030122 | -1.685669 | -1.73381  |
| N          | 1.145319  | 0.912109  | -0.552611 | N          | 1.187932  | 0.861864  | -0.564323 |
| C          | -0.035813 | 1.598514  | -0.359045 | C          | 0.01457   | 1.579445  | -0.408877 |
| C          | -1.100011 | 0.730423  | -0.611036 | C          | -1.055158 | 0.76267   | -0.774057 |
| C          | -2.520834 | 1.060548  | -0.563359 | C          | -2.485919 | 1.077342  | -0.779659 |
| C          | -3.515265 | 0.320929  | -0.021132 | C          | -3.466724 | 0.330618  | -0.224861 |
| C          | -4.9203   | 0.822564  | -0.089969 | C          | -4.890228 | 0.75616   | -0.378253 |
| N          | -5.863135 | 0.027274  | 0.499193  | N          | -5.814892 | -0.034534 | 0.246242  |
| C          | -5.700617 | -1.335543 | 1.002048  | C          | -5.579934 | -1.086044 | 1.234277  |
| C          | -4.236536 | -1.696927 | 1.240007  | C          | -4.129067 | -1.568467 | 1.241348  |
| N          | -3.294836 | -0.873939 | 0.689367  | N          | -3.225112 | -0.837659 | 0.522773  |
| C          | -0.007108 | 3.079034  | 0.023905  | C          | 0.119896  | 2.995039  | 0.155689  |
| C          | 1.386472  | 3.438882  | 0.524861  | C          | 1.139905  | 3.754392  | -0.689832 |
| C          | 2.26542   | 4.272276  | -0.038959 | C          | 2.301608  | 4.277713  | -0.288284 |
| C          | -0.986834 | 3.362276  | 1.193983  | C          | 0.530334  | 2.910809  | 1.645514  |
| C          | -0.416049 | 3.922073  | -1.206707 | C          | -1.213294 | 3.770283  | 0.059928  |
| C          | -6.360305 | -2.378507 | 0.079971  | C          | -6.544622 | -2.258593 | 1.019774  |
| C          | 3.291042  | -1.226615 | -1.161238 | C          | 3.297095  | -1.299864 | -1.184346 |
| C          | 3.765276  | -1.335038 | 0.301667  | C          | 3.681501  | -1.425614 | 0.302995  |
| C          | 5.239524  | -0.951686 | 0.565259  | C          | 5.089955  | -0.919503 | 0.68362   |
| C          | 6.23654   | -1.7873   | -0.245588 | C          | 6.218494  | -1.656008 | -0.046378 |
| C          | 5.486173  | 0.547378  | 0.336527  | C          | 5.216882  | 0.596609  | 0.472043  |
| O          | 4.583455  | 1.370936  | 1.070206  | O          | 4.14242   | 1.329469  | 1.063562  |
| O          | 3.624989  | -2.679797 | 0.789279  | O          | 3.626067  | -2.794402 | 0.739164  |
| O          | 5.477998  | -1.13012  | 1.975765  | O          | 5.228723  | -1.085985 | 2.108759  |
| O          | -3.935269 | -2.700742 | 1.876641  | O          | -3.795687 | -2.549108 | 1.897714  |
| O          | -5.215469 | 1.897239  | -0.61322  | O          | -5.221717 | 1.73536   | -1.045692 |
| H          | -0.568448 | -3.741218 | -2.136644 | H          | -0.577362 | -3.642119 | -2.493076 |
| H          | 1.880666  | -3.441631 | -1.979052 | H          | 1.868119  | -3.432356 | -2.190123 |
| H          | -2.11927  | -1.90282  | -1.55017  | H          | -2.099873 | -1.777775 | -1.898609 |
| H          | 2.056111  | 1.316773  | -0.372242 | H          | 2.098999  | 1.216146  | -0.291156 |
| H          | -2.857772 | 2.00158   | -0.988214 | H          | -2.839115 | 1.970407  | -1.283867 |
| H          | -6.808673 | 0.386321  | 0.418803  | H          | -6.768982 | 0.294134  | 0.139358  |
| H          | -6.17575  | -1.395057 | 1.988888  | H          | -5.74871  | -0.681234 | 2.245727  |
| H          | -2.332709 | -1.156894 | 0.854008  | H          | -2.264865 | -1.162658 | 0.594995  |

|                                    |           |           |           |                                   |           |           |           |
|------------------------------------|-----------|-----------|-----------|-----------------------------------|-----------|-----------|-----------|
| H                                  | 1.668109  | 2.951242  | 1.460273  | H                                 | 0.845079  | 3.870303  | -1.734413 |
| H                                  | 3.231833  | 4.452262  | 0.424095  | H                                 | 2.939167  | 4.814848  | -0.986218 |
| H                                  | 2.064736  | 4.80021   | -0.967444 | H                                 | 2.668799  | 4.190624  | 0.730133  |
| H                                  | -2.020334 | 3.133621  | 0.922035  | H                                 | -0.226666 | 2.355029  | 2.20911   |
| H                                  | -0.930371 | 4.42121   | 1.47036   | H                                 | 0.608662  | 3.915322  | 2.07696   |
| H                                  | -0.728841 | 2.764124  | 2.075362  | H                                 | 1.492223  | 2.406215  | 1.781526  |
| H                                  | 0.251127  | 3.742977  | -2.056741 | H                                 | -1.550824 | 3.875196  | -0.976476 |
| H                                  | -0.391124 | 4.990525  | -0.963449 | H                                 | -1.067818 | 4.777269  | 0.465802  |
| H                                  | -1.432957 | 3.674836  | -1.524652 | H                                 | -2.00736  | 3.282798  | 0.633405  |
| H                                  | -7.429757 | -2.163475 | -0.026868 | H                                 | -7.582405 | -1.915166 | 1.10425   |
| H                                  | -5.905545 | -2.361154 | -0.916679 | H                                 | -6.403556 | -2.698229 | 0.026695  |
| H                                  | -6.245855 | -3.37868  | 0.508087  | H                                 | -6.367061 | -3.026715 | 1.776194  |
| H                                  | 3.807957  | -1.982078 | -1.762464 | H                                 | 3.833166  | -2.064934 | -1.756164 |
| H                                  | 3.574634  | -0.244497 | -1.56295  | H                                 | 3.62274   | -0.323854 | -1.567856 |
| H                                  | 3.152239  | -0.671474 | 0.92373   | H                                 | 2.972232  | -0.84317  | 0.901999  |
| H                                  | 7.256902  | -1.548997 | 0.072049  | H                                 | 7.18732   | -1.306578 | 0.325882  |
| H                                  | 6.153861  | -1.587677 | -1.320838 | H                                 | 6.180367  | -1.484126 | -1.128843 |
| H                                  | 6.064043  | -2.855357 | -0.081757 | H                                 | 6.148774  | -2.733495 | 0.130537  |
| H                                  | 5.361349  | 0.814135  | -0.71634  | H                                 | 5.211646  | 0.852488  | -0.590322 |
| H                                  | 6.525151  | 0.766055  | 0.621296  | H                                 | 6.178038  | 0.918693  | 0.895423  |
| H                                  | 4.65664   | 1.092134  | 1.999794  | H                                 | 4.126959  | 1.081846  | 2.004505  |
| H                                  | 2.685927  | -2.925469 | 0.751692  | H                                 | 2.707223  | -3.101694 | 0.672474  |
| H                                  | 5.060565  | -1.972529 | 2.229078  | H                                 | 4.881056  | -1.969442 | 2.324873  |
| Free Energy = -1473.195673 Hartree |           |           |           | Free Energy = -1473.19564 Hartree |           |           |           |

| conf. 2a-3 | X axis(Å) | Y axis(Å) | Z axis(Å) | conf. 2a-4 | X axis(Å) | Y axis(Å) | Z axis(Å) |
|------------|-----------|-----------|-----------|------------|-----------|-----------|-----------|
| C          | 0.036542  | -2.88822  | -1.684376 | C          | -0.089921 | -3.199038 | -0.735288 |
| C          | 1.429196  | -2.683631 | -1.595836 | C          | -1.412665 | -3.06301  | -0.264795 |
| C          | 1.970301  | -1.465276 | -1.181198 | C          | -1.920942 | -1.834071 | 0.160387  |
| C          | 1.04832   | -0.459409 | -0.831981 | C          | -1.035934 | -0.740252 | 0.10466   |
| C          | -0.357305 | -0.64562  | -0.892657 | C          | 0.313465  | -0.859092 | -0.31819  |
| C          | -0.859715 | -1.880458 | -1.350233 | C          | 0.775083  | -2.112155 | -0.769347 |
| N          | 1.272779  | 0.852183  | -0.445868 | N          | -1.253033 | 0.592187  | 0.414767  |
| C          | 0.070031  | 1.507443  | -0.26192  | C          | -0.102142 | 1.325841  | 0.201337  |
| C          | -0.971701 | 0.612638  | -0.517353 | C          | 0.904807  | 0.461988  | -0.236843 |
| C          | -2.393557 | 0.928046  | -0.464547 | C          | 2.264542  | 0.854316  | -0.582498 |
| C          | -3.388825 | 0.165922  | 0.045877  | C          | 3.41473   | 0.196825  | -0.303493 |
| C          | -4.795264 | 0.664411  | -0.008337 | C          | 4.714822  | 0.767114  | -0.76606  |
| N          | -5.738184 | -0.169179 | 0.530103  | N          | 5.822168  | 0.021328  | -0.459045 |
| C          | -5.570933 | -1.575305 | 0.892189  | C          | 5.837486  | -1.385876 | -0.059618 |
| C          | -4.113737 | -1.919356 | 1.19017   | C          | 4.569509  | -1.758004 | 0.713234  |
| N          | -3.168827 | -1.051711 | 0.720721  | N          | 3.479337  | -0.96215  | 0.495651  |

|   |           |           |           |   |           |           |           |
|---|-----------|-----------|-----------|---|-----------|-----------|-----------|
| C | 0.004365  | 2.979969  | 0.143288  | C | -0.041284 | 2.829844  | 0.468602  |
| C | -0.639408 | 3.745817  | -1.010276 | C | 0.229099  | 3.530977  | -0.860396 |
| C | -1.73723  | 4.50558   | -0.969472 | C | 1.243733  | 4.347432  | -1.157458 |
| C | 1.418506  | 3.575706  | 0.346264  | C | 1.038404  | 3.124627  | 1.534123  |
| C | -0.773616 | 3.126484  | 1.469989  | C | -1.393456 | 3.365166  | 0.999399  |
| C | -6.132536 | -2.530373 | -0.17914  | C | 7.095358  | -1.699104 | 0.752522  |
| C | 3.459994  | -1.22037  | -1.119206 | C | -3.348336 | -1.667757 | 0.627477  |
| C | 3.984717  | -1.193972 | 0.329552  | C | -4.23026  | -1.005267 | -0.448869 |
| C | 5.377966  | -0.558974 | 0.527133  | C | -5.580619 | -0.44076  | 0.042976  |
| C | 6.494819  | -1.305743 | -0.210806 | C | -6.512885 | -1.512054 | 0.619435  |
| C | 5.37689   | 0.923246  | 0.127689  | C | -5.373729 | 0.688639  | 1.06213   |
| O | 4.269916  | 1.646564  | 0.673425  | O | -4.403793 | 1.650377  | 0.638392  |
| O | 4.075942  | -2.518996 | 0.878651  | O | -4.550042 | -1.927612 | -1.503528 |
| O | 5.640987  | -0.543562 | 1.943991  | O | -6.205006 | 0.208816  | -1.082017 |
| O | -3.819719 | -2.94607  | 1.793693  | O | 4.523407  | -2.741358 | 1.443913  |
| O | -5.094491 | 1.766193  | -0.468609 | O | 4.803167  | 1.851298  | -1.341736 |
| H | -0.337655 | -3.846575 | -2.034283 | H | 0.257328  | -4.173354 | -1.068472 |
| H | 2.104722  | -3.48485  | -1.887959 | H | -2.055645 | -3.939629 | -0.221554 |
| H | -1.928084 | -2.040826 | -1.455541 | H | 1.786932  | -2.229039 | -1.144294 |
| H | 2.180392  | 1.243997  | -0.212157 | H | -2.149384 | 0.993283  | 0.671815  |
| H | -2.717924 | 1.891915  | -0.845958 | H | 2.404834  | 1.797713  | -1.102147 |
| H | -6.686215 | 0.183602  | 0.451316  | H | 6.687483  | 0.409163  | -0.82024  |
| H | -6.107796 | -1.75051  | 1.831579  | H | 5.833228  | -2.028926 | -0.957402 |
| H | -2.208074 | -1.322465 | 0.910718  | H | 2.634701  | -1.254411 | 0.978847  |
| H | -0.10401  | 3.647272  | -1.956327 | H | -0.522374 | 3.328894  | -1.62611  |
| H | -2.092661 | 5.017637  | -1.859877 | H | 1.32195   | 4.802473  | -2.141422 |
| H | -2.3309   | 4.637917  | -0.069276 | H | 2.037239  | 4.583583  | -0.45397  |
| H | 1.963001  | 3.06696   | 1.149517  | H | 0.794566  | 2.602422  | 2.465971  |
| H | 1.32504   | 4.631022  | 0.621354  | H | 1.078396  | 4.1989    | 1.747997  |
| H | 2.026491  | 3.525955  | -0.563863 | H | 2.032335  | 2.798996  | 1.216625  |
| H | -1.797355 | 2.751143  | 1.392005  | H | -2.210057 | 3.224582  | 0.283531  |
| H | -0.813524 | 4.178869  | 1.773999  | H | -1.30332  | 4.439831  | 1.18638   |
| H | -0.268848 | 2.564045  | 2.263446  | H | -1.677732 | 2.88292   | 1.942123  |
| H | -7.198496 | -2.331369 | -0.338839 | H | 7.992292  | -1.503122 | 0.153031  |
| H | -5.612209 | -2.395405 | -1.133941 | H | 7.135136  | -1.081904 | 1.656086  |
| H | -6.016022 | -3.568136 | 0.147755  | H | 7.093945  | -2.750717 | 1.047553  |
| H | 3.992246  | -2.000027 | -1.674819 | H | -3.775771 | -2.643071 | 0.884385  |
| H | 3.686857  | -0.265003 | -1.610265 | H | -3.363559 | -1.05953  | 1.541095  |
| H | 3.290372  | -0.613137 | 0.947226  | H | -3.683283 | -0.16147  | -0.884551 |
| H | 7.461245  | -0.84236  | 0.014514  | H | -7.472047 | -1.059286 | 0.892446  |
| H | 6.344375  | -1.285673 | -1.296821 | H | -6.084108 | -1.982929 | 1.512136  |
| H | 6.529425  | -2.351424 | 0.108562  | H | -6.698537 | -2.294664 | -0.122093 |
| H | 5.310295  | 1.041486  | -0.956094 | H | -5.016387 | 0.299616  | 2.018241  |

|                                    |          |           |          |                                    |           |           |           |
|------------------------------------|----------|-----------|----------|------------------------------------|-----------|-----------|-----------|
| H                                  | 6.323764 | 1.367316  | 0.462163 | H                                  | -6.343351 | 1.174917  | 1.233026  |
| H                                  | 4.332691 | 1.564328  | 1.640611 | H                                  | -4.725013 | 2.01723   | -0.203292 |
| H                                  | 3.182651 | -2.897418 | 0.921793 | H                                  | -3.724914 | -2.18794  | -1.944737 |
| H                                  | 5.397816 | -1.421696 | 2.286691 | H                                  | -6.119246 | -0.394234 | -1.841374 |
| Free Energy = -1473.195357 Hartree |          |           |          | Free Energy = -1473.195266 Hartree |           |           |           |

| conf. 2a-5 | X axis(Å) | Y axis(Å) | Z axis(Å) | conf. 2a-6 | X axis(Å) | Y axis(Å) | Z axis(Å) |
|------------|-----------|-----------|-----------|------------|-----------|-----------|-----------|
| C          | 0.037426  | -2.993093 | -1.557442 | C          | 0.152832  | -3.261188 | -0.559316 |
| C          | 1.430719  | -2.796553 | -1.459677 | C          | -1.1666   | -3.126557 | -0.076943 |
| C          | 1.978486  | -1.560123 | -1.113248 | C          | -1.724977 | -1.879123 | 0.206639  |
| C          | 1.061785  | -0.525036 | -0.843292 | C          | -0.892903 | -0.762494 | -0.005549 |
| C          | -0.34428  | -0.702499 | -0.911806 | C          | 0.449316  | -0.873047 | -0.447825 |
| C          | -0.853185 | -1.958263 | -1.299099 | C          | 0.964103  | -2.148897 | -0.749918 |
| N          | 1.293119  | 0.80352   | -0.527191 | N          | -1.15817  | 0.583004  | 0.149995  |
| C          | 0.09299   | 1.476825  | -0.39098  | C          | -0.044739 | 1.339513  | -0.171875 |
| C          | -0.951778 | 0.580249  | -0.614774 | C          | 0.987271  | 0.473188  | -0.536569 |
| C          | -2.375634 | 0.901978  | -0.625604 | C          | 2.345227  | 0.805102  | -0.97019  |
| C          | -3.380938 | 0.179446  | -0.08086  | C          | 3.491197  | 0.244013  | -0.522422 |
| C          | -4.788241 | 0.655955  | -0.225465 | C          | 4.796766  | 0.681343  | -1.102898 |
| N          | -5.740175 | -0.117767 | 0.381988  | N          | 5.904439  | 0.066751  | -0.585896 |
| C          | -5.578138 | -1.466505 | 0.921439  | C          | 5.941306  | -1.150843 | 0.223773  |
| C          | -4.122463 | -1.78314  | 1.2547    | C          | 4.636464  | -1.359946 | 0.995817  |
| N          | -3.171788 | -0.971582 | 0.704506  | N          | 3.542123  | -0.679812 | 0.538186  |
| C          | 0.04843   | 2.974969  | -0.100227 | C          | -0.146562 | 2.855756  | -0.005834 |
| C          | -1.06879  | 3.267986  | 0.894465  | C          | -0.417902 | 3.126849  | 1.472994  |
| C          | -2.019403 | 4.199795  | 0.7927    | C          | -1.492847 | 3.711364  | 2.009625  |
| C          | -0.126865 | 3.733752  | -1.437594 | C          | -1.26805  | 3.40035   | -0.921871 |
| C          | 1.363957  | 3.455155  | 0.56828   | C          | 1.165512  | 3.585066  | -0.37215  |
| C          | -6.152495 | -2.545448 | -0.016988 | C          | 7.145139  | -1.13129  | 1.169442  |
| C          | 3.469555  | -1.324134 | -1.045063 | C          | -3.144822 | -1.711592 | 0.69634   |
| C          | 3.967162  | -1.156947 | 0.403605  | C          | -4.073739 | -1.171882 | -0.408891 |
| C          | 5.363274  | -0.518281 | 0.563694  | C          | -5.417227 | -0.580006 | 0.070076  |
| C          | 6.489487  | -1.356719 | -0.051576 | C          | -6.296331 | -1.593161 | 0.811355  |
| C          | 5.39238   | 0.90654   | -0.00724  | C          | -5.202013 | 0.67266   | 0.932225  |
| O          | 4.275033  | 1.698856  | 0.407192  | O          | -4.314052 | 1.61464   | 0.325015  |
| O          | 4.030832  | -2.41929  | 1.086954  | O          | -4.41308  | -2.202014 | -1.353017 |
| O          | 5.590839  | -0.340415 | 1.975801  | O          | -6.103236 | -0.086124 | -1.097708 |
| O          | -3.834784 | -2.744683 | 1.96022   | O          | 4.571576  | -2.134044 | 1.943853  |
| O          | -5.082344 | 1.692267  | -0.820779 | O          | 4.883313  | 1.563769  | -1.956083 |
| H          | -0.341347 | -3.968012 | -1.852335 | H          | 0.539633  | -4.253359 | -0.775686 |
| H          | 2.102167  | -3.621507 | -1.688228 | H          | -1.765843 | -4.019309 | 0.089852  |
| H          | -1.921893 | -2.114826 | -1.407646 | H          | 1.975464  | -2.263221 | -1.12826  |

|                                    |           |           |           |                                    |           |           |           |
|------------------------------------|-----------|-----------|-----------|------------------------------------|-----------|-----------|-----------|
| H                                  | 2.204542  | 1.201642  | -0.318844 | H                                  | -2.046413 | 0.982236  | 0.437909  |
| H                                  | -2.70033  | 1.823784  | -1.096402 | H                                  | 2.494831  | 1.567375  | -1.726652 |
| H                                  | -6.687451 | 0.216707  | 0.239736  | H                                  | 6.773725  | 0.36111   | -1.01879  |
| H                                  | -6.111376 | -1.517881 | 1.878086  | H                                  | 6.032597  | -2.031284 | -0.435533 |
| H                                  | -2.21344  | -1.223951 | 0.929196  | H                                  | 2.677224  | -0.880828 | 1.032718  |
| H                                  | -1.02713  | 2.659586  | 1.799316  | H                                  | 0.385606  | 2.796712  | 2.133897  |
| H                                  | -2.744136 | 4.343059  | 1.589593  | H                                  | -1.56405  | 3.862726  | 3.083942  |
| H                                  | -2.13643  | 4.833845  | -0.081935 | H                                  | -2.336632 | 4.05422   | 1.417343  |
| H                                  | 0.690356  | 3.482034  | -2.122151 | H                                  | -1.045178 | 3.161134  | -1.967334 |
| H                                  | -0.107461 | 4.817344  | -1.273599 | H                                  | -1.335397 | 4.490151  | -0.828801 |
| H                                  | -1.070598 | 3.477064  | -1.92882  | H                                  | -2.248917 | 2.981801  | -0.677981 |
| H                                  | 1.549732  | 2.928951  | 1.512326  | H                                  | 2.016755  | 3.22649   | 0.214135  |
| H                                  | 1.280325  | 4.522889  | 0.793824  | H                                  | 1.042429  | 4.6546    | -0.170359 |
| H                                  | 2.236546  | 3.320567  | -0.080029 | H                                  | 1.406285  | 3.47026   | -1.433683 |
| H                                  | -7.218385 | -2.361236 | -0.194321 | H                                  | 8.076637  | -1.060949 | 0.59534   |
| H                                  | -5.637468 | -2.535532 | -0.984073 | H                                  | 7.087928  | -0.275467 | 1.850195  |
| H                                  | -6.039696 | -3.534022 | 0.43815   | H                                  | 7.166266  | -2.049318 | 1.76088   |
| H                                  | 4.004222  | -2.15946  | -1.510089 | H                                  | -3.536815 | -2.670519 | 1.052407  |
| H                                  | 3.714723  | -0.42358  | -1.623095 | H                                  | -3.152769 | -1.024422 | 1.552683  |
| H                                  | 3.269794  | -0.508622 | 0.946224  | H                                  | -3.556955 | -0.369476 | -0.947278 |
| H                                  | 7.455273  | -0.878613 | 0.144001  | H                                  | -7.25811  | -1.133768 | 1.062777  |
| H                                  | 6.367655  | -1.463687 | -1.136062 | H                                  | -5.822336 | -1.93673  | 1.738571  |
| H                                  | 6.503564  | -2.357866 | 0.389026  | H                                  | -6.484683 | -2.467372 | 0.181105  |
| H                                  | 5.364543  | 0.895278  | -1.099099 | H                                  | -4.763502 | 0.420701  | 1.900392  |
| H                                  | 6.331558  | 1.380989  | 0.305904  | H                                  | -6.182277 | 1.134552  | 1.111348  |
| H                                  | 4.310868  | 1.752608  | 1.377534  | H                                  | -4.689807 | 1.820855  | -0.548738 |
| H                                  | 3.132774  | -2.784355 | 1.144137  | H                                  | -3.600111 | -2.488868 | -1.800028 |
| H                                  | 5.333154  | -1.171714 | 2.411764  | H                                  | -6.01901  | -0.77052  | -1.785042 |
| Free Energy = -1473.195054 Hartree |           |           |           | Free Energy = -1473.194394 Hartree |           |           |           |

| conf. 2a-7 | X axis(Å) | Y axis(Å) | Z axis(Å) | conf. 2a-8 | X axis(Å) | Y axis(Å) | Z axis(Å) |
|------------|-----------|-----------|-----------|------------|-----------|-----------|-----------|
| C          | 0.110963  | -3.255811 | 0.5878    | C          | 0.110655  | -3.255777 | 0.587107  |
| C          | 1.433852  | -3.094866 | 0.124963  | C          | 1.433617  | -3.094879 | 0.124461  |
| C          | 1.941472  | -1.844557 | -0.232642 | C          | 1.94136   | -1.844552 | -0.232887 |
| C          | 1.056488  | -0.755603 | -0.116099 | C          | 1.05642   | -0.755557 | -0.116297 |
| C          | -0.291751 | -0.896006 | 0.302445  | C          | -0.291869 | -0.895895 | 0.30204   |
| C          | -0.753752 | -2.171957 | 0.682826  | C          | -0.754001 | -2.171871 | 0.68218   |
| N          | 1.273558  | 0.589971  | -0.357334 | N          | 1.273594  | 0.590024  | -0.357541 |
| C          | 0.123436  | 1.312627  | -0.103527 | C          | 0.123523  | 1.312787  | -0.103715 |
| C          | -0.88121  | 0.429522  | 0.294739  | C          | -0.881225 | 0.42973   | 0.294386  |
| C          | -2.234033 | 0.794529  | 0.701865  | C          | -2.234044 | 0.794817  | 0.701469  |
| C          | -3.386873 | 0.155499  | 0.396264  | C          | -3.386926 | 0.155868  | 0.395846  |



|   |           |           |           |   |           |           |           |
|---|-----------|-----------|-----------|---|-----------|-----------|-----------|
| C | -4.675691 | 0.666231  | 0.949862  | C | -4.675745 | 0.666718  | 0.949363  |
| N | -5.790477 | -0.042328 | 0.58572   | N | -5.790457 | -0.042191 | 0.585655  |
| C | -5.818631 | -1.396603 | 0.033198  | C | -5.818235 | -1.396884 | 0.03408   |
| C | -4.559594 | -1.693204 | -0.785383 | C | -4.559604 | -1.693142 | -0.785279 |
| N | -3.464507 | -0.924562 | -0.505144 | N | -3.464618 | -0.924126 | -0.505628 |
| C | 0.099423  | 2.832752  | -0.245158 | C | 0.099679  | 2.832951  | -0.245274 |
| C | -1.227466 | 3.2674    | -0.856906 | C | -1.227138 | 3.267799  | -0.857022 |
| C | -2.046138 | 4.225402  | -0.416256 | C | -2.045659 | 4.225935  | -0.416377 |
| C | 1.205998  | 3.316374  | -1.221918 | C | 1.206305  | 3.316543  | -1.221989 |
| C | 0.351151  | 3.467325  | 1.143545  | C | 0.351445  | 3.467426  | 1.143474  |
| C | -7.084606 | -1.610716 | -0.798807 | C | -7.084711 | -1.612285 | -0.796768 |
| C | 3.367779  | -1.646597 | -0.690608 | C | 3.367686  | -1.646531 | -0.690751 |
| C | 4.240654  | -1.018267 | 0.414038  | C | 4.240594  | -1.018699 | 0.414152  |
| C | 5.566558  | -0.380772 | -0.054517 | C | 5.566497  | -0.381028 | -0.054172 |
| C | 6.523535  | -1.382039 | -0.71056  | C | 6.523459  | -1.382021 | -0.710653 |
| C | 5.313067  | 0.806938  | -0.993873 | C | 5.312979  | 0.80705   | -0.99304  |
| O | 4.326829  | 1.713441  | -0.490159 | O | 4.32668   | 1.713293  | -0.489052 |
| O | 4.601075  | -1.988837 | 1.410853  | O | 4.601012  | -1.989677 | 1.410563  |
| O | 6.184955  | 0.213542  | 1.103815  | O | 6.18493   | 0.212785  | 1.10438   |
| O | -4.52534  | -2.600844 | -1.608952 | O | -4.525528 | -2.600747 | -1.608877 |
| O | -4.749778 | 1.675113  | 1.650358  | O | -4.749875 | 1.675875  | 1.649452  |
| H | -0.236602 | -4.24685  | 0.866958  | H | -0.23704  | -4.246829 | 0.866061  |
| H | 2.076811  | -3.967944 | 0.034193  | H | 2.076497  | -3.968012 | 0.033624  |
| H | -1.76553  | -2.309325 | 1.051093  | H | -1.765828 | -2.309265 | 1.050292  |
| H | 2.170926  | 1.004385  | -0.589716 | H | 2.17112   | 1.004472  | -0.58927  |
| H | -2.373262 | 1.685362  | 1.305013  | H | -2.37323  | 1.685713  | 1.304521  |
| H | -6.645921 | 0.299933  | 1.010931  | H | -6.645983 | 0.300165  | 1.010629  |
| H | -5.814046 | -2.134551 | 0.85471   | H | -5.812493 | -2.134281 | 0.85609   |
| H | -2.627512 | -1.167808 | -1.027408 | H | -2.627795 | -1.167077 | -1.028304 |
| H | -1.478891 | 2.748954  | -1.783347 | H | -1.47861  | 2.749451  | -1.783504 |
| H | -2.951614 | 4.476717  | -0.961858 | H | -2.951085 | 4.477395  | -0.961994 |
| H | -1.872025 | 4.776593  | 0.503936  | H | -1.871469 | 4.777085  | 0.503821  |
| H | 2.214759  | 3.089194  | -0.860195 | H | 2.215052  | 3.089359  | -0.860227 |
| H | 1.131547  | 4.402658  | -1.334413 | H | 1.131883  | 4.402834  | -1.334464 |
| H | 1.087354  | 2.867594  | -2.215028 | H | 1.087684  | 2.867771  | -2.215097 |
| H | -0.433119 | 3.199911  | 1.858873  | H | -0.432789 | 3.199919  | 1.858803  |
| H | 0.392148  | 4.560046  | 1.06888   | H | 0.392417  | 4.560162  | 1.068922  |
| H | 1.309007  | 3.122505  | 1.548569  | H | 1.309332  | 3.122606  | 1.548432  |
| H | -7.9758   | -1.473014 | -0.175018 | H | -7.975516 | -1.474845 | -0.172362 |
| H | -7.125384 | -0.899678 | -1.630539 | H | -7.126609 | -0.901737 | -1.628868 |
| H | -7.094294 | -2.624686 | -1.204717 | H | -7.094054 | -2.626466 | -1.202146 |
| H | 3.806476  | -2.606086 | -0.985484 | H | 3.806292  | -2.605934 | -0.986024 |
| H | 3.376657  | -1.003316 | -1.580159 | H | 3.376567  | -1.002857 | -1.580009 |

|                                    |          |           |           |                                    |          |           |           |
|------------------------------------|----------|-----------|-----------|------------------------------------|----------|-----------|-----------|
| H                                  | 3.671814 | -0.219679 | 0.903312  | H                                  | 3.671741 | -0.220302 | 0.903722  |
| H                                  | 7.463589 | -0.881993 | -0.966914 | H                                  | 7.46359  | -0.881872 | -0.966561 |
| H                                  | 6.096053 | -1.809266 | -1.625526 | H                                  | 6.096118 | -1.808703 | -1.625936 |
| H                                  | 6.745203 | -2.203433 | -0.022847 | H                                  | 6.744976 | -2.203812 | -0.023366 |
| H                                  | 4.94792  | 0.473491  | -1.967809 | H                                  | 4.94788  | 0.473973  | -1.967121 |
| H                                  | 6.266053 | 1.330197  | -1.147061 | H                                  | 6.265946 | 1.330414  | -1.145995 |
| H                                  | 4.644843 | 2.017672  | 0.377575  | H                                  | 4.644628 | 2.017316  | 0.378769  |
| H                                  | 3.789995 | -2.295461 | 1.848241  | H                                  | 3.789997 | -2.29618  | 1.848146  |
| H                                  | 6.12311  | -0.438619 | 1.82398   | H                                  | 6.123022 | -0.439649 | 1.824288  |
| Free Energy = -1473.194236 Hartree |          |           |           | Free Energy = -1473.194224 Hartree |          |           |           |

**Table S17.** The Cartesian coordinates of the lowest energy conformers (Conf. 1-7) for isomer **2b**.

| conf. 2b-1 | X axis(Å) | Y axis(Å) | Z axis(Å) | conf. 2b-2 | X axis(Å) | Y axis(Å) | Z axis(Å) |
|------------|-----------|-----------|-----------|------------|-----------|-----------|-----------|
| C          | -0.162019 | -2.875702 | -1.544915 | C          | -0.089921 | -3.199038 | -0.735288 |
| C          | -1.529082 | -2.581669 | -1.367809 | C          | -1.412665 | -3.06301  | -0.264795 |
| C          | -1.974418 | -1.31419  | -0.985678 | C          | -1.920942 | -1.834071 | 0.160387  |
| C          | -0.969245 | -0.356221 | -0.756535 | C          | -1.035934 | -0.740252 | 0.10466   |
| C          | 0.417655  | -0.629537 | -0.901538 | C          | 0.313465  | -0.859092 | -0.31819  |
| C          | 0.814982  | -1.910705 | -1.33102  | C          | 0.775083  | -2.112155 | -0.769347 |
| N          | -1.091741 | 0.978037  | -0.423552 | N          | -1.253033 | 0.592187  | 0.414767  |
| C          | 0.14888   | 1.56704   | -0.335306 | C          | -0.102142 | 1.325841  | 0.201337  |
| C          | 1.124298  | 0.606915  | -0.620551 | C          | 0.904807  | 0.461988  | -0.236843 |
| C          | 2.559195  | 0.8461    | -0.68052  | C          | 2.264542  | 0.854316  | -0.582498 |
| C          | 3.557746  | 0.040584  | -0.248072 | C          | 3.41473   | 0.196825  | -0.303493 |
| C          | 4.97398   | 0.467561  | -0.436264 | C          | 4.714822  | 0.767114  | -0.76606  |
| N          | 5.916815  | -0.41012  | 0.032784  | N          | 5.822168  | 0.021328  | -0.459045 |
| C          | 5.705674  | -1.822365 | 0.350161  | C          | 5.837486  | -1.385876 | -0.059618 |
| C          | 4.278416  | -2.075647 | 0.842904  | C          | 4.569509  | -1.758004 | 0.713234  |
| N          | 3.342586  | -1.152166 | 0.472266  | N          | 3.479337  | -0.96215  | 0.495651  |
| C          | 0.296022  | 3.050184  | -0.002523 | C          | -0.041284 | 2.829844  | 0.468602  |
| C          | 1.342947  | 3.219155  | 1.092576  | C          | 0.229099  | 3.530977  | -0.860396 |
| C          | 2.412515  | 4.017778  | 1.075909  | C          | 1.243733  | 4.347432  | -1.157458 |
| C          | -1.031075 | 3.624317  | 0.559662  | C          | 1.038404  | 3.124627  | 1.534123  |
| C          | 0.646669  | 3.824709  | -1.295601 | C          | -1.393456 | 3.365166  | 0.999399  |
| C          | 6.738188  | -2.302068 | 1.372091  | C          | 7.095358  | -1.699104 | 0.752522  |
| C          | -3.45917  | -1.007798 | -0.913924 | C          | -3.348336 | -1.667757 | 0.627477  |
| C          | -3.993617 | -0.529905 | 0.448301  | C          | -4.23026  | -1.005267 | -0.448869 |
| C          | -5.505486 | -0.79051  | 0.685192  | C          | -5.580619 | -0.44076  | 0.042976  |
| O          | -5.791113 | -0.047962 | 1.888608  | C          | -6.512885 | -1.512054 | 0.619435  |
| C          | -6.37133  | -0.213957 | -0.447493 | C          | -5.373729 | 0.688639  | 1.06213   |
| O          | -7.722769 | -0.199621 | 0.038634  | O          | -4.403793 | 1.650377  | 0.638392  |

|                                 |           |           |           |                                |           |           |           |
|---------------------------------|-----------|-----------|-----------|--------------------------------|-----------|-----------|-----------|
| O                               | -3.74291  | 0.881178  | 0.552373  | O                              | -4.550042 | -1.927612 | -1.503528 |
| C                               | -5.798882 | -2.275753 | 0.927624  | O                              | -6.205006 | 0.208816  | -1.082017 |
| O                               | 3.988478  | -3.075493 | 1.49165   | O                              | 4.523407  | -2.741358 | 1.443913  |
| O                               | 5.289219  | 1.546961  | -0.937565 | O                              | 4.803167  | 1.851298  | -1.341736 |
| H                               | 0.128074  | -3.872977 | -1.864891 | H                              | 0.257328  | -4.173354 | -1.068472 |
| H                               | -2.264144 | -3.360711 | -1.559512 | H                              | -2.055645 | -3.939629 | -0.221554 |
| H                               | 1.861191  | -2.142889 | -1.503053 | H                              | 1.786932  | -2.229039 | -1.144294 |
| H                               | -1.967272 | 1.36787   | -0.085113 | H                              | -2.149384 | 0.993283  | 0.671815  |
| H                               | 2.910451  | 1.787603  | -1.089005 | H                              | 2.404834  | 1.797713  | -1.102147 |
| H                               | 6.870785  | -0.115896 | -0.148855 | H                              | 6.687483  | 0.409163  | -0.82024  |
| H                               | 5.812927  | -2.431055 | -0.565058 | H                              | 5.833228  | -2.028926 | -0.957402 |
| H                               | 2.39496   | -1.359906 | 0.774307  | H                              | 2.634701  | -1.254411 | 0.978847  |
| H                               | 1.143363  | 2.62881   | 1.988499  | H                              | -0.522374 | 3.328894  | -1.62611  |
| H                               | 3.076875  | 4.075356  | 1.934004  | H                              | 1.32195   | 4.802473  | -2.141422 |
| H                               | 2.687359  | 4.620336  | 0.214507  | H                              | 2.037239  | 4.583583  | -0.45397  |
| H                               | -1.843121 | 3.563936  | -0.17515  | H                              | 0.794566  | 2.602422  | 2.465971  |
| H                               | -0.888014 | 4.680003  | 0.810486  | H                              | 1.078396  | 4.1989    | 1.747997  |
| H                               | -1.345061 | 3.104249  | 1.472242  | H                              | 2.032335  | 2.798996  | 1.216625  |
| H                               | 1.598934  | 3.499775  | -1.724618 | H                              | -2.210057 | 3.224582  | 0.283531  |
| H                               | 0.711212  | 4.900666  | -1.095585 | H                              | -1.30332  | 4.439831  | 1.18638   |
| H                               | -0.132977 | 3.666065  | -2.04854  | H                              | -1.677732 | 2.88292   | 1.942123  |
| H                               | 7.751917  | -2.183113 | 0.971286  | H                              | 7.992292  | -1.503122 | 0.153031  |
| H                               | 6.658044  | -1.726679 | 2.300249  | H                              | 7.135136  | -1.081904 | 1.656086  |
| H                               | 6.572645  | -3.357456 | 1.599572  | H                              | 7.093945  | -2.750717 | 1.047553  |
| H                               | -3.718372 | -0.238309 | -1.655731 | H                              | -3.775771 | -2.643071 | 0.884385  |
| H                               | -3.993321 | -1.917102 | -1.207262 | H                              | -3.363559 | -1.05953  | 1.541095  |
| H                               | -3.456427 | -1.04609  | 1.257051  | H                              | -3.683283 | -0.16147  | -0.884551 |
| H                               | -6.861083 | -2.415737 | 1.151138  | H                              | -7.472047 | -1.059286 | 0.892446  |
| H                               | -5.21507  | -2.637176 | 1.780192  | H                              | -6.084108 | -1.982929 | 1.512136  |
| H                               | -5.55703  | -2.889649 | 0.052701  | H                              | -6.698537 | -2.294664 | -0.122093 |
| H                               | -6.296935 | -0.839169 | -1.3463   | H                              | -5.016387 | 0.299616  | 2.018241  |
| H                               | -6.038096 | 0.803393  | -0.684186 | H                              | -6.343351 | 1.174917  | 1.233026  |
| H                               | -8.274256 | 0.335176  | -0.550986 | H                              | -4.725013 | 2.01723   | -0.203292 |
| H                               | -4.251398 | 1.18301   | 1.328512  | H                              | -3.724914 | -2.18794  | -1.944737 |
| H                               | -6.754092 | 0.097015  | 1.908988  | H                              | -6.119246 | -0.394234 | -1.841374 |
| Free Energy = -1473.195332 a.u. |           |           |           | Free Energy = -1473.19394 a.u. |           |           |           |

| conf. 2b-3 | X axis(Å) | Y axis(Å) | Z axis(Å) | conf. 2b-4 | X axis(Å) | Y axis(Å) | Z axis(Å) |
|------------|-----------|-----------|-----------|------------|-----------|-----------|-----------|
| C          | -0.346757 | -2.064199 | 2.58795   | C          | 0.229281  | -3.102712 | -0.013025 |
| C          | -1.717418 | -1.782741 | 2.411719  | C          | 1.477877  | -2.866863 | -0.623594 |
| C          | -2.168339 | -0.640543 | 1.744783  | C          | 1.924945  | -1.580807 | -0.937918 |
| C          | -1.163553 | 0.210993  | 1.246572  | C          | 1.038046  | -0.533705 | -0.62189  |

|   |           |           |           |   |           |           |           |
|---|-----------|-----------|-----------|---|-----------|-----------|-----------|
| C | 0.224055  | -0.052936 | 1.399001  | C | -0.247615 | -0.74354  | -0.053382 |
| C | 0.630504  | -1.205658 | 2.098493  | C | -0.637791 | -2.056044 | 0.27788   |
| N | -1.27417  | 1.423788  | 0.603312  | N | 1.196684  | 0.827829  | -0.777088 |
| C | -0.027408 | 1.945456  | 0.327998  | C | 0.086727  | 1.499652  | -0.320342 |
| C | 0.940745  | 1.057996  | 0.801032  | C | -0.854614 | 0.563132  | 0.120796  |
| C | 2.398225  | 1.178198  | 0.732458  | C | -2.156677 | 0.855877  | 0.705992  |
| C | 3.245821  | 0.239529  | 0.25418   | C | -3.329673 | 0.216584  | 0.486662  |
| C | 4.718184  | 0.477462  | 0.297763  | C | -4.553027 | 0.668098  | 1.212672  |
| N | 5.493658  | -0.506794 | -0.250784 | N | -5.693488 | -0.034872 | 0.932557  |
| C | 5.069952  | -1.653558 | -1.052286 | C | -5.777589 | -1.342149 | 0.281501  |
| C | 3.563866  | -1.903145 | -0.971801 | C | -4.608755 | -1.567794 | -0.681208 |
| N | 2.809156  | -0.96846  | -0.323979 | N | -3.496135 | -0.80154  | -0.471602 |
| C | 0.055216  | 3.230341  | -0.494275 | C | 0.047309  | 3.028365  | -0.345888 |
| C | -1.069402 | 4.156774  | -0.044522 | C | 1.15844   | 3.547488  | -1.249773 |
| C | -2.072094 | 4.637557  | -0.785138 | C | 2.184348  | 4.333286  | -0.910785 |
| C | -0.047506 | 2.862716  | -1.994166 | C | 0.175556  | 3.565575  | 1.098295  |
| C | 1.382485  | 3.991147  | -0.260417 | C | -1.28618  | 3.530888  | -0.966142 |
| C | 5.850722  | -2.913754 | -0.656163 | C | -7.121333 | -1.498973 | -0.433856 |
| C | -3.649698 | -0.322142 | 1.669422  | C | 3.246192  | -1.37885  | -1.657259 |
| C | -4.357421 | -0.245281 | 0.304651  | C | 4.383736  | -0.577326 | -0.99836  |
| C | -4.313524 | -1.481435 | -0.631826 | C | 4.9033    | -1.019911 | 0.393643  |
| O | -5.067    | -1.027452 | -1.77924  | O | 5.943067  | -0.051106 | 0.65872   |
| C | -2.899202 | -1.848477 | -1.114902 | C | 3.857217  | -0.902474 | 1.516187  |
| O | -3.078839 | -2.701298 | -2.260373 | O | 4.594503  | -0.940967 | 2.752819  |
| O | -3.886815 | 0.91626   | -0.390544 | O | 4.011564  | 0.80642   | -0.970095 |
| C | -5.017928 | -2.689103 | -0.001828 | C | 5.513033  | -2.425974 | 0.343548  |
| O | 3.062964  | -2.892888 | -1.496916 | O | -4.65559  | -2.422556 | -1.558639 |
| O | 5.214319  | 1.479523  | 0.811841  | O | -4.557555 | 1.633115  | 1.977525  |
| H | -0.055481 | -2.960078 | 3.129897  | H | -0.061116 | -4.123102 | 0.222834  |
| H | -2.451814 | -2.46865  | 2.829255  | H | 2.113465  | -3.716515 | -0.864505 |
| H | 1.68367   | -1.412729 | 2.266597  | H | -1.592838 | -2.251637 | 0.755413  |
| H | -2.151479 | 1.770263  | 0.224938  | H | 2.09276   | 1.252449  | -1.008097 |
| H | 2.885177  | 2.073442  | 1.105001  | H | -2.243357 | 1.690166  | 1.395961  |
| H | 6.487688  | -0.305292 | -0.220643 | H | -6.50251  | 0.271064  | 1.463124  |
| H | 5.26706   | -1.446474 | -2.116522 | H | -5.69135  | -2.140969 | 1.038675  |
| H | 1.810279  | -1.155961 | -0.320284 | H | -2.717358 | -0.999598 | -1.093705 |
| H | -1.006783 | 4.452347  | 1.00432   | H | 1.060159  | 3.247556  | -2.294915 |
| H | -2.807834 | 5.312593  | -0.355383 | H | 2.900033  | 4.666208  | -1.65825  |
| H | -2.203179 | 4.387731  | -1.834715 | H | 2.352401  | 4.678713  | 0.105762  |
| H | 0.780952  | 2.203111  | -2.272407 | H | -0.645336 | 3.19962   | 1.721455  |
| H | 0.009293  | 3.76235   | -2.618176 | H | 0.137807  | 4.661053  | 1.106087  |
| H | -0.984178 | 2.34257   | -2.222811 | H | 1.115485  | 3.247386  | 1.56254   |
| H | 1.537542  | 4.216433  | 0.800629  | H | -1.41485  | 3.145825  | -1.984019 |

|                                    |           |           |           |                                    |           |           |           |
|------------------------------------|-----------|-----------|-----------|------------------------------------|-----------|-----------|-----------|
| H                                  | 1.352332  | 4.940418  | -0.806297 | H                                  | -1.277759 | 4.625793  | -1.012305 |
| H                                  | 2.24391   | 3.422726  | -0.621853 | H                                  | -2.151765 | 3.219461  | -0.376131 |
| H                                  | 6.925896  | -2.752347 | -0.79733  | H                                  | -7.945389 | -1.412623 | 0.28433   |
| H                                  | 5.67218   | -3.163659 | 0.39507   | H                                  | -7.242266 | -0.727091 | -1.201053 |
| H                                  | 5.537443  | -3.754492 | -1.279841 | H                                  | -7.174619 | -2.479436 | -0.912156 |
| H                                  | -4.188822 | -1.056221 | 2.278167  | H                                  | 3.647471  | -2.365735 | -1.912884 |
| H                                  | -3.832785 | 0.652359  | 2.145311  | H                                  | 3.059209  | -0.875352 | -2.616791 |
| H                                  | -5.426085 | -0.096141 | 0.524685  | H                                  | 5.251806  | -0.677374 | -1.668219 |
| H                                  | -5.075515 | -3.507223 | -0.726387 | H                                  | 5.971222  | -2.669188 | 1.307205  |
| H                                  | -6.037171 | -2.421432 | 0.296896  | H                                  | 6.28814   | -2.475749 | -0.428738 |
| H                                  | -4.475462 | -3.055393 | 0.876998  | H                                  | 4.751757  | -3.185098 | 0.131096  |
| H                                  | -2.344976 | -2.372478 | -0.330593 | H                                  | 3.14289   | -1.729875 | 1.471915  |
| H                                  | -2.352777 | -0.941982 | -1.39862  | H                                  | 3.316483  | 0.046301  | 1.427091  |
| H                                  | -2.215137 | -2.898921 | -2.651833 | H                                  | 3.996158  | -0.742624 | 3.48792   |
| H                                  | -4.310025 | 0.886915  | -1.268357 | H                                  | 4.721694  | 1.264807  | -0.484251 |
| H                                  | -4.808609 | -1.597865 | -2.525879 | H                                  | 6.087725  | -0.054548 | 1.622355  |
| Free Energy = -1473.193646 Hartree |           |           |           | Free Energy = -1473.192894 Hartree |           |           |           |

| conf. 2b-5 | X axis(Å) | Y axis(Å) | Z axis(Å) | conf. 2b-6 | X axis(Å) | Y axis(Å) | Z axis(Å) |
|------------|-----------|-----------|-----------|------------|-----------|-----------|-----------|
| C          | 0.209201  | -3.089459 | 0.071796  | C          | 0.152832  | -3.261188 | -0.559316 |
| C          | 1.438959  | -2.85295  | -0.576117 | C          | -1.1666   | -3.126557 | -0.076943 |
| C          | 1.881931  | -1.567212 | -0.897457 | C          | -1.724977 | -1.879123 | 0.206639  |
| C          | 1.008707  | -0.5177   | -0.549557 | C          | -0.892903 | -0.762494 | -0.005549 |
| C          | -0.25498  | -0.729013 | 0.063728  | C          | 0.449316  | -0.873047 | -0.447825 |
| C          | -0.642836 | -2.040838 | 0.397323  | C          | 0.964103  | -2.148897 | -0.749918 |
| N          | 1.160842  | 0.843026  | -0.702864 | N          | -1.15817  | 0.583004  | 0.149995  |
| C          | 0.067623  | 1.51577   | -0.196782 | C          | -0.044739 | 1.339513  | -0.171875 |
| C          | -0.856682 | 0.576715  | 0.26969   | C          | 0.987271  | 0.473188  | -0.536569 |
| C          | -2.166369 | 0.820996  | 0.871054  | C          | 2.345227  | 0.805102  | -0.97019  |
| C          | -3.325759 | 0.188942  | 0.575587  | C          | 3.491197  | 0.244013  | -0.522422 |
| C          | -4.567228 | 0.553178  | 1.321504  | C          | 4.796766  | 0.681343  | -1.102898 |
| N          | -5.69526  | -0.127989 | 0.953084  | N          | 5.904439  | 0.066751  | -0.585896 |
| C          | -5.766234 | -1.352317 | 0.156195  | C          | 5.941306  | -1.150843 | 0.223773  |
| C          | -4.56209  | -1.493211 | -0.777916 | C          | 4.636464  | -1.359946 | 0.995817  |
| N          | -3.460235 | -0.745466 | -0.468839 | N          | 3.542123  | -0.679812 | 0.538186  |
| C          | 0.031785  | 3.035273  | -0.358562 | C          | -0.146562 | 2.855756  | -0.005834 |
| C          | 1.394387  | 3.585694  | 0.051241  | C          | -0.417902 | 3.126849  | 1.472994  |
| C          | 2.26404   | 4.257271  | -0.708857 | C          | -1.492847 | 3.711364  | 2.009625  |
| C          | -1.013466 | 3.711571  | 0.558633  | C          | -1.26805  | 3.40035   | -0.921871 |
| C          | -0.319127 | 3.362196  | -1.830096 | C          | 1.165512  | 3.585066  | -0.37215  |
| C          | -7.080945 | -1.408045 | -0.626433 | C          | 7.145139  | -1.13129  | 1.169442  |
| C          | 3.179247  | -1.368668 | -1.660253 | C          | -3.144822 | -1.711592 | 0.69634   |

|                                    |           |           |           |                                    |           |           |           |
|------------------------------------|-----------|-----------|-----------|------------------------------------|-----------|-----------|-----------|
| C                                  | 4.339785  | -0.570575 | -1.038664 | C                                  | -4.073739 | -1.171882 | -0.408891 |
| C                                  | 4.90445   | -1.016076 | 0.334772  | C                                  | -5.417227 | -0.580006 | 0.070076  |
| O                                  | 5.954036  | -0.049372 | 0.567146  | C                                  | -6.296331 | -1.593161 | 0.811355  |
| C                                  | 3.896258  | -0.899068 | 1.491485  | C                                  | -5.202013 | 0.67266   | 0.932225  |
| O                                  | 4.67407   | -0.93793  | 2.703114  | O                                  | -4.314052 | 1.61464   | 0.325015  |
| O                                  | 3.970682  | 0.813287  | -0.996498 | O                                  | -4.41308  | -2.202014 | -1.353017 |
| C                                  | 5.509814  | -2.423068 | 0.26297   | O                                  | -6.103236 | -0.086124 | -1.097708 |
| O                                  | -4.575665 | -2.27238  | -1.724183 | O                                  | 4.571576  | -2.134044 | 1.943853  |
| O                                  | -4.594651 | 1.435649  | 2.179314  | O                                  | 4.883313  | 1.563769  | -1.956083 |
| H                                  | -0.077714 | -4.110741 | 0.307953  | H                                  | 0.539633  | -4.253359 | -0.775686 |
| H                                  | 2.0628    | -3.703483 | -0.843452 | H                                  | -1.765843 | -4.019309 | 0.089852  |
| H                                  | -1.585771 | -2.23209  | 0.900658  | H                                  | 1.975464  | -2.263221 | -1.12826  |
| H                                  | 2.050467  | 1.270328  | -0.953373 | H                                  | -2.046413 | 0.982236  | 0.437909  |
| H                                  | -2.265865 | 1.578101  | 1.640782  | H                                  | 2.494831  | 1.567375  | -1.726652 |
| H                                  | -6.51661  | 0.119997  | 1.494897  | H                                  | 6.773725  | 0.36111   | -1.01879  |
| H                                  | -5.721636 | -2.231136 | 0.822434  | H                                  | 6.032597  | -2.031284 | -0.435533 |
| H                                  | -2.656353 | -0.901082 | -1.070933 | H                                  | 2.677224  | -0.880828 | 1.032718  |
| H                                  | 1.6456    | 3.406954  | 1.098732  | H                                  | 0.385606  | 2.796712  | 2.133897  |
| H                                  | 3.199783  | 4.623848  | -0.294084 | H                                  | -1.56405  | 3.862726  | 3.083942  |
| H                                  | 2.085827  | 4.472728  | -1.758932 | H                                  | -2.336632 | 4.05422   | 1.417343  |
| H                                  | -2.033397 | 3.413066  | 0.300894  | H                                  | -1.045178 | 3.161134  | -1.967334 |
| H                                  | -0.940112 | 4.798092  | 0.440513  | H                                  | -1.335397 | 4.490151  | -0.828801 |
| H                                  | -0.840241 | 3.477012  | 1.61474   | H                                  | -2.248917 | 2.981801  | -0.677981 |
| H                                  | 0.406375  | 2.931958  | -2.52814  | H                                  | 2.016755  | 3.22649   | 0.214135  |
| H                                  | -0.351658 | 4.44671   | -1.987295 | H                                  | 1.042429  | 4.6546    | -0.170359 |
| H                                  | -1.304595 | 2.953109  | -2.075733 | H                                  | 1.406285  | 3.47026   | -1.433683 |
| H                                  | -7.93329  | -1.385797 | 0.062996  | H                                  | 8.076637  | -1.060949 | 0.59534   |
| H                                  | -7.160117 | -0.555384 | -1.308902 | H                                  | 7.087928  | -0.275467 | 1.850195  |
| H                                  | -7.125887 | -2.330221 | -1.210048 | H                                  | 7.166266  | -2.049318 | 1.76088   |
| H                                  | 3.568937  | -2.356509 | -1.929657 | H                                  | -3.536815 | -2.670519 | 1.052407  |
| H                                  | 2.96218   | -0.863494 | -2.61256  | H                                  | -3.152769 | -1.024422 | 1.552683  |
| H                                  | 5.185073  | -0.671418 | -1.73705  | H                                  | -3.556955 | -0.369476 | -0.947278 |
| H                                  | 6.000039  | -2.667651 | 1.210388  | H                                  | -7.25811  | -1.133768 | 1.062777  |
| H                                  | 6.258193  | -2.473814 | -0.535158 | H                                  | -5.822336 | -1.93673  | 1.738571  |
| H                                  | 4.740323  | -3.180678 | 0.076318  | H                                  | -6.484683 | -2.467372 | 0.181105  |
| H                                  | 3.18152   | -1.726954 | 1.470393  | H                                  | -4.763502 | 0.420701  | 1.900392  |
| H                                  | 3.352651  | 0.049599  | 1.420742  | H                                  | -6.182277 | 1.134552  | 1.111348  |
| H                                  | 4.099323  | -0.744745 | 3.458148  | H                                  | -4.689807 | 1.820855  | -0.548738 |
| H                                  | 4.696481  | 1.270429  | -0.533414 | H                                  | -3.600111 | -2.488868 | -1.800028 |
| H                                  | 6.129639  | -0.054218 | 1.525623  | H                                  | -6.01901  | -0.77052  | -1.785042 |
| Free Energy = -1473.192394 Hartree |           |           |           | Free Energy = -1473.192391 Hartree |           |           |           |

| conf. 2b-7 | X axis(Å) | Y axis(Å) | Z axis(Å) |
|------------|-----------|-----------|-----------|
| C          | 0.523788  | -3.085125 | 0.015244  |
| C          | 1.756855  | -2.792996 | -0.602877 |
| C          | 2.131067  | -1.489896 | -0.940818 |
| C          | 1.18732   | -0.489307 | -0.642096 |
| C          | -0.083636 | -0.756352 | -0.06519  |
| C          | -0.399341 | -2.082758 | 0.290188  |
| N          | 1.276985  | 0.875309  | -0.821146 |
| C          | 0.137972  | 1.497439  | -0.364613 |
| C          | -0.755428 | 0.52101   | 0.088707  |
| C          | -2.074176 | 0.773699  | 0.652     |
| C          | -3.2111   | 0.061127  | 0.471915  |
| C          | -4.454993 | 0.483215  | 1.179191  |
| N          | -5.558119 | -0.292494 | 0.9368    |
| C          | -5.565717 | -1.641544 | 0.371209  |
| C          | -4.394647 | -1.850421 | -0.592466 |
| N          | -3.325638 | -1.014691 | -0.43087  |
| C          | -0.00271  | 3.018423  | -0.40558  |
| C          | -1.313942 | 3.37728   | -1.096758 |
| C          | -2.290941 | 4.15817   | -0.630162 |
| C          | 1.1321    | 3.655591  | -1.249805 |
| C          | 0.093109  | 3.581543  | 1.032129  |
| C          | -6.903967 | -1.928187 | -0.313041 |
| C          | 3.43738   | -1.22254  | -1.666519 |
| C          | 4.527982  | -0.342885 | -1.027949 |
| C          | 5.073205  | -0.723432 | 0.372652  |
| O          | 6.051229  | 0.313362  | 0.616142  |
| C          | 4.021852  | -0.647563 | 1.494144  |
| O          | 4.761022  | -0.610336 | 2.72935   |
| O          | 4.086032  | 1.023304  | -1.02773  |
| C          | 5.769065  | -2.089573 | 0.351698  |
| O          | -4.400711 | -2.747922 | -1.428126 |
| O          | -4.511013 | 1.479478  | 1.900354  |
| H          | 0.290439  | -4.115299 | 0.271     |
| H          | 2.437776  | -3.610821 | -0.830009 |
| H          | -1.340442 | -2.322916 | 0.774753  |
| H          | 2.152645  | 1.325493  | -1.072372 |
| H          | -2.210636 | 1.650131  | 1.276116  |
| H          | -6.378001 | -0.008186 | 1.462714  |
| H          | -5.4203   | -2.384104 | 1.175467  |
| H          | -2.546063 | -1.193499 | -1.057379 |
| H          | -1.414603 | 2.952693  | -2.097042 |
| H          | -3.173195 | 4.362713  | -1.230846 |

|                                    |           |           |           |
|------------------------------------|-----------|-----------|-----------|
| H                                  | -2.272446 | 4.601608  | 0.361564  |
| H                                  | 2.1203    | 3.475171  | -0.808861 |
| H                                  | 0.983301  | 4.739032  | -1.292131 |
| H                                  | 1.136731  | 3.27725   | -2.278248 |
| H                                  | -0.703608 | 3.204724  | 1.679751  |
| H                                  | 0.034161  | 4.676055  | 1.021242  |
| H                                  | 1.052412  | 3.299932  | 1.480192  |
| H                                  | -7.723995 | -1.850067 | 0.41073   |
| H                                  | -7.082759 | -1.214834 | -1.124225 |
| H                                  | -6.899138 | -2.937849 | -0.72961  |
| H                                  | 3.897733  | -2.18841  | -1.902085 |
| H                                  | 3.220277  | -0.752392 | -2.636692 |
| H                                  | 5.398915  | -0.408471 | -1.697869 |
| H                                  | 6.241472  | -2.282181 | 1.319876  |
| H                                  | 6.545911  | -2.107864 | -0.420168 |
| H                                  | 5.05676   | -2.899244 | 0.157265  |
| H                                  | 3.36213   | -1.5199   | 1.469865  |
| H                                  | 3.420613  | 0.262078  | 1.385527  |
| H                                  | 4.151105  | -0.441956 | 3.462456  |
| H                                  | 4.777337  | 1.519968  | -0.551375 |
| H                                  | 6.193518  | 0.341694  | 1.579791  |
| Free Energy = -1473.192346 Hartree |           |           |           |

**Table S18.** The Cartesian coordinates of the lowest energy conformers (Conf. 1-8) for isomer **2c**.

| conf. 2c-1 | X axis(Å) | Y axis(Å) | Z axis(Å) | conf. 2c-2 | X axis(Å) | Y axis(Å) | Z axis(Å) |
|------------|-----------|-----------|-----------|------------|-----------|-----------|-----------|
| C          | -0.117872 | -3.01773  | -0.994049 | C          | -0.190752 | -2.817423 | -1.60481  |
| C          | -1.446486 | -2.80441  | -0.573995 | C          | 1.191757  | -2.600094 | -1.431739 |
| C          | -1.888359 | -1.566938 | -0.10132  | C          | 1.710903  | -1.363477 | -1.042405 |
| C          | -0.921011 | -0.544991 | -0.066464 | C          | 0.762875  | -0.350777 | -0.799783 |
| C          | 0.436299  | -0.741398 | -0.438109 | C          | -0.635655 | -0.544291 | -0.956534 |
| C          | 0.827876  | -2.001496 | -0.931928 | C          | -1.109631 | -1.798226 | -1.387062 |
| N          | -1.05894  | 0.778947  | 0.298194  | N          | 0.951143  | 0.968727  | -0.451335 |
| C          | 0.136014  | 1.444527  | 0.153421  | C          | -0.256799 | 1.628221  | -0.369326 |
| C          | 1.109109  | 0.533733  | -0.273221 | C          | -1.278887 | 0.726074  | -0.674848 |
| C          | 2.505457  | 0.853021  | -0.529318 | C          | -2.717846 | 0.978292  | -0.733668 |
| C          | 3.598237  | 0.104313  | -0.245485 | C          | -3.690069 | 0.23053   | -0.163091 |
| C          | 4.951837  | 0.617065  | -0.605874 | C          | -5.119191 | 0.615335  | -0.35654  |
| N          | 5.993735  | -0.219621 | -0.299965 | N          | -6.038527 | -0.173432 | 0.276751  |
| C          | 5.897262  | -1.650307 | -0.011071 | C          | -5.816184 | -1.421962 | 1.002637  |
| C          | 4.574535  | -1.986828 | 0.682761  | C          | -4.339025 | -1.678473 | 1.293856  |
| N          | 3.550261  | -1.106985 | 0.4749    | N          | -3.428763 | -0.869649 | 0.676213  |



|   |           |           |           |   |           |           |           |
|---|-----------|-----------|-----------|---|-----------|-----------|-----------|
| C | 0.260813  | 2.933451  | 0.472437  | C | -0.256189 | 3.072237  | 0.130547  |
| C | 0.66428   | 3.659852  | -0.807938 | C | 0.9463    | 3.785256  | -0.478692 |
| C | 1.739231  | 4.428782  | -1.001372 | C | 1.963457  | 4.36184   | 0.167899  |
| C | 1.271498  | 3.137673  | 1.623369  | C | -0.213286 | 3.057945  | 1.677888  |
| C | -1.101655 | 3.522693  | 0.916936  | C | -1.512467 | 3.855378  | -0.320947 |
| C | 7.094838  | -2.110494 | 0.821742  | C | -6.429136 | -2.629611 | 0.270107  |
| C | -3.315611 | -1.391504 | 0.384803  | C | 3.210614  | -1.144558 | -0.97143  |
| C | -4.170395 | -0.355658 | -0.368377 | C | 3.778336  | -0.771326 | 0.409428  |
| C | -5.702199 | -0.597214 | -0.299138 | C | 5.285602  | -1.090229 | 0.602264  |
| C | -6.132813 | -1.793509 | -1.156331 | C | 5.541463  | -2.596283 | 0.737942  |
| C | -6.197745 | -0.726353 | 1.151031  | C | 6.150367  | -0.461954 | -0.503414 |
| O | -7.626845 | -0.590461 | 1.107329  | O | 7.508656  | -0.51095  | -0.037902 |
| H | -3.900689 | -0.360112 | -1.434374 | H | 3.239063  | -1.326101 | 1.191151  |
| O | -6.259398 | 0.610978  | -0.856727 | O | 5.611701  | -0.441086 | 1.848352  |
| O | 4.433439  | -3.01065  | 1.343328  | O | -4.002987 | -2.591334 | 2.041238  |
| O | 5.139704  | 1.728844  | -1.100182 | O | -5.459436 | 1.593589  | -1.022696 |
| H | 0.168952  | -3.997311 | -1.367125 | H | -0.536797 | -3.796156 | -1.926477 |
| H | -2.15134  | -3.632334 | -0.61628  | H | 1.880959  | -3.418213 | -1.63114  |
| H | 1.843995  | -2.177584 | -1.270656 | H | -2.169547 | -1.965502 | -1.554724 |
| H | -1.968897 | 1.202568  | 0.458502  | H | 1.843025  | 1.333348  | -0.126406 |
| H | 2.732191  | 1.817869  | -0.973792 | H | -3.087896 | 1.834594  | -1.286883 |
| H | 6.89806   | 0.132369  | -0.596407 | H | -6.999479 | 0.108024  | 0.113657  |
| H | 5.888681  | -2.223205 | -0.955268 | H | -6.291893 | -1.338286 | 1.988484  |
| H | 2.666185  | -1.370951 | 0.900397  | H | -2.45674  | -1.0867   | 0.880048  |
| H | -0.036884 | 3.521267  | -1.632976 | H | 0.930845  | 3.825218  | -1.569407 |
| H | 2.489224  | 4.598409  | -0.233899 | H | 2.048506  | 4.36143   | 1.251336  |
| H | 1.915453  | 4.908017  | -1.960879 | H | 2.756676  | 4.86607   | -0.378448 |
| H | 0.933148  | 2.600572  | 2.516388  | H | -1.098086 | 2.545111  | 2.06859   |
| H | 1.353289  | 4.201069  | 1.876781  | H | -0.209985 | 4.08016   | 2.074338  |
| H | 2.267229  | 2.766765  | 1.365928  | H | 0.67226   | 2.536619  | 2.057407  |
| H | -0.977428 | 4.587095  | 1.140048  | H | -1.413683 | 4.900491  | -0.007882 |
| H | -1.476715 | 3.029379  | 1.821766  | H | -2.423515 | 3.454181  | 0.131193  |
| H | -1.862623 | 3.439139  | 0.1319    | H | -1.630265 | 3.839181  | -1.410212 |
| H | 7.011796  | -3.179031 | 1.032209  | H | -6.276082 | -3.53802  | 0.859636  |
| H | 7.134853  | -1.56875  | 1.772457  | H | -5.970015 | -2.761023 | -0.715929 |
| H | 8.028275  | -1.930897 | 0.274997  | H | -7.505953 | -2.478745 | 0.130728  |
| H | -3.319116 | -1.108314 | 1.447323  | H | 3.505548  | -0.351227 | -1.673606 |
| H | -3.801928 | -2.370083 | 0.320492  | H | 3.691081  | -2.064868 | -1.318236 |
| O | -3.879252 | 0.941066  | 0.178129  | O | 3.567263  | 0.633794  | 0.604998  |
| H | -7.221885 | -1.898864 | -1.131272 | H | 6.60215   | -2.778647 | 0.937006  |
| H | -5.823668 | -1.638906 | -2.195    | H | 4.958569  | -3.000423 | 1.571825  |
| H | -5.696876 | -2.73277  | -0.797789 | H | 5.273006  | -3.142025 | -0.173545 |
| H | -5.755422 | 0.067859  | 1.763889  | H | 5.838888  | 0.576076  | -0.669315 |

|                                    |           |           |           |                                    |          |           |           |
|------------------------------------|-----------|-----------|-----------|------------------------------------|----------|-----------|-----------|
| H                                  | -5.920501 | -1.703168 | 1.566999  | H                                  | 6.049087 | -1.025841 | -1.439381 |
| H                                  | -7.96875  | -0.465198 | 2.004672  | H                                  | 8.063811 | 0.051449  | -0.597593 |
| H                                  | -4.561962 | 1.538172  | -0.181818 | H                                  | 4.090258 | 0.87498   | 1.392018  |
| H                                  | -7.182057 | 0.664639  | -0.549189 | H                                  | 6.578301 | -0.32134  | 1.858767  |
| Free Energy = -1473.195526 Hartree |           |           |           | Free Energy = -1473.195426 Hartree |          |           |           |

| conf. 2c-3 | X axis(Å) | Y axis(Å) | Z axis(Å) | conf. 2c-4 | X axis(Å) | Y axis(Å) | Z axis(Å) |
|------------|-----------|-----------|-----------|------------|-----------|-----------|-----------|
| C          | 0.071215  | -2.833313 | -1.505492 | C          | -0.181261 | -2.866489 | -1.43381  |
| C          | 1.444489  | -2.543522 | -1.374767 | C          | 1.203826  | -2.637079 | -1.308497 |
| C          | 1.905542  | -1.286505 | -0.977223 | C          | 1.724187  | -1.390876 | -0.952028 |
| C          | 0.911179  | -0.335017 | -0.683595 | C          | 0.776184  | -0.382625 | -0.694108 |
| C          | -0.480607 | -0.604159 | -0.783346 | C          | -0.626246 | -0.589939 | -0.79298  |
| C          | -0.895722 | -1.874101 | -1.229436 | C          | -1.101505 | -1.852894 | -1.1958   |
| N          | 1.047861  | 0.990216  | -0.321764 | N          | 0.969074  | 0.94549   | -0.374097 |
| C          | -0.187644 | 1.577191  | -0.172243 | C          | -0.238227 | 1.593464  | -0.248515 |
| C          | -1.174577 | 0.625039  | -0.447461 | C          | -1.265846 | 0.680109  | -0.503    |
| C          | -2.609597 | 0.869674  | -0.441745 | C          | -2.693894 | 0.969313  | -0.553812 |
| C          | -3.587367 | 0.061791  | 0.032638  | C          | -3.704173 | 0.226456  | -0.044732 |
| C          | -5.011245 | 0.494978  | -0.072412 | C          | -5.112731 | 0.685284  | -0.226005 |
| N          | -5.933969 | -0.385524 | 0.426794  | N          | -6.071531 | -0.120241 | 0.325456  |
| C          | -5.712454 | -1.787662 | 0.77441   | C          | -5.900001 | -1.485904 | 0.817741  |
| C          | -4.256055 | -2.059394 | 1.143385  | C          | -4.456624 | -1.771408 | 1.226455  |
| N          | -3.335813 | -1.1446   | 0.7183    | N          | -3.500785 | -0.926395 | 0.738899  |
| C          | -0.328649 | 3.044038  | 0.231398  | C          | -0.276844 | 3.087169  | 0.076189  |
| C          | -0.961935 | 3.787331  | -0.941933 | C          | 1.048024  | 3.502287  | 0.704033  |
| C          | -2.096262 | 4.49293   | -0.940939 | C          | 1.939977  | 4.373128  | 0.223586  |
| C          | 1.057848  | 3.687939  | 0.483289  | C          | -1.371143 | 3.399196  | 1.132401  |
| C          | -1.154081 | 3.159123  | 1.531792  | C          | -0.576398 | 3.871816  | -1.222407 |
| C          | -6.164722 | -2.751297 | -0.340304 | C          | -6.380516 | -2.541175 | -0.197384 |
| C          | 3.392057  | -0.981762 | -0.953557 | C          | 3.223711  | -1.159744 | -0.934376 |
| C          | 3.978704  | -0.553919 | 0.403815  | C          | 3.833395  | -0.769157 | 0.423324  |
| C          | 5.498558  | -0.820888 | 0.572368  | C          | 5.348704  | -1.073743 | 0.570888  |
| C          | 5.801978  | -2.314247 | 0.743561  | C          | 5.621166  | -2.576228 | 0.713355  |
| C          | 6.321353  | -0.198103 | -0.568141 | C          | 6.173259  | -0.450222 | -0.567768 |
| O          | 7.689279  | -0.195663 | -0.130092 | O          | 7.545669  | -0.482582 | -0.143978 |
| H          | 3.473826  | -1.101143 | 1.212943  | H          | 3.32458   | -1.320674 | 1.227446  |
| O          | 5.82925   | -0.127062 | 1.792953  | O          | 5.70832   | -0.409173 | 1.799534  |
| O          | -3.941316 | -3.071934 | 1.760814  | O          | -4.182908 | -2.737638 | 1.930687  |
| O          | -5.346192 | 1.58465   | -0.538077 | O          | -5.402269 | 1.736935  | -0.797923 |
| H          | -0.231808 | -3.822176 | -1.839309 | H          | -0.530084 | -3.850907 | -1.734486 |
| H          | 2.170729  | -3.317125 | -1.615749 | H          | 1.893149  | -3.451579 | -1.521558 |
| H          | -1.948188 | -2.101549 | -1.366628 | H          | -2.163627 | -2.033297 | -1.32936  |

|                                    |           |           |           |                                    |           |           |           |
|------------------------------------|-----------|-----------|-----------|------------------------------------|-----------|-----------|-----------|
| H                                  | 1.936058  | 1.373437  | -0.010395 | H                                  | 1.869332  | 1.316155  | -0.080972 |
| H                                  | -2.965741 | 1.81887   | -0.832044 | H                                  | -3.02734  | 1.881431  | -1.040579 |
| H                                  | -6.893927 | -0.078367 | 0.310801  | H                                  | -7.019414 | 0.202554  | 0.161967  |
| H                                  | -6.287454 | -2.007574 | 1.68106   | H                                  | -6.48781  | -1.592047 | 1.736712  |
| H                                  | -2.3719   | -1.365555 | 0.952306  | H                                  | -2.546641 | -1.159359 | 1.000644  |
| H                                  | -0.388493 | 3.716738  | -1.86805  | H                                  | 1.248314  | 3.036719  | 1.671469  |
| H                                  | -2.728736 | 4.59322   | -0.063222 | H                                  | 1.814496  | 4.880274  | -0.729214 |
| H                                  | -2.443516 | 4.989246  | -1.843455 | H                                  | 2.84038   | 4.614142  | 0.783275  |
| H                                  | 1.588095  | 3.19178   | 1.305653  | H                                  | -2.371784 | 3.158879  | 0.765733  |
| H                                  | 0.921407  | 4.738306  | 0.759513  | H                                  | -1.345005 | 4.466103  | 1.381472  |
| H                                  | 1.693537  | 3.661407  | -0.40938  | H                                  | -1.202992 | 2.828068  | 2.052531  |
| H                                  | -1.247014 | 4.208991  | 1.833364  | H                                  | -0.613558 | 4.949016  | -1.022087 |
| H                                  | -0.65319  | 2.616491  | 2.341245  | H                                  | -1.544707 | 3.573729  | -1.635317 |
| H                                  | -2.158702 | 2.742578  | 1.42085   | H                                  | 0.184351  | 3.684755  | -1.987864 |
| H                                  | -6.011265 | -3.787473 | -0.023426 | H                                  | -6.263269 | -3.544458 | 0.223361  |
| H                                  | -5.601379 | -2.572518 | -1.263031 | H                                  | -5.807773 | -2.474689 | -1.129147 |
| H                                  | -7.229584 | -2.604946 | -0.555205 | H                                  | -7.439002 | -2.3819   | -0.433538 |
| H                                  | 3.622806  | -0.185204 | -1.675916 | H                                  | 3.48941   | -0.371134 | -1.653306 |
| H                                  | 3.913792  | -1.879046 | -1.300993 | H                                  | 3.699061  | -2.079961 | -1.288367 |
| O                                  | 3.731488  | 0.851585  | 0.569777  | O                                  | 3.616639  | 0.635876  | 0.61228   |
| H                                  | 6.871828  | -2.460203 | 0.922394  | H                                  | 6.688965  | -2.748183 | 0.881238  |
| H                                  | 5.250353  | -2.711387 | 1.601649  | H                                  | 5.067726  | -2.976701 | 1.568787  |
| H                                  | 5.528959  | -2.892811 | -0.146082 | H                                  | 5.329177  | -3.132958 | -0.184143 |
| H                                  | 5.976775  | 0.825851  | -0.755045 | H                                  | 5.847928  | 0.583291  | -0.735377 |
| H                                  | 6.21724   | -0.789859 | -1.486432 | H                                  | 6.048324  | -1.02543  | -1.493961 |
| H                                  | 8.21733   | 0.364621  | -0.717487 | H                                  | 8.0784    | 0.07784   | -0.726965 |
| H                                  | 4.267472  | 1.124761  | 1.337956  | H                                  | 4.162498  | 0.888836  | 1.379838  |
| H                                  | 6.792017  | 0.020514  | 1.781444  | H                                  | 6.673843  | -0.282278 | 1.77867   |
| Free Energy = -1473.195073 Hartree |           |           |           | Free Energy = -1473.194688 Hartree |           |           |           |

| conf. 2c-5 | X axis(Å) | Y axis(Å) | Z axis(Å) | conf. 2c-6 | X axis(Å) | Y axis(Å) | Z axis(Å) |
|------------|-----------|-----------|-----------|------------|-----------|-----------|-----------|
| C          | 0.116372  | -3.034761 | -1.017585 | C          | -5.328825 | 1.536332  | -0.790468 |
| C          | -1.208181 | -2.851758 | -0.570447 | C          | -0.223037 | -3.941672 | -1.597297 |
| C          | -1.690548 | -1.61178  | -0.146028 | C          | 2.179267  | -3.429067 | -1.389269 |
| C          | -0.767022 | -0.548587 | -0.189608 | C          | -1.93681  | -2.185826 | -1.269696 |
| C          | 0.583573  | -0.71327  | -0.596485 | C          | 1.948193  | 1.370805  | -0.149928 |
| C          | 1.019045  | -1.978792 | -1.03328  | C          | -2.959171 | 1.76203   | -1.02042  |
| N          | -0.937159 | 0.78427   | 0.117355  | N          | 6.856728  | -2.372408 | 1.144861  |
| C          | 0.23033   | 1.486456  | -0.100982 | C          | -6.893271 | -0.048042 | 0.169511  |
| C          | 1.217751  | 0.590607  | -0.519099 | C          | -6.312531 | -1.86749  | 1.696752  |
| C          | 2.614593  | 0.873025  | -0.843732 | C          | -2.385124 | -1.287908 | 0.982058  |
| C          | 3.698563  | 0.179659  | -0.425263 | C          | -1.09985  | 2.752943  | 1.947836  |

|   |           |           |           |   |           |           |           |
|---|-----------|-----------|-----------|---|-----------|-----------|-----------|
| C | 5.056757  | 0.597852  | -0.882291 | C | -2.675809 | 4.669687  | 0.120326  |
| N | 6.09639   | -0.148463 | -0.397517 | N | 5.22655   | -2.55149  | 1.82616   |
| C | 6.019794  | -1.453122 | 0.258739  | C | -3.022025 | 4.213925  | 1.874823  |
| C | 4.658724  | -1.679681 | 0.921097  | C | 0.065228  | 3.566688  | -2.172817 |
| N | 3.634726  | -0.87761  | 0.502823  | N | 5.523101  | -2.895546 | 0.106069  |
| C | 0.247797  | 2.97147   | 0.25977   | C | -0.743876 | 4.857738  | -1.265728 |
| C | -1.041209 | 3.600342  | -0.259548 | C | -1.657153 | 3.430433  | -1.790099 |
| C | -1.991657 | 4.213314  | 0.451982  | C | 0.909616  | 4.731574  | 0.603071  |
| C | 1.413589  | 3.735572  | -0.411048 | C | 1.829404  | 3.557312  | -0.347732 |
| C | 0.391719  | 3.102031  | 1.795237  | C | 1.378737  | 3.191394  | 1.33639   |
| C | 7.158059  | -1.612922 | 1.270562  | C | -6.014817 | -3.768827 | 0.131057  |
| C | -3.108006 | -1.478868 | 0.380007  | C | -5.586686 | -2.647173 | -1.188004 |
| C | -4.039294 | -0.540798 | -0.407323 | C | -7.224225 | -2.627696 | -0.501692 |
| C | -5.555554 | -0.828842 | -0.240355 | C | 3.646852  | -0.329404 | -1.687328 |
| C | -5.979217 | -2.114019 | -0.962058 | C | 3.924176  | -1.983342 | -1.155573 |
| C | -5.977491 | -0.838623 | 1.238055  | C | 3.740695  | 0.908424  | 0.454749  |
| O | -7.411837 | -0.75757  | 1.254967  | O | 6.001218  | 0.751474  | -0.834319 |
| H | -3.822352 | -0.625122 | -1.482284 | H | 0.080851  | -2.931597 | -1.335568 |
| O | -6.184635 | 0.301299  | -0.878739 | O | 6.231488  | -0.9246   | -1.418385 |
| O | 4.494015  | -2.567669 | 1.750561  | O | 8.237301  | 0.273151  | -0.738945 |
| O | 5.245082  | 1.57306   | -1.609548 | O | 4.270995  | 1.248139  | 1.199979  |
| H | 0.433226  | -4.02088  | -1.346594 | H | 1.453877  | -2.637046 | -1.214592 |
| H | -1.878045 | -3.709069 | -0.548458 | H | 1.916391  | -1.354765 | -0.90992  |
| H | 2.035974  | -2.126681 | -1.384422 | H | 0.922834  | -0.380494 | -0.699036 |
| H | -1.853506 | 1.20178   | 0.267456  | H | -0.469198 | -0.653039 | -0.786847 |
| H | 2.853726  | 1.713415  | -1.485912 | H | -0.884946 | -1.951562 | -1.140174 |
| H | 7.003619  | 0.141114  | -0.747777 | H | 1.060636  | 0.968131  | -0.438273 |
| H | 6.111839  | -2.253287 | -0.49573  | H | -0.174367 | 1.567556  | -0.341404 |
| H | 2.730424  | -1.089501 | 0.915746  | H | -1.161902 | 0.599645  | -0.546326 |
| H | -1.156324 | 3.541863  | -1.343583 | H | -2.597386 | 0.84339   | -0.571198 |
| H | -1.948266 | 4.309726  | 1.533591  | H | -3.582494 | 0.068559  | -0.059744 |
| H | -2.857788 | 4.652157  | -0.0373   | H | -5.00336  | 0.491801  | -0.225272 |
| H | 2.385467  | 3.390844  | -0.047585 | H | -5.936083 | -0.343113 | 0.331118  |
| H | 1.32421   | 4.801332  | -0.17437  | H | -5.723733 | -1.716106 | 0.784992  |
| H | 1.393946  | 3.630751  | -1.501498 | H | -4.2737   | -1.962871 | 1.194376  |
| H | 0.405653  | 4.15682   | 2.094287  | H | -3.344177 | -1.086108 | 0.713568  |
| H | 1.332092  | 2.644639  | 2.119747  | H | -0.305541 | 3.066979  | -0.084291 |
| H | -0.425941 | 2.601714  | 2.324773  | H | -1.319439 | 3.300476  | 1.029682  |
| H | 7.094133  | -2.593234 | 1.748062  | H | -2.382219 | 4.107852  | 1.002821  |
| H | 7.098016  | -0.839655 | 2.043593  | H | -0.690886 | 3.771844  | -1.407211 |
| H | 8.128027  | -1.52945  | 0.766086  | H | 1.040027  | 3.662867  | 0.406404  |
| H | -3.089966 | -1.125776 | 1.42117   | H | -6.162498 | -2.758357 | -0.262356 |
| H | -3.543011 | -2.48307  | 0.396763  | H | 3.404334  | -1.055314 | -0.897514 |

|                                   |           |           |           |                                   |           |           |           |
|-----------------------------------|-----------|-----------|-----------|-----------------------------------|-----------|-----------|-----------|
| O                                 | -3.766651 | 0.800671  | 0.020111  | O                                 | 6.783097  | 0.174493  | 1.772057  |
| H                                 | -7.06295  | -2.246181 | -0.884892 | H                                 | 3.980431  | -0.508035 | 0.420721  |
| H                                 | -5.713022 | -2.051908 | -2.022233 | H                                 | 5.496981  | -0.765989 | 0.629177  |
| H                                 | -5.502283 | -3.002404 | -0.532935 | H                                 | 5.789788  | -2.238224 | 0.94129   |
| H                                 | -5.538167 | 0.024982  | 1.750835  | H                                 | 6.334529  | -0.254962 | -0.554979 |
| H                                 | -5.643318 | -1.761806 | 1.72849   | H                                 | 7.699001  | -0.226018 | -0.107399 |
| H                                 | -7.714378 | -0.55293  | 2.151801  | H                                 | 3.463742  | -0.975531 | 1.271333  |
| H                                 | -4.463541 | 1.357469  | -0.373018 | H                                 | 5.818934  | 0.036839  | 1.783814  |
| H                                 | -7.093925 | 0.349612  | -0.533148 | H                                 | -3.971577 | -2.926052 | 1.892038  |
| Free Energy = -1473.19461 Hartree |           |           |           | Free Energy = -1473.19434 Hartree |           |           |           |

| conf. 2c-7 | X axis(Å) | Y axis(Å) | Z axis(Å) | conf. 2c-8 | X axis(Å) | Y axis(Å) | Z axis(Å) |
|------------|-----------|-----------|-----------|------------|-----------|-----------|-----------|
| C          | 0.080924  | -2.931522 | -1.335602 | C          | -0.151163 | -3.069712 | -0.842298 |
| C          | 1.453939  | -2.636919 | -1.214635 | C          | -1.47616  | -2.823176 | -0.428806 |
| C          | 1.916398  | -1.354618 | -0.90997  | C          | -1.910018 | -1.55512  | -0.036693 |
| C          | 0.922821  | -0.380377 | -0.699083 | C          | -0.938706 | -0.537187 | -0.077546 |
| C          | -0.469208 | -0.65298  | -0.786896 | C          | 0.415233  | -0.763811 | -0.443535 |
| C          | -0.884907 | -1.95152  | -1.140211 | C          | 0.799091  | -2.055798 | -0.853374 |
| N          | 1.060557  | 0.968263  | -0.438341 | N          | -1.068689 | 0.808522  | 0.197828  |
| C          | -0.174476 | 1.567621  | -0.341434 | C          | 0.127771  | 1.458376  | -0.00023  |
| C          | -1.161956 | 0.599661  | -0.546377 | C          | 1.094083  | 0.516746  | -0.368584 |
| C          | -2.597466 | 0.843355  | -0.571207 | C          | 2.489725  | 0.803558  | -0.667739 |
| C          | -3.582496 | 0.068447  | -0.059715 | C          | 3.579806  | 0.068159  | -0.345124 |
| C          | -5.003395 | 0.491618  | -0.225134 | C          | 4.928448  | 0.531722  | -0.781392 |
| N          | -5.936001 | -0.343203 | 0.331631  | N          | 5.972503  | -0.275777 | -0.411174 |
| C          | -5.723544 | -1.716363 | 0.784965  | C          | 5.878089  | -1.668868 | 0.024946  |
| C          | -4.273532 | -1.963021 | 1.194457  | C          | 4.559561  | -1.935516 | 0.75595   |
| N          | -3.34408  | -1.086172 | 0.713645  | N          | 3.534809  | -1.076731 | 0.476077  |
| C          | -0.305723 | 3.067044  | -0.084327 | C          | 0.246181  | 2.970253  | 0.184067  |
| C          | -1.319695 | 3.300477  | 1.02959   | C          | 1.421662  | 3.26778   | 1.109042  |
| C          | -2.382498 | 4.10782   | 1.002709  | C          | 2.451427  | 4.084569  | 0.875418  |
| C          | -0.691016 | 3.771928  | -1.407254 | C          | -1.018628 | 3.542643  | 0.876668  |
| C          | 1.03979   | 3.663006  | 0.406445  | C          | 0.382622  | 3.647234  | -1.199924 |
| C          | -6.162026 | -2.758305 | -0.262818 | C          | 7.080317  | -2.040964 | 0.894592  |
| C          | 3.404326  | -1.055101 | -0.897549 | C          | -3.332537 | -1.341794 | 0.447844  |
| C          | 3.980456  | -0.508196 | 0.420833  | C          | -4.193039 | -0.362747 | -0.371607 |
| C          | 5.497039  | -0.766043 | 0.629094  | C          | -5.724723 | -0.591326 | -0.263534 |
| C          | 5.790044  | -2.238365 | 0.940628  | C          | -6.171331 | -1.847234 | -1.021551 |
| C          | 6.334476  | -0.254458 | -0.554897 | C          | -6.200367 | -0.60722  | 1.198846  |
| O          | 7.699004  | -0.225666 | -0.107419 | O          | -7.629345 | -0.467516 | 1.164455  |
| H          | 3.463873  | -0.976029 | 1.271323  | H          | -3.937272 | -0.45068  | -1.43742  |
| O          | 5.81895   | 0.036397  | 1.78402   | O          | -6.285698 | 0.573367  | -0.903887 |

|                                    |           |           |           |                                    |           |           |           |
|------------------------------------|-----------|-----------|-----------|------------------------------------|-----------|-----------|-----------|
| O                                  | -3.971333 | -2.926179 | 1.892111  | O                                  | 4.422097  | -2.893862 | 1.509149  |
| O                                  | -5.328983 | 1.536066  | -0.790398 | O                                  | 5.111244  | 1.583444  | -1.394707 |
| H                                  | -0.222921 | -3.941615 | -1.59731  | H                                  | 0.129278  | -4.073136 | -1.151401 |
| H                                  | 2.179362  | -3.428906 | -1.389321 | H                                  | -2.184498 | -3.64903  | -0.411101 |
| H                                  | -1.936762 | -2.185814 | -1.26975  | H                                  | 1.812816  | -2.258525 | -1.184261 |
| H                                  | 1.948058  | 1.370945  | -0.14986  | H                                  | -1.975659 | 1.244836  | 0.33798   |
| H                                  | -2.959332 | 1.761967  | -1.020411 | H                                  | 2.729818  | 1.724795  | -1.187476 |
| H                                  | -6.893218 | -0.048249 | 0.169988  | H                                  | 6.871757  | 0.037849  | -0.761318 |
| H                                  | -6.312441 | -1.868146 | 1.696587  | H                                  | 5.865518  | -2.335799 | -0.855324 |
| H                                  | -2.38501  | -1.287911 | 0.982118  | H                                  | 2.655649  | -1.295739 | 0.935947  |
| H                                  | -1.100134 | 2.752907  | 1.94773   | H                                  | 1.363751  | 2.75891   | 2.072746  |
| H                                  | -2.676061 | 4.669689  | 0.120225  | H                                  | 2.588438  | 4.609657  | -0.065888 |
| H                                  | -3.022358 | 4.213824  | 1.87468   | H                                  | 3.221817  | 4.236955  | 1.626685  |
| H                                  | 0.06513   | 3.566764  | -2.172823 | H                                  | -1.917056 | 3.401443  | 0.263247  |
| H                                  | -0.743994 | 4.857816  | -1.265736 | H                                  | -0.888975 | 4.618777  | 1.028711  |
| H                                  | -1.657272 | 3.430539  | -1.79018  | H                                  | -1.190151 | 3.083236  | 1.856816  |
| H                                  | 0.909301  | 4.731708  | 0.603091  | H                                  | 0.428364  | 4.737065  | -1.091213 |
| H                                  | 1.829207  | 3.557475  | -0.347646 | H                                  | -0.485933 | 3.404992  | -1.82204  |
| H                                  | 1.378454  | 3.191568  | 1.336465  | H                                  | 1.278978  | 3.320648  | -1.734458 |
| H                                  | -6.01424  | -3.7689   | 0.130243  | H                                  | 6.998135  | -3.081759 | 1.215443  |
| H                                  | -5.586127 | -2.646699 | -1.18836  | H                                  | 7.125914  | -1.402826 | 1.78325   |
| H                                  | -7.223745 | -2.627715 | -0.502222 | H                                  | 8.010726  | -1.919805 | 0.327028  |
| H                                  | 3.646777  | -0.328934 | -1.687144 | H                                  | -3.326032 | -0.982079 | 1.48694   |
| H                                  | 3.924219  | -1.98302  | -1.155911 | H                                  | -3.820687 | -2.321381 | 0.459395  |
| O                                  | 3.740537  | 0.908229  | 0.45534   | O                                  | -3.889987 | 0.971033  | 0.069172  |
| H                                  | 6.857009  | -2.372498 | 1.144094  | H                                  | -7.26053  | -1.944059 | -0.976216 |
| H                                  | 5.226852  | -2.552054 | 1.825372  | H                                  | -5.873843 | -1.774268 | -2.07256  |
| H                                  | 5.523423  | -2.895371 | 0.105135  | H                                  | -5.735908 | -2.759005 | -0.597438 |
| H                                  | 6.001106  | 0.752087  | -0.833752 | H                                  | -5.746202 | 0.229245  | 1.743049  |
| H                                  | 6.231428  | -0.923715 | -1.418596 | H                                  | -5.92102  | -1.550884 | 1.684355  |
| H                                  | 8.2371    | 0.274336  | -0.738479 | H                                  | -7.958183 | -0.272429 | 2.054174  |
| H                                  | 4.270822  | 1.247768  | 1.200659  | H                                  | -4.57661  | 1.541018  | -0.325612 |
| H                                  | 6.783112  | 0.174046  | 1.772333  | H                                  | -7.203315 | 0.654752  | -0.587331 |
| Free Energy = -1473.194339 Hartree |           |           |           | Free Energy = -1473.194257 Hartree |           |           |           |

**Table S19.** The Cartesian coordinates of the lowest energy conformers (Conf. 1-7) for isomer **2d**.

| conf. 2d-1 | X axis(Å) | Y axis(Å) | Z axis(Å) | conf. 2d-2 | X axis(Å) | Y axis(Å) | Z axis(Å) |
|------------|-----------|-----------|-----------|------------|-----------|-----------|-----------|
| C          | -0.130149 | -2.819912 | -1.887208 | C          | 0.01136   | -3.19906  | -0.600648 |
| C          | -1.517818 | -2.615139 | -1.740188 | C          | 1.347304  | -3.061197 | -0.169358 |
| C          | -2.03825  | -1.414255 | -1.254359 | C          | 1.877686  | -1.825024 | 0.204626  |
| C          | -1.099677 | -0.426848 | -0.896654 | C          | 1.001823  | -0.724323 | 0.137429  |

|   |           |           |           |   |           |           |           |
|---|-----------|-----------|-----------|---|-----------|-----------|-----------|
| C | 0.302133  | -0.615185 | -1.013348 | C | -0.359395 | -0.843687 | -0.245824 |
| C | 0.782209  | -1.830836 | -1.540949 | C | -0.844491 | -2.105399 | -0.64527  |
| N | -1.304637 | 0.86716   | -0.445433 | N | 1.238214  | 0.615065  | 0.39994   |
| C | -0.093376 | 1.509343  | -0.273165 | C | 0.08749   | 1.352047  | 0.194088  |
| C | 0.935058  | 0.622813  | -0.602202 | C | -0.937571 | 0.484005  | -0.189426 |
| C | 2.358734  | 0.930899  | -0.575993 | C | -2.305999 | 0.873496  | -0.506344 |
| C | 3.368081  | 0.139965  | -0.141899 | C | -3.448155 | 0.23979   | -0.151245 |
| C | 4.77287   | 0.640675  | -0.205238 | C | -4.761286 | 0.796739  | -0.594152 |
| N | 5.726612  | -0.236752 | 0.239221  | N | -5.86586  | 0.095324  | -0.192437 |
| C | 5.562113  | -1.677696 | 0.430293  | C | -5.899337 | -1.253678 | 0.369017  |
| C | 4.123379  | -2.027232 | 0.819224  | C | -4.579434 | -1.627138 | 1.039121  |
| N | 3.168629  | -1.11274  | 0.472486  | N | -3.48534  | -0.881958 | 0.700784  |
| C | -0.006845 | 2.960114  | 0.200743  | C | 0.044643  | 2.864037  | 0.414555  |
| C | 0.622432  | 3.778536  | -0.924352 | C | -0.270153 | 3.523999  | -0.925621 |
| C | 1.724175  | 4.531144  | -0.862879 | C | -1.291289 | 4.335795  | -1.212822 |
| C | 0.79568   | 3.034799  | 1.519002  | C | 1.418324  | 3.407576  | 0.876759  |
| C | -1.411723 | 3.556958  | 0.458539  | C | -0.994124 | 3.199536  | 1.508266  |
| C | 6.55939   | -2.198183 | 1.467218  | C | -6.282225 | -2.318088 | -0.677688 |
| C | -3.523604 | -1.171564 | -1.120991 | C | 3.316604  | -1.660627 | 0.635806  |
| C | -3.986208 | -1.204612 | 0.34864   | C | 4.180878  | -1.027146 | -0.471843 |
| C | -5.366835 | -0.57382  | 0.631926  | C | 5.54339   | -0.459724 | -0.018633 |
| O | -5.56786  | -0.612995 | 2.05851   | O | 6.150203  | 0.159704  | -1.169944 |
| C | -5.375246 | 0.92308   | 0.291512  | C | 5.361796  | 0.694308  | 0.977416  |
| O | -4.244622 | 1.620296  | 0.822411  | O | 4.389039  | 1.651392  | 0.54943   |
| H | -3.26358  | -0.651747 | 0.959619  | H | 3.630475  | -0.189916 | -0.915749 |
| C | -6.518949 | -1.287229 | -0.084503 | C | 6.480435  | -1.522781 | 0.565131  |
| O | 3.841677  | -3.088064 | 1.366057  | O | -4.514036 | -2.573935 | 1.815977  |
| O | 5.062721  | 1.775345  | -0.583472 | O | -4.858365 | 1.837467  | -1.244393 |
| H | 0.227124  | -3.763663 | -2.290385 | H | -0.352915 | -4.179766 | -0.894597 |
| H | -2.206944 | -3.401514 | -2.040727 | H | 1.983404  | -3.942228 | -0.115721 |
| H | 1.845528  | -1.991224 | -1.688761 | H | -1.867147 | -2.223097 | -0.989722 |
| H | -2.20186  | 1.250287  | -0.162172 | H | 2.144334  | 1.015654  | 0.622268  |
| H | 2.673299  | 1.916382  | -0.906971 | H | -2.459346 | 1.790313  | -1.068151 |
| H | 6.675071  | 0.112217  | 0.148241  | H | -6.739767 | 0.481219  | -0.53421  |
| H | 5.744779  | -2.204059 | -0.523098 | H | -6.645963 | -1.269426 | 1.171279  |
| H | 2.215911  | -1.385571 | 0.696017  | H | -2.617621 | -1.171103 | 1.143666  |
| H | 0.071245  | 3.730239  | -1.865195 | H | 0.452961  | 3.293972  | -1.710484 |
| H | 2.332789  | 4.615019  | 0.03323   | H | -2.058616 | 4.598184  | -0.489893 |
| H | 2.067978  | 5.08619   | -1.73182  | H | -1.402252 | 4.759791  | -2.207441 |
| H | 0.302476  | 2.433823  | 2.291207  | H | 1.736636  | 2.954524  | 1.822956  |
| H | 0.846232  | 4.069704  | 1.876607  | H | 1.34105   | 4.488332  | 1.031591  |
| H | 1.816216  | 2.660335  | 1.402873  | H | 2.205341  | 3.238003  | 0.134527  |
| H | -1.303513 | 4.59799   | 0.778832  | H | -1.022578 | 4.280536  | 1.687598  |

|                                    |           |           |           |                                    |           |           |           |
|------------------------------------|-----------|-----------|-----------|------------------------------------|-----------|-----------|-----------|
| H                                  | -1.945108 | 3.01714   | 1.248713  | H                                  | -0.718717 | 2.707266  | 2.44757   |
| H                                  | -2.037902 | 3.553291  | -0.440641 | H                                  | -1.999944 | 2.867967  | 1.237596  |
| H                                  | 6.426824  | -3.273918 | 1.602028  | H                                  | -6.326207 | -3.305128 | -0.207359 |
| H                                  | 6.407289  | -1.702611 | 2.431708  | H                                  | -5.552254 | -2.343119 | -1.494501 |
| H                                  | 7.586547  | -2.009398 | 1.133141  | H                                  | -7.265797 | -2.089733 | -1.10417  |
| H                                  | -4.080084 | -1.928012 | -1.684843 | H                                  | 3.741635  | -2.634228 | 0.902987  |
| H                                  | -3.771122 | -0.196867 | -1.561276 | H                                  | 3.355917  | -1.035049 | 1.53693   |
| O                                  | -4.060173 | -2.550911 | 0.846039  | O                                  | 4.47524   | -1.974331 | -1.511912 |
| H                                  | -7.472292 | -0.83363  | 0.206697  | H                                  | 7.445998  | -1.068866 | 0.812482  |
| H                                  | -6.541113 | -2.345912 | 0.190026  | H                                  | 6.65037   | -2.321804 | -0.162536 |
| H                                  | -6.420886 | -1.219668 | -1.174629 | H                                  | 6.064631  | -1.972553 | 1.474681  |
| H                                  | -6.306342 | 1.356641  | 0.679814  | H                                  | 6.336904  | 1.17909   | 1.118645  |
| H                                  | -5.349862 | 1.084099  | -0.78848  | H                                  | 5.020526  | 0.329885  | 1.948931  |
| H                                  | -4.268087 | 1.494752  | 1.786757  | H                                  | 4.697284  | 1.998342  | -0.305434 |
| H                                  | -3.167432 | -2.933028 | 0.838108  | H                                  | 3.640429  | -2.239087 | -1.931715 |
| H                                  | -5.316791 | -1.505236 | 2.35608   | H                                  | 6.045847  | -0.460101 | -1.913321 |
| Free Energy = -1473.195783 Hartree |           |           |           | Free Energy = -1473.195485 Hartree |           |           |           |

| conf. 2d-3 | X axis(Å) | Y axis(Å) | Z axis(Å) | conf. 2d-4 | X axis(Å) | Y axis(Å) | Z axis(Å) |
|------------|-----------|-----------|-----------|------------|-----------|-----------|-----------|
| C          | -0.14809  | -2.94745  | -1.738859 | C          | -0.148201 | -2.947274 | -1.739582 |
| C          | -1.534774 | -2.738156 | -1.588215 | C          | -1.53486  | -2.738003 | -1.58872  |
| C          | -2.054388 | -1.510733 | -1.173165 | C          | -2.054459 | -1.510654 | -1.173412 |
| C          | -1.115529 | -0.4993   | -0.889936 | C          | -1.115603 | -0.499211 | -0.890224 |
| C          | 0.285153  | -0.690542 | -1.012243 | C          | 0.285073  | -0.690457 | -1.01279  |
| C          | 0.764253  | -1.935211 | -1.467234 | C          | 0.764161  | -1.93506  | -1.467933 |
| N          | -1.319156 | 0.818033  | -0.512692 | N          | -1.319157 | 0.818035  | -0.51267  |
| C          | -0.106687 | 1.471287  | -0.39057  | C          | -0.106621 | 1.471223  | -0.390656 |
| C          | 0.918582  | 0.572285  | -0.684838 | C          | 0.918563  | 0.57226   | -0.685246 |
| C          | 2.343895  | 0.881017  | -0.73252  | C          | 2.343927  | 0.880917  | -0.733074 |
| C          | 3.362801  | 0.124549  | -0.263812 | C          | 3.362706  | 0.124479  | -0.26409  |
| C          | 4.767705  | 0.597486  | -0.435349 | C          | 4.767696  | 0.597103  | -0.435685 |
| N          | 5.731285  | -0.226164 | 0.083978  | N          | 5.73108   | -0.226217 | 0.084591  |
| C          | 5.571193  | -1.625846 | 0.477413  | C          | 5.570884  | -1.625791 | 0.478327  |
| C          | 4.1351    | -1.929058 | 0.910987  | C          | 4.134588  | -1.929143 | 0.911005  |
| N          | 3.174715  | -1.059677 | 0.476148  | N          | 3.174403  | -1.059577 | 0.476124  |
| C          | -0.031947 | 2.956755  | -0.045575 | C          | -0.031759 | 2.956618  | -0.045463 |
| C          | 1.111743  | 3.196681  | 0.933171  | C          | 1.11222   | 3.196385  | 0.932977  |
| C          | 2.077604  | 4.113615  | 0.840587  | C          | 2.07809   | 4.113292  | 0.840237  |
| C          | -1.324223 | 3.432299  | 0.669227  | C          | -1.323824 | 3.432083  | 0.669777  |
| C          | 0.124961  | 3.761341  | -1.358587 | C          | 0.124807  | 3.761393  | -1.358396 |
| C          | 6.569635  | -1.991393 | 1.578478  | C          | 6.568602  | -1.990867 | 1.580268  |
| C          | -3.539343 | -1.260002 | -1.047544 | C          | -3.539429 | -1.260077 | -1.047571 |



|                                    |           |           |           |                                    |           |           |           |
|------------------------------------|-----------|-----------|-----------|------------------------------------|-----------|-----------|-----------|
| C                                  | -3.989374 | -1.154966 | 0.422371  | C                                  | -3.989231 | -1.154883 | 0.422402  |
| C                                  | -5.368322 | -0.502163 | 0.657466  | C                                  | -5.36805  | -0.501907 | 0.657707  |
| O                                  | -5.550824 | -0.394837 | 2.083205  | O                                  | -5.550241 | -0.394486 | 2.08349   |
| C                                  | -5.3887   | 0.950963  | 0.163091  | C                                  | -5.38834  | 0.951224  | 0.163338  |
| O                                  | -4.243932 | 1.700959  | 0.58131   | O                                  | -4.243434 | 1.701092  | 0.581501  |
| H                                  | -3.263611 | -0.545877 | 0.972917  | H                                  | -3.263313 | -0.545886 | 0.972832  |
| C                                  | -6.527086 | -1.288741 | 0.034239  | C                                  | -6.527012 | -1.288393 | 0.034741  |
| O                                  | 3.860488  | -2.924402 | 1.572734  | O                                  | 3.859673  | -2.924828 | 1.572129  |
| O                                  | 5.051679  | 1.670301  | -0.967008 | O                                  | 5.051891  | 1.6695    | -0.968048 |
| H                                  | 0.207964  | -3.913787 | -2.085711 | H                                  | 0.207816  | -3.913568 | -2.086587 |
| H                                  | -2.224182 | -3.544387 | -1.829795 | H                                  | -2.224302 | -3.5442   | -1.830309 |
| H                                  | 1.826659  | -2.100443 | -1.6167   | H                                  | 1.826566  | -2.100245 | -1.617477 |
| H                                  | -2.217101 | 1.216268  | -0.252114 | H                                  | -2.217081 | 1.216249  | -0.25195  |
| H                                  | 2.659037  | 1.824399  | -1.165499 | H                                  | 2.659153  | 1.824094  | -1.166457 |
| H                                  | 6.677448  | 0.101673  | -0.080186 | H                                  | 6.677276  | 0.101253  | -0.080149 |
| H                                  | 5.758074  | -2.280421 | -0.391751 | H                                  | 5.758564  | -2.280646 | -0.390453 |
| H                                  | 2.225654  | -1.306475 | 0.742146  | H                                  | 2.225224  | -1.30649  | 0.741595  |
| H                                  | 1.077835  | 2.560179  | 1.818842  | H                                  | 1.078566  | 2.559746  | 1.818561  |
| H                                  | 2.187994  | 4.77332   | -0.015677 | H                                  | 2.18824   | 4.773147  | -0.015947 |
| H                                  | 2.821878  | 4.217586  | 1.625467  | H                                  | 2.822604  | 4.21712   | 1.624911  |
| H                                  | -2.213191 | 3.333237  | 0.037074  | H                                  | -2.212958 | 3.333117  | 0.037857  |
| H                                  | -1.21899  | 4.490067  | 0.929844  | H                                  | -1.218479 | 4.489807  | 0.930528  |
| H                                  | -1.497057 | 2.875994  | 1.598282  | H                                  | -1.496388 | 2.875627  | 1.598789  |
| H                                  | 0.127042  | 4.838383  | -1.154849 | H                                  | 0.127047  | 4.838397  | -1.154465 |
| H                                  | -0.71213  | 3.547347  | -2.031878 | H                                  | -0.712514 | 3.547574  | -2.031456 |
| H                                  | 1.052387  | 3.50906   | -1.882242 | H                                  | 1.052045  | 3.509119  | -1.882387 |
| H                                  | 6.444079  | -3.039241 | 1.860099  | H                                  | 6.443177  | -3.038716 | 1.861945  |
| H                                  | 6.412032  | -1.367893 | 2.46474   | H                                  | 6.410146  | -1.367236 | 2.466279  |
| H                                  | 7.596349  | -1.843105 | 1.223341  | H                                  | 7.595525  | -1.842283 | 1.225859  |
| H                                  | -4.099248 | -2.066668 | -1.532999 | H                                  | -4.099346 | -2.066887 | -1.532782 |
| H                                  | -3.790724 | -0.331169 | -1.576081 | H                                  | -3.79103  | -0.331371 | -1.576235 |
| O                                  | -4.054706 | -2.448109 | 1.045558  | O                                  | -4.054604 | -2.447997 | 1.0457    |
| H                                  | -7.477762 | -0.80351  | 0.279966  | H                                  | -7.477595 | -0.80297  | 0.280422  |
| H                                  | -6.548639 | -2.309802 | 0.426185  | H                                  | -6.548711 | -2.309386 | 0.426859  |
| H                                  | -6.437143 | -1.344505 | -1.057207 | H                                  | -6.437135 | -1.344368 | -1.056702 |
| H                                  | -6.308187 | 1.424005  | 0.531892  | H                                  | -6.307738 | 1.424369  | 0.532219  |
| H                                  | -5.396637 | 0.997909  | -0.928094 | H                                  | -5.396365 | 0.998192  | -0.927844 |
| H                                  | -4.247715 | 1.704132  | 1.553783  | H                                  | -4.246982 | 1.703908  | 1.553984  |
| H                                  | -3.161636 | -2.829278 | 1.059047  | H                                  | -3.161576 | -2.829277 | 1.058965  |
| H                                  | -5.295011 | -1.251959 | 2.46724   | H                                  | -5.294568 | -1.251664 | 2.467491  |
| Free Energy = -1473.194405 Hartree |           |           |           | Free Energy = -1473.194399 Hartree |           |           |           |

| conf. 2d-5 | X axis(Å) | Y axis(Å) | Z axis(Å) | conf. 2d-6 | X axis(Å) | Y axis(Å) | Z axis(Å) |
|------------|-----------|-----------|-----------|------------|-----------|-----------|-----------|
| C          | 0.024352  | -3.246447 | -0.47073  | C          | 0.024444  | -3.246393 | -0.470608 |
| C          | 1.359993  | -3.091704 | -0.043547 | C          | 1.360051  | -3.091605 | -0.043314 |
| C          | 1.892836  | -1.839802 | 0.268805  | C          | 1.892826  | -1.839678 | 0.269043  |
| C          | 1.020202  | -0.741714 | 0.144038  | C          | 1.020167  | -0.741621 | 0.144125  |
| C          | -0.339333 | -0.874618 | -0.23895  | C          | -0.339304 | -0.874553 | -0.239038 |
| C          | -0.827764 | -2.153401 | -0.57412  | C          | -0.827682 | -2.153369 | -0.574165 |
| N          | 1.259588  | 0.606302  | 0.346294  | N          | 1.25947   | 0.606397  | 0.346571  |
| C          | 0.112103  | 1.33732   | 0.102223  | C          | 0.11204   | 1.337414  | 0.102179  |
| C          | -0.912083 | 0.457849  | -0.250113 | C          | -0.912105 | 0.457926  | -0.250213 |
| C          | -2.272686 | 0.826043  | -0.631083 | C          | -2.272746 | 0.826003  | -0.631169 |
| C          | -3.421154 | 0.216391  | -0.258121 | C          | -3.421166 | 0.216321  | -0.25811  |
| C          | -4.722023 | 0.71822   | -0.79192  | C          | -4.722116 | 0.718091  | -0.791803 |
| N          | -5.83772  | 0.064806  | -0.343321 | N          | -5.837729 | 0.064635  | -0.343064 |
| C          | -5.896542 | -1.200454 | 0.385871  | C          | -5.896241 | -1.200925 | 0.385604  |
| C          | -4.579923 | -1.525245 | 1.08706   | C          | -4.579747 | -1.525308 | 1.087197  |
| N          | -3.476018 | -0.82753  | 0.686375  | N          | -3.47591  | -0.827483 | 0.686535  |
| C          | 0.112511  | 2.860622  | 0.204644  | C          | 0.112334  | 2.860733  | 0.204644  |
| C          | -1.207318 | 3.333488  | 0.802699  | C          | -1.207511 | 3.333438  | 0.802821  |
| C          | -2.006802 | 4.296153  | 0.337592  | C          | -2.007156 | 4.295997  | 0.33777   |
| C          | 0.375894  | 3.455033  | -1.19969  | C          | 0.375584  | 3.455224  | -1.199685 |
| C          | 1.22609   | 3.350329  | 1.170841  | C          | 1.225937  | 3.350495  | 1.170754  |
| C          | -6.319313 | -2.375944 | -0.516204 | C          | -6.317961 | -2.376389 | -0.517053 |
| C          | 3.330613  | -1.650765 | 0.693652  | C          | 3.330562  | -1.650486 | 0.69395   |
| C          | 4.18909   | -1.050735 | -0.437629 | C          | 4.189107  | -1.050914 | -0.437545 |
| C          | 5.528089  | -0.416041 | -0.003863 | C          | 5.528005  | -0.415909 | -0.003955 |
| O          | 6.132283  | 0.149244  | -1.183968 | O          | 6.132242  | 0.148917  | -1.184246 |
| C          | 5.300557  | 0.792494  | 0.915341  | C          | 5.300264  | 0.792975  | 0.914757  |
| O          | 4.316088  | 1.698979  | 0.407925  | O          | 4.315637  | 1.699097  | 0.407025  |
| H          | 3.618611  | -0.256762 | -0.932447 | H          | 3.618596  | -0.257201 | -0.932746 |
| C          | 6.487184  | -1.412485 | 0.65647   | C          | 6.487146  | -1.411982 | 0.656877  |
| O          | -4.527377 | -2.396607 | 1.948768  | O          | -4.527207 | -2.396552 | 1.949028  |
| O          | -4.800783 | 1.675725  | -1.561302 | O          | -4.801    | 1.675676  | -1.561082 |
| H          | -0.342749 | -4.239591 | -0.715271 | H          | -0.342621 | -4.239565 | -0.715089 |
| H          | 1.993172  | -3.970999 | 0.055408  | H          | 1.993229  | -3.970891 | 0.05575   |
| H          | -1.849898 | -2.285474 | -0.91506  | H          | -1.849798 | -2.285482 | -0.915148 |
| H          | 2.166915  | 1.014671  | 0.549383  | H          | 2.166962  | 1.014862  | 0.548754  |
| H          | -2.420266 | 1.689203  | -1.271347 | H          | -2.420422 | 1.689145  | -1.271437 |
| H          | -6.701634 | 0.410923  | -0.747376 | H          | -6.701725 | 0.410781  | -0.746922 |
| H          | -6.634048 | -1.097085 | 1.190774  | H          | -6.634145 | -1.09817  | 1.190194  |
| H          | -2.614924 | -1.081812 | 1.162559  | H          | -2.614785 | -1.081638 | 1.162732  |
| H          | -1.469936 | 2.842001  | 1.740565  | H          | -1.469999 | 2.841908  | 1.740699  |
| H          | -1.82014  | 4.82169   | -0.595027 | H          | -1.820631 | 4.821556  | -0.594862 |

|                                    |           |           |           |                                    |           |           |           |
|------------------------------------|-----------|-----------|-----------|------------------------------------|-----------|-----------|-----------|
| H                                  | -2.908367 | 4.577567  | 0.874901  | H                                  | -2.908744 | 4.577272  | 0.875113  |
| H                                  | 1.32742   | 3.083292  | -1.595817 | H                                  | 1.327165  | 3.083645  | -1.595837 |
| H                                  | 0.436492  | 4.548385  | -1.152893 | H                                  | 0.436025  | 4.548587  | -1.152884 |
| H                                  | -0.413398 | 3.183095  | -1.907868 | H                                  | -0.413667 | 3.183186  | -1.907867 |
| H                                  | 1.169427  | 4.440169  | 1.256405  | H                                  | 1.169188  | 4.440327  | 1.256386  |
| H                                  | 2.231316  | 3.097707  | 0.816301  | H                                  | 2.231157  | 3.097992  | 0.816099  |
| H                                  | 1.098707  | 2.927756  | 2.174285  | H                                  | 1.098718  | 2.927852  | 2.174189  |
| H                                  | -6.384235 | -3.294549 | 0.07457   | H                                  | -6.382748 | -3.295197 | 0.073418  |
| H                                  | -5.598799 | -2.522878 | -1.328527 | H                                  | -5.596926 | -2.522732 | -1.329027 |
| H                                  | -7.301053 | -2.175378 | -0.960635 | H                                  | -7.299552 | -2.176177 | -0.961974 |
| H                                  | 3.764114  | -2.610378 | 0.995634  | H                                  | 3.764046  | -2.609967 | 0.996359  |
| H                                  | 3.36436   | -0.993519 | 1.572387  | H                                  | 3.364212  | -0.992849 | 1.572389  |
| O                                  | 4.52435   | -2.042899 | -1.42209  | O                                  | 4.52456   | -2.043512 | -1.421489 |
| H                                  | 7.435131  | -0.915385 | 0.888322  | H                                  | 7.435048  | -0.914689 | 0.888525  |
| H                                  | 6.691544  | -2.248696 | -0.018646 | H                                  | 6.691634  | -2.248476 | -0.017855 |
| H                                  | 6.071036  | -1.818591 | 1.586172  | H                                  | 6.071034  | -1.817723 | 1.586752  |
| H                                  | 6.26077   | 1.309046  | 1.044142  | H                                  | 6.260405  | 1.309716  | 1.043337  |
| H                                  | 4.946438  | 0.48212   | 1.900897  | H                                  | 4.946214  | 0.482923  | 1.900437  |
| H                                  | 4.623751  | 1.981528  | -0.470823 | H                                  | 4.623327  | 1.981606  | -0.471718 |
| H                                  | 3.703619  | -2.349562 | -1.841008 | H                                  | 3.703948  | -2.350158 | -1.840644 |
| H                                  | 6.051762  | -0.516597 | -1.889654 | H                                  | 6.051791  | -0.5172   | -1.889682 |
| Free Energy = -1473.193969 Hartree |           |           |           | Free Energy = -1473.193966 Hartree |           |           |           |

| conf. 2d-6 | X axis(Å) | Y axis(Å) | Z axis(Å) |
|------------|-----------|-----------|-----------|
| C          | 0.209817  | -2.787932 | -1.526618 |
| C          | 1.569325  | -2.42708  | -1.432242 |
| C          | 1.975117  | -1.134447 | -1.092637 |
| C          | 0.93981   | -0.220578 | -0.821072 |
| C          | -0.438458 | -0.561607 | -0.88002  |
| C          | -0.798341 | -1.867041 | -1.267826 |
| N          | 1.016936  | 1.122933  | -0.514228 |
| C          | -0.243142 | 1.654143  | -0.361321 |
| C          | -1.185999 | 0.644008  | -0.574013 |
| C          | -2.632442 | 0.811725  | -0.546679 |
| C          | -3.556912 | -0.029045 | -0.026481 |
| C          | -5.003004 | 0.321029  | -0.132016 |
| N          | -5.870119 | -0.575754 | 0.434076  |
| C          | -5.570716 | -1.943597 | 0.852598  |
| C          | -4.094534 | -2.12474  | 1.19751   |
| N          | -3.230637 | -1.190343 | 0.703643  |
| C          | -0.443536 | 3.132455  | -0.035668 |
| C          | -1.42502  | 3.261059  | 1.123831  |

|   |           |           |           |
|---|-----------|-----------|-----------|
| C | -2.530114 | 4.008459  | 1.17268   |
| C | -0.91673  | 3.872612  | -1.309391 |
| C | 0.88615   | 3.780119  | 0.432375  |
| C | -6.000728 | -2.988402 | -0.195817 |
| C | 3.44548   | -0.759374 | -1.098736 |
| C | 4.015184  | -0.228084 | 0.22803   |
| C | 5.542563  | -0.424218 | 0.409742  |
| O | 5.826429  | 0.324069  | 1.609039  |
| C | 5.877123  | -1.898569 | 0.688701  |
| O | 7.233327  | -1.927974 | 1.153594  |
| H | 3.521713  | -0.733337 | 1.0711    |
| C | 6.368795  | 0.134444  | -0.755749 |
| O | -3.716031 | -3.087748 | 1.857447  |
| O | -5.403228 | 1.359774  | -0.658421 |
| H | -0.049863 | -3.802335 | -1.817715 |
| H | 2.328528  | -3.173631 | -1.657033 |
| H | -1.840646 | -2.150613 | -1.374641 |
| H | 1.892759  | 1.561754  | -0.242527 |
| H | -3.057133 | 1.721209  | -0.957826 |
| H | -6.84658  | -0.327933 | 0.313733  |
| H | -6.112815 | -2.140595 | 1.784521  |
| H | -2.252662 | -1.349058 | 0.929399  |
| H | -1.140959 | 2.687621  | 2.007882  |
| H | -2.888495 | 4.591288  | 0.32863   |
| H | -3.139411 | 4.041403  | 2.072001  |
| H | -0.180606 | 3.74544   | -2.110527 |
| H | -1.02277  | 4.94599   | -1.113525 |
| H | -1.877488 | 3.49662   | -1.673143 |
| H | 0.706383  | 4.831019  | 0.679509  |
| H | 1.651488  | 3.749469  | -0.352632 |
| H | 1.284481  | 3.290609  | 1.328885  |
| H | -5.789438 | -3.996802 | 0.173038  |
| H | -5.468206 | -2.834378 | -1.141029 |
| H | -7.076189 | -2.905284 | -0.391    |
| H | 3.641559  | 0.002651  | -1.866036 |
| H | 4.008725  | -1.649848 | -1.398899 |
| O | 3.722501  | 1.176905  | 0.302786  |
| H | 7.436444  | 0.061356  | -0.526576 |
| H | 6.115668  | 1.184844  | -0.924175 |
| H | 6.185242  | -0.422163 | -1.681858 |
| H | 5.773699  | -2.504417 | -0.22077  |
| H | 5.200437  | -2.288794 | 1.460762  |
| H | 7.43133   | -2.801196 | 1.522699  |

|                                   |          |          |          |
|-----------------------------------|----------|----------|----------|
| H                                 | 4.210801 | 1.522311 | 1.071939 |
| H                                 | 6.698637 | 0.03671  | 1.93074  |
| Free Energy = -1473.19335 Hartree |          |          |          |

**Table S20.** The Cartesian coordinates of the lowest energy conformers (Conf. 1-6) for isomer 3a.

| conf. 3a-1 | X axis(Å) | Y axis(Å) | Z axis(Å) | conf. 3a-2 | X axis(Å) | Y axis(Å) | Z axis(Å) |
|------------|-----------|-----------|-----------|------------|-----------|-----------|-----------|
| C          | -0.024623 | -2.769149 | -1.758993 | C          | -0.024227 | -2.768883 | -1.759728 |
| C          | 1.359429  | -2.524891 | -1.6641   | C          | 1.359797  | -2.524526 | -1.664677 |
| C          | 1.864589  | -1.305178 | -1.214675 | C          | 1.864812  | -1.304806 | -1.21511  |
| C          | 0.91627   | -0.333514 | -0.839795 | C          | 0.916385  | -0.333243 | -0.840232 |
| C          | -0.483384 | -0.563243 | -0.905325 | C          | -0.483249 | -0.563076 | -0.905951 |
| C          | -0.949893 | -1.79855  | -1.395518 | C          | -0.94961  | -1.798381 | -1.396288 |
| N          | 1.096929  | 0.975325  | -0.419002 | N          | 1.096895  | 0.975548  | -0.419205 |
| C          | -0.127984 | 1.585137  | -0.218003 | C          | -0.128112 | 1.585189  | -0.218191 |
| C          | -1.138607 | 0.663889  | -0.497904 | C          | -1.138605 | 0.663892  | -0.498339 |
| C          | -2.569878 | 0.932217  | -0.442513 | C          | -2.569939 | 0.932037  | -0.442993 |
| C          | -3.544201 | 0.128672  | 0.044364  | C          | -3.544093 | 0.128346  | 0.043961  |
| C          | -4.963839 | 0.589034  | -0.005239 | C          | -4.963821 | 0.588519  | -0.005546 |
| N          | -5.886092 | -0.284638 | 0.504133  | N          | -5.885859 | -0.28488  | 0.504722  |
| C          | -5.680582 | -1.693889 | 0.832251  | C          | -5.680171 | -1.694054 | 0.833028  |
| C          | -4.215973 | -2.003643 | 1.132088  | C          | -4.215482 | -2.003627 | 1.13266   |
| N          | -3.292876 | -1.098123 | 0.690917  | N          | -3.292535 | -1.098445 | 0.69041   |
| C          | -0.247799 | 3.042238  | 0.229092  | C          | -0.24821  | 3.04221   | 0.229064  |
| C          | -0.898038 | 3.821276  | -0.91203  | C          | -0.89842  | 3.8213    | -0.912037 |
| C          | -2.025377 | 4.536478  | -0.868615 | C          | -2.0259   | 4.536281  | -0.868633 |
| C          | 1.14101   | 3.678423  | 0.476555  | C          | 1.140435  | 3.678606  | 0.476861  |
| C          | -1.050269 | 3.125634  | 1.546824  | C          | -1.050937 | 3.125279  | 1.546666  |
| C          | -6.207343 | -2.637498 | -0.266493 | C          | -6.206966 | -2.637928 | -0.265523 |
| C          | 3.349725  | -1.026391 | -1.178982 | C          | 3.349925  | -1.025912 | -1.179166 |
| C          | 3.943123  | -0.940732 | 0.236241  | C          | 3.943139  | -0.940737 | 0.236174  |
| C          | 5.301082  | -0.204525 | 0.361293  | C          | 5.300878  | -0.204217 | 0.361728  |
| C          | 6.442359  | -0.853655 | -0.427395 | C          | 6.442408  | -0.852695 | -0.427122 |
| C          | 5.139615  | 1.26481   | -0.076089 | C          | 5.139073  | 1.265282  | -0.074951 |
| O          | 4.00834   | 1.899704  | 0.520051  | O          | 4.00757   | 1.899574  | 0.521415  |
| Cl         | 4.089488  | -2.632719 | 0.952237  | Cl         | 4.089896  | -2.632995 | 0.951412  |
| O          | 5.642392  | -0.091572 | 1.752891  | O          | 5.641989  | -0.091831 | 1.753435  |
| O          | -3.897858 | -3.036321 | 1.712288  | O          | -3.897116 | -3.035917 | 1.713379  |
| O          | -5.291696 | 1.694184  | -0.437642 | O          | -5.291862 | 1.693369  | -0.438549 |
| H          | -0.369639 | -3.729994 | -2.131095 | H          | -0.369134 | -3.729732 | -2.131918 |
| H          | 2.058199  | -3.303332 | -1.960718 | H          | 2.058663  | -3.302888 | -1.961273 |
| H          | -2.013411 | -1.987674 | -1.502639 | H          | -2.013106 | -1.987579 | -1.503528 |

|                                    |           |           |           |                                    |           |           |           |
|------------------------------------|-----------|-----------|-----------|------------------------------------|-----------|-----------|-----------|
| H                                  | 1.992407  | 1.398614  | -0.191815 | H                                  | 1.992289  | 1.398732  | -0.191443 |
| H                                  | -2.922562 | 1.894561  | -0.802138 | H                                  | -2.922781 | 1.894294  | -0.802705 |
| H                                  | -6.843167 | 0.043511  | 0.428708  | H                                  | -6.843017 | 0.042986  | 0.429014  |
| H                                  | -6.218187 | -1.907943 | 1.763126  | H                                  | -6.217617 | -1.907998 | 1.764013  |
| H                                  | -2.325799 | -1.346797 | 0.879942  | H                                  | -2.325389 | -1.346976 | 0.879277  |
| H                                  | -0.342393 | 3.773306  | -1.850328 | H                                  | -0.342656 | 3.773568  | -1.850274 |
| H                                  | -2.384869 | 5.062493  | -1.749215 | H                                  | -2.385392 | 5.062376  | -1.749185 |
| H                                  | -2.639859 | 4.616438  | 0.023839  | H                                  | -2.640498 | 4.615959  | 0.023766  |
| H                                  | 1.681168  | 3.16573   | 1.280578  | H                                  | 1.68046   | 3.166033  | 1.281046  |
| H                                  | 1.006563  | 4.722482  | 0.776657  | H                                  | 1.005757  | 4.722662  | 0.776874  |
| H                                  | 1.771931  | 3.672114  | -0.418838 | H                                  | 1.771608  | 3.672351  | -0.418356 |
| H                                  | -2.060982 | 2.722872  | 1.442542  | H                                  | -2.061586 | 2.722423  | 1.44211   |
| H                                  | -1.126516 | 4.166882  | 1.880897  | H                                  | -1.127363 | 4.166453  | 1.880922  |
| H                                  | -0.540637 | 2.5546    | 2.330966  | H                                  | -0.541388 | 2.554155  | 2.330795  |
| H                                  | -7.277214 | -2.464167 | -0.430117 | H                                  | -5.683388 | -2.465473 | -1.212494 |
| H                                  | -5.683595 | -2.46502  | -1.213368 | H                                  | -6.063702 | -3.679651 | 0.037234  |
| H                                  | -6.064291 | -3.679276 | 0.036174  | H                                  | -7.276896 | -2.464813 | -0.429004 |
| H                                  | 3.885201  | -1.78753  | -1.755302 | H                                  | 3.885541  | -1.786783 | -1.755712 |
| H                                  | 3.539815  | -0.067712 | -1.679908 | H                                  | 3.539978  | -0.067032 | -1.679712 |
| H                                  | 3.241501  | -0.44905  | 0.908985  | H                                  | 3.241286  | -0.44955  | 0.909043  |
| H                                  | 6.215269  | -0.903009 | -1.498652 | H                                  | 6.215405  | -0.901649 | -1.498415 |
| H                                  | 6.630273  | -1.871721 | -0.073571 | H                                  | 6.630541  | -1.870867 | -0.073721 |
| H                                  | 7.359264  | -0.270319 | -0.293299 | H                                  | 7.359147  | -0.269178 | -0.292697 |
| H                                  | 5.00197   | 1.348323  | -1.155901 | H                                  | 5.001504  | 1.349291  | -1.154734 |
| H                                  | 6.062066  | 1.794746  | 0.193579  | H                                  | 6.061347  | 1.79535   | 0.195061  |
| H                                  | 4.142693  | 1.876754  | 1.483063  | H                                  | 4.141751  | 1.875899  | 1.484441  |
| H                                  | 5.611874  | -0.977256 | 2.154564  | H                                  | 5.611593  | -0.977702 | 2.154704  |
| Free Energy = -1857.585457 Hartree |           |           |           | Free Energy = -1857.585447 Hartree |           |           |           |

| conf. 3a-3 | X axis(Å) | Y axis(Å) | Z axis(Å) | conf. 3a-4 | X axis(Å) | Y axis(Å) | Z axis(Å) |
|------------|-----------|-----------|-----------|------------|-----------|-----------|-----------|
| C          | -0.251953 | -2.719663 | -1.789251 | C          | 0.020167  | -3.151902 | 0.638643  |
| C          | 1.140472  | -2.527725 | -1.695863 | C          | 1.334997  | -2.963612 | 0.169371  |
| C          | 1.691455  | -1.324427 | -1.255965 | C          | 1.809962  | -1.709148 | -0.211737 |
| C          | 0.779808  | -0.313519 | -0.896874 | C          | 0.899358  | -0.638811 | -0.116916 |
| C          | -0.627571 | -0.490139 | -0.957576 | C          | -0.444569 | -0.811155 | 0.306367  |
| C          | -1.14063  | -1.712398 | -1.433117 | C          | -0.872273 | -2.089708 | 0.714211  |
| N          | 1.006669  | 0.991954  | -0.495622 | N          | 1.075629  | 0.710946  | -0.379592 |
| C          | -0.191114 | 1.653074  | -0.301841 | C          | -0.096779 | 1.402272  | -0.135064 |
| C          | -1.236782 | 0.766     | -0.56299  | C          | -1.075318 | 0.493686  | 0.273097  |
| C          | -2.663211 | 1.066624  | -0.51517  | C          | -2.448874 | 0.827874  | 0.625858  |
| C          | -3.650621 | 0.298786  | 0.001191  | C          | -3.57494  | 0.145482  | 0.30993   |
| C          | -5.061608 | 0.783496  | -0.069408 | C          | -4.896291 | 0.654297  | 0.783284  |

|    |           |           |           |    |           |           |           |
|----|-----------|-----------|-----------|----|-----------|-----------|-----------|
| N  | -5.999932 | -0.045081 | 0.480894  | N  | -5.976742 | -0.1126   | 0.434415  |
| C  | -5.822211 | -1.434628 | 0.898059  | C  | -5.942929 | -1.502181 | -0.021442 |
| C  | -4.360077 | -1.767912 | 1.18509   | C  | -4.657875 | -1.800839 | -0.798052 |
| N  | -3.42078  | -0.907514 | 0.689665  | N  | -3.59575  | -0.980935 | -0.536915 |
| C  | -0.211928 | 3.132115  | 0.089722  | C  | -0.208372 | 2.912359  | -0.343312 |
| C  | 1.176106  | 3.559362  | 0.546564  | C  | -0.550065 | 3.550135  | 1.00107   |
| C  | 1.975671  | 4.46788   | -0.01831  | C  | -1.596469 | 4.3284    | 1.28963   |
| C  | -1.1645   | 3.361623  | 1.294883  | C  | -1.262534 | 3.208181  | -1.433945 |
| C  | -0.699206 | 3.966371  | -1.118477 | C  | 1.138453  | 3.523928  | -0.798534 |
| C  | -6.401085 | -2.431848 | -0.124172 | C  | -7.184181 | -1.823228 | -0.85563  |
| C  | 3.186502  | -1.109432 | -1.191949 | C  | 3.220806  | -1.514556 | -0.717897 |
| C  | 3.763586  | -1.143375 | 0.232973  | C  | 4.153759  | -0.7951   | 0.268919  |
| C  | 5.178236  | -0.535745 | 0.413193  | C  | 5.432005  | -0.164764 | -0.339328 |
| C  | 6.261831  | -1.213103 | -0.430852 | C  | 6.3805    | -1.174459 | -0.992871 |
| C  | 5.14264   | 0.97488   | 0.105058  | C  | 5.042091  | 0.917696  | -1.365838 |
| O  | 4.094434  | 1.651633  | 0.793452  | O  | 4.045423  | 1.815384  | -0.876598 |
| Cl | 3.759497  | -2.879597 | 0.857172  | Cl | 4.62336   | -1.943885 | 1.63325   |
| O  | 5.524643  | -0.569748 | 1.807709  | O  | 6.111114  | 0.584169  | 0.681962  |
| O  | -4.058311 | -2.781891 | 1.804777  | O  | -4.57518  | -2.750299 | -1.569422 |
| O  | -5.366075 | 1.872699  | -0.556554 | O  | -5.024782 | 1.709852  | 1.403051  |
| H  | -0.632975 | -3.670256 | -2.152481 | H  | -0.297838 | -4.145457 | 0.942536  |
| H  | 1.808966  | -3.336171 | -1.981289 | H  | 2.006096  | -3.81707  | 0.110262  |
| H  | -2.210756 | -1.863285 | -1.536012 | H  | -1.87915  | -2.244665 | 1.088884  |
| H  | 1.910373  | 1.402751  | -0.284885 | H  | 1.95124   | 1.143298  | -0.659959 |
| H  | -3.015446 | 2.011992  | -0.91664  | H  | -2.625095 | 1.744407  | 1.181226  |
| H  | -6.950221 | 0.299831  | 0.394918  | H  | -6.856535 | 0.231314  | 0.805005  |
| H  | -6.342937 | -1.57277  | 1.852866  | H  | -5.923613 | -2.18067  | 0.849709  |
| H  | -2.457269 | -1.17428  | 0.872976  | H  | -2.736706 | -1.227976 | -1.019997 |
| H  | 1.523656  | 3.062415  | 1.454246  | H  | 0.176472  | 3.336073  | 1.787209  |
| H  | 2.946156  | 4.695352  | 0.414033  | H  | -1.724534 | 4.741299  | 2.28684   |
| H  | 1.70581   | 5.011631  | -0.919377 | H  | -2.369708 | 4.570622  | 0.565883  |
| H  | -2.192674 | 3.077058  | 1.057546  | H  | -0.967801 | 2.73304   | -2.376254 |
| H  | -1.155519 | 4.421676  | 1.572841  | H  | -1.339761 | 4.287646  | -1.608224 |
| H  | -0.844099 | 2.776527  | 2.164567  | H  | -2.251897 | 2.830827  | -1.161892 |
| H  | -0.050403 | 3.827337  | -1.989966 | H  | 1.926039  | 3.38706   | -0.04948  |
| H  | -0.716771 | 5.032232  | -0.863491 | H  | 1.010097  | 4.600938  | -0.945609 |
| H  | -1.712786 | 3.677615  | -1.40892  | H  | 1.485539  | 3.093864  | -1.744946 |
| H  | -5.897007 | -2.335003 | -1.092195 | H  | -8.091173 | -1.681354 | -0.255987 |
| H  | -6.277283 | -3.455289 | 0.242352  | H  | -7.238435 | -1.171515 | -1.733885 |
| H  | -7.469917 | -2.240087 | -0.273306 | H  | -7.145879 | -2.861366 | -1.19287  |
| H  | 3.696135  | -1.854512 | -1.81123  | H  | 3.65414   | -2.481489 | -0.992913 |
| H  | 3.425989  | -0.128739 | -1.624956 | H  | 3.186308  | -0.916866 | -1.638364 |
| H  | 3.0935    | -0.629018 | 0.921267  | H  | 3.61546   | -0.004078 | 0.789418  |

|                                    |          |           |           |                                    |          |           |           |
|------------------------------------|----------|-----------|-----------|------------------------------------|----------|-----------|-----------|
| H                                  | 6.044528 | -1.13802  | -1.502647 | H                                  | 5.888409 | -1.725442 | -1.802677 |
| H                                  | 6.348735 | -2.273544 | -0.175547 | H                                  | 6.740353 | -1.901165 | -0.258501 |
| H                                  | 7.227888 | -0.73508  | -0.238595 | H                                  | 7.247213 | -0.648676 | -1.406761 |
| H                                  | 4.98363  | 1.162397  | -0.958837 | H                                  | 4.633432 | 0.475436  | -2.27635  |
| H                                  | 6.119941 | 1.391278  | 0.383347  | H                                  | 5.95425  | 1.46689   | -1.631786 |
| H                                  | 4.233425 | 1.492271  | 1.74311   | H                                  | 4.42133  | 2.26468   | -0.10038  |
| H                                  | 5.403787 | -1.477988 | 2.13525   | H                                  | 6.256286 | 0.002618  | 1.448428  |
| Free Energy = -1857.584994 Hartree |          |           |           | Free Energy = -1857.584966 Hartree |          |           |           |

| conf. 3a-5 | X axis(Å) | Y axis(Å) | Z axis(Å) | conf. 3a-6 | X axis(Å) | Y axis(Å) | Z axis(Å) |
|------------|-----------|-----------|-----------|------------|-----------|-----------|-----------|
| C          | 0.199262  | -3.207306 | -0.411391 | C          | -0.029953 | -2.869637 | -1.643225 |
| C          | -1.111933 | -3.008493 | 0.066003  | C          | 1.355646  | -2.634265 | -1.546601 |
| C          | -1.630914 | -1.733809 | 0.289404  | C          | 1.868986  | -1.396202 | -1.161325 |
| C          | -0.767898 | -0.652231 | 0.024806  | C          | 0.926782  | -0.395128 | -0.85419  |
| C          | 0.569683  | -0.828077 | -0.412444 | C          | -0.474104 | -0.614936 | -0.920055 |
| C          | 1.043811  | -2.130965 | -0.655589 | C          | -0.948737 | -1.871108 | -1.344349 |
| N          | -0.984418 | 0.708324  | 0.12386   | N          | 1.116389  | 0.931558  | -0.50078  |
| C          | 0.156141  | 1.410187  | -0.230199 | C          | -0.104877 | 1.561959  | -0.340305 |
| C          | 1.154973  | 0.493169  | -0.558142 | C          | -1.120729 | 0.638736  | -0.58343  |
| C          | 2.523467  | 0.756689  | -1.005261 | C          | -2.553433 | 0.916539  | -0.581544 |
| C          | 3.649685  | 0.176753  | -0.532147 | C          | -3.538869 | 0.147342  | -0.06461  |
| C          | 4.969158  | 0.543153  | -1.129697 | C          | -4.958004 | 0.592188  | -0.196321 |
| N          | 6.055117  | -0.086858 | -0.585618 | N          | -5.891004 | -0.231522 | 0.373893  |
| C          | 6.049009  | -1.270559 | 0.273551  | C          | -5.692724 | -1.602778 | 0.839269  |
| C          | 4.739241  | -1.398696 | 1.05509   | C          | -4.233196 | -1.885973 | 1.186293  |
| N          | 3.669409  | -0.700181 | 0.568759  | N          | -3.301188 | -1.024092 | 0.681722  |
| C          | 0.115366  | 2.934512  | -0.121418 | C          | -0.198563 | 3.049659  | -0.009938 |
| C          | -0.129826 | 3.273305  | 1.347922  | C          | -1.329304 | 3.282457  | 0.985373  |
| C          | -1.161711 | 3.943525  | 1.868492  | C          | -2.303829 | 4.191337  | 0.904604  |
| C          | -0.98994  | 3.490588  | -1.049858 | C          | -0.389445 | 3.838361  | -1.327968 |
| C          | 1.452185  | 3.597092  | -0.524777 | C          | 1.096783  | 3.554211  | 0.67985   |
| C          | 7.255239  | -1.256558 | 1.216172  | C          | -6.207669 | -2.645961 | -0.171379 |
| C          | -3.032732 | -1.517634 | 0.812284  | C          | 3.35636   | -1.128884 | -1.127155 |
| C          | -4.017095 | -0.97089  | -0.235142 | C          | 3.930387  | -0.921255 | 0.283093  |
| C          | -5.274115 | -0.254011 | 0.320938  | C          | 5.29192   | -0.18487  | 0.363708  |
| C          | -6.153329 | -1.136073 | 1.212072  | C          | 6.44362   | -0.915108 | -0.334379 |
| C          | -4.856245 | 1.014146  | 1.093239  | C          | 5.154121  | 1.23495   | -0.219812 |
| O          | -3.958431 | 1.838502  | 0.350965  | O          | 4.012627  | 1.933949  | 0.278312  |
| Cl         | -4.534026 | -2.332628 | -1.366548 | Cl         | 4.05487   | -2.542932 | 1.150599  |
| O          | -6.031708 | 0.279197  | -0.778211 | O          | 5.606171  | 0.058922  | 1.744667  |
| O          | 4.648869  | -2.128034 | 2.036103  | O          | -3.926279 | -2.864347 | 1.859332  |
| O          | 5.08633   | 1.385362  | -2.019171 | O          | -5.27774  | 1.645103  | -0.74804  |



|                                    |           |           |           |                                    |           |           |           |
|------------------------------------|-----------|-----------|-----------|------------------------------------|-----------|-----------|-----------|
| H                                  | 0.552537  | -4.220085 | -0.584894 | H                                  | -0.381077 | -3.846519 | -1.964376 |
| H                                  | -1.742644 | -3.872425 | 0.261355  | H                                  | 2.049084  | -3.435437 | -1.790763 |
| H                                  | 2.050062  | -2.293888 | -1.029714 | H                                  | -2.013192 | -2.055592 | -1.450214 |
| H                                  | -1.860623 | 1.153127  | 0.382726  | H                                  | 2.016628  | 1.360671  | -0.30477  |
| H                                  | 2.699023  | 1.477827  | -1.795692 | H                                  | -2.905039 | 1.844882  | -1.01877  |
| H                                  | 6.93381   | 0.15767   | -1.030354 | H                                  | -6.846594 | 0.08151   | 0.238548  |
| H                                  | 6.105747  | -2.180394 | -0.348703 | H                                  | -6.242936 | -1.726465 | 1.779258  |
| H                                  | 2.797502  | -0.851372 | 1.068711  | H                                  | -2.337984 | -1.255258 | 0.9091    |
| H                                  | 0.657402  | 2.919528  | 2.016126  | H                                  | -1.276173 | 2.649321  | 1.872373  |
| H                                  | -1.214578 | 4.139762  | 2.936636  | H                                  | -3.036797 | 4.291965  | 1.700463  |
| H                                  | -1.986684 | 4.316416  | 1.267894  | H                                  | -2.432966 | 4.846588  | 0.047538  |
| H                                  | -0.789567 | 3.196362  | -2.085746 | H                                  | 0.438626  | 3.6289    | -2.01382  |
| H                                  | -1.007061 | 4.585393  | -1.004238 | H                                  | -0.403587 | 4.917586  | -1.136349 |
| H                                  | -1.985638 | 3.128227  | -0.778533 | H                                  | -1.322298 | 3.566166  | -1.831506 |
| H                                  | 2.293551  | 3.230025  | 0.070327  | H                                  | 1.296081  | 3.005427  | 1.608394  |
| H                                  | 1.371702  | 4.677845  | -0.365733 | H                                  | 0.975158  | 4.61097   | 0.937693  |
| H                                  | 1.680323  | 3.430412  | -1.582254 | H                                  | 1.974643  | 3.469498  | 0.030544  |
| H                                  | 8.187336  | -1.246458 | 0.638829  | H                                  | -7.275449 | -2.489106 | -0.363176 |
| H                                  | 7.232193  | -0.370873 | 1.859725  | H                                  | -5.672643 | -2.563047 | -1.124021 |
| H                                  | 7.242892  | -2.148591 | 1.846376  | H                                  | -6.069013 | -3.654531 | 0.229709  |
| H                                  | -3.424412 | -2.449738 | 1.231812  | H                                  | 3.892701  | -1.942681 | -1.625346 |
| H                                  | -2.992514 | -0.798318 | 1.641317  | H                                  | 3.562656  | -0.219643 | -1.707592 |
| H                                  | -3.508998 | -0.275176 | -0.902071 | H                                  | 3.223557  | -0.367766 | 0.899995  |
| H                                  | -5.603351 | -1.494556 | 2.089837  | H                                  | 6.23431   | -1.074576 | -1.398503 |
| H                                  | -6.517122 | -2.007984 | 0.660232  | H                                  | 6.621814  | -1.8913   | 0.126116  |
| H                                  | -7.02011  | -0.562148 | 1.555561  | H                                  | 7.360727  | -0.323371 | -0.245706 |
| H                                  | -4.346269 | 0.768662  | 2.026918  | H                                  | 5.046112  | 1.210946  | -1.305708 |
| H                                  | -5.771646 | 1.568405  | 1.338067  | H                                  | 6.072987  | 1.784312  | 0.021057  |
| H                                  | -4.403829 | 2.056168  | -0.486456 | H                                  | 4.123866  | 2.020594  | 1.240561  |
| H                                  | -6.200717 | -0.43527  | -1.416694 | H                                  | 5.559389  | -0.78464  | 2.227432  |
| Free Energy = -1857.584487 Hartree |           |           |           | Free Energy = -1857.584243 Hartree |           |           |           |

**Table S21.** The Cartesian coordinates of the lowest energy conformers (Conf. 1-8) for isomer **3b**.

| conf. 3b-1 | X axis(Å) | Y axis(Å) | Z axis(Å) | conf. 3b-2 | X axis(Å) | Y axis(Å) | Z axis(Å) |
|------------|-----------|-----------|-----------|------------|-----------|-----------|-----------|
| C          | 0.401659  | -3.278717 | -0.479988 | C          | 0.408932  | -3.262814 | -0.603157 |
| C          | -0.923921 | -3.183461 | -0.007237 | C          | -0.90212  | -3.164565 | -0.091021 |
| C          | -1.498402 | -1.956525 | 0.320657  | C          | -1.470111 | -1.93661  | 0.24423   |
| C          | -0.677943 | -0.823531 | 0.16688   | C          | -0.657446 | -0.802324 | 0.056492  |
| C          | 0.668981  | -0.89258  | -0.270415 | C          | 0.672998  | -0.875438 | -0.425354 |
| C          | 1.201043  | -2.149986 | -0.620235 | C          | 1.200159  | -2.133439 | -0.77778  |
| N          | -0.975575 | 0.510091  | 0.377186  | N          | -0.943893 | 0.53204   | 0.267708  |

|    |           |           |           |    |           |           |           |
|----|-----------|-----------|-----------|----|-----------|-----------|-----------|
| C  | 0.11923   | 1.296247  | 0.08638   | C  | 0.142857  | 1.317519  | -0.070523 |
| C  | 1.173879  | 0.467772  | -0.308422 | C  | 1.181317  | 0.483165  | -0.49052  |
| C  | 2.495973  | 0.897435  | -0.748922 | C  | 2.523805  | 0.862072  | -0.930122 |
| C  | 3.692085  | 0.347854  | -0.4344   | C  | 3.691174  | 0.314711  | -0.520612 |
| C  | 4.937855  | 0.929687  | -1.01523  | C  | 4.975426  | 0.813621  | -1.09727  |
| N  | 6.101063  | 0.30957   | -0.647615 | N  | 6.107539  | 0.213806  | -0.617089 |
| C  | 6.233832  | -1.010164 | -0.030746 | C  | 6.191771  | -1.03203  | 0.144419  |
| C  | 4.998229  | -1.372558 | 0.797418  | C  | 4.901767  | -1.314222 | 0.918282  |
| N  | 3.849438  | -0.694158 | 0.499197  | N  | 3.782197  | -0.650974 | 0.499556  |
| C  | 0.032873  | 2.818369  | 0.205005  | C  | 0.061198  | 2.819037  | 0.20067   |
| C  | -1.155469 | 3.199106  | 1.078766  | C  | -1.303418 | 3.321891  | -0.257416 |
| C  | -2.193708 | 3.972762  | 0.74871   | C  | -2.225056 | 3.95362   | 0.475495  |
| C  | -0.065022 | 3.432539  | -1.210746 | C  | 1.114287  | 3.625015  | -0.59773  |
| C  | 1.287055  | 3.385369  | 0.927306  | C  | 0.302835  | 3.057973  | 1.711021  |
| C  | 7.506847  | -1.080387 | 0.816103  | C  | 7.403228  | -1.008939 | 1.080255  |
| C  | -2.921074 | -1.818676 | 0.809651  | C  | -2.872567 | -1.800338 | 0.788519  |
| C  | -3.878429 | -1.233615 | -0.256292 | C  | -3.873853 | -1.218846 | -0.237525 |
| C  | -4.868285 | -0.184307 | 0.299801  | C  | -4.844665 | -0.1742   | 0.359508  |
| O  | -3.98773  | 0.838512  | 0.81642   | O  | -3.947402 | 0.850936  | 0.840654  |
| C  | -5.695717 | 0.444261  | -0.837705 | C  | -5.720907 | 0.450409  | -0.74295  |
| O  | -6.238848 | 1.66363   | -0.309724 | O  | -6.248026 | 1.667344  | -0.193723 |
| Cl | -4.771782 | -2.576491 | -1.130025 | Cl | -4.795929 | -2.564847 | -1.076397 |
| C  | -5.775002 | -0.707882 | 1.41896   | C  | -5.702853 | -0.703165 | 1.513896  |
| O  | 5.031764  | -2.256013 | 1.646543  | O  | 4.871867  | -2.129242 | 1.833404  |
| O  | 4.934734  | 1.925491  | -1.739462 | O  | 5.026243  | 1.732542  | -1.914675 |
| H  | 0.802629  | -4.255227 | -0.738006 | H  | 0.804116  | -4.241493 | -0.861827 |
| H  | -1.518963 | -4.087628 | 0.097472  | H  | -1.490538 | -4.069256 | 0.043102  |
| H  | 2.213824  | -2.240531 | -1.000646 | H  | 2.204029  | -2.221309 | -1.182613 |
| H  | -1.89674  | 0.864208  | 0.627169  | H  | -1.855653 | 0.891206  | 0.543542  |
| H  | 2.575038  | 1.762798  | -1.400641 | H  | 2.642768  | 1.654922  | -1.660203 |
| H  | 6.929144  | 0.703214  | -1.082247 | H  | 6.962088  | 0.552408  | -1.046903 |
| H  | 6.296132  | -1.783329 | -0.816231 | H  | 6.305497  | -1.882901 | -0.549293 |
| H  | 3.030964  | -0.986666 | 1.025905  | H  | 2.927975  | -0.904433 | 0.988623  |
| H  | -1.099731 | 2.816222  | 2.099752  | H  | -1.501661 | 3.159267  | -1.31868  |
| H  | -2.958258 | 4.219824  | 1.481628  | H  | -3.149032 | 4.307193  | 0.023867  |
| H  | -2.320114 | 4.3984    | -0.243082 | H  | -2.098722 | 4.154052  | 1.536112  |
| H  | 0.808119  | 3.159181  | -1.810242 | H  | 2.132891  | 3.377833  | -0.286654 |
| H  | -0.957079 | 3.079578  | -1.73993  | H  | 1.029239  | 3.449345  | -1.675827 |
| H  | -0.102771 | 4.52666   | -1.155051 | H  | 0.956231  | 4.69366   | -0.417054 |
| H  | 1.395904  | 2.948135  | 1.926217  | H  | -0.440322 | 2.544417  | 2.330276  |
| H  | 2.203755  | 3.181919  | 0.369127  | H  | 1.291967  | 2.681392  | 1.990904  |
| H  | 1.18548   | 4.470937  | 1.036958  | H  | 0.269211  | 4.12862   | 1.94501   |
| H  | 8.388835  | -0.899307 | 0.190288  | H  | 8.326471  | -0.8856   | 0.501679  |

|                                   |           |           |           |                                    |           |           |           |
|-----------------------------------|-----------|-----------|-----------|------------------------------------|-----------|-----------|-----------|
| H                                 | 7.48221   | -0.32974  | 1.612921  | H                                  | 7.324403  | -0.182195 | 1.794057  |
| H                                 | 7.595841  | -2.070045 | 1.269531  | H                                  | 7.460041  | -1.947796 | 1.63554   |
| H                                 | -3.29841  | -2.785772 | 1.153356  | H                                  | -3.233913 | -2.76728  | 1.149371  |
| H                                 | -2.93818  | -1.147013 | 1.67617   | H                                  | -2.854859 | -1.12667  | 1.653466  |
| H                                 | -3.300137 | -0.749155 | -1.045307 | H                                  | -3.329819 | -0.731516 | -1.04889  |
| H                                 | -6.434278 | 0.094346  | 1.764504  | H                                  | -6.353756 | 0.094599  | 1.88484   |
| H                                 | -6.394505 | -1.538505 | 1.065031  | H                                  | -6.329932 | -1.538458 | 1.184966  |
| H                                 | -5.180084 | -1.052508 | 2.269557  | H                                  | -5.072482 | -1.042729 | 2.340646  |
| H                                 | -6.49594  | -0.233229 | -1.153629 | H                                  | -6.529705 | -0.231664 | -1.025222 |
| H                                 | -5.044146 | 0.658554  | -1.695787 | H                                  | -5.106609 | 0.667626  | -1.627431 |
| H                                 | -6.686658 | 2.152652  | -1.015512 | H                                  | -6.746348 | 2.142375  | -0.874762 |
| H                                 | -4.484868 | 1.676805  | 0.797752  | H                                  | -4.447698 | 1.68741   | 0.84675   |
| Free Energy = -1857.58397 Hartree |           |           |           | Free Energy = -1857.583967 Hartree |           |           |           |

| conf. 3b-3 | X axis(Å) | Y axis(Å) | Z axis(Å) | conf. 3b-4 | X axis(Å) | Y axis(Å) | Z axis(Å) |
|------------|-----------|-----------|-----------|------------|-----------|-----------|-----------|
| C          | 0.192491  | -3.261724 | -0.670773 | C          | -0.444383 | -2.848172 | -1.959067 |
| C          | -1.130292 | -3.155581 | -0.192425 | C          | 0.957215  | -2.736664 | -1.838174 |
| C          | -1.661447 | -1.935793 | 0.222916  | C          | 1.565794  | -1.555803 | -1.41652  |
| C          | -0.80144  | -0.825286 | 0.150861  | C          | 0.703494  | -0.490022 | -1.098065 |
| C          | 0.543907  | -0.907166 | -0.288574 | C          | -0.707746 | -0.579776 | -1.192575 |
| C          | 1.031575  | -2.154595 | -0.72834  | C          | -1.28199  | -1.782059 | -1.651595 |
| N          | -1.061195 | 0.500155  | 0.447633  | N          | 1.006162  | 0.797534  | -0.704561 |
| C          | 0.057174  | 1.27047   | 0.206897  | C          | -0.150531 | 1.538698  | -0.54923  |
| C          | 1.089996  | 0.436318  | -0.232697 | C          | -1.245139 | 0.719892  | -0.831937 |
| C          | 2.430668  | 0.874339  | -0.593471 | C          | -2.667039 | 1.065221  | -0.807428 |
| C          | 3.607012  | 0.260565  | -0.322363 | C          | -3.651839 | 0.367477  | -0.197432 |
| C          | 4.880649  | 0.87788   | -0.795225 | C          | -5.065676 | 0.828401  | -0.330427 |
| N          | 6.018565  | 0.179229  | -0.488223 | N          | -5.997044 | 0.08746   | 0.342661  |
| C          | 6.092981  | -1.222666 | -0.077194 | C          | -5.771688 | -0.952231 | 1.344822  |
| C          | 4.842067  | -1.641983 | 0.69941   | C          | -4.328557 | -1.45748  | 1.353459  |
| N          | 3.720202  | -0.892905 | 0.479868  | N          | -3.421858 | -0.77564  | 0.591995  |
| C          | 0.056923  | 2.780212  | 0.444371  | C          | -0.027751 | 2.966285  | -0.01988  |
| C          | 0.303218  | 3.466844  | -0.896741 | C          | 1.162723  | 3.6294    | -0.704721 |
| C          | 1.280769  | 4.323561  | -1.204779 | C          | 2.23253   | 4.179746  | -0.123219 |
| C          | 1.116176  | 3.142985  | 1.508907  | C          | 0.129932  | 2.912338  | 1.518793  |
| C          | -1.322656 | 3.266261  | 0.955048  | C          | -1.26764  | 3.828998  | -0.358776 |
| C          | 7.362982  | -1.476019 | 0.737059  | C          | -6.754187 | -2.114789 | 1.153928  |
| C          | -3.07709  | -1.777693 | 0.725664  | C          | 3.063361  | -1.386898 | -1.316846 |
| C          | -4.007354 | -1.059178 | -0.28005  | C          | 3.577868  | -1.331508 | 0.141399  |
| C          | -4.978534 | -0.04936  | 0.373143  | C          | 4.670177  | -0.264096 | 0.381519  |
| O          | -4.081772 | 0.92067   | 0.96488   | O          | 3.987838  | 0.965335  | 0.047437  |
| C          | -5.811993 | 0.684518  | -0.694459 | C          | 5.053023  | -0.194209 | 1.871902  |

|                                    |           |           |           |                                    |           |           |           |
|------------------------------------|-----------|-----------|-----------|------------------------------------|-----------|-----------|-----------|
| O                                  | -6.341712 | 1.852666  | -0.05015  | O                                  | 5.724009  | 1.06175   | 2.052216  |
| Cl                                 | -4.923701 | -2.281789 | -1.293364 | Cl                                 | 4.150623  | -2.986254 | 0.685058  |
| C                                  | -5.879494 | -0.6566   | 1.45422   | C                                  | 5.91325   | -0.430919 | -0.499804 |
| O                                  | 4.83848   | -2.622584 | 1.435599  | O                                  | -4.005735 | -2.416628 | 2.045963  |
| O                                  | 4.924522  | 1.960713  | -1.379338 | O                                  | -5.38684  | 1.796183  | -1.020148 |
| H                                  | 0.559932  | -4.230076 | -0.999661 | H                                  | -0.872309 | -3.784359 | -2.307436 |
| H                                  | -1.756711 | -4.043565 | -0.153537 | H                                  | 1.582889  | -3.589345 | -2.091327 |
| H                                  | 2.040996  | -2.253227 | -1.115266 | H                                  | -2.357094 | -1.872434 | -1.778247 |
| H                                  | -1.967798 | 0.851252  | 0.741636  | H                                  | 1.943689  | 1.138356  | -0.50337  |
| H                                  | 2.532668  | 1.820698  | -1.116587 | H                                  | -3.013615 | 1.945592  | -1.33802  |
| H                                  | 6.865667  | 0.598813  | -0.856937 | H                                  | -6.943852 | 0.439095  | 0.245198  |
| H                                  | 6.115971  | -1.872864 | -0.969518 | H                                  | -5.929645 | -0.529192 | 2.35023   |
| H                                  | 2.888546  | -1.217892 | 0.964865  | H                                  | -2.468008 | -1.120938 | 0.658219  |
| H                                  | -0.431365 | 3.21236   | -1.663177 | H                                  | 1.084931  | 3.663648  | -1.792921 |
| H                                  | 1.345897  | 4.759515  | -2.198308 | H                                  | 3.006187  | 4.657381  | -0.71935  |
| H                                  | 2.0575    | 4.610883  | -0.501831 | H                                  | 2.377883  | 4.187994  | 0.953983  |
| H                                  | 0.891102  | 2.628235  | 2.449571  | H                                  | -0.745935 | 2.429943  | 1.964627  |
| H                                  | 2.124089  | 2.853054  | 1.20069   | H                                  | 1.017184  | 2.343438  | 1.817562  |
| H                                  | 1.110383  | 4.222107  | 1.702052  | H                                  | 0.210629  | 3.922826  | 1.936604  |
| H                                  | -2.122441 | 3.069497  | 0.231645  | H                                  | -1.461256 | 3.853988  | -1.43685  |
| H                                  | -1.587932 | 2.792848  | 1.908245  | H                                  | -2.165607 | 3.460904  | 0.144945  |
| H                                  | -1.283867 | 4.348089  | 1.116724  | H                                  | -1.090069 | 4.856773  | -0.024443 |
| H                                  | 8.250938  | -1.246035 | 0.136207  | H                                  | -7.786644 | -1.755021 | 1.236192  |
| H                                  | 7.376204  | -0.851343 | 1.636326  | H                                  | -6.62353  | -2.572828 | 0.167731  |
| H                                  | 7.406397  | -2.524607 | 1.03959   | H                                  | -6.584579 | -2.872505 | 1.922661  |
| H                                  | -3.499372 | -2.752378 | 0.985427  | H                                  | 3.573426  | -2.189017 | -1.857414 |
| H                                  | -3.064254 | -1.18473  | 1.648369  | H                                  | 3.34768   | -0.446704 | -1.804646 |
| H                                  | -3.41016  | -0.509844 | -1.010629 | H                                  | 2.750349  | -1.106976 | 0.817259  |
| H                                  | -6.53926  | 0.115314  | 1.862439  | H                                  | 6.633635  | 0.362209  | -0.276694 |
| H                                  | -6.499963 | -1.458584 | 1.040816  | H                                  | 6.395596  | -1.397058 | -0.317863 |
| H                                  | -5.280806 | -1.063864 | 2.273645  | H                                  | 5.64828   | -0.365472 | -1.558796 |
| H                                  | -6.619326 | 0.042774  | -1.061935 | H                                  | 5.709603  | -1.028179 | 2.141112  |
| H                                  | -5.167617 | 0.972722  | -1.53607  | H                                  | 4.146115  | -0.233699 | 2.490589  |
| H                                  | -6.800116 | 2.40481   | -0.700328 | H                                  | 5.924685  | 1.19203   | 2.990543  |
| H                                  | -4.60125  | 1.737524  | 1.081403  | H                                  | 4.472588  | 1.686276  | 0.488784  |
| Free Energy = -1857.583667 Hartree |           |           |           | Free Energy = -1857.583667 Hartree |           |           |           |

| conf. 3b-5 | X axis(Å) | Y axis(Å) | Z axis(Å) | conf. 3b-6 | X axis(Å) | Y axis(Å) | Z axis(Å) |
|------------|-----------|-----------|-----------|------------|-----------|-----------|-----------|
| C          | 0.14917   | -3.303795 | -0.504358 | C          | 0.149803  | -3.303951 | -0.503707 |
| C          | -1.170975 | -3.157055 | -0.029176 | C          | -1.170511 | -3.157439 | -0.028919 |
| C          | -1.692716 | -1.908681 | 0.304987  | C          | -1.692556 | -1.909152 | 0.305058  |
| C          | -0.825827 | -0.811374 | 0.155065  | C          | -0.825819 | -0.811685 | 0.155339  |

|    |           |           |           |    |           |           |           |
|----|-----------|-----------|-----------|----|-----------|-----------|-----------|
| C  | 0.51667   | -0.931173 | -0.283861 | C  | 0.516825  | -0.931251 | -0.283173 |
| C  | 0.994746  | -2.208473 | -0.640394 | C  | 0.995231  | -2.208486 | -0.639507 |
| N  | -1.075193 | 0.532407  | 0.364509  | N  | -1.075544 | 0.532077  | 0.364533  |
| C  | 0.04743   | 1.277678  | 0.068796  | C  | 0.047009  | 1.277539  | 0.069113  |
| C  | 1.071775  | 0.409715  | -0.318665 | C  | 1.071657  | 0.409759  | -0.317985 |
| C  | 2.412798  | 0.806281  | -0.727064 | C  | 2.412594  | 0.806621  | -0.726319 |
| C  | 3.585657  | 0.201456  | -0.426406 | C  | 3.585571  | 0.201878  | -0.42592  |
| C  | 4.85512   | 0.759479  | -0.976659 | C  | 4.854895  | 0.760133  | -0.976292 |
| N  | 5.994774  | 0.090947  | -0.614754 | N  | 5.994567  | 0.091173  | -0.615278 |
| C  | 6.075557  | -1.257744 | -0.054348 | C  | 6.075318  | -1.257699 | -0.055292 |
| C  | 4.822302  | -1.606783 | 0.752362  | C  | 4.822632  | -1.606283 | 0.752542  |
| N  | 3.69986   | -0.881225 | 0.468054  | N  | 3.70002   | -0.880901 | 0.468371  |
| C  | 0.04155   | 2.801815  | 0.172977  | C  | 0.040761  | 2.801677  | 0.173063  |
| C  | 1.249834  | 3.250299  | 0.987845  | C  | 1.249065  | 3.250637  | 0.987634  |
| C  | 2.175257  | 4.147631  | 0.640902  | C  | 2.174106  | 4.148265  | 0.640434  |
| C  | -1.214521 | 3.302058  | 0.933173  | C  | -1.2153   | 3.301691  | 0.933431  |
| C  | 0.016418  | 3.40924   | -1.249912 | C  | 0.015176  | 3.408825  | -1.249944 |
| C  | 7.340102  | -1.411286 | 0.793796  | C  | 7.340628  | -1.412061 | 0.791451  |
| C  | -3.104388 | -1.706602 | 0.802426  | C  | -3.104366 | -1.707263 | 0.802163  |
| C  | -4.030553 | -1.03438  | -0.238165 | C  | -4.030276 | -1.034682 | -0.238408 |
| C  | -4.999582 | 0.006943  | 0.366569  | C  | -4.999209 | 0.006678  | 0.366404  |
| O  | -4.100446 | 1.000315  | 0.914472  | O  | -4.09996  | 0.999753  | 0.914759  |
| C  | -5.829818 | 0.69488   | -0.733723 | C  | -5.829081 | 0.695003  | -0.733906 |
| O  | -6.358454 | 1.890886  | -0.141775 | O  | -6.357343 | 1.891119  | -0.141923 |
| Cl | -4.948278 | -2.301013 | -1.194167 | Cl | -4.948158 | -2.300925 | -1.194758 |
| C  | -5.903431 | -0.54909  | 1.472504  | C  | -5.903341 | -0.549493 | 1.472027  |
| O  | 4.819343  | -2.51864  | 1.572368  | O  | 4.820117  | -2.517656 | 1.573065  |
| O  | 4.894482  | 1.772904  | -1.67459  | O  | 4.894139  | 1.774046  | -1.673508 |
| H  | 0.509043  | -4.294464 | -0.768817 | H  | 0.509931  | -4.294561 | -0.768041 |
| H  | -1.802792 | -4.036338 | 0.071835  | H  | -1.802197 | -4.036835 | 0.07194   |
| H  | 2.001636  | -2.339567 | -1.024322 | H  | 2.002253  | -2.339431 | -1.023129 |
| H  | -1.972267 | 0.906818  | 0.657982  | H  | -1.972654 | 0.906269  | 0.658227  |
| H  | 2.530525  | 1.705272  | -1.322339 | H  | 2.53015   | 1.705812  | -1.321321 |
| H  | 6.837557  | 0.46645   | -1.037019 | H  | 6.837393  | 0.467011  | -1.037144 |
| H  | 6.113717  | -1.99938  | -0.871474 | H  | 6.112225  | -1.999141 | -0.872671 |
| H  | 2.87047   | -1.158507 | 0.985488  | H  | 2.87092   | -1.157863 | 0.986443  |
| H  | 1.313174  | 2.785553  | 1.973199  | H  | 1.312776  | 2.786005  | 1.973018  |
| H  | 2.980923  | 4.406581  | 1.322669  | H  | 2.979809  | 4.407549  | 1.322032  |
| H  | 2.191032  | 4.637407  | -0.328822 | H  | 2.189576  | 4.637919  | -0.329354 |
| H  | -2.138953 | 3.048641  | 0.400232  | H  | -2.139771 | 3.047828  | 0.400769  |
| H  | -1.270174 | 2.887261  | 1.946337  | H  | -1.270573 | 2.887114  | 1.946709  |
| H  | -1.170201 | 4.392065  | 1.021133  | H  | -1.171319 | 4.391732  | 1.02112   |
| H  | 0.900787  | 3.135152  | -1.832116 | H  | 0.899576  | 3.134954  | -1.832206 |

|                                    |           |           |           |                                   |           |           |           |
|------------------------------------|-----------|-----------|-----------|-----------------------------------|-----------|-----------|-----------|
| H                                  | -0.866128 | 3.053542  | -1.792964 | H                                 | -0.867317 | 3.052679  | -1.792789 |
| H                                  | -0.034107 | 4.503278  | -1.201149 | H                                 | -0.035766 | 4.502854  | -1.201399 |
| H                                  | 8.231744  | -1.237037 | 0.179772  | H                                 | 8.231746  | -1.238194 | 0.176558  |
| H                                  | 7.339145  | -0.694659 | 1.621742  | H                                 | 7.340931  | -0.69564  | 1.619582  |
| H                                  | 7.389879  | -2.421785 | 1.205431  | H                                 | 7.390279  | -2.422668 | 1.202833  |
| H                                  | -3.536603 | -2.659995 | 1.118882  | H                                 | -3.536634 | -2.660781 | 1.118185  |
| H                                  | -3.080767 | -1.061473 | 1.68927   | H                                 | -3.080968 | -1.062458 | 1.689246  |
| H                                  | -3.430993 | -0.52114  | -0.992634 | H                                 | -3.430536 | -0.521395 | -0.992704 |
| H                                  | -6.561008 | 0.241887  | 1.846228  | H                                 | -6.560741 | 0.241541  | 1.845932  |
| H                                  | -6.526191 | -1.366007 | 1.093055  | H                                 | -6.526261 | -1.366114 | 1.09221   |
| H                                  | -5.307006 | -0.923044 | 2.309286  | H                                 | -5.307114 | -0.923901 | 2.308749  |
| H                                  | -6.638037 | 0.039717  | -1.074853 | H                                 | -6.637465 | 0.040129  | -1.075214 |
| H                                  | -5.182904 | 0.944695  | -1.585617 | H                                 | -5.181982 | 0.94469   | -1.585706 |
| H                                  | -6.820171 | 2.412047  | -0.814765 | H                                 | -6.820455 | 2.411609  | -0.814471 |
| H                                  | -4.621556 | 1.819395  | 1.004689  | H                                 | -4.62091  | 1.818898  | 1.005238  |
| Free Energy = -1857.583526 Hartree |           |           |           | Free Energy = -1857.58352 Hartree |           |           |           |

| conf. 3b-7 | X axis(Å) | Y axis(Å) | Z axis(Å) | conf. 3b-8 | X axis(Å) | Y axis(Å) | Z axis(Å) |
|------------|-----------|-----------|-----------|------------|-----------|-----------|-----------|
| C          | -0.23019  | -3.040656 | -1.528502 | C          | -0.229871 | -3.040526 | -1.528819 |
| C          | 1.167551  | -2.8531   | -1.497585 | C          | 1.167835  | -2.852819 | -1.497906 |
| C          | 1.73133   | -1.609555 | -1.217531 | C          | 1.731488  | -1.609198 | -1.217864 |
| C          | 0.830292  | -0.563632 | -0.949338 | C          | 0.830342  | -0.56338  | -0.949676 |
| C          | -0.577715 | -0.72764  | -0.942449 | C          | -0.577673 | -0.72756  | -0.942738 |
| C          | -1.106756 | -1.994083 | -1.264353 | C          | -1.106557 | -1.994051 | -1.264657 |
| N          | 1.09415   | 0.77092   | -0.701141 | N          | 1.094048  | 0.771201  | -0.701502 |
| C          | -0.085667 | 1.466925  | -0.536529 | C          | -0.085855 | 1.467048  | -0.536733 |
| C          | -1.154251 | 0.575616  | -0.664397 | C          | -1.154331 | 0.575623  | -0.664636 |
| C          | -2.566121 | 0.926844  | -0.592588 | C          | -2.566231 | 0.926721  | -0.592731 |
| C          | -3.567867 | 0.228456  | -0.009147 | C          | -3.567853 | 0.228308  | -0.009121 |
| C          | -4.961031 | 0.758594  | -0.07872  | C          | -4.961072 | 0.75834   | -0.078521 |
| N          | -5.91345  | 0.001329  | 0.54921   | N          | -5.9133   | 0.001183  | 0.549859  |
| C          | -5.77561  | -1.375518 | 1.020024  | C          | -5.775358 | -1.375758 | 1.020378  |
| C          | -4.321616 | -1.736854 | 1.313312  | C          | -4.321309 | -1.73708  | 1.313423  |
| N          | -3.364852 | -0.941152 | 0.750555  | N          | -3.36467  | -0.941223 | 0.75069   |
| C          | -0.091293 | 2.974926  | -0.293219 | C          | -0.091635 | 2.975045  | -0.29335  |
| C          | -0.988833 | 3.287266  | 0.899194  | C          | -0.9891   | 3.287224  | 0.899162  |
| C          | -1.99894  | 4.158601  | 0.948145  | C          | -1.999286 | 4.158454  | 0.948254  |
| C          | -0.537045 | 3.694515  | -1.588731 | C          | -0.537619 | 3.694655  | -1.588773 |
| C          | 1.327157  | 3.483956  | 0.073812  | C          | 1.326791  | 3.484235  | 0.073566  |
| C          | -6.387689 | -2.396563 | 0.041077  | C          | -6.3875   | -2.396678 | 0.041326  |
| C          | 3.219783  | -1.35386  | -1.2202   | C          | 3.21992   | -1.353381 | -1.220432 |
| C          | 3.80498   | -1.130555 | 0.194023  | C          | 3.805011  | -1.130466 | 0.193936  |

|                                    |           |           |           |                                    |           |           |           |
|------------------------------------|-----------|-----------|-----------|------------------------------------|-----------|-----------|-----------|
| C                                  | 4.863924  | -0.006829 | 0.266207  | C                                  | 4.86397   | -0.006739 | 0.266505  |
| O                                  | 4.113406  | 1.166996  | -0.125986 | O                                  | 4.113475  | 1.167157  | -0.125387 |
| C                                  | 5.33824   | 0.212211  | 1.715492  | C                                  | 5.338198  | 0.211931  | 1.715881  |
| O                                  | 5.960996  | 1.505381  | 1.737582  | O                                  | 5.961194  | 1.505     | 1.738323  |
| Cl                                 | 4.473035  | -2.699809 | 0.866486  | Cl                                 | 4.472882  | -2.699895 | 0.866036  |
| C                                  | 6.05382   | -0.207068 | -0.678576 | C                                  | 6.053952  | -0.206731 | -0.678231 |
| O                                  | -4.042811 | -2.717949 | 1.995057  | O                                  | -4.042361 | -2.718299 | 1.994946  |
| O                                  | -5.243999 | 1.822203  | -0.630986 | O                                  | -5.244232 | 1.821775  | -0.631028 |
| H                                  | -0.626691 | -4.023098 | -1.770412 | H                                  | -0.626268 | -4.023009 | -1.770737 |
| H                                  | 1.823708  | -3.69361  | -1.710996 | H                                  | 1.824089  | -3.693249 | -1.711321 |
| H                                  | -2.179167 | -2.152552 | -1.320816 | H                                  | -2.178951 | -2.152641 | -1.321153 |
| H                                  | 2.026311  | 1.148769  | -0.559112 | H                                  | 2.026149  | 1.149071  | -0.559154 |
| H                                  | -2.88981  | 1.868042  | -1.023406 | H                                  | -2.890061 | 1.867839  | -1.023625 |
| H                                  | -6.853891 | 0.3698    | 0.453435  | H                                  | -6.853803 | 0.369472  | 0.453942  |
| H                                  | -6.294794 | -1.459873 | 1.981629  | H                                  | -6.294432 | -1.460311 | 1.982025  |
| H                                  | -2.407524 | -1.222281 | 0.943079  | H                                  | -2.407297 | -1.22243  | 0.942866  |
| H                                  | -0.725306 | 2.73862   | 1.805143  | H                                  | -0.725426 | 2.73855   | 1.805052  |
| H                                  | -2.553869 | 4.315191  | 1.869318  | H                                  | -2.554165 | 4.314937  | 1.869475  |
| H                                  | -2.333349 | 4.725584  | 0.083707  | H                                  | -2.33381  | 4.725478  | 0.083883  |
| H                                  | 0.138836  | 3.434942  | -2.410734 | H                                  | 0.138247  | 3.43527   | -2.410845 |
| H                                  | -1.551362 | 3.416203  | -1.888371 | H                                  | -1.551909 | 3.416181  | -1.888347 |
| H                                  | -0.506627 | 4.782325  | -1.455896 | H                                  | -0.507384 | 4.782457  | -1.455835 |
| H                                  | 1.714202  | 2.99745   | 0.976635  | H                                  | 1.713982  | 2.997736  | 0.976327  |
| H                                  | 2.04023   | 3.322649  | -0.743855 | H                                  | 2.039792  | 3.323066  | -0.744184 |
| H                                  | 1.282306  | 4.560219  | 0.267241  | H                                  | 1.281815  | 4.560482  | 0.267056  |
| H                                  | -7.451719 | -2.181271 | -0.110768 | H                                  | -7.451554 | -2.1814   | -0.110363 |
| H                                  | -5.886991 | -2.35257  | -0.932585 | H                                  | -5.886911 | -2.352511 | -0.932382 |
| H                                  | -6.290479 | -3.407984 | 0.447302  | H                                  | -6.290203 | -3.408155 | 0.447389  |
| H                                  | 3.746911  | -2.17647  | -1.711218 | H                                  | 3.747174  | -2.175791 | -1.71164  |
| H                                  | 3.42419   | -0.452015 | -1.810461 | H                                  | 3.424282  | -0.451321 | -1.810372 |
| H                                  | 3.004721  | -0.868058 | 0.888961  | H                                  | 3.004684  | -0.868087 | 0.88884   |
| H                                  | 6.760026  | 0.62138   | -0.565381 | H                                  | 6.760202  | 0.621635  | -0.564716 |
| H                                  | 6.578492  | -1.141679 | -0.453868 | H                                  | 6.578564  | -1.141432 | -0.45374  |
| H                                  | 5.721388  | -0.233589 | -1.720039 | H                                  | 5.721635  | -0.232943 | -1.719736 |
| H                                  | 6.048352  | -0.567051 | 2.010587  | H                                  | 6.048152  | -0.567506 | 2.010893  |
| H                                  | 4.476529  | 0.192738  | 2.396508  | H                                  | 4.476411  | 0.192464  | 2.396795  |
| H                                  | 6.196383  | 1.739077  | 2.647395  | H                                  | 6.196113  | 1.738639  | 2.648274  |
| H                                  | 4.597012  | 1.933172  | 0.234463  | H                                  | 4.597186  | 1.933242  | 0.235108  |
| Free Energy = -1857.583436 Hartree |           |           |           | Free Energy = -1857.583436 Hartree |           |           |           |

**Table S22.** The Cartesian coordinates of the lowest energy conformers (Conf. 1-8) for isomer 3c.

| conf. 3c-1 | X axis(Å) | Y axis(Å) | Z axis(Å) | conf. 3c-2 | X axis(Å) | Y axis(Å) | Z axis(Å) |
|------------|-----------|-----------|-----------|------------|-----------|-----------|-----------|
| C          | 0.418002  | -2.863617 | -1.943344 | C          | 0.14415   | -2.873839 | -1.89545  |
| C          | -0.982767 | -2.744858 | -1.820351 | C          | -1.249871 | -2.679356 | -1.80182  |
| C          | -1.58428  | -1.559704 | -1.400925 | C          | -1.790773 | -1.472181 | -1.362767 |
| C          | -0.715572 | -0.497466 | -1.087868 | C          | -0.870246 | -0.472751 | -1.000166 |
| C          | 0.694819  | -0.594121 | -1.184644 | C          | 0.535629  | -0.647394 | -1.056646 |
| C          | 1.2614    | -1.800958 | -1.640346 | C          | 1.040182  | -1.872068 | -1.539277 |
| N          | -1.011996 | 0.792861  | -0.697759 | N          | -1.111632 | 0.825123  | -0.588422 |
| C          | 0.147243  | 1.530138  | -0.548001 | C          | 0.079445  | 1.488079  | -0.379775 |
| C          | 1.238768  | 0.70553   | -0.831136 | C          | 1.134624  | 0.610414  | -0.648454 |
| C          | 2.658976  | 1.051778  | -0.816652 | C          | 2.549097  | 0.946283  | -0.571935 |
| C          | 3.657004  | 0.341837  | -0.242117 | C          | 3.559963  | 0.181185  | -0.095923 |
| C          | 5.062444  | 0.834648  | -0.350767 | C          | 4.953162  | 0.715076  | -0.112133 |
| N          | 6.005987  | 0.060857  | 0.268446  | N          | 5.911022  | -0.13521  | 0.374542  |
| C          | 5.845792  | -1.311271 | 0.749021  | C          | 5.773594  | -1.578399 | 0.569577  |
| C          | 4.387864  | -1.626832 | 1.092042  | C          | 4.330637  | -1.958621 | 0.912237  |
| N          | 3.442017  | -0.806885 | 0.543154  | N          | 3.367283  | -1.071551 | 0.521105  |
| C          | 0.027481  | 2.958968  | -0.020224 | C          | 0.114175  | 2.94801   | 0.070892  |
| C          | -1.158075 | 3.624754  | -0.71128  | C          | 0.743478  | 3.766387  | -1.053898 |
| C          | -2.228573 | 4.179536  | -0.135308 | C          | 1.824444  | 4.547863  | -0.983065 |
| C          | 1.270289  | 3.8205    | -0.351157 | C          | 0.881735  | 3.071134  | 1.405884  |
| C          | -0.13858  | 2.905469  | 1.517729  | C          | -1.316878 | 3.500634  | 0.28736   |
| C          | 6.764006  | -1.57206  | 1.945849  | C          | 6.746788  | -2.069082 | 1.643109  |
| C          | -3.080733 | -1.382987 | -1.298032 | C          | -3.27571  | -1.204141 | -1.296871 |
| C          | -3.59125  | -1.319921 | 0.161296  | C          | -3.826368 | -1.143325 | 0.147273  |
| C          | -4.678471 | -0.247    | 0.399922  | C          | -4.86363  | -0.020537 | 0.377642  |
| C          | -5.924627 | -0.412516 | -0.477271 | C          | -6.078866 | -0.089814 | -0.553947 |
| C          | -5.056854 | -0.16893  | 1.891017  | C          | -5.300437 | 0.032544  | 1.854206  |
| O          | -5.723099 | 1.090092  | 2.067408  | O          | -5.897966 | 1.323631  | 2.044603  |
| H          | -2.76103  | -1.096215 | 0.834116  | H          | -3.007449 | -0.978111 | 0.850347  |
| O          | -3.991848 | 0.978055  | 0.058604  | O          | -4.102015 | 1.180522  | 0.108164  |
| O          | 4.0893    | -2.594529 | 1.782888  | O          | 4.056265  | -3.020165 | 1.461353  |
| O          | 5.357867  | 1.886965  | -0.916881 | O          | 5.230354  | 1.853937  | -0.488603 |
| H          | 0.840753  | -3.803483 | -2.288121 | H          | 0.522002  | -3.824981 | -2.260793 |
| H          | -1.613211 | -3.595255 | -2.069339 | H          | -1.921584 | -3.48351  | -2.09273  |
| H          | 2.335812  | -1.898735 | -1.764338 | H          | 2.108496  | -2.031797 | -1.646781 |
| H          | -1.947816 | 1.138324  | -0.496345 | H          | -2.035268 | 1.193967  | -0.381605 |
| H          | 2.992512  | 1.958349  | -1.309311 | H          | 2.855752  | 1.935553  | -0.89955  |
| H          | 6.954119  | 0.403392  | 0.152947  | H          | 6.853559  | 0.235518  | 0.313269  |
| H          | 6.113826  | -2.018879 | -0.054504 | H          | 6.000555  | -2.106252 | -0.373459 |
| H          | 2.48061   | -1.077698 | 0.731423  | H          | 2.413583  | -1.365521 | 0.712126  |



|                                    |           |           |           |                                    |           |           |           |
|------------------------------------|-----------|-----------|-----------|------------------------------------|-----------|-----------|-----------|
| H                                  | -1.075308 | 3.657261  | -1.799162 | H                                  | 0.215402  | 3.685293  | -2.005703 |
| H                                  | -2.378596 | 4.190073  | 0.94124   | H                                  | 2.411109  | 4.663521  | -0.07599  |
| H                                  | -2.997955 | 4.658906  | -0.735561 | H                                  | 2.173824  | 5.094353  | -1.855215 |
| H                                  | 2.16499   | 3.453715  | 0.159248  | H                                  | 0.388519  | 2.469038  | 2.177196  |
| H                                  | 1.09009   | 4.848335  | -0.018516 | H                                  | 0.893809  | 4.113558  | 1.745055  |
| H                                  | 1.471124  | 3.845841  | -1.427886 | H                                  | 1.914904  | 2.724637  | 1.320817  |
| H                                  | -0.217946 | 3.916316  | 1.934845  | H                                  | -1.253022 | 4.546393  | 0.604301  |
| H                                  | 0.733484  | 2.420596  | 1.968303  | H                                  | -1.848241 | 2.943684  | 1.068737  |
| H                                  | -1.029397 | 2.339819  | 1.81196   | H                                  | -1.913959 | 3.471262  | -0.631597 |
| H                                  | 6.63869   | -2.600646 | 2.291344  | H                                  | 6.634049  | -3.146634 | 1.781337  |
| H                                  | 6.525769  | -0.892289 | 2.770641  | H                                  | 6.550899  | -1.570984 | 2.598389  |
| H                                  | 7.81181   | -1.422276 | 1.659571  | H                                  | 7.780196  | -1.858997 | 1.342553  |
| H                                  | -3.596095 | -2.184542 | -1.834401 | H                                  | -3.824437 | -1.957642 | -1.868644 |
| H                                  | -3.361906 | -0.44317  | -1.788378 | H                                  | -3.482402 | -0.236848 | -1.77129  |
| Cl                                 | -4.169413 | -2.970153 | 0.712877  | Cl                                 | -4.508514 | -2.771189 | 0.642938  |
| H                                  | -6.640979 | 0.384756  | -0.255987 | H                                  | -6.762878 | 0.73504   | -0.331573 |
| H                                  | -5.662197 | -0.353278 | -1.537262 | H                                  | -5.770825 | -0.007426 | -1.599967 |
| H                                  | -6.41065  | -1.375681 | -0.289448 | H                                  | -6.619408 | -1.03273  | -0.420406 |
| H                                  | -4.148258 | -0.208561 | 2.507222  | H                                  | -4.423739 | -0.081814 | 2.506107  |
| H                                  | -5.715417 | -0.999445 | 2.166016  | H                                  | -6.018503 | -0.764486 | 2.072826  |
| H                                  | -5.919491 | 1.225975  | 3.005852  | H                                  | -6.110714 | 1.450485  | 2.980752  |
| H                                  | -4.472957 | 1.703102  | 0.49718   | H                                  | -4.569251 | 1.907101  | 0.560513  |
| Free Energy = -1857.584631 Hartree |           |           |           | Free Energy = -1857.584271 Hartree |           |           |           |

| conf. 3c-3 | X axis(Å) | Y axis(Å) | Z axis(Å) | conf. 3c-4 | X axis(Å) | Y axis(Å) | Z axis(Å) |
|------------|-----------|-----------|-----------|------------|-----------|-----------|-----------|
| C          | 0.379528  | -2.889734 | -1.846546 | C          | -0.273647 | -3.255899 | -0.530613 |
| C          | -1.021356 | -2.752585 | -1.755368 | C          | 1.062569  | -3.151307 | -0.090471 |
| C          | -1.615266 | -1.559943 | -1.345725 | C          | 1.618173  | -1.926604 | 0.275606  |
| C          | -0.739917 | -0.510487 | -1.010516 | C          | 0.768751  | -0.808454 | 0.194192  |
| C          | 0.671962  | -0.62773  | -1.067713 | C          | -0.588549 | -0.887576 | -0.207768 |
| C          | 1.230603  | -1.840759 | -1.518035 | C          | -1.101757 | -2.141167 | -0.598273 |
| N          | -1.030809 | 0.785796  | -0.627605 | N          | 1.049628  | 0.521691  | 0.446782  |
| C          | 0.132681  | 1.501805  | -0.438527 | C          | -0.067114 | 1.297176  | 0.213612  |
| C          | 1.221231  | 0.663138  | -0.69478  | C          | -1.119103 | 0.462482  | -0.175603 |
| C          | 2.629619  | 1.039606  | -0.677006 | C          | -2.466473 | 0.901599  | -0.512567 |
| C          | 3.667219  | 0.332473  | -0.172205 | C          | -3.637572 | 0.31332   | -0.172588 |
| C          | 5.048053  | 0.889696  | -0.272129 | C          | -4.921124 | 0.921219  | -0.632081 |
| N          | 6.035831  | 0.109463  | 0.264903  | N          | -6.058315 | 0.267899  | -0.239999 |
| C          | 5.938471  | -1.30406  | 0.62856   | C          | -6.15489  | -1.073333 | 0.332565  |
| C          | 4.505622  | -1.693841 | 1.001094  | C          | -4.856795 | -1.500178 | 1.01357   |
| N          | 3.514825  | -0.871801 | 0.541374  | N          | -3.72929  | -0.805167 | 0.680119  |
| C          | 0.078603  | 2.98271   | -0.060799 | C          | -0.04655  | 2.812722  | 0.408127  |

|    |           |           |           |    |           |           |           |
|----|-----------|-----------|-----------|----|-----------|-----------|-----------|
| C  | -1.289331 | 3.315706  | 0.521133  | C  | -0.3216   | 3.463444  | -0.945217 |
| C  | -2.186223 | 4.184171  | 0.045378  | C  | -1.301421 | 4.317495  | -1.253427 |
| C  | 0.396233  | 3.830005  | -1.315065 | C  | 1.350245  | 3.29963   | 0.868695  |
| C  | 1.107009  | 3.307742  | 1.057257  | C  | -1.074614 | 3.215622  | 1.48857   |
| C  | 6.913552  | -1.63503  | 1.760906  | C  | -6.579534 | -2.128448 | -0.707154 |
| C  | -3.111407 | -1.364319 | -1.281551 | C  | 3.047355  | -1.772635 | 0.740117  |
| C  | -3.662204 | -1.315734 | 0.163054  | C  | 3.960702  | -1.082779 | -0.300786 |
| C  | -4.74936  | -0.238986 | 0.38181   | C  | 4.95112   | -0.065315 | 0.310217  |
| C  | -5.968771 | -0.384451 | -0.535808 | C  | 5.872721  | -0.655445 | 1.383446  |
| C  | -5.173984 | -0.177167 | 1.861229  | C  | 5.764531  | 0.64332   | -0.789746 |
| O  | -5.832238 | 1.086647  | 2.034095  | O  | 6.312077  | 1.822031  | -0.180435 |
| H  | -2.850404 | -1.104335 | 0.861927  | H  | 3.351818  | -0.546139 | -1.031129 |
| O  | -4.043339 | 0.984441  | 0.077763  | O  | 4.072904  | 0.921618  | 0.901876  |
| O  | 4.263329  | -2.714335 | 1.6357    | O  | -4.839065 | -2.445357 | 1.7953    |
| O  | 5.288137  | 1.994235  | -0.76051  | O  | -4.969378 | 1.962304  | -1.287955 |
| H  | 0.797738  | -3.832942 | -2.187748 | H  | -0.659948 | -4.22904  | -0.821589 |
| H  | -1.657934 | -3.592246 | -2.024125 | H  | 1.679815  | -4.045251 | -0.042085 |
| H  | 2.305231  | -1.954722 | -1.62207  | H  | -2.122199 | -2.238447 | -0.955844 |
| H  | -1.966606 | 1.139264  | -0.441933 | H  | 1.966587  | 0.870093  | 0.710831  |
| H  | 2.921459  | 1.996701  | -1.09952  | H  | -2.577561 | 1.822854  | -1.077013 |
| H  | 6.967301  | 0.496349  | 0.15413   | H  | -6.911525 | 0.688245  | -0.593096 |
| H  | 6.193712  | -1.930554 | -0.243791 | H  | -6.905827 | -1.048909 | 1.130737  |
| H  | 2.570336  | -1.17999  | 0.755625  | H  | -2.877733 | -1.130422 | 1.12946   |
| H  | -1.51683  | 2.795558  | 1.454025  | H  | 0.392227  | 3.182625  | -1.721992 |
| H  | -2.036442 | 4.743848  | -0.873716 | H  | -2.058745 | 4.629723  | -0.540038 |
| H  | -3.115697 | 4.373464  | 0.577224  | H  | -1.388468 | 4.725699  | -2.257015 |
| H  | 1.39391   | 3.593853  | -1.696209 | H  | 1.636452  | 2.849971  | 1.827276  |
| H  | 0.374018  | 4.899152  | -1.0739   | H  | 1.325185  | 4.385812  | 1.001353  |
| H  | -0.322117 | 3.638433  | -2.11941  | H  | 2.128662  | 3.075341  | 0.130165  |
| H  | 1.018598  | 4.363027  | 1.339069  | H  | -1.056577 | 4.300024  | 1.648536  |
| H  | 2.134041  | 3.125832  | 0.732569  | H  | -0.828444 | 2.727802  | 2.438246  |
| H  | 0.922738  | 2.697938  | 1.94912   | H  | -2.092067 | 2.923708  | 1.215574  |
| H  | 6.833746  | -2.692807 | 2.021166  | H  | -6.671146 | -3.108061 | -0.22827  |
| H  | 6.689947  | -1.036581 | 2.650253  | H  | -5.846365 | -2.194201 | -1.518808 |
| H  | 7.943395  | -1.426649 | 1.447388  | H  | -7.549143 | -1.859404 | -1.141908 |
| H  | -3.621824 | -2.151209 | -1.843773 | H  | 3.466177  | -2.746381 | 1.008807  |
| H  | -3.366921 | -0.413957 | -1.76545  | H  | 3.062428  | -1.161848 | 1.651068  |
| Cl | -4.265645 | -2.96858  | 0.678399  | Cl | 4.84937   | -2.332796 | -1.305229 |
| H  | -6.687141 | 0.413987  | -0.325295 | H  | 6.542593  | 0.121909  | 1.76389   |
| H  | -5.673486 | -0.311556 | -1.586261 | H  | 5.290136  | -1.04621  | 2.222276  |
| H  | -6.465951 | -1.347151 | -0.376925 | H  | 6.482526  | -1.46652  | 0.971972  |
| H  | -4.286315 | -0.23549  | 2.505789  | H  | 5.103197  | 0.917095  | -1.622968 |
| H  | -5.849796 | -1.004084 | 2.103239  | H  | 6.561815  | -0.008526 | -1.161391 |

|                                    |           |          |          |                                    |          |          |          |
|------------------------------------|-----------|----------|----------|------------------------------------|----------|----------|----------|
| H                                  | -6.060425 | 1.210224 | 2.967041 | H                                  | 6.758729 | 2.359155 | -0.85106 |
| H                                  | -4.533746 | 1.707036 | 0.509806 | H                                  | 4.599102 | 1.737786 | 0.98978  |
| Free Energy = -1857.584111 Hartree |           |          |          | Free Energy = -1857.583989 Hartree |          |          |          |

| conf. 3c-5 | X axis(Å) | Y axis(Å) | Z axis(Å) | conf. 3c-6 | X axis(Å) | Y axis(Å) | Z axis(Å) |
|------------|-----------|-----------|-----------|------------|-----------|-----------|-----------|
| C          | -0.417975 | -3.261391 | -0.625774 | C          | 0.125147  | -2.997244 | -1.730132 |
| C          | 0.8911    | -3.166555 | -0.107883 | C          | -1.268408 | -2.797488 | -1.640964 |
| C          | 1.46109   | -1.940236 | 0.230506  | C          | -1.807613 | -1.560877 | -1.290614 |
| C          | 0.652333  | -0.803609 | 0.040712  | C          | -0.885551 | -0.535923 | -1.0129   |
| C          | -0.676639 | -0.873548 | -0.446552 | C          | 0.519936  | -0.71384  | -1.063409 |
| C          | -1.205862 | -2.129878 | -0.803059 | C          | 1.022517  | -1.971123 | -1.45575  |
| N          | 0.940225  | 0.529804  | 0.253876  | N          | -1.125643 | 0.790044  | -0.702383 |
| C          | -0.14509  | 1.317047  | -0.087088 | C          | 0.066618  | 1.467521  | -0.552854 |
| C          | -1.182734 | 0.485167  | -0.510317 | C          | 1.120319  | 0.571677  | -0.754204 |
| C          | -2.529084 | 0.861422  | -0.945793 | C          | 2.536847  | 0.907005  | -0.716283 |
| C          | -3.692342 | 0.333699  | -0.501908 | C          | 3.552613  | 0.174717  | -0.202252 |
| C          | -4.980125 | 0.792677  | -1.103131 | C          | 4.94653   | 0.698136  | -0.292196 |
| N          | -6.112342 | 0.24255   | -0.568741 | N          | 5.91075   | -0.105414 | 0.257505  |
| C          | -6.238039 | -0.528728 | 0.666621  | C          | 5.776131  | -1.522653 | 0.593766  |
| C          | -4.898419 | -1.09356  | 1.14129   | C          | 4.335117  | -1.87323  | 0.973452  |
| N          | -3.771501 | -0.625092 | 0.526143  | N          | 3.367443  | -1.025223 | 0.513247  |
| C          | -0.064226 | 2.818853  | 0.180605  | C          | 0.097839  | 2.964589  | -0.24978  |
| C          | 1.303527  | 3.320305  | -0.269279 | C          | 1.02923   | 3.216903  | 0.93084   |
| C          | 2.220706  | 3.952702  | 0.468646  | C          | 2.053519  | 4.070966  | 0.988878  |
| C          | -0.317429 | 3.06387   | 1.687931  | C          | -1.304094 | 3.47567   | 0.173054  |
| C          | -1.112007 | 3.619094  | -0.630442 | C          | 0.520373  | 3.730897  | -1.526286 |
| C          | -7.275853 | -1.645647 | 0.505438  | C          | 6.751421  | -1.904198 | 1.709279  |
| C          | 2.861705  | -1.807802 | 0.78048   | C          | -3.292299 | -1.290136 | -1.229456 |
| C          | 3.86811   | -1.226731 | -0.240892 | C          | -3.824921 | -1.122847 | 0.21307   |
| C          | 4.838719  | -0.184778 | 0.361285  | C          | -4.860565 | 0.013123  | 0.374412  |
| C          | 5.690634  | -0.71675  | 1.518927  | C          | -6.089903 | -0.126426 | -0.530363 |
| C          | 5.721299  | 0.438683  | -0.736771 | C          | -5.273944 | 0.17589   | 1.849628  |
| O          | 6.2489    | 1.653886  | -0.184109 | O          | -5.873583 | 1.475945  | 1.952287  |
| H          | 3.328172  | -0.73718  | -1.053659 | H          | -2.996716 | -0.905819 | 0.890779  |
| O          | 3.941842  | 0.842135  | 0.839299  | O          | -4.106161 | 1.191471  | 0.003728  |
| O          | -4.848553 | -1.902144 | 2.061573  | O          | 4.065904  | -2.884356 | 1.61309   |
| O          | -5.029462 | 1.591446  | -2.038437 | O          | 5.221367  | 1.792222  | -0.785301 |
| H          | -0.813708 | -4.238729 | -0.888608 | H          | 0.501659  | -3.972668 | -2.026278 |
| H          | 1.476839  | -4.072756 | 0.027684  | H          | -1.941148 | -3.622046 | -1.86469  |
| H          | -2.206793 | -2.214461 | -1.216852 | H          | 2.090185  | -2.137935 | -1.558314 |
| H          | 1.851656  | 0.887452  | 0.532576  | H          | -2.047871 | 1.1697    | -0.508946 |
| H          | -2.652137 | 1.616722  | -1.714636 | H          | 2.853308  | 1.866107  | -1.111455 |

|                                    |           |           |           |                                   |           |           |           |
|------------------------------------|-----------|-----------|-----------|-----------------------------------|-----------|-----------|-----------|
| H                                  | -6.969271 | 0.592798  | -0.984332 | H                                 | 6.852625  | 0.25418   | 0.142678  |
| H                                  | -6.570229 | 0.136322  | 1.480969  | H                                 | 6.004017  | -2.139851 | -0.293108 |
| H                                  | -2.900232 | -0.98896  | 0.902924  | H                                 | 2.416163  | -1.301625 | 0.73926   |
| H                                  | 1.508881  | 3.155401  | -1.328838 | H                                 | 0.780547  | 2.635543  | 1.820453  |
| H                                  | 2.087462  | 4.155136  | 1.528034  | H                                 | 2.375102  | 4.667816  | 0.13982   |
| H                                  | 3.14809   | 4.304525  | 0.022684  | H                                 | 2.633716  | 4.181883  | 1.90108   |
| H                                  | -1.308123 | 2.687248  | 1.962105  | H                                 | -2.039611 | 3.352923  | -0.631278 |
| H                                  | -0.286102 | 4.13547   | 1.917977  | H                                 | -1.241283 | 4.543374  | 0.405154  |
| H                                  | 0.421414  | 2.553177  | 2.314642  | H                                 | -1.673436 | 2.960265  | 1.067182  |
| H                                  | -0.959334 | 4.689085  | -0.452933 | H                                 | 0.508181  | 4.812507  | -1.348142 |
| H                                  | -2.132293 | 3.36864   | -0.327584 | H                                 | -0.179869 | 3.514031  | -2.340261 |
| H                                  | -1.016869 | 3.438339  | -1.706866 | H                                 | 1.52273   | 3.452718  | -1.863809 |
| H                                  | -7.370398 | -2.200269 | 1.441935  | H                                 | 6.642455  | -2.96381  | 1.950831  |
| H                                  | -6.977422 | -2.338006 | -0.288848 | H                                 | 6.554318  | -1.316563 | 2.611985  |
| H                                  | -8.252952 | -1.219953 | 0.24797   | H                                 | 7.784018  | -1.720634 | 1.389254  |
| H                                  | 3.219837  | -2.775935 | 1.141297  | H                                 | -3.846124 | -2.084943 | -1.736625 |
| H                                  | 2.841803  | -1.135293 | 1.646287  | H                                 | -3.50626  | -0.361161 | -1.772366 |
| Cl                                 | 4.790741  | -2.573336 | -1.078014 | Cl                                | -4.497562 | -2.71023  | 0.837018  |
| H                                  | 6.342285  | 0.078939  | 1.893025  | H                                 | -6.774713 | 0.709217  | -0.355649 |
| H                                  | 5.055892  | -1.055005 | 2.342855  | H                                 | -5.798446 | -0.11581  | -1.58435  |
| H                                  | 6.316736  | -1.55361  | 1.192091  | H                                 | -6.623903 | -1.059804 | -0.323387 |
| H                                  | 5.111468  | 0.658171  | -1.623765 | H                                 | -4.38634  | 0.113543  | 2.493839  |
| H                                  | 6.5297    | -0.245091 | -1.016003 | H                                 | -5.984672 | -0.604946 | 2.139147  |
| H                                  | 6.751437  | 2.128264  | -0.862498 | H                                 | -6.066115 | 1.67457   | 2.880324  |
| H                                  | 4.444693  | 1.677028  | 0.849724  | H                                 | -4.56318  | 1.948394  | 0.414938  |
| Free Energy = -1857.583674 Hartree |           |           |           | Free Energy = -1857.58364 Hartree |           |           |           |

| conf. 3c-7 | X axis(Å) | Y axis(Å) | Z axis(Å) | conf. 3c-8 | X axis(Å) | Y axis(Å) | Z axis(Å) |
|------------|-----------|-----------|-----------|------------|-----------|-----------|-----------|
| C          | -0.496913 | -3.242984 | -0.292046 | C          | -0.177639 | -3.293502 | -0.521424 |
| C          | 0.843269  | -3.157356 | 0.13943   | C          | 1.142758  | -3.154257 | -0.044234 |
| C          | 1.447374  | -1.93135  | 0.413055  | C          | 1.671954  | -1.90911  | 0.290605  |
| C          | 0.641687  | -0.789384 | 0.249527  | C          | 0.812144  | -0.806267 | 0.140033  |
| C          | -0.718445 | -0.847068 | -0.146712 | C          | -0.530712 | -0.919123 | -0.299968 |
| C          | -1.280892 | -2.104926 | -0.444041 | C          | -1.016657 | -2.193184 | -0.65819  |
| N          | 0.968192  | 0.544134  | 0.412043  | N          | 1.067582  | 0.536059  | 0.349103  |
| C          | -0.121219 | 1.341     | 0.129782  | C          | -0.052912 | 1.286318  | 0.05363   |
| C          | -1.200995 | 0.520514  | -0.210195 | C          | -1.079919 | 0.423278  | -0.33327  |
| C          | -2.526387 | 0.962758  | -0.626957 | C          | -2.425066 | 0.8167    | -0.737951 |
| C          | -3.724255 | 0.441933  | -0.272922 | C          | -3.59301  | 0.231088  | -0.388063 |
| C          | -4.971494 | 1.031828  | -0.843423 | C          | -4.868525 | 0.749888  | -0.961167 |
| N          | -6.140597 | 0.452744  | -0.433358 | N          | -6.009075 | 0.124778  | -0.539166 |
| C          | -6.300245 | -0.811659 | 0.28247   | C          | -6.162923 | -0.884138 | 0.506155  |

|    |           |           |           |    |           |           |           |
|----|-----------|-----------|-----------|----|-----------|-----------|-----------|
| C  | -5.037196 | -1.205511 | 1.044869  | C  | -4.82437  | -1.403588 | 1.029194  |
| N  | -3.877523 | -0.579627 | 0.683872  | N  | -3.688464 | -0.829815 | 0.533939  |
| C  | -0.006476 | 2.864202  | 0.202956  | C  | -0.041476 | 2.81031   | 0.154455  |
| C  | 1.21468   | 3.248796  | 1.028288  | C  | -1.250099 | 3.264844  | 0.965188  |
| C  | 2.255063  | 3.994116  | 0.644281  | C  | -2.168177 | 4.168977  | 0.616019  |
| C  | -1.227582 | 3.472244  | 0.94861   | C  | -0.012636 | 3.413321  | -1.270074 |
| C  | 0.056537  | 3.43768   | -1.231748 | C  | 1.214685  | 3.307906  | 0.916139  |
| C  | -6.737248 | -1.960408 | -0.647149 | C  | -7.043071 | -2.046649 | 0.024308  |
| C  | 2.88745   | -1.801608 | 0.850146  | C  | 3.084068  | -1.715943 | 0.790294  |
| C  | 3.81575   | -1.275921 | -0.270779 | C  | 4.015434  | -1.046522 | -0.247438 |
| C  | 4.849869  | -0.231349 | 0.208945  | C  | 4.988113  | -0.010639 | 0.360739  |
| C  | 5.786354  | -0.735396 | 1.312171  | C  | 5.886668  | -0.572406 | 1.468125  |
| C  | 5.646447  | 0.334742  | -0.98183  | C  | 5.82433   | 0.674532  | -0.736746 |
| O  | 6.238323  | 1.558652  | -0.521313 | O  | 6.35758   | 1.867099  | -0.141963 |
| H  | 3.218418  | -0.804405 | -1.05337  | H  | 3.419726  | -0.529542 | -1.002398 |
| O  | 4.011886  | 0.82981   | 0.719338  | O  | 4.092701  | 0.986581  | 0.907834  |
| O  | -5.073877 | -2.06817  | 1.915629  | O  | -4.789852 | -2.288089 | 1.87877   |
| O  | -4.961494 | 1.999404  | -1.605453 | O  | -4.905239 | 1.667692  | -1.781615 |
| H  | -0.921501 | -4.219436 | -0.509312 | H  | -0.54207  | -4.281883 | -0.788203 |
| H  | 1.425861  | -4.068421 | 0.253673  | H  | 1.769276  | -4.037271 | 0.057197  |
| H  | -2.305079 | -2.189296 | -0.794063 | H  | -2.022809 | -2.316954 | -1.047744 |
| H  | 1.903623  | 0.888845  | 0.618204  | H  | 1.965814  | 0.906437  | 0.644034  |
| H  | -2.606235 | 1.813836  | -1.296988 | H  | -2.546784 | 1.679897  | -1.383749 |
| H  | -6.96816  | 0.857863  | -0.858089 | H  | -6.856793 | 0.507366  | -0.944459 |
| H  | -7.069986 | -0.672826 | 1.050632  | H  | -6.64835  | -0.425171 | 1.381602  |
| H  | -3.050379 | -0.884152 | 1.189953  | H  | -2.827312 | -1.176316 | 0.947882  |
| H  | 1.184363  | 2.896127  | 2.061192  | H  | -1.319964 | 2.799599  | 1.949852  |
| H  | 2.357937  | 4.389086  | -0.36281  | H  | -2.176599 | 4.66053   | -0.352906 |
| H  | 3.046081  | 4.247995  | 1.346095  | H  | -2.97362  | 4.433761  | 1.295952  |
| H  | -2.165678 | 3.268564  | 0.42719   | H  | 0.868749  | 3.052356  | -1.811488 |
| H  | -1.105111 | 4.558609  | 1.023461  | H  | 0.04206   | 4.507363  | -1.22528  |
| H  | -1.310007 | 3.065556  | 1.962826  | H  | -0.898057 | 3.140132  | -1.851267 |
| H  | 0.112621  | 4.532204  | -1.208137 | H  | 1.174619  | 4.398303  | 1.001401  |
| H  | -0.838667 | 3.162261  | -1.796736 | H  | 2.139129  | 3.049414  | 0.385656  |
| H  | 0.926296  | 3.056082  | -1.777926 | H  | 1.266699  | 2.895137  | 1.930332  |
| H  | -6.87758  | -2.877018 | -0.066394 | H  | -7.16787  | -2.775213 | 0.829353  |
| H  | -5.986194 | -2.140847 | -1.424308 | H  | -6.588566 | -2.543189 | -0.839754 |
| H  | -7.684449 | -1.708009 | -1.137644 | H  | -8.031665 | -1.674942 | -0.269981 |
| H  | 3.260514  | -2.761198 | 1.218729  | H  | 3.510558  | -2.672368 | 1.105354  |
| H  | 2.946174  | -1.096949 | 1.688174  | H  | 3.062514  | -1.072574 | 1.678479  |
| Cl | 4.642403  | -2.66951  | -1.130136 | Cl | 4.92939   | -2.316009 | -1.203311 |
| H  | 6.474965  | 0.063347  | 1.604349  | H  | 6.546987  | 0.21502   | 1.84451   |
| H  | 5.216157  | -1.03655  | 2.195535  | H  | 5.286493  | -0.944698 | 2.302967  |

|                                    |          |           |           |                                    |          |           |           |
|------------------------------------|----------|-----------|-----------|------------------------------------|----------|-----------|-----------|
| H                                  | 6.374511 | -1.591669 | 0.965942  | H                                  | 6.506567 | -1.391712 | 1.089139  |
| H                                  | 4.966804 | 0.533571  | -1.821699 | H                                  | 5.180694 | 0.92875   | -1.589816 |
| H                                  | 6.417177 | -0.374044 | -1.302374 | H                                  | 6.630089 | 0.015834  | -1.076868 |
| H                                  | 6.669736 | 2.010034  | -1.26155  | H                                  | 6.823527 | 2.386767  | -0.813183 |
| H                                  | 4.526933 | 1.654815  | 0.653882  | H                                  | 4.617741 | 1.802906  | 1.000183  |
| Free Energy = -1857.583553 Hartree |          |           |           | Free Energy = -1857.583352 Hartree |          |           |           |

**Table S23.** The Cartesian coordinates of the lowest energy conformers (Conf. 1-8) for isomer 3d.

| conf. 3d-1 | X axis(Å) | Y axis(Å) | Z axis(Å) | conf. 3d-2 | X axis(Å) | Y axis(Å) | Z axis(Å) |
|------------|-----------|-----------|-----------|------------|-----------|-----------|-----------|
| C          | 0.063467  | -2.695183 | 1.951554  | C          | 0.063246  | -2.695327 | 1.951411  |
| C          | 1.442754  | -2.452991 | 1.799537  | C          | 1.442552  | -2.453253 | 1.799419  |
| C          | 1.928408  | -1.252771 | 1.281576  | C          | 1.928293  | -1.253122 | 1.281322  |
| C          | 0.964861  | -0.299689 | 0.898432  | C          | 0.964812  | -0.300014 | 0.898072  |
| C          | -0.431063 | -0.529042 | 1.01916   | C          | -0.431107 | -0.52923  | 1.018838  |
| C          | -0.876699 | -1.743028 | 1.577537  | C          | -0.876847 | -1.743143 | 1.577269  |
| N          | 1.127847  | 0.989562  | 0.414381  | N          | 1.127949  | 0.989156  | 0.413833  |
| C          | -0.104554 | 1.587581  | 0.225743  | C          | -0.104387 | 1.587316  | 0.225228  |
| C          | -1.103029 | 0.677437  | 0.577832  | C          | -1.102949 | 0.67731   | 0.577432  |
| C          | -2.535414 | 0.94091   | 0.550387  | C          | -2.535309 | 0.940967  | 0.550384  |
| C          | -3.524887 | 0.111241  | 0.143483  | C          | -3.524897 | 0.111353  | 0.14364   |
| C          | -4.941681 | 0.577662  | 0.203272  | C          | -4.941664 | 0.577839  | 0.20374   |
| N          | -5.875769 | -0.334684 | -0.210749 | N          | -5.875819 | -0.334342 | -0.210496 |
| C          | -5.675644 | -1.775016 | -0.368572 | C          | -5.675702 | -1.774694 | -0.368174 |
| C          | -4.23052  | -2.097875 | -0.757233 | C          | -4.230783 | -2.097353 | -0.757841 |
| N          | -3.296712 | -1.151296 | -0.43971  | N          | -3.296818 | -1.151095 | -0.439752 |
| C          | -0.242909 | 3.0213    | -0.286588 | C          | -0.242666 | 3.021053  | -0.287145 |
| C          | -0.871483 | 3.852641  | 0.829553  | C          | -0.87015  | 3.852578  | 0.829457  |
| C          | -2.001455 | 4.562882  | 0.774927  | C          | -2.000183 | 4.562821  | 0.775937  |
| C          | -1.074791 | 3.037437  | -1.588619 | C          | -1.075449 | 3.037466  | -1.588592 |
| C          | 1.136806  | 3.651278  | -0.594697 | C          | 1.136987  | 3.650641  | -0.596307 |
| C          | -6.664606 | -2.344898 | -1.387401 | C          | -6.66541  | -2.344862 | -1.386056 |
| C          | 3.410424  | -0.974859 | 1.178605  | C          | 3.410323  | -0.975271 | 1.178497  |
| C          | 3.948509  | -0.948254 | -0.261267 | C          | 3.948561  | -0.94845  | -0.261288 |
| C          | 5.303669  | -0.226488 | -0.4695   | C          | 5.303605  | -0.226388 | -0.469231 |
| O          | 5.589697  | -0.172885 | -1.877071 | O          | 5.589717  | -0.172285 | -1.876739 |
| C          | 5.166466  | 1.260247  | -0.086136 | C          | 5.166129  | 1.260179  | -0.085363 |
| O          | 4.014047  | 1.877182  | -0.660394 | O          | 4.013374  | 1.877125  | -0.658992 |
| H          | 3.223172  | -0.479122 | -0.925058 | H          | 3.223257  | -0.479384 | -0.925158 |
| C          | 6.472021  | -0.850686 | 0.299388  | C          | 6.472077  | -0.850581 | 0.299523  |
| O          | -3.926371 | -3.164974 | -1.278693 | O          | -3.926869 | -3.163958 | -1.280419 |
| O          | -5.258234 | 1.714496  | 0.553331  | O          | -5.258122 | 1.714613  | 0.554052  |

|                                    |           |           |           |                                    |           |           |           |
|------------------------------------|-----------|-----------|-----------|------------------------------------|-----------|-----------|-----------|
| H                                  | -0.266026 | -3.639911 | 2.375335  | H                                  | -0.266316 | -3.639987 | 2.375293  |
| H                                  | 2.153668  | -3.217253 | 2.104084  | H                                  | 2.153384  | -3.217546 | 2.10408   |
| H                                  | -1.935347 | -1.930341 | 1.727283  | H                                  | -1.935507 | -1.930374 | 1.727001  |
| H                                  | 2.014611  | 1.40479   | 0.142953  | H                                  | 2.014833  | 1.404365  | 0.142672  |
| H                                  | -2.877448 | 1.924525  | 0.859085  | H                                  | -2.877154 | 1.924583  | 0.85925   |
| H                                  | -6.832124 | -0.007169 | -0.123009 | H                                  | -6.832163 | -0.006823 | -0.122683 |
| H                                  | -5.840378 | -2.283007 | 0.597939  | H                                  | -5.839572 | -2.282492 | 0.598602  |
| H                                  | -2.338525 | -1.406716 | -0.661286 | H                                  | -2.338728 | -1.406257 | -0.662049 |
| H                                  | -0.295894 | 3.851855  | 1.75696   | H                                  | -0.293693 | 3.851841  | 1.756331  |
| H                                  | -2.634832 | 4.59765   | -0.107163 | H                                  | -2.634426 | 4.597618  | -0.105534 |
| H                                  | -2.343994 | 5.130675  | 1.636119  | H                                  | -2.341852 | 5.1306    | 1.637482  |
| H                                  | -0.581374 | 2.428521  | -2.354429 | H                                  | -0.582806 | 2.428338  | -2.354732 |
| H                                  | -1.161273 | 4.060456  | -1.972495 | H                                  | -1.161796 | 4.06053   | -1.972376 |
| H                                  | -2.081873 | 2.639019  | -1.441068 | H                                  | -2.082577 | 2.639434  | -1.440364 |
| H                                  | 0.990292  | 4.680009  | -0.938807 | H                                  | 0.990455  | 4.679313  | -0.940601 |
| H                                  | 1.661519  | 3.104826  | -1.386584 | H                                  | 1.660949  | 3.103809  | -1.388434 |
| H                                  | 1.787812  | 3.688715  | 0.28554   | H                                  | 1.788613  | 3.688146  | 0.28345   |
| H                                  | -6.506396 | -3.420075 | -1.496505 | H                                  | -6.5071   | -3.42002  | -1.495188 |
| H                                  | -6.528863 | -1.869737 | -2.36453  | H                                  | -6.530589 | -1.869809 | -2.363366 |
| H                                  | -7.694605 | -2.172818 | -1.052865 | H                                  | -7.695153 | -2.172934 | -1.050657 |
| H                                  | 3.96875   | -1.7116   | 1.764866  | H                                  | 3.968563  | -1.712121 | 1.764704  |
| H                                  | 3.618119  | 0.003867  | 1.631765  | H                                  | 3.617978  | 0.003367  | 1.631871  |
| Cl                                 | 4.058705  | -2.668176 | -0.914536 | Cl                                 | 4.059103  | -2.668291 | -0.91473  |
| H                                  | 7.38638   | -0.280673 | 0.104353  | H                                  | 7.386335  | -0.280379 | 0.104549  |
| H                                  | 6.639146  | -1.884205 | -0.018212 | H                                  | 6.639361  | -1.884012 | -0.018284 |
| H                                  | 6.28762   | -0.853206 | 1.379907  | H                                  | 6.287722  | -0.853333 | 1.380043  |
| H                                  | 6.079174  | 1.773471  | -0.41478  | H                                  | 6.078608  | 1.773707  | -0.414146 |
| H                                  | 5.073928  | 1.387876  | 0.994124  | H                                  | 5.073919  | 1.387453  | 0.994965  |
| H                                  | 4.110201  | 1.817629  | -1.626396 | H                                  | 4.109736  | 1.819363  | -1.62506  |
| H                                  | 5.534013  | -1.073709 | -2.240678 | H                                  | 5.534482  | -1.073033 | -2.240586 |
| Free Energy = -1857.585463 Hartree |           |           |           | Free Energy = -1857.585461 Hartree |           |           |           |

| conf. 3d-3 | X axis(Å) | Y axis(Å) | Z axis(Å) | conf. 3d-4 | X axis(Å) | Y axis(Å) | Z axis(Å) |
|------------|-----------|-----------|-----------|------------|-----------|-----------|-----------|
| C          | -0.053198 | -3.151325 | -0.496765 | C          | -0.150383 | -2.672384 | 1.949359  |
| C          | 1.274515  | -2.960731 | -0.066092 | C          | 1.23631   | -2.471896 | 1.803909  |
| C          | 1.770511  | -1.699397 | 0.262067  | C          | 1.760966  | -1.279849 | 1.305002  |
| C          | 0.867809  | -0.623442 | 0.154611  | C          | 0.828196  | -0.290293 | 0.94104   |
| C          | -0.487664 | -0.796562 | -0.230218 | C          | -0.574679 | -0.476067 | 1.05508   |
| C          | -0.937303 | -2.08326  | -0.585477 | C          | -1.05999  | -1.685481 | 1.588893  |
| N          | 1.06193   | 0.732335  | 0.3688    | N          | 1.029657  | 1.001845  | 0.486206  |
| C          | -0.110436 | 1.426269  | 0.12961   | C          | -0.179638 | 1.646116  | 0.30958   |
| C          | -1.106232 | 0.514065  | -0.224056 | C          | -1.208076 | 0.761009  | 0.637986  |

|   |           |           |           |   |           |           |           |
|---|-----------|-----------|-----------|---|-----------|-----------|-----------|
| C | -2.487775 | 0.846004  | -0.549883 | C | -2.636816 | 1.051824  | 0.631324  |
| C | -3.60667  | 0.190411  | -0.161534 | C | -3.639947 | 0.258539  | 0.188413  |
| C | -4.939687 | 0.68593   | -0.616854 | C | -5.049235 | 0.741799  | 0.287415  |
| N | -6.018947 | -0.030678 | -0.174918 | N | -6.000273 | -0.126301 | -0.175873 |
| C | -6.007723 | -1.352246 | 0.448966  | C | -5.82659  | -1.553723 | -0.444433 |
| C | -4.669613 | -1.658729 | 1.116889  | C | -4.383731 | -1.881119 | -0.837554 |
| N | -3.602133 | -0.896465 | 0.735538  | N | -3.432732 | -0.97405  | -0.459383 |
| C | -0.2042   | 2.943324  | 0.289118  | C | -0.225779 | 3.110019  | -0.133468 |
| C | -0.593193 | 3.536974  | -1.062388 | C | 1.139048  | 3.525386  | -0.665524 |
| C | -1.64228  | 4.316522  | -1.337157 | C | 1.957216  | 4.457318  | -0.169588 |
| C | 1.163382  | 3.560475  | 0.668927  | C | -0.663941 | 3.984766  | 1.064609  |
| C | -1.21342  | 3.284505  | 1.408613  | C | -1.230279 | 3.293998  | -1.303767 |
| C | -6.374737 | -2.474046 | -0.541865 | C | -6.812035 | -2.021265 | -1.517896 |
| C | 3.194666  | -1.504004 | 0.729043  | C | 3.251014  | -1.054001 | 1.186098  |
| C | 4.108555  | -0.812206 | -0.294747 | C | 3.78612   | -1.139866 | -0.252866 |
| C | 5.402974  | -0.175605 | 0.271722  | C | 5.187963  | -0.525035 | -0.498371 |
| O | 6.063373  | 0.548523  | -0.779352 | O | 5.496248  | -0.613468 | -1.899406 |
| C | 5.040666  | 0.930281  | 1.283413  | C | 5.143112  | 0.996941  | -0.253462 |
| O | 4.039921  | 1.824351  | 0.795763  | O | 4.070656  | 1.632843  | -0.943132 |
| H | 3.562706  | -0.029754 | -0.820298 | H | 3.090271  | -0.661213 | -0.941372 |
| C | 6.360307  | -1.176497 | 0.925789  | C | 6.302173  | -1.155027 | 0.342544  |
| O | -4.568037 | -2.570368 | 1.931274  | O | -4.096412 | -2.922737 | -1.416016 |
| O | -5.074912 | 1.692986  | -1.311923 | O | -5.342668 | 1.859452  | 0.712163  |
| H | -0.387428 | -4.151051 | -0.760351 | H | -0.510327 | -3.613252 | 2.356686  |
| H | 1.938904  | -3.818558 | 0.004703  | H | 1.921492  | -3.264175 | 2.095058  |
| H | -1.954428 | -2.239525 | -0.931081 | H | -2.124609 | -1.842514 | 1.731782  |
| H | 1.94713   | 1.165426  | 0.616586  | H | 1.921594  | 1.411273  | 0.228314  |
| H | -2.675012 | 1.734288  | -1.145964 | H | -2.977948 | 2.014083  | 1.001107  |
| H | -6.906653 | 0.312587  | -0.526411 | H | -6.950558 | 0.212241  | -0.066407 |
| H | -6.743192 | -1.350773 | 1.261769  | H | -6.016528 | -2.131081 | 0.477159  |
| H | -2.720764 | -1.144425 | 1.17652   | H | -2.477759 | -1.237608 | -0.686029 |
| H | 0.099738  | 3.287477  | -1.868116 | H | 1.449965  | 2.996298  | -1.568359 |
| H | -2.384021 | 4.592394  | -0.592823 | H | 1.723489  | 5.033527  | 0.721507  |
| H | -1.80541  | 4.695888  | -2.342513 | H | 2.906872  | 4.67235   | -0.651682 |
| H | 1.545855  | 3.164049  | 1.616344  | H | -1.660003 | 3.698704  | 1.4128    |
| H | 1.047551  | 4.643206  | 0.780051  | H | -0.703318 | 5.040432  | 0.772274  |
| H | 1.919186  | 3.389304  | -0.105581 | H | 0.026299  | 3.88272   | 1.908961  |
| H | -1.275445 | 4.369784  | 1.550296  | H | -1.232905 | 4.342439  | -1.62273  |
| H | -0.887299 | 2.837412  | 2.354271  | H | -2.247431 | 3.021585  | -1.01146  |
| H | -2.215126 | 2.907217  | 1.185819  | H | -0.948425 | 2.675104  | -2.163318 |
| H | -6.385078 | -3.43895  | -0.025919 | H | -6.674659 | -3.088075 | -1.707545 |
| H | -5.655053 | -2.517397 | -1.367014 | H | -6.651784 | -1.474908 | -2.453227 |
| H | -7.369762 | -2.292453 | -0.964314 | H | -7.843107 | -1.852938 | -1.185009 |



|                                    |          |           |           |                                    |          |           |           |
|------------------------------------|----------|-----------|-----------|------------------------------------|----------|-----------|-----------|
| H                                  | 3.627972 | -2.467981 | 1.014168  | H                                  | 3.786817 | -1.768498 | 1.819101  |
| H                                  | 3.186946 | -0.886552 | 1.636925  | H                                  | 3.494094 | -0.054357 | 1.571114  |
| Cl                                 | 4.541103 | -1.993107 | -1.643221 | Cl                                 | 3.785261 | -2.899997 | -0.806812 |
| H                                  | 7.240281 | -0.647606 | 1.306341  | H                                  | 7.256849 | -0.674756 | 0.104508  |
| H                                  | 6.696927 | -1.922942 | 0.200287  | H                                  | 6.394834 | -2.224141 | 0.128551  |
| H                                  | 5.884006 | -1.704618 | 1.759859  | H                                  | 6.112707 | -1.038405 | 1.415889  |
| H                                  | 5.961351 | 1.478854  | 1.519517  | H                                  | 6.108506 | 1.410732  | -0.574126 |
| H                                  | 4.647576 | 0.509764  | 2.210952  | H                                  | 5.008817 | 1.228737  | 0.80512   |
| H                                  | 4.403472 | 2.256811  | 0.004257  | H                                  | 4.185975 | 1.431655  | -1.888018 |
| H                                  | 6.192084 | -0.049597 | -1.53593  | H                                  | 5.376195 | -1.535442 | -2.186303 |
| Free Energy = -1857.585144 Hartree |          |           |           | Free Energy = -1857.584979 Hartree |          |           |           |

| conf. 3d-5 | X axis(Å) | Y axis(Å) | Z axis(Å) | conf. 3d-6 | X axis(Å) | Y axis(Å) | Z axis(Å) |
|------------|-----------|-----------|-----------|------------|-----------|-----------|-----------|
| C          | -0.068077 | -2.820684 | -1.806908 | C          | -0.38243  | -3.175412 | -0.534783 |
| C          | -1.447883 | -2.578256 | -1.659222 | C          | 0.947808  | -3.069768 | -0.079722 |
| C          | -1.937924 | -1.351984 | -1.211043 | C          | 1.526138  | -1.840281 | 0.231799  |
| C          | -0.977602 | -0.371534 | -0.893767 | C          | 0.703136  | -0.706718 | 0.080855  |
| C          | 0.418668  | -0.599169 | -1.01168  | C          | -0.647084 | -0.789802 | -0.34394  |
| C          | 0.868477  | -1.841702 | -1.498547 | C          | -1.183985 | -2.048813 | -0.674278 |
| N          | -1.145032 | 0.942032  | -0.483831 | N          | 0.986754  | 0.631514  | 0.270143  |
| C          | 0.085562  | 1.557028  | -0.338473 | C          | -0.120426 | 1.407999  | -0.024829 |
| C          | 1.085937  | 0.636355  | -0.648318 | C          | -1.168444 | 0.564797  | -0.395593 |
| C          | 2.518448  | 0.90844   | -0.68257  | C          | -2.530938 | 0.919652  | -0.797398 |
| C          | 3.521594  | 0.111582  | -0.247217 | C          | -3.673154 | 0.367755  | -0.32972  |
| C          | 4.935202  | 0.563199  | -0.405714 | C          | -4.98475  | 0.821049  | -0.883239 |
| N          | 5.883903  | -0.30444  | 0.067786  | N          | -6.093002 | 0.228813  | -0.345948 |
| C          | 5.693096  | -1.720739 | 0.37969   | C          | -6.156233 | -0.896189 | 0.584594  |
| C          | 4.257892  | -2.007913 | 0.827909  | C          | -4.808606 | -1.193482 | 1.238472  |
| N          | 3.312871  | -1.096826 | 0.44694   | N          | -3.708975 | -0.574316 | 0.71553   |
| C          | 0.203303  | 3.030268  | 0.045651  | C          | 0.009475  | 2.921171  | 0.144462  |
| C          | 1.349779  | 3.211079  | 1.03403   | C          | 1.118465  | 3.402541  | -0.789271 |
| C          | 2.340494  | 4.103539  | 0.969751  | C          | 2.194431  | 4.129936  | -0.471605 |
| C          | -1.075856 | 3.52612   | 0.770241  | C          | 0.301432  | 3.242441  | 1.629991  |
| C          | 0.387424  | 3.865393  | -1.244736 | C          | -1.27557  | 3.676036  | -0.269379 |
| C          | 6.704022  | -2.17887  | 1.433103  | C          | -6.711411 | -2.167169 | -0.084418 |
| C          | -3.421068 | -1.073653 | -1.123694 | C          | 2.950576  | -1.723052 | 0.725161  |
| C          | -3.955076 | -0.923025 | 0.309704  | C          | 3.898439  | -1.015455 | -0.257394 |
| C          | -5.306282 | -0.17852  | 0.457933  | C          | 5.184982  | -0.40207  | 0.350271  |
| O          | -5.582955 | 0.008221  | 1.855819  | O          | 5.86364   | 0.351864  | -0.666936 |
| C          | -5.168623 | 1.264552  | -0.065829 | C          | 4.813818  | 0.666808  | 1.399223  |
| O          | -4.006952 | 1.929676  | 0.431999  | O          | 3.782608  | 1.556927  | 0.971464  |
| H          | -3.226208 | -0.403695 | 0.93055   | H          | 3.37462   | -0.215767 | -0.778626 |

|                                    |           |           |           |                                    |           |           |           |
|------------------------------------|-----------|-----------|-----------|------------------------------------|-----------|-----------|-----------|
| C                                  | -6.482325 | -0.867264 | -0.241469 | C                                  | 6.129284  | -1.428138 | 0.98536   |
| O                                  | 3.970015  | -3.023423 | 1.451761  | O                                  | -4.732895 | -1.975575 | 2.179998  |
| O                                  | 5.239317  | 1.654176  | -0.887335 | O                                  | -5.073467 | 1.689642  | -1.751104 |
| H                                  | 0.26444   | -3.787214 | -2.175624 | H                                  | -0.782336 | -4.155466 | -0.780237 |
| H                                  | -2.15567  | -3.363656 | -1.913264 | H                                  | 1.546606  | -3.971661 | 0.0233    |
| H                                  | 1.927344  | -2.030917 | -1.64407  | H                                  | -2.202662 | -2.138602 | -1.039641 |
| H                                  | -2.034802 | 1.368964  | -0.240873 | H                                  | 1.885674  | 1.009917  | 0.566071  |
| H                                  | 2.856314  | 1.860903  | -1.076532 | H                                  | -2.688482 | 1.687394  | -1.546679 |
| H                                  | 6.835959  | 0.009227  | -0.089911 | H                                  | -6.965143 | 0.546558  | -0.755547 |
| H                                  | 5.841933  | -2.326273 | -0.531542 | H                                  | -6.822215 | -0.621344 | 1.412508  |
| H                                  | 2.361908  | -1.331284 | 0.717644  | H                                  | -2.828872 | -0.818754 | 1.161677  |
| H                                  | 1.295023  | 2.551259  | 1.901307  | H                                  | 0.958929  | 3.134468  | -1.835303 |
| H                                  | 2.471985  | 4.782531  | 0.131804  | H                                  | 2.41616   | 4.438937  | 0.546405  |
| H                                  | 3.084775  | 4.165271  | 1.759032  | H                                  | 2.890326  | 4.45735   | -1.240944 |
| H                                  | -1.963661 | 3.473764  | 0.131204  | H                                  | -0.508944 | 2.858146  | 2.258587  |
| H                                  | -0.937545 | 4.571905  | 1.06208   | H                                  | 0.361518  | 4.326063  | 1.78261   |
| H                                  | -1.26921  | 2.948512  | 1.68237   | H                                  | 1.23994   | 2.798549  | 1.976756  |
| H                                  | 0.420257  | 4.936182  | -1.012327 | H                                  | -1.130537 | 4.74612   | -0.086911 |
| H                                  | -0.453539 | 3.693981  | -1.925474 | H                                  | -2.142277 | 3.342306  | 0.309391  |
| H                                  | 1.308513  | 3.60023   | -1.7731   | H                                  | -1.502821 | 3.550622  | -1.332364 |
| H                                  | 6.554446  | -3.237838 | 1.654911  | H                                  | -6.775947 | -2.975321 | 0.64976   |
| H                                  | 6.583181  | -1.606006 | 2.358432  | H                                  | -6.066946 | -2.485122 | -0.911434 |
| H                                  | 7.726707  | -2.037665 | 1.063636  | H                                  | -7.713867 | -1.975076 | -0.484094 |
| H                                  | -3.978628 | -1.860432 | -1.641656 | H                                  | 3.345268  | -2.714537 | 0.968566  |
| H                                  | -3.634178 | -0.138681 | -1.659    | H                                  | 2.952583  | -1.149334 | 1.661614  |
| Cl                                 | -4.07241  | -2.58016  | 1.107807  | Cl                                 | 4.349247  | -2.168354 | -1.625246 |
| H                                  | -7.392278 | -0.275041 | -0.09901  | H                                  | 6.994734  | -0.914127 | 1.416664  |
| H                                  | -6.654083 | -1.863579 | 0.176447  | H                                  | 6.492104  | -2.137239 | 0.23556   |
| H                                  | -6.303352 | -0.976534 | -1.317342 | H                                  | 5.631678  | -1.998036 | 1.778598  |
| H                                  | -6.074909 | 1.811267  | 0.223732  | H                                  | 5.727267  | 1.226544  | 1.636189  |
| H                                  | -5.089204 | 1.288472  | -1.15427  | H                                  | 4.449052  | 0.205596  | 2.319175  |
| H                                  | -4.091729 | 1.974618  | 1.399774  | H                                  | 4.104143  | 2.059576  | 0.203668  |
| H                                  | -5.535496 | -0.855558 | 2.301186  | H                                  | 6.001008  | -0.223681 | -1.439299 |
| Free Energy = -1857.584463 Hartree |           |           |           | Free Energy = -1857.584425 Hartree |           |           |           |

| conf. 3d-7 | X axis(Å) | Y axis(Å) | Z axis(Å) | conf. 3d-8 | X axis(Å) | Y axis(Å) | Z axis(Å) |
|------------|-----------|-----------|-----------|------------|-----------|-----------|-----------|
| C          | -0.084117 | -3.185296 | -0.408638 | C          | -0.294143 | -3.1732   | -0.301751 |
| C          | 1.245463  | -2.99762  | 0.018735  | C          | 1.031046  | -2.991633 | 0.142888  |
| C          | 1.753973  | -1.732449 | 0.310435  | C          | 1.580317  | -1.723659 | 0.328829  |
| C          | 0.862667  | -0.651437 | 0.168527  | C          | 0.73374   | -0.629983 | 0.060697  |
| C          | -0.491385 | -0.818229 | -0.219882 | C          | -0.616199 | -0.7873   | -0.344551 |
| C          | -0.955512 | -2.109841 | -0.534535 | C          | -1.121955 | -2.084868 | -0.550104 |

|   |           |           |           |   |           |           |           |
|---|-----------|-----------|-----------|---|-----------|-----------|-----------|
| N | 1.069651  | 0.704088  | 0.353273  | N | 0.979479  | 0.727527  | 0.126694  |
| C | -0.092539 | 1.408649  | 0.088851  | C | -0.15456  | 1.445009  | -0.217914 |
| C | -1.093445 | 0.502192  | -0.25807  | C | -1.178123 | 0.542086  | -0.505028 |
| C | -2.464233 | 0.813456  | -0.66006  | C | -2.552221 | 0.822188  | -0.926326 |
| C | -3.591241 | 0.185842  | -0.252967 | C | -3.676613 | 0.282971  | -0.404176 |
| C | -4.910333 | 0.615465  | -0.805666 | C | -5.003097 | 0.6526    | -0.984268 |
| N | -6.001117 | -0.056269 | -0.323724 | N | -6.091952 | 0.082688  | -0.386395 |
| C | -6.01181  | -1.289889 | 0.459911  | C | -6.117501 | -0.969479 | 0.62752   |
| C | -4.685882 | -1.528992 | 1.177838  | C | -4.760898 | -1.168429 | 1.299703  |
| N | -3.608603 | -0.810662 | 0.743037  | N | -3.681569 | -0.563763 | 0.720273  |
| C | -0.089436 | 2.933312  | 0.166911  | C | -0.083234 | 2.970148  | -0.141662 |
| C | -1.497278 | 3.455854  | 0.413058  | C | 0.183159  | 3.334941  | 1.317754  |
| C | -2.132003 | 4.415797  | -0.264154 | C | 1.231163  | 3.99876   | 1.81376   |
| C | 0.528456  | 3.496096  | -1.135594 | C | -1.411735 | 3.648398  | -0.546299 |
| C | 0.764105  | 3.409817  | 1.378027  | C | 1.02211   | 3.486345  | -1.092761 |
| C | -6.380718 | -2.520515 | -0.390877 | C | -6.627605 | -2.30694  | 0.059227  |
| C | 3.179833  | -1.527116 | 0.768279  | C | 2.997334  | -1.526097 | 0.816797  |
| C | 4.082618  | -0.853171 | -0.278994 | C | 3.968416  | -1.017883 | -0.262186 |
| C | 5.351083  | -0.147354 | 0.264303  | C | 5.252529  | -0.317529 | 0.251443  |
| O | 6.007738  | 0.53044   | -0.819539 | O | 5.993836  | 0.180769  | -0.874879 |
| C | 4.949408  | 1.010046  | 1.200404  | C | 4.879099  | 0.971544  | 1.011401  |
| O | 3.958255  | 1.866316  | 0.629422  | O | 3.977609  | 1.800338  | 0.278479  |
| H | 3.515642  | -0.116623 | -0.847156 | H | 3.459056  | -0.323892 | -0.929936 |
| C | 6.32318   | -1.082189 | 0.990481  | C | 6.135109  | -1.202043 | 1.136795  |
| O | -4.60228  | -2.354854 | 2.080953  | O | -4.65979  | -1.863985 | 2.304555  |
| O | -5.02498  | 1.534309  | -1.616401 | O | -5.119873 | 1.44036   | -1.922897 |
| H | -0.429807 | -4.188802 | -0.641292 | H | -0.671208 | -4.181868 | -0.446895 |
| H | 1.899748  | -3.860697 | 0.115981  | H | 1.648678  | -3.864117 | 0.342024  |
| H | -1.973819 | -2.265187 | -0.877222 | H | -2.139225 | -2.234251 | -0.89956  |
| H | 1.962682  | 1.136498  | 0.572695  | H | 1.869642  | 1.15922   | 0.358803  |
| H | -2.636391 | 1.634284  | -1.347495 | H | -2.733244 | 1.516795  | -1.739063 |
| H | -6.87746  | 0.238852  | -0.741286 | H | -6.974679 | 0.340042  | -0.815275 |
| H | -6.756938 | -1.181566 | 1.256963  | H | -6.793396 | -0.65465  | 1.43261   |
| H | -2.736469 | -1.016026 | 1.222857  | H | -2.793212 | -0.742897 | 1.180781  |
| H | -1.992585 | 3.013309  | 1.277982  | H | -0.602427 | 3.007968  | 2.00133   |
| H | -1.710719 | 4.900033  | -1.141073 | H | 2.055234  | 4.346275  | 1.197088  |
| H | -3.12717  | 4.737239  | 0.030585  | H | 1.298704  | 4.215602  | 2.877073  |
| H | 1.536314  | 3.093386  | -1.284362 | H | -1.65654  | 3.457474  | -1.595992 |
| H | 0.608436  | 4.588168  | -1.088088 | H | -1.308074 | 4.731208  | -0.417563 |
| H | -0.073253 | 3.229244  | -2.010726 | H | -2.252259 | 3.314372  | 0.068985  |
| H | 0.710951  | 4.501373  | 1.447506  | H | 1.057643  | 4.581462  | -1.072103 |
| H | 1.819324  | 3.134125  | 1.279266  | H | 0.806727  | 3.172371  | -2.119832 |
| H | 0.384041  | 2.991783  | 2.317242  | H | 2.014473  | 3.11406   | -0.822717 |

|                                   |           |           |           |                                    |           |           |           |
|-----------------------------------|-----------|-----------|-----------|------------------------------------|-----------|-----------|-----------|
| H                                 | -6.411572 | -3.414067 | 0.239759  | H                                  | -6.665382 | -3.057972 | 0.85351   |
| H                                 | -5.649765 | -2.673366 | -1.19271  | H                                  | -5.971401 | -2.665173 | -0.741678 |
| H                                 | -7.366996 | -2.380085 | -0.848116 | H                                  | -7.635459 | -2.180833 | -0.352896 |
| H                                 | 3.618309  | -2.48363  | 1.06988   | H                                  | 3.3797    | -2.458457 | 1.244248  |
| H                                 | 3.17549   | -0.892767 | 1.664874  | H                                  | 2.989248  | -0.792106 | 1.63373   |
| Cl                                | 4.565908  | -2.082863 | -1.565182 | Cl                                 | 4.430515  | -2.409957 | -1.380199 |
| H                                 | 7.187431  | -0.510933 | 1.344844  | H                                  | 7.01902   | -0.638792 | 1.453336  |
| H                                 | 6.684182  | -1.866346 | 0.318231  | H                                  | 6.471896  | -2.088257 | 0.590609  |
| H                                 | 5.848693  | -1.566059 | 1.852007  | H                                  | 5.59787   | -1.537814 | 2.031274  |
| H                                 | 5.857601  | 1.580945  | 1.431341  | H                                  | 5.810918  | 1.51215   | 1.222426  |
| H                                 | 4.530053  | 0.641623  | 2.138434  | H                                  | 4.389689  | 0.751866  | 1.962273  |
| H                                 | 4.330736  | 2.225676  | -0.194394 | H                                  | 4.4055    | 1.996734  | -0.573193 |
| H                                 | 6.158365  | -0.106062 | -1.539952 | H                                  | 6.130971  | -0.547976 | -1.504833 |
| Free Energy = -1857.58436 Hartree |           |           |           | Free Energy = -1857.584302 Hartree |           |           |           |

**Table S24.** The Cartesian coordinates of the lowest energy conformers (Conf. 1-7) for isomer **4a**.

| conf. 4a-1 | X axis(Å) | Y axis(Å) | Z axis(Å) | conf. 4a-2 | X axis(Å) | Y axis(Å) | Z axis(Å) |
|------------|-----------|-----------|-----------|------------|-----------|-----------|-----------|
| C          | -0.136226 | -2.677557 | -1.73852  | C          | 0.059602  | -3.030162 | 0.208732  |
| C          | -1.488149 | -2.296958 | -1.625978 | C          | 1.316175  | -2.769908 | -0.375652 |
| C          | -1.866549 | -1.011262 | -1.23262  | C          | 1.72183   | -1.480541 | -0.730632 |
| C          | -0.814828 | -0.130511 | -0.922017 | C          | 0.786073  | -0.457478 | -0.483666 |
| C          | 0.556321  | -0.49097  | -1.006266 | C          | -0.506117 | -0.695199 | 0.057631  |
| C          | 0.889933  | -1.784845 | -1.450558 | C          | -0.855178 | -2.007935 | 0.430942  |
| N          | -0.868007 | 1.201373  | -0.560757 | N          | 0.896778  | 0.901627  | -0.68792  |
| C          | 0.403629  | 1.703892  | -0.389814 | C          | -0.251098 | 1.54707   | -0.288832 |
| C          | 1.326893  | 0.689702  | -0.655949 | C          | -1.167398 | 0.592181  | 0.163521  |
| C          | 2.775206  | 0.837757  | -0.644144 | C          | -2.494813 | 0.854732  | 0.705108  |
| C          | 3.701588  | -0.041252 | -0.194945 | C          | -3.636067 | 0.16348   | 0.477375  |
| C          | 5.148654  | 0.302306  | -0.308713 | C          | -4.895589 | 0.591094  | 1.15522   |
| N          | 6.013967  | -0.649836 | 0.164324  | N          | -5.998963 | -0.167934 | 0.873054  |
| C          | 5.700119  | -2.057509 | 0.410012  | C          | -6.011688 | -1.501077 | 0.2708    |
| C          | 4.24346   | -2.233365 | 0.847374  | C          | -4.813349 | -1.708815 | -0.659126 |
| N          | 3.38288   | -1.238692 | 0.476848  | N          | -3.737398 | -0.891577 | -0.449272 |
| C          | 0.629316  | 3.163099  | 0.000326  | C          | -0.344431 | 3.071279  | -0.371905 |
| C          | 1.621644  | 3.22636   | 1.156185  | C          | 0.762058  | 3.59691   | -1.277985 |
| C          | 2.739876  | 3.952114  | 1.226745  | C          | 1.757737  | 4.425912  | -0.95131  |
| C          | -0.686598 | 3.808831  | 0.508015  | C          | -0.257538 | 3.664142  | 1.053614  |
| C          | 1.102871  | 3.952717  | -1.243367 | C          | -1.68407  | 3.503732  | -1.030046 |
| C          | 6.664369  | -2.649723 | 1.439206  | C          | -7.331539 | -1.744339 | -0.46425  |
| C          | -3.32685  | -0.600167 | -1.233836 | C          | 3.049224  | -1.256298 | -1.430349 |
| C          | -3.939872 | -0.333787 | 0.156943  | C          | 4.156633  | -0.384478 | -0.794545 |

|                                   |           |           |           |                                    |           |           |           |
|-----------------------------------|-----------|-----------|-----------|------------------------------------|-----------|-----------|-----------|
| C                                 | -5.490582 | -0.407345 | 0.161584  | C                                  | 4.616841  | -0.785972 | 0.629302  |
| C                                 | -6.163122 | 0.612217  | -0.750616 | C                                  | 3.640621  | -0.466153 | 1.754398  |
| C                                 | -6.036947 | -1.822475 | -0.096535 | C                                  | 5.083258  | -2.246636 | 0.708847  |
| O                                 | -5.44222  | -2.838136 | 0.688494  | O                                  | 5.990278  | -2.633769 | -0.309365 |
| O                                 | -3.494869 | 0.970641  | 0.555826  | O                                  | 3.725962  | 0.981194  | -0.844758 |
| Cl                                | -6.004864 | 0.003106  | 1.926898  | Cl                                 | 6.16087   | 0.263783  | 0.943172  |
| O                                 | 3.866438  | -3.231562 | 1.451901  | O                                  | -4.805162 | -2.591231 | -1.509861 |
| O                                 | 5.550567  | 1.37707   | -0.754592 | O                                  | -4.958578 | 1.582487  | 1.882541  |
| H                                 | 0.104197  | -3.684035 | -2.070335 | H                                  | -0.198085 | -4.050915 | 0.478231  |
| H                                 | -2.262115 | -3.019439 | -1.875687 | H                                  | 1.987704  | -3.604017 | -0.569256 |
| H                                 | 1.925971  | -2.08229  | -1.577431 | H                                  | -1.815853 | -2.221596 | 0.88902   |
| H                                 | -1.72194  | 1.622262  | -0.213096 | H                                  | 1.775205  | 1.355619  | -0.924172 |
| H                                 | 3.202191  | 1.766972  | -1.005691 | H                                  | -2.630249 | 1.706905  | 1.36467   |
| H                                 | 6.991393  | -0.411779 | 0.031562  | H                                  | -6.833394 | 0.122995  | 1.371766  |
| H                                 | 5.796854  | -2.631328 | -0.528657 | H                                  | -5.90625  | -2.266465 | 1.059425  |
| H                                 | 2.413366  | -1.393418 | 0.738226  | H                                  | -2.93662  | -1.076914 | -1.046815 |
| H                                 | 1.334757  | 2.621361  | 2.018033  | H                                  | 0.686561  | 3.262417  | -2.314602 |
| H                                 | 3.356698  | 3.936691  | 2.121346  | H                                  | 2.470326  | 4.76123   | -1.700865 |
| H                                 | 3.102151  | 4.563188  | 0.404635  | H                                  | 1.900762  | 4.807895  | 0.055908  |
| H                                 | -1.458877 | 3.823008  | -0.270817 | H                                  | -1.075804 | 3.293176  | 1.677296  |
| H                                 | -0.489797 | 4.845387  | 0.798558  | H                                  | -0.33189  | 4.757248  | 1.020319  |
| H                                 | -1.083551 | 3.287683  | 1.387433  | H                                  | 0.684197  | 3.394327  | 1.543898  |
| H                                 | 2.054074  | 3.57844   | -1.632887 | H                                  | -1.783244 | 3.077792  | -2.034898 |
| H                                 | 1.228111  | 5.014384  | -1.000473 | H                                  | -1.713319 | 4.59581   | -1.116599 |
| H                                 | 0.357859  | 3.87323   | -2.04245  | H                                  | -2.547731 | 3.183927  | -0.441851 |
| H                                 | 7.69642   | -2.580983 | 1.075044  | H                                  | -8.173629 | -1.669009 | 0.233968  |
| H                                 | 6.591175  | -2.11231  | 2.390381  | H                                  | -7.470314 | -1.007464 | -1.26221  |
| H                                 | 6.422949  | -3.700753 | 1.612336  | H                                  | -7.331204 | -2.743047 | -0.906384 |
| H                                 | -3.46455  | 0.307728  | -1.837381 | H                                  | 3.498488  | -2.231809 | -1.642959 |
| H                                 | -3.889059 | -1.396977 | -1.728812 | H                                  | 2.864869  | -0.790859 | -2.409009 |
| H                                 | -3.566717 | -1.084017 | 0.861605  | H                                  | 5.02465   | -0.502311 | -1.452208 |
| H                                 | -7.249915 | 0.589938  | -0.626642 | H                                  | 4.101483  | -0.663165 | 2.727155  |
| H                                 | -5.932922 | 0.377792  | -1.797392 | H                                  | 2.748471  | -1.092664 | 1.656427  |
| H                                 | -5.804917 | 1.622315  | -0.53894  | H                                  | 3.328112  | 0.579623  | 1.720665  |
| H                                 | -5.830695 | -2.092625 | -1.137169 | H                                  | 4.203844  | -2.887311 | 0.588482  |
| H                                 | -7.12829  | -1.803241 | 0.029139  | H                                  | 5.49956   | -2.433193 | 1.708015  |
| H                                 | -5.694242 | -2.698461 | 1.61654   | H                                  | 6.82322   | -2.151532 | -0.175183 |
| H                                 | -3.78404  | 1.126837  | 1.470749  | H                                  | 4.465368  | 1.551497  | -0.5748   |
| Free Energy = -1857.58424 Hartree |           |           |           | Free Energy = -1857.582993 Hartree |           |           |           |

| conf. 4a-3 | X axis(Å) | Y axis(Å) | Z axis(Å) | conf. 4a-4 | X axis(Å) | Y axis(Å) | Z axis(Å) |
|------------|-----------|-----------|-----------|------------|-----------|-----------|-----------|
| C          | 0.040827  | -3.012307 | 0.295371  | C          | 0.325139  | -3.014615 | 0.231712  |

|    |           |           |           |    |           |           |           |
|----|-----------|-----------|-----------|----|-----------|-----------|-----------|
| C  | 1.282426  | -2.754135 | -0.321482 | C  | 1.565144  | -2.703365 | -0.363264 |
| C  | 1.685318  | -1.465617 | -0.68258  | C  | 1.907174  | -1.400288 | -0.734431 |
| C  | 0.760695  | -0.438559 | -0.408537 | C  | 0.925122  | -0.421029 | -0.493913 |
| C  | -0.513419 | -0.674335 | 0.172859  | C  | -0.352305 | -0.71039  | 0.056636  |
| C  | -0.861357 | -1.986094 | 0.548133  | C  | -0.635951 | -2.03404  | 0.447366  |
| N  | 0.866002  | 0.919257  | -0.612996 | N  | 0.976904  | 0.939355  | -0.712446 |
| C  | -0.26797  | 1.568904  | -0.169283 | C  | -0.194434 | 1.538549  | -0.308127 |
| C  | -1.170314 | 0.614053  | 0.306463  | C  | -1.068795 | 0.548088  | 0.15012   |
| C  | -2.505929 | 0.832318  | 0.859223  | C  | -2.412591 | 0.774045  | 0.66387   |
| C  | -3.631742 | 0.146132  | 0.555598  | C  | -3.519482 | 0.019496  | 0.469253  |
| C  | -4.908611 | 0.492329  | 1.249308  | C  | -4.79961  | 0.423428  | 1.120967  |
| N  | -5.99667  | -0.251134 | 0.880545  | N  | -5.868447 | -0.395992 | 0.869642  |
| C  | -5.988755 | -1.51727  | 0.148253  | C  | -5.814839 | -1.761531 | 0.347926  |
| C  | -4.761239 | -1.639149 | -0.75789  | C  | -4.606039 | -1.962427 | -0.569677 |
| N  | -3.700178 | -0.831962 | -0.454506 | N  | -3.569518 | -1.087819 | -0.400573 |
| C  | -0.353836 | 3.078425  | -0.392474 | C  | -0.381811 | 3.05207   | -0.401332 |
| C  | 0.980682  | 3.692527  | 0.019651  | C  | -1.676374 | 3.345029  | -1.152641 |
| C  | 1.837118  | 4.370487  | -0.750107 | C  | -2.69194  | 4.112785  | -0.751095 |
| C  | -1.439019 | 3.752677  | 0.479184  | C  | 0.763872  | 3.700988  | -1.221639 |
| C  | -0.687661 | 3.336195  | -1.881648 | C  | -0.359158 | 3.661992  | 1.020099  |
| C  | -7.284142 | -1.683768 | -0.649963 | C  | -7.119662 | -2.1122   | -0.370308 |
| C  | 2.993751  | -1.246056 | -1.418368 | C  | 3.2175    | -1.116818 | -1.444956 |
| C  | 4.121595  | -0.381049 | -0.81012  | C  | 4.286698  | -0.186516 | -0.826572 |
| C  | 4.617268  | -0.788229 | 0.600083  | C  | 4.771491  | -0.547441 | 0.599558  |
| C  | 3.674325  | -0.46433  | 1.751983  | C  | 3.785677  | -0.262395 | 1.72564   |
| C  | 5.077705  | -2.251408 | 0.664696  | C  | 5.309053  | -1.982695 | 0.694073  |
| O  | 5.954627  | -2.641671 | -0.378499 | O  | 6.224416  | -2.339293 | -0.327787 |
| O  | 3.695061  | 0.986092  | -0.845218 | O  | 3.801428  | 1.162947  | -0.891156 |
| Cl | 6.175794  | 0.252489  | 0.874025  | Cl | 6.264172  | 0.580415  | 0.892678  |
| O  | -4.719536 | -2.452513 | -1.673908 | O  | -4.555495 | -2.885415 | -1.375409 |
| O  | -4.996684 | 1.410831  | 2.063777  | O  | -4.911544 | 1.441043  | 1.804591  |
| H  | -0.214502 | -4.033591 | 0.565029  | H  | 0.117294  | -4.042822 | 0.515441  |
| H  | 1.944303  | -3.590528 | -0.537457 | H  | 2.273866  | -3.507307 | -0.551632 |
| H  | -1.812396 | -2.194379 | 1.028835  | H  | -1.582196 | -2.28757  | 0.914726  |
| H  | 1.740406  | 1.37485   | -0.861289 | H  | 1.83611   | 1.413546  | -0.969613 |
| H  | -2.655518 | 1.614877  | 1.594612  | H  | -2.597319 | 1.663912  | 1.255598  |
| H  | -6.843022 | -0.015528 | 1.38835   | H  | -6.714514 | -0.121292 | 1.357866  |
| H  | -5.909216 | -2.357115 | 0.860194  | H  | -5.673742 | -2.473644 | 1.179943  |
| H  | -2.876564 | -0.973797 | -1.032756 | H  | -2.76401  | -1.261656 | -0.994853 |
| H  | 1.22022   | 3.560169  | 1.076597  | H  | -1.72751  | 2.880458  | -2.138794 |
| H  | 2.749691  | 4.789238  | -0.332874 | H  | -3.557163 | 4.268317  | -1.390033 |
| H  | 1.667615  | 4.543809  | -1.809429 | H  | -2.722135 | 4.593095  | 0.223018  |
| H  | -2.44335  | 3.413128  | 0.211261  | H  | 1.739537  | 3.561387  | -0.73942  |

|                                    |           |           |           |                                    |           |           |           |
|------------------------------------|-----------|-----------|-----------|------------------------------------|-----------|-----------|-----------|
| H                                  | -1.397291 | 4.836188  | 0.323779  | H                                  | 0.585652  | 4.778078  | -1.297696 |
| H                                  | -1.281087 | 3.560519  | 1.546129  | H                                  | 0.816712  | 3.297528  | -2.239262 |
| H                                  | 0.064124  | 2.903638  | -2.550013 | H                                  | -1.169273 | 3.281468  | 1.648309  |
| H                                  | -0.752333 | 4.412199  | -2.081401 | H                                  | -0.450194 | 4.753211  | 0.970862  |
| H                                  | -1.654641 | 2.885772  | -2.128141 | H                                  | 0.588968  | 3.42436   | 1.514895  |
| H                                  | -8.148511 | -1.674619 | 0.024643  | H                                  | -7.9657   | -2.037428 | 0.323219  |
| H                                  | -7.397417 | -0.87166  | -1.375712 | H                                  | -7.292767 | -1.430915 | -1.209792 |
| H                                  | -7.268572 | -2.634598 | -1.187214 | H                                  | -7.069626 | -3.13386  | -0.75328  |
| H                                  | 3.432318  | -2.222994 | -1.646292 | H                                  | 3.713949  | -2.070873 | -1.650049 |
| H                                  | 2.784995  | -0.77636  | -2.390078 | H                                  | 3.004864  | -0.672859 | -2.427972 |
| H                                  | 4.97165   | -0.500918 | -1.490521 | H                                  | 5.155477  | -0.273719 | -1.487608 |
| H                                  | 4.160826  | -0.664849 | 2.711408  | H                                  | 4.259258  | -0.427367 | 2.698212  |
| H                                  | 2.776188  | -1.085621 | 1.678425  | H                                  | 2.923775  | -0.931272 | 1.6377    |
| H                                  | 3.366862  | 0.583187  | 1.727625  | H                                  | 3.424137  | 0.767126  | 1.683298  |
| H                                  | 4.191904  | -2.887156 | 0.567216  | H                                  | 4.461028  | -2.667193 | 0.591428  |
| H                                  | 5.52019   | -2.44196  | 1.65178   | H                                  | 5.743141  | -2.134597 | 1.691448  |
| H                                  | 6.792856  | -2.162705 | -0.267291 | H                                  | 7.037556  | -1.821964 | -0.203721 |
| H                                  | 4.443653  | 1.553024  | -0.594482 | H                                  | 4.52763   | 1.759416  | -0.641637 |
| Free Energy = -1857.582728 Hartree |           |           |           | Free Energy = -1857.582462 Hartree |           |           |           |

| conf. 4a-5 | X axis(Å) | Y axis(Å) | Z axis(Å) | conf. 4a-6 | X axis(Å) | Y axis(Å) | Z axis(Å) |
|------------|-----------|-----------|-----------|------------|-----------|-----------|-----------|
| C          | 0.040827  | -3.012307 | 0.295371  | C          | 0.341468  | -2.491248 | -1.943275 |
| C          | 1.282426  | -2.754135 | -0.321482 | C          | 1.67745   | -2.040802 | -1.924771 |
| C          | 1.685318  | -1.465617 | -0.68258  | C          | 2.022012  | -0.74699  | -1.523927 |
| C          | 0.760695  | -0.438559 | -0.408537 | C          | 0.950547  | 0.073996  | -1.126671 |
| C          | -0.513419 | -0.674335 | 0.172859  | C          | -0.402911 | -0.357204 | -1.113619 |
| C          | -0.861357 | -1.986094 | 0.548133  | C          | -0.703278 | -1.660924 | -1.554337 |
| N          | 0.866002  | 0.919257  | -0.612996 | N          | 0.961497  | 1.399831  | -0.745281 |
| C          | -0.26797  | 1.568904  | -0.169283 | C          | -0.318209 | 1.83393   | -0.477078 |
| C          | -1.170314 | 0.614053  | 0.306463  | C          | -1.204654 | 0.775073  | -0.687288 |
| C          | -2.505929 | 0.832318  | 0.859223  | C          | -2.655628 | 0.837072  | -0.560329 |
| C          | -3.631742 | 0.146132  | 0.555598  | C          | -3.474742 | -0.090904 | -0.013769 |
| C          | -4.908611 | 0.492329  | 1.249308  | C          | -4.947945 | 0.145998  | -0.004894 |
| N          | -5.99667  | -0.251134 | 0.880545  | N          | -5.700403 | -0.833728 | 0.58571   |
| C          | -5.988755 | -1.51727  | 0.148253  | C          | -5.268642 | -2.180197 | 0.955897  |
| C          | -4.761239 | -1.639149 | -0.75789  | C          | -3.75896  | -2.260775 | 1.167202  |
| N          | -3.700178 | -0.831962 | -0.454506 | N          | -3.008655 | -1.2489   | 0.640512  |
| C          | -0.353836 | 3.078425  | -0.392474 | C          | -0.590968 | 3.279187  | -0.067329 |
| C          | 0.980682  | 3.692527  | 0.019651  | C          | -1.533848 | 3.29583   | 1.130413  |
| C          | 1.837118  | 4.370487  | -0.750107 | C          | -2.671351 | 3.983123  | 1.256177  |
| C          | -1.439019 | 3.752677  | 0.479184  | C          | -1.154443 | 4.047404  | -1.286626 |
| C          | -0.687661 | 3.336195  | -1.881648 | C          | 0.716762  | 3.980946  | 0.385148  |

|                                    |           |           |           |                                   |           |           |           |
|------------------------------------|-----------|-----------|-----------|-----------------------------------|-----------|-----------|-----------|
| C                                  | -7.284142 | -1.683768 | -0.649963 | C                                 | -5.716652 | -3.242749 | -0.066511 |
| C                                  | 2.993751  | -1.246056 | -1.418368 | C                                 | 3.451892  | -0.254793 | -1.641877 |
| C                                  | 4.121595  | -0.381049 | -0.81012  | C                                 | 4.246072  | 0.203948  | -0.397377 |
| C                                  | 4.617268  | -0.788229 | 0.600083  | C                                 | 4.364642  | -0.819993 | 0.759184  |
| C                                  | 3.674325  | -0.46433  | 1.751983  | C                                 | 3.096865  | -1.04782  | 1.572909  |
| C                                  | 5.077705  | -2.251408 | 0.664696  | C                                 | 4.968838  | -2.156078 | 0.303468  |
| O                                  | 5.954627  | -2.641671 | -0.378499 | O                                 | 6.145884  | -2.036639 | -0.477401 |
| O                                  | 3.695061  | 0.986092  | -0.845218 | O                                 | 3.688636  | 1.446426  | 0.05539   |
| Cl                                 | 6.175794  | 0.252489  | 0.874025  | Cl                                | 5.632983  | -0.05733  | 1.938931  |
| O                                  | -4.719536 | -2.452513 | -1.673908 | O                                 | -3.256054 | -3.212808 | 1.755722  |
| O                                  | -4.996684 | 1.410831  | 2.063777  | O                                 | -5.462342 | 1.165725  | -0.464272 |
| H                                  | -0.214502 | -4.033591 | 0.565029  | H                                 | 0.128119  | -3.500968 | -2.283676 |
| H                                  | 1.944303  | -3.590528 | -0.537457 | H                                 | 2.462667  | -2.712183 | -2.266979 |
| H                                  | -1.812396 | -2.194379 | 1.028835  | H                                 | -1.729886 | -2.009803 | -1.605964 |
| H                                  | 1.740406  | 1.37485   | -0.861289 | H                                 | 1.818778  | 1.876838  | -0.487102 |
| H                                  | -2.655518 | 1.614877  | 1.594612  | H                                 | -3.172037 | 1.725673  | -0.907721 |
| H                                  | -6.843022 | -0.015528 | 1.38835   | H                                 | -6.698959 | -0.658373 | 0.546613  |
| H                                  | -5.909216 | -2.357115 | 0.860194  | H                                 | -5.710804 | -2.424537 | 1.928782  |
| H                                  | -2.876564 | -0.973797 | -1.032756 | H                                 | -2.006596 | -1.343316 | 0.779481  |
| H                                  | 1.22022   | 3.560169  | 1.076597  | H                                 | -1.189272 | 2.694216  | 1.973214  |
| H                                  | 2.749691  | 4.789238  | -0.332874 | H                                 | -3.248039 | 3.940052  | 2.176223  |
| H                                  | 1.667615  | 4.543809  | -1.809429 | H                                 | -3.087881 | 4.588966  | 0.456158  |
| H                                  | -2.44335  | 3.413128  | 0.211261  | H                                 | -0.444865 | 3.998656  | -2.119604 |
| H                                  | -1.397291 | 4.836188  | 0.323779  | H                                 | -1.31371  | 5.103216  | -1.038282 |
| H                                  | -1.281087 | 3.560519  | 1.546129  | H                                 | -2.105781 | 3.630389  | -1.630003 |
| H                                  | 0.064124  | 2.903638  | -2.550013 | H                                 | 1.179477  | 3.470338  | 1.238106  |
| H                                  | -0.752333 | 4.412199  | -2.081401 | H                                 | 0.486239  | 5.004583  | 0.695909  |
| H                                  | -1.654641 | 2.885772  | -2.128141 | H                                 | 1.449645  | 4.03894   | -0.428927 |
| H                                  | -8.148511 | -1.674619 | 0.024643  | H                                 | -6.808565 | -3.236181 | -0.162422 |
| H                                  | -7.397417 | -0.87166  | -1.375712 | H                                 | -5.284766 | -3.041008 | -1.05312  |
| H                                  | -7.268572 | -2.634598 | -1.187214 | H                                 | -5.401043 | -4.23649  | 0.26545   |
| H                                  | 3.432318  | -2.222994 | -1.646292 | H                                 | 4.049323  | -1.032415 | -2.128696 |
| H                                  | 2.784995  | -0.77636  | -2.390078 | H                                 | 3.478735  | 0.611095  | -2.319078 |
| H                                  | 4.97165   | -0.500918 | -1.490521 | H                                 | 5.262538  | 0.390965  | -0.759765 |
| H                                  | 4.160826  | -0.664849 | 2.711408  | H                                 | 3.309747  | -1.671238 | 2.4466    |
| H                                  | 2.776188  | -1.085621 | 1.678425  | H                                 | 2.349913  | -1.556209 | 0.955026  |
| H                                  | 3.366862  | 0.583187  | 1.727625  | H                                 | 2.671488  | -0.101357 | 1.913278  |
| H                                  | 4.191904  | -2.887156 | 0.567216  | H                                 | 4.233709  | -2.657318 | -0.334158 |
| H                                  | 5.52019   | -2.44196  | 1.65178   | H                                 | 5.13504   | -2.790204 | 1.184567  |
| H                                  | 6.792856  | -2.162705 | -0.267291 | H                                 | 6.855839  | -1.692983 | 0.090109  |
| H                                  | 4.443653  | 1.553024  | -0.594482 | H                                 | 4.268283  | 1.807038  | 0.747739  |
| Free Energy = -1857.582461 Hartree |           |           |           | Free Energy = -1857.58205 Hartree |           |           |           |



| conf. 4a-7 | X axis(Å) | Y axis(Å) | Z axis(Å) |
|------------|-----------|-----------|-----------|
| C          | 0.040827  | -3.012307 | 0.295371  |
| C          | 1.282426  | -2.754135 | -0.321482 |
| C          | 1.685318  | -1.465617 | -0.68258  |
| C          | 0.760695  | -0.438559 | -0.408537 |
| C          | -0.513419 | -0.674335 | 0.172859  |
| C          | -0.861357 | -1.986094 | 0.548133  |
| N          | 0.866002  | 0.919257  | -0.612996 |
| C          | -0.26797  | 1.568904  | -0.169283 |
| C          | -1.170314 | 0.614053  | 0.306463  |
| C          | -2.505929 | 0.832318  | 0.859223  |
| C          | -3.631742 | 0.146132  | 0.555598  |
| C          | -4.908611 | 0.492329  | 1.249308  |
| N          | -5.99667  | -0.251134 | 0.880545  |
| C          | -5.988755 | -1.51727  | 0.148253  |
| C          | -4.761239 | -1.639149 | -0.75789  |
| N          | -3.700178 | -0.831962 | -0.454506 |
| C          | -0.353836 | 3.078425  | -0.392474 |
| C          | 0.980682  | 3.692527  | 0.019651  |
| C          | 1.837118  | 4.370487  | -0.750107 |
| C          | -1.439019 | 3.752677  | 0.479184  |
| C          | -0.687661 | 3.336195  | -1.881648 |
| C          | -7.284142 | -1.683768 | -0.649963 |
| C          | 2.993751  | -1.246056 | -1.418368 |
| C          | 4.121595  | -0.381049 | -0.81012  |
| C          | 4.617268  | -0.788229 | 0.600083  |
| C          | 3.674325  | -0.46433  | 1.751983  |
| C          | 5.077705  | -2.251408 | 0.664696  |
| O          | 5.954627  | -2.641671 | -0.378499 |
| O          | 3.695061  | 0.986092  | -0.845218 |
| Cl         | 6.175794  | 0.252489  | 0.874025  |
| O          | -4.719536 | -2.452513 | -1.673908 |
| O          | -4.996684 | 1.410831  | 2.063777  |
| H          | -0.214502 | -4.033591 | 0.565029  |
| H          | 1.944303  | -3.590528 | -0.537457 |
| H          | -1.812396 | -2.194379 | 1.028835  |
| H          | 1.740406  | 1.37485   | -0.861289 |
| H          | -2.655518 | 1.614877  | 1.594612  |
| H          | -6.843022 | -0.015528 | 1.38835   |
| H          | -5.909216 | -2.357115 | 0.860194  |
| H          | -2.876564 | -0.973797 | -1.032756 |

|                                    |           |           |           |
|------------------------------------|-----------|-----------|-----------|
| H                                  | 1.22022   | 3.560169  | 1.076597  |
| H                                  | 2.749691  | 4.789238  | -0.332874 |
| H                                  | 1.667615  | 4.543809  | -1.809429 |
| H                                  | -2.44335  | 3.413128  | 0.211261  |
| H                                  | -1.397291 | 4.836188  | 0.323779  |
| H                                  | -1.281087 | 3.560519  | 1.546129  |
| H                                  | 0.064124  | 2.903638  | -2.550013 |
| H                                  | -0.752333 | 4.412199  | -2.081401 |
| H                                  | -1.654641 | 2.885772  | -2.128141 |
| H                                  | -8.148511 | -1.674619 | 0.024643  |
| H                                  | -7.397417 | -0.87166  | -1.375712 |
| H                                  | -7.268572 | -2.634598 | -1.187214 |
| H                                  | 3.432318  | -2.222994 | -1.646292 |
| H                                  | 2.784995  | -0.77636  | -2.390078 |
| H                                  | 4.97165   | -0.500918 | -1.490521 |
| H                                  | 4.160826  | -0.664849 | 2.711408  |
| H                                  | 2.776188  | -1.085621 | 1.678425  |
| H                                  | 3.366862  | 0.583187  | 1.727625  |
| H                                  | 4.191904  | -2.887156 | 0.567216  |
| H                                  | 5.52019   | -2.44196  | 1.65178   |
| H                                  | 6.792856  | -2.162705 | -0.267291 |
| H                                  | 4.443653  | 1.553024  | -0.594482 |
| Free Energy = -1857.582046 Hartree |           |           |           |

**Table S25.** The Cartesian coordinates of the lowest energy conformers (Conf. 1-4) for isomer **4b**.

| conf. 4b-1 | X axis(Å) | Y axis(Å) | Z axis(Å) | conf. 4b-2 | X axis(Å) | Y axis(Å) | Z axis(Å) |
|------------|-----------|-----------|-----------|------------|-----------|-----------|-----------|
| C          | 0.040701  | -2.683241 | -1.848388 | C          | 0.266358  | -2.736492 | -1.762701 |
| C          | -1.325079 | -2.367269 | -1.703793 | C          | -1.110943 | -2.469096 | -1.630448 |
| C          | -1.75394  | -1.127649 | -1.223716 | C          | -1.590512 | -1.231191 | -1.195936 |
| C          | -0.737457 | -0.223908 | -0.864415 | C          | -0.611916 | -0.273826 | -0.869454 |
| C          | 0.647085  | -0.521037 | -0.979294 | C          | 0.783323  | -0.520999 | -0.976509 |
| C          | 1.030666  | -1.769498 | -1.506521 | C          | 1.218185  | -1.771517 | -1.455707 |
| N          | -0.841801 | 1.077807  | -0.416972 | N          | -0.76191  | 1.037137  | -0.467724 |
| C          | 0.408592  | 1.62246   | -0.225645 | C          | 0.466046  | 1.636336  | -0.298057 |
| C          | 1.371047  | 0.665569  | -0.561632 | C          | 1.463312  | 0.707012  | -0.606521 |
| C          | 2.811814  | 0.873476  | -0.538419 | C          | 2.899814  | 0.953824  | -0.642758 |
| C          | 3.769202  | 0.010388  | -0.123604 | C          | 3.888274  | 0.148475  | -0.189388 |
| C          | 5.203119  | 0.417946  | -0.190156 | C          | 5.309813  | 0.576721  | -0.343195 |
| N          | 6.099617  | -0.527541 | 0.233985  | N          | 6.241454  | -0.304888 | 0.134856  |
| C          | 5.840305  | -1.957486 | 0.401484  | C          | 6.023991  | -1.714342 | 0.461028  |
| C          | 4.385108  | -2.215634 | 0.800901  | C          | 4.582957  | -1.971094 | 0.909859  |

|    |           |           |           |    |           |           |           |
|----|-----------|-----------|-----------|----|-----------|-----------|-----------|
| N  | 3.490743  | -1.234785 | 0.475471  | N  | 3.655292  | -1.045994 | 0.519223  |
| C  | 0.585175  | 3.054601  | 0.276335  | C  | 0.548025  | 3.105695  | 0.117382  |
| C  | 1.238392  | 3.860586  | -0.843891 | C  | -0.760295 | 3.513902  | 0.783761  |
| C  | 2.393472  | 4.529761  | -0.794735 | C  | -1.645157 | 4.420019  | 0.358162  |
| C  | 1.411914  | 3.060362  | 1.581067  | C  | 0.855256  | 3.960322  | -1.134587 |
| C  | -0.785135 | 3.714542  | 0.571931  | C  | 1.659526  | 3.327071  | 1.1782    |
| C  | 6.810539  | -2.562716 | 1.417731  | C  | 7.025102  | -2.179906 | 1.520547  |
| C  | -3.230815 | -0.785208 | -1.17916  | C  | -3.080516 | -0.95034  | -1.165975 |
| C  | -3.816752 | -0.552569 | 0.232731  | C  | -3.683367 | -0.733006 | 0.240374  |
| C  | -5.340955 | -0.835224 | 0.319183  | C  | -5.20319  | -1.043253 | 0.312213  |
| Cl | -5.834707 | -0.378943 | 2.079999  | Cl | -5.71885  | -0.604397 | 2.071731  |
| C  | -6.168242 | 0.071741  | -0.607154 | C  | -6.03844  | -0.145871 | -0.615855 |
| O  | -7.566741 | -0.138819 | -0.515718 | O  | -7.434395 | -0.378464 | -0.534592 |
| O  | -3.516174 | 0.807026  | 0.577169  | O  | -3.40826  | 0.628795  | 0.587621  |
| C  | -5.676533 | -2.315099 | 0.158421  | C  | -5.512731 | -2.52762  | 0.141364  |
| O  | 4.038661  | -3.262594 | 1.33724   | O  | 4.275307  | -2.975661 | 1.541544  |
| O  | 5.565725  | 1.536729  | -0.553494 | O  | 5.631098  | 1.664212  | -0.822503 |
| H  | 0.32002   | -3.65471  | -2.247228 | H  | 0.584353  | -3.710311 | -2.125293 |
| H  | -2.069799 | -3.102355 | -2.002166 | H  | -1.825427 | -3.24327  | -1.90268  |
| H  | 2.077341  | -2.015071 | -1.655873 | H  | 2.274529  | -1.979232 | -1.594883 |
| H  | -1.717025 | 1.459074  | -0.074778 | H  | -1.647373 | 1.423247  | -0.1567   |
| H  | 3.190941  | 1.840231  | -0.857463 | H  | 3.259323  | 1.886448  | -1.06808  |
| H  | 7.068494  | -0.241034 | 0.140134  | H  | 7.199959  | -0.00618  | -0.012507 |
| H  | 5.977215  | -2.477655 | -0.562984 | H  | 6.162977  | -2.331341 | -0.443889 |
| H  | 2.523876  | -1.445351 | 0.705891  | H  | 2.69823   | -1.261648 | 0.784266  |
| H  | 0.662516  | 3.873609  | -1.771008 | H  | -0.953346 | 3.007753  | 1.732394  |
| H  | 2.755489  | 5.079023  | -1.65995  | H  | -2.532922 | 4.64948   | 0.942335  |
| H  | 3.028255  | 4.547729  | 0.086781  | H  | -1.525151 | 4.969752  | -0.57143  |
| H  | 0.898827  | 2.474139  | 2.351619  | H  | 1.813939  | 3.66623   | -1.572201 |
| H  | 1.528118  | 4.084347  | 1.954318  | H  | 0.917786  | 5.022378  | -0.870151 |
| H  | 2.407053  | 2.630401  | 1.440224  | H  | 0.085529  | 3.836816  | -1.903887 |
| H  | -1.42134  | 3.764766  | -0.319441 | H  | 1.486219  | 2.707375  | 2.065382  |
| H  | -0.623292 | 4.740395  | 0.917515  | H  | 1.661718  | 4.37776   | 1.489553  |
| H  | -1.327717 | 3.179228  | 1.361449  | H  | 2.650825  | 3.085705  | 0.787832  |
| H  | 7.84485   | -2.435606 | 1.076511  | H  | 8.050604  | -2.060588 | 1.151281  |
| H  | 6.700446  | -2.077344 | 2.393054  | H  | 6.913136  | -1.596236 | 2.440204  |
| H  | 6.608346  | -3.62978  | 1.533678  | H  | 6.85645   | -3.233874 | 1.752164  |
| H  | -3.428714 | 0.121556  | -1.767681 | H  | -3.310606 | -0.056543 | -1.762311 |
| H  | -3.770529 | -1.600276 | -1.668732 | H  | -3.582623 | -1.790949 | -1.652614 |
| H  | -3.321913 | -1.226726 | 0.944554  | H  | -3.183337 | -1.402111 | 0.953694  |
| H  | -5.905155 | -0.174006 | -1.641641 | H  | -5.76489  | -0.383625 | -1.649534 |
| H  | -5.905424 | 1.120939  | -0.42902  | H  | -5.792927 | 0.906445  | -0.431933 |
| H  | -7.865409 | 0.157464  | 0.359923  | H  | -7.742003 | -0.094089 | 0.341916  |

|                                    |           |           |           |                                    |           |           |          |
|------------------------------------|-----------|-----------|-----------|------------------------------------|-----------|-----------|----------|
| H                                  | -3.836542 | 0.968537  | 1.481584  | H                                  | -3.72333  | 0.782873  | 1.494743 |
| H                                  | -6.736682 | -2.487609 | 0.353757  | H                                  | -6.570802 | -2.719677 | 0.329751 |
| H                                  | -5.082964 | -2.930389 | 0.841519  | H                                  | -4.912426 | -3.13668  | 0.82424  |
| H                                  | -5.474291 | -2.637966 | -0.869039 | H                                  | -5.299321 | -2.840947 | -0.88694 |
| Free Energy = -1857.584417 Hartree |           |           |           | Free Energy = -1857.584376 Hartree |           |           |          |

| conf. 4b-3 | X axis(Å) | Y axis(Å) | Z axis(Å) | conf. 4b-4 | X axis(Å) | Y axis(Å) | Z axis(Å) |
|------------|-----------|-----------|-----------|------------|-----------|-----------|-----------|
| C          | -0.341302 | -3.010721 | -0.935044 | C          | 0.278557  | -2.704304 | -1.879874 |
| C          | 0.974559  | -2.8354   | -0.460452 | C          | -1.096881 | -2.442477 | -1.715023 |
| C          | 1.453496  | -1.597464 | -0.025651 | C          | -1.572575 | -1.207696 | -1.268196 |
| C          | 0.537148  | -0.529596 | -0.085888 | C          | -0.590778 | -0.246384 | -0.961414 |
| C          | -0.805139 | -0.68648  | -0.522436 | C          | 0.801274  | -0.485116 | -1.111741 |
| C          | -1.237704 | -1.949406 | -0.969598 | C          | 1.232333  | -1.73387  | -1.598056 |
| N          | 0.705774  | 0.800721  | 0.229284  | N          | -0.733419 | 1.060874  | -0.551084 |
| C          | -0.454805 | 1.509446  | -0.012699 | C          | 0.497413  | 1.670801  | -0.425707 |
| C          | -1.435057 | 0.61989   | -0.454878 | C          | 1.488133  | 0.745452  | -0.762924 |
| C          | -2.825509 | 0.903779  | -0.81269  | C          | 2.934891  | 0.9495    | -0.796564 |
| C          | -3.918116 | 0.228607  | -0.389849 | C          | 3.878257  | 0.135879  | -0.268859 |
| C          | -5.263302 | 0.614384  | -0.911152 | C          | 5.320798  | 0.489802  | -0.42207  |
| N          | -6.31894  | -0.102858 | -0.42276  | N          | 6.204057  | -0.385661 | 0.148905  |
| C          | -6.32887  | -1.095515 | 0.6497    | C          | 5.925863  | -1.74578  | 0.609411  |
| C          | -4.924158 | -1.482733 | 1.111582  | C          | 4.456995  | -1.923839 | 1.001091  |
| N          | -3.870949 | -0.814028 | 0.554725  | N          | 3.578746  | -1.000608 | 0.506449  |
| C          | -0.469863 | 2.994931  | 0.344     | C          | 0.546439  | 3.088185  | 0.144171  |
| C          | 0.81888   | 3.619807  | -0.181472 | C          | -0.6604   | 3.855139  | -0.38575  |
| C          | 1.782618  | 4.215979  | 0.526978  | C          | -1.647942 | 4.408625  | 0.324129  |
| C          | -0.609486 | 3.131461  | 1.879224  | C          | 1.803333  | 3.867522  | -0.314158 |
| C          | -1.637339 | 3.75491   | -0.327523 | C          | 0.557146  | 2.998024  | 1.689348  |
| C          | -7.124485 | -2.342703 | 0.238659  | C          | 6.855198  | -2.121922 | 1.766355  |
| C          | 2.86195   | -1.46732  | 0.52249   | C          | -3.062566 | -0.933692 | -1.199897 |
| C          | 3.821222  | -0.591585 | -0.316129 | C          | -3.63042  | -0.71779  | 0.221336  |
| C          | 5.317617  | -0.956613 | -0.120836 | C          | -5.146163 | -1.036745 | 0.332414  |
| Cl         | 6.275345  | 0.304628  | -1.143783 | Cl         | -5.618896 | -0.600269 | 2.104063  |
| C          | 5.787777  | -0.777873 | 1.332204  | C          | -6.010037 | -0.144627 | -0.574346 |
| O          | 7.164568  | -1.052444 | 1.527567  | O          | -7.402182 | -0.384578 | -0.456724 |
| O          | 3.559624  | 0.763946  | 0.064371  | O          | -3.354469 | 0.646117  | 0.559802  |
| C          | 5.674773  | -2.323661 | -0.697373 | C          | -5.451448 | -2.523038 | 0.169847  |
| O          | -4.766397 | -2.348153 | 1.965986  | O          | 4.087817  | -2.873717 | 1.682591  |
| O          | -5.420759 | 1.5081    | -1.743078 | O          | 5.69857   | 1.519018  | -0.981408 |
| H          | -0.656766 | -3.994953 | -1.270641 | H          | 0.591816  | -3.677713 | -2.247611 |
| H          | 1.638664  | -3.69663  | -0.423267 | H          | -1.813729 | -3.220586 | -1.969401 |
| H          | -2.24749  | -2.091486 | -1.343809 | H          | 2.287265  | -1.934499 | -1.759381 |

|                                    |           |           |           |                                    |           |           |           |
|------------------------------------|-----------|-----------|-----------|------------------------------------|-----------|-----------|-----------|
| H                                  | 1.618005  | 1.215504  | 0.397889  | H                                  | -1.612015 | 1.447104  | -0.220934 |
| H                                  | -3.046933 | 1.714251  | -1.498698 | H                                  | 3.337186  | 1.828089  | -1.288828 |
| H                                  | -7.217175 | 0.19261   | -0.790662 | H                                  | 7.176832  | -0.135634 | 0.004451  |
| H                                  | -6.808757 | -0.659006 | 1.539541  | H                                  | 6.094441  | -2.458436 | -0.216361 |
| H                                  | -2.959584 | -1.085151 | 0.914327  | H                                  | 2.603147  | -1.17584  | 0.730919  |
| H                                  | 0.921066  | 3.573623  | -1.267535 | H                                  | -0.676891 | 3.958984  | -1.472213 |
| H                                  | 2.646594  | 4.655063  | 0.033943  | H                                  | -2.447817 | 4.956965  | -0.167086 |
| H                                  | 1.750974  | 4.301573  | 1.609883  | H                                  | -1.699451 | 4.348375  | 1.408078  |
| H                                  | -1.55041  | 2.678055  | 2.207651  | H                                  | 2.719545  | 3.438424  | 0.099829  |
| H                                  | -0.619036 | 4.187351  | 2.174226  | H                                  | 1.729955  | 4.902491  | 0.03714   |
| H                                  | 0.207096  | 2.630592  | 2.409824  | H                                  | 1.891407  | 3.886511  | -1.406178 |
| H                                  | -1.613267 | 3.655254  | -1.418297 | H                                  | -0.325386 | 2.475157  | 2.074182  |
| H                                  | -1.556357 | 4.820163  | -0.085597 | H                                  | 0.587524  | 3.999127  | 2.135393  |
| H                                  | -2.607894 | 3.400368  | 0.030223  | H                                  | 1.444077  | 2.450135  | 2.023259  |
| H                                  | -8.15649  | -2.068101 | -0.009389 | H                                  | 7.901938  | -2.068716 | 1.444298  |
| H                                  | -6.672174 | -2.818344 | -0.63819  | H                                  | 6.713947  | -1.440939 | 2.612156  |
| H                                  | -7.140406 | -3.058722 | 1.064022  | H                                  | 6.641437  | -3.140949 | 2.096423  |
| H                                  | 2.838212  | -1.044931 | 1.536536  | H                                  | -3.311561 | -0.040978 | -1.790251 |
| H                                  | 3.272131  | -2.476888 | 0.612209  | H                                  | -3.573364 | -1.776452 | -1.673561 |
| H                                  | 3.592165  | -0.725291 | -1.382074 | H                                  | -3.10847  | -1.383214 | 0.922297  |
| H                                  | 5.255592  | -1.50952  | 1.949643  | H                                  | -5.7622   | -0.381793 | -1.614609 |
| H                                  | 5.521794  | 0.224804  | 1.686059  | H                                  | -5.765509 | 0.909145  | -0.397529 |
| H                                  | 7.680635  | -0.371092 | 1.065806  | H                                  | -7.68824  | -0.101782 | 0.427566  |
| H                                  | 4.095946  | 1.351151  | -0.495387 | H                                  | -3.646428 | 0.799805  | 1.474691  |
| H                                  | 6.753899  | -2.483962 | -0.654515 | H                                  | -6.503338 | -2.721069 | 0.384864  |
| H                                  | 5.341669  | -2.413676 | -1.736005 | H                                  | -4.830741 | -3.128414 | 0.837587  |
| H                                  | 5.200522  | -3.116447 | -0.107916 | H                                  | -5.262241 | -2.835579 | -0.863364 |
| Free Energy = -1857.584306 Hartree |           |           |           | Free Energy = -1857.584082 Hartree |           |           |           |

**Table S26.** The Cartesian coordinates of the lowest energy conformers (Conf. 1-6) for isomer 4c.

| conf. 4c-1 | X axis(Å) | Y axis(Å) | Z axis(Å) | conf. 4c-1 | X axis(Å) | Y axis(Å) | Z axis(Å) |
|------------|-----------|-----------|-----------|------------|-----------|-----------|-----------|
| C          | -0.116548 | -2.767604 | -1.621877 | C          | -0.359334 | -2.745101 | -1.728915 |
| C          | 1.253047  | -2.447034 | -1.535044 | C          | 1.0217    | -2.491166 | -1.602852 |
| C          | 1.696743  | -1.184315 | -1.135227 | C          | 1.518432  | -1.246006 | -1.210894 |
| C          | 0.69219   | -0.260324 | -0.794777 | C          | 0.552584  | -0.264612 | -0.917535 |
| C          | -0.695299 | -0.560102 | -0.854279 | C          | -0.844612 | -0.494772 | -1.029997 |
| C          | -1.095314 | -1.834225 | -1.301499 | C          | -1.297794 | -1.7556   | -1.462283 |
| N          | 0.80975   | 1.064046  | -0.423922 | N          | 0.715469  | 1.055009  | -0.557987 |
| C          | -0.434935 | 1.621215  | -0.228645 | C          | -0.507295 | 1.680612  | -0.42828  |
| C          | -1.406556 | 0.649452  | -0.484334 | C          | -1.512815 | 0.753641  | -0.710764 |
| C          | -2.847112 | 0.859485  | -0.438299 | C          | -2.959389 | 0.967501  | -0.717523 |

|    |           |           |           |    |           |           |           |
|----|-----------|-----------|-----------|----|-----------|-----------|-----------|
| C  | -3.78914  | 0.026233  | 0.062699  | C  | -3.890714 | 0.188294  | -0.121848 |
| C  | -5.22693  | 0.422538  | -0.001382 | C  | -5.335832 | 0.5381    | -0.260106 |
| N  | -6.11175  | -0.482436 | 0.520935  | N  | -6.211315 | -0.283026 | 0.393409  |
| C  | -5.844258 | -1.878167 | 0.862566  | C  | -5.931356 | -1.539027 | 1.086062  |
| C  | -4.371261 | -2.11287  | 1.187783  | C  | -4.439465 | -1.75666  | 1.328627  |
| N  | -3.487182 | -1.17386  | 0.737823  | N  | -3.571965 | -0.913942 | 0.693798  |
| C  | -0.597051 | 3.080831  | 0.192563  | C  | -0.53341  | 3.118184  | 0.089668  |
| C  | -1.273165 | 3.820173  | -0.959572 | C  | 0.671793  | 3.853781  | -0.486209 |
| C  | -2.426551 | 4.49325   | -0.926762 | C  | 1.675662  | 4.422552  | 0.187778  |
| C  | 0.780526  | 3.752219  | 0.419287  | C  | -0.521593 | 3.085381  | 1.637158  |
| C  | -1.395624 | 3.166517  | 1.511876  | C  | -1.790573 | 3.891039  | -0.378945 |
| C  | -6.305595 | -2.854227 | -0.237495 | C  | -6.529979 | -2.749816 | 0.346597  |
| C  | 3.174175  | -0.842393 | -1.156059 | C  | 3.011891  | -0.983974 | -1.186957 |
| C  | 3.807891  | -0.552268 | 0.223799  | C  | 3.616112  | -0.7296   | 0.212608  |
| C  | 5.337499  | -0.816161 | 0.26458   | C  | 5.13326   | -1.050794 | 0.294443  |
| C  | 5.685065  | -2.29683  | 0.14007   | C  | 5.430777  | -2.5418   | 0.163446  |
| C  | 6.120838  | 0.068265  | -0.719901 | C  | 5.976947  | -0.185649 | -0.656374 |
| O  | 7.524165  | -0.123559 | -0.670504 | O  | 7.370839  | -0.427807 | -0.567221 |
| H  | 3.346614  | -1.205197 | 0.976804  | H  | 3.110274  | -1.372964 | 0.945287  |
| Cl | 5.887747  | -0.296357 | 1.990625  | Cl | 5.650781  | -0.569374 | 2.041789  |
| O  | -4.011708 | -3.117587 | 1.792873  | O  | -4.053385 | -2.668938 | 2.051756  |
| O  | -5.601551 | 1.504008  | -0.455013 | O  | -5.722981 | 1.51666   | -0.899169 |
| H  | -0.407845 | -3.75841  | -1.960006 | H  | -0.689251 | -3.727608 | -2.055642 |
| H  | 1.988242  | -3.198334 | -1.816103 | H  | 1.725726  | -3.284776 | -1.844836 |
| H  | -2.146306 | -2.083985 | -1.407502 | H  | -2.357829 | -1.950501 | -1.595592 |
| H  | 1.693217  | 1.4604    | -0.123102 | H  | 1.60378   | 1.444489  | -0.259518 |
| H  | -3.237821 | 1.799002  | -0.818861 | H  | -3.370461 | 1.819183  | -1.248523 |
| H  | -7.082362 | -0.200194 | 0.433459  | H  | -7.184512 | -0.025388 | 0.267557  |
| H  | -6.386098 | -2.111312 | 1.786169  | H  | -6.379946 | -1.488768 | 2.086622  |
| H  | -2.511652 | -1.370918 | 0.942978  | H  | -2.588469 | -1.106457 | 0.863934  |
| H  | -0.716852 | 3.776239  | -1.897652 | H  | 0.67186   | 3.918751  | -1.575826 |
| H  | -2.806131 | 4.990233  | -1.815737 | H  | 2.472568  | 4.945118  | -0.335328 |
| H  | -3.042741 | 4.565748  | -0.034846 | H  | 1.743968  | 4.400386  | 1.27222   |
| H  | 1.339573  | 3.260932  | 1.225768  | H  | -1.407888 | 2.558021  | 2.004082  |
| H  | 0.628276  | 4.796592  | 0.709233  | H  | -0.537084 | 4.102569  | 2.045924  |
| H  | 1.396404  | 3.749238  | -0.487599 | H  | 0.362189  | 2.569132  | 2.028044  |
| H  | -2.393315 | 2.729532  | 1.419147  | H  | -1.89357  | 3.87192   | -1.469668 |
| H  | -1.504414 | 4.211406  | 1.824819  | H  | -1.705081 | 4.937214  | -0.065566 |
| H  | -0.865916 | 2.627764  | 2.305489  | H  | -2.704017 | 3.483448  | 0.06211   |
| H  | -7.379551 | -2.734082 | -0.420811 | H  | -7.614593 | -2.629249 | 0.243175  |
| H  | -5.774403 | -2.663297 | -1.176691 | H  | -6.097922 | -2.846745 | -0.65552  |
| H  | -6.117792 | -3.885837 | 0.075645  | H  | -6.331808 | -3.665113 | 0.911571  |
| H  | 3.696789  | -1.678266 | -1.628866 | H  | 3.503699  | -1.845903 | -1.64602  |

|                                    |          |           |           |                                    |          |           |           |
|------------------------------------|----------|-----------|-----------|------------------------------------|----------|-----------|-----------|
| H                                  | 3.351367 | 0.038207  | -1.789155 | H                                  | 3.253667 | -0.112604 | -1.811194 |
| O                                  | 3.504383 | 0.815625  | 0.529768  | O                                  | 3.352782 | 0.644284  | 0.518866  |
| H                                  | 6.752845 | -2.451659 | 0.306555  | H                                  | 6.486629 | -2.737702 | 0.360246  |
| H                                  | 5.454353 | -2.654106 | -0.869804 | H                                  | 5.218073 | -2.879905 | -0.857042 |
| H                                  | 5.120731 | -2.896326 | 0.860978  | H                                  | 4.823281 | -3.127813 | 0.860033  |
| H                                  | 5.851693 | 1.119891  | -0.567555 | H                                  | 5.740244 | 0.873229  | -0.500837 |
| H                                  | 5.824986 | -0.215157 | -1.735707 | H                                  | 5.702457 | -0.448552 | -1.683669 |
| H                                  | 7.848514 | 0.203042  | 0.185011  | H                                  | 7.679635 | -0.1237   | 0.302228  |
| H                                  | 3.854046 | 1.012823  | 1.416059  | H                                  | 3.66775  | 0.822708  | 1.421546  |
| Free Energy = -1857.584355 Hartree |          |           |           | Free Energy = -1857.584224 Hartree |          |           |           |

| conf. 4c-3 | X axis(Å) | Y axis(Å) | Z axis(Å) | conf. 4c-4 | X axis(Å) | Y axis(Å) | Z axis(Å) |
|------------|-----------|-----------|-----------|------------|-----------|-----------|-----------|
| C          | -0.35308  | -2.792253 | -1.564526 | C          | -0.101974 | -2.869926 | -1.469457 |
| C          | 1.028903  | -2.528673 | -1.482841 | C          | 1.267439  | -2.545974 | -1.39398  |
| C          | 1.527662  | -1.2755   | -1.119365 | C          | 1.710125  | -1.257245 | -1.086735 |
| C          | 0.564249  | -0.297191 | -0.81033  | C          | 0.704535  | -0.308408 | -0.827322 |
| C          | -0.834785 | -0.539278 | -0.867903 | C          | -0.682899 | -0.610448 | -0.87376  |
| C          | -1.290297 | -1.80728  | -1.27672  | C          | -1.081565 | -1.913819 | -1.227977 |
| N          | 0.732382  | 1.029956  | -0.474866 | N          | 0.821449  | 1.040175  | -0.557053 |
| C          | -0.487585 | 1.644681  | -0.299597 | C          | -0.424425 | 1.611349  | -0.412445 |
| C          | -1.497643 | 0.708971  | -0.537185 | C          | -1.394895 | 0.624076  | -0.597645 |
| C          | -2.934656 | 0.95978   | -0.545564 | C          | -2.836988 | 0.83286   | -0.579519 |
| C          | -3.907461 | 0.186166  | -0.011165 | C          | -3.783042 | 0.034196  | -0.033399 |
| C          | -5.333922 | 0.605581  | -0.148857 | C          | -5.22028  | 0.418227  | -0.15377  |
| N          | -6.25272  | -0.229852 | 0.424711  | N          | -6.111208 | -0.438311 | 0.435925  |
| C          | -6.028676 | -1.590949 | 0.908643  | C          | -5.848043 | -1.79917  | 0.899732  |
| C          | -4.565932 | -1.838503 | 1.270018  | C          | -4.377756 | -2.007323 | 1.254013  |
| N          | -3.648771 | -0.964967 | 0.757688  | N          | -3.488376 | -1.110973 | 0.733565  |
| C          | -0.548742 | 3.132812  | 0.046063  | C          | -0.580385 | 3.104847  | -0.13723  |
| C          | 0.772955  | 3.557097  | 0.675383  | C          | -1.579169 | 3.30711   | 0.996389  |
| C          | 1.663308  | 4.428719  | 0.193036  | C          | -2.655421 | 4.096796  | 0.997204  |
| C          | -1.643563 | 3.417206  | 1.108746  | C          | -1.002979 | 3.81473   | -1.446056 |
| C          | -0.863373 | 3.929002  | -1.242061 | C          | 0.761789  | 3.722557  | 0.335786  |
| C          | -6.513562 | -2.657275 | -0.09271  | C          | -6.303688 | -2.866009 | -0.115049 |
| C          | 3.019318  | -1.003388 | -1.144984 | C          | 3.188577  | -0.920509 | -1.115597 |
| C          | 3.665053  | -0.73701  | 0.233444  | C          | 3.804307  | -0.521178 | 0.245305  |
| C          | 5.187151  | -1.042871 | 0.268514  | C          | 5.330265  | -0.795039 | 0.333047  |
| C          | 5.495418  | -2.531442 | 0.135588  | C          | 5.662979  | -2.284203 | 0.349633  |
| C          | 5.991399  | -0.174551 | -0.71304  | C          | 6.136868  | -0.012077 | -0.716434 |
| O          | 7.389826  | -0.401676 | -0.666369 | O          | 7.537562  | -0.208343 | -0.626583 |
| H          | 3.188817  | -1.38197  | 0.984338  | H          | 3.324956  | -1.103969 | 1.043273  |
| Cl         | 5.755178  | -0.546952 | 1.99626   | Cl         | 5.861983  | -0.12555  | 2.012754  |

|                                    |           |           |           |                                    |           |           |           |
|------------------------------------|-----------|-----------|-----------|------------------------------------|-----------|-----------|-----------|
| O                                  | -4.242935 | -2.800053 | 1.959182  | O                                  | -4.024637 | -2.958133 | 1.944177  |
| O                                  | -5.668306 | 1.651548  | -0.705894 | O                                  | -5.590671 | 1.45074   | -0.712687 |
| H                                  | -0.686504 | -3.779342 | -1.873451 | H                                  | -0.392497 | -3.882658 | -1.735638 |
| H                                  | 1.731007  | -3.319435 | -1.739124 | H                                  | 2.003682  | -3.317596 | -1.609503 |
| H                                  | -2.351385 | -2.012934 | -1.37813  | H                                  | -2.132002 | -2.169552 | -1.324469 |
| H                                  | 1.627075  | 1.422702  | -0.201024 | H                                  | 1.702684  | 1.454636  | -0.274242 |
| H                                  | -3.306873 | 1.863242  | -1.020112 | H                                  | -3.236072 | 1.738808  | -1.022853 |
| H                                  | -7.213816 | 0.066937  | 0.291696  | H                                  | -7.080812 | -0.16891  | 0.306582  |
| H                                  | -6.583519 | -1.713964 | 1.845861  | H                                  | -6.396458 | -1.951193 | 1.836339  |
| H                                  | -2.681213 | -1.173458 | 0.988744  | H                                  | -2.515569 | -1.288523 | 0.96727   |
| H                                  | 0.971854  | 3.096543  | 1.64573   | H                                  | -1.335283 | 2.752426  | 1.904084  |
| H                                  | 2.561656  | 4.676045  | 0.753241  | H                                  | -3.281781 | 4.181756  | 1.881159  |
| H                                  | 1.537258  | 4.931924  | -0.761768 | H                                  | -2.973315 | 4.664579  | 0.127069  |
| H                                  | -2.642996 | 3.174686  | 0.740585  | H                                  | -0.257829 | 3.631342  | -2.227728 |
| H                                  | -1.626394 | 4.480224  | 1.374445  | H                                  | -1.073562 | 4.89791   | -1.292817 |
| H                                  | -1.468901 | 2.833412  | 2.019675  | H                                  | -1.969853 | 3.458606  | -1.813817 |
| H                                  | -0.104761 | 3.760303  | -2.013828 | H                                  | 1.125192  | 3.249953  | 1.256158  |
| H                                  | -0.912395 | 5.0032    | -1.02885  | H                                  | 0.614397  | 4.78644   | 0.545592  |
| H                                  | -1.830193 | 3.623045  | -1.653158 | H                                  | 1.540079  | 3.641591  | -0.432974 |
| H                                  | -7.58295  | -2.525827 | -0.294053 | H                                  | -7.376726 | -2.762672 | -0.313552 |
| H                                  | -5.973372 | -2.574323 | -1.042408 | H                                  | -5.767631 | -2.755359 | -1.064305 |
| H                                  | -6.356282 | -3.657603 | 0.321868  | H                                  | -6.117435 | -3.86698  | 0.286041  |
| H                                  | 3.502194  | -1.865255 | -1.613602 | H                                  | 3.715616  | -1.791584 | -1.514049 |
| H                                  | 3.235816  | -0.134735 | -1.78214  | H                                  | 3.376608  | -0.093015 | -1.813817 |
| O                                  | 3.397849  | 0.635409  | 0.542237  | O                                  | 3.51007   | 0.870404  | 0.429102  |
| H                                  | 6.559001  | -2.715562 | 0.29933   | H                                  | 6.727468  | -2.433284 | 0.541062  |
| H                                  | 5.253511  | -2.877168 | -0.875849 | H                                  | 5.437874  | -2.731084 | -0.625082 |
| H                                  | 4.916574  | -3.1197   | 0.854325  | H                                  | 5.085405  | -2.809081 | 1.116757  |
| H                                  | 5.748526  | 0.88272   | -0.55607  | H                                  | 5.874457  | 1.051115  | -0.667153 |
| H                                  | 5.687414  | -0.446446 | -1.729619 | H                                  | 5.85467   | -0.387188 | -1.706082 |
| H                                  | 7.722032  | -0.090802 | 0.191998  | H                                  | 7.850859  | 0.19217   | 0.201179  |
| H                                  | 3.740276  | 0.820846  | 1.433427  | H                                  | 3.847279  | 1.139569  | 1.301163  |
| Free Energy = -1857.584099 Hartree |           |           |           | Free Energy = -1857.584041 Hartree |           |           |           |

| conf. 4c-5 | X axis(Å) | Y axis(Å) | Z axis(Å) | conf. 4c-6 | X axis(Å) | Y axis(Å) | Z axis(Å) |
|------------|-----------|-----------|-----------|------------|-----------|-----------|-----------|
| C          | 0.043433  | -3.051008 | -0.814423 | C          | 0.14999   | -3.014732 | -0.657249 |
| C          | -1.268269 | -2.807532 | -0.359685 | C          | -1.164413 | -2.755635 | -0.218919 |
| C          | -1.686727 | -1.542609 | 0.059008  | C          | -1.590126 | -1.47669  | 0.146667  |
| C          | -0.715743 | -0.525803 | 0.001932  | C          | -0.622121 | -0.457813 | 0.052567  |
| C          | 0.626924  | -0.750923 | -0.403508 | C          | 0.720499  | -0.69709  | -0.346284 |
| C          | 0.995344  | -2.038567 | -0.839679 | C          | 1.096533  | -2.000041 | -0.72615  |
| N          | -0.832689 | 0.815559  | 0.30179   | N          | -0.738149 | 0.896377  | 0.293613  |



|    |           |           |           |    |           |           |           |
|----|-----------|-----------|-----------|----|-----------|-----------|-----------|
| C  | 0.361531  | 1.465337  | 0.080815  | C  | 0.45776   | 1.535551  | 0.052906  |
| C  | 1.312703  | 0.526023  | -0.327333 | C  | 1.405361  | 0.582267  | -0.329947 |
| C  | 2.701787  | 0.811335  | -0.65975  | C  | 2.785204  | 0.838012  | -0.725808 |
| C  | 3.79674   | 0.069538  | -0.371764 | C  | 3.885979  | 0.122046  | -0.398816 |
| C  | 5.135631  | 0.534681  | -0.838376 | C  | 5.215475  | 0.539218  | -0.934754 |
| N  | 6.186399  | -0.279257 | -0.505643 | N  | 6.269793  | -0.250493 | -0.562591 |
| C  | 6.102264  | -1.674779 | -0.075106 | C  | 6.192443  | -1.600654 | -0.004371 |
| C  | 4.799885  | -1.948216 | 0.681499  | C  | 4.907301  | -1.799715 | 0.803715  |
| N  | 3.769608  | -1.084392 | 0.436351  | N  | 3.874162  | -0.953711 | 0.509657  |
| C  | 0.490582  | 2.973681  | 0.285329  | C  | 0.550383  | 3.055305  | 0.192481  |
| C  | 1.687542  | 3.251434  | 1.188975  | C  | -0.588506 | 3.548982  | 1.076741  |
| C  | 2.717162  | 4.064752  | 0.943335  | C  | -1.58676  | 4.369313  | 0.737276  |
| C  | -0.756067 | 3.541173  | 1.013693  | C  | 0.512428  | 3.690701  | -1.217402 |
| C  | 0.600621  | 3.671371  | -1.090777 | C  | 1.86223   | 3.472599  | 0.910893  |
| C  | 7.322707  | -2.05035  | 0.767594  | C  | 7.431662  | -1.903765 | 0.840027  |
| C  | -3.092622 | -1.329367 | 0.587076  | C  | -3.008245 | -1.250333 | 0.636364  |
| C  | -4.003959 | -0.437462 | -0.287377 | C  | -3.83154  | -0.228085 | -0.188083 |
| C  | -5.516627 | -0.729933 | -0.094862 | C  | -5.349996 | -0.510345 | -0.318246 |
| C  | -5.927968 | -2.095682 | -0.63723  | C  | -6.067212 | 0.607627  | -1.072931 |
| C  | -5.990161 | -0.491158 | 1.348515  | C  | -5.63908  | -1.883646 | -0.958202 |
| O  | -7.378035 | -0.704938 | 1.539215  | O  | -7.017171 | -2.138085 | -1.160786 |
| H  | -3.772463 | -0.614026 | -1.346331 | H  | -3.450803 | -0.205994 | -1.216611 |
| Cl | -6.410504 | 0.543146  | -1.160298 | Cl | -6.063828 | -0.560495 | 1.415371  |
| O  | 4.677192  | -2.915554 | 1.425106  | O  | 4.798627  | -2.698902 | 1.629607  |
| O  | 5.303593  | 1.593033  | -1.444123 | O  | 5.370567  | 1.54643   | -1.625381 |
| H  | 0.31352   | -4.05153  | -1.141287 | H  | 0.423862  | -4.027237 | -0.94136  |
| H  | -1.976187 | -3.633244 | -0.326504 | H  | -1.871244 | -3.580664 | -0.159053 |
| H  | 1.999545  | -2.239843 | -1.199205 | H  | 2.102014  | -2.21021  | -1.07715  |
| H  | -1.731952 | 1.255259  | 0.462301  | H  | -1.627311 | 1.360615  | 0.464648  |
| H  | 2.931495  | 1.736449  | -1.177139 | H  | 2.997664  | 1.700298  | -1.35122  |
| H  | 7.077721  | 0.037324  | -0.873044 | H  | 7.155404  | 0.032353  | -0.969264 |
| H  | 6.072364  | -2.336522 | -0.95869  | H  | 6.140214  | -2.339439 | -0.823275 |
| H  | 2.902126  | -1.307839 | 0.915746  | H  | 3.013169  | -1.136304 | 1.017765  |
| H  | 1.646846  | 2.73049   | 2.147049  | H  | -0.535156 | 3.195115  | 2.108463  |
| H  | 3.504474  | 4.202817  | 1.679618  | H  | -2.325821 | 4.681364  | 1.471106  |
| H  | 2.836876  | 4.601643  | 0.00635   | H  | -1.709669 | 4.763987  | -0.267533 |
| H  | -1.66825  | 3.416953  | 0.416431  | H  | 1.354862  | 3.337644  | -1.819943 |
| H  | -0.617717 | 4.613856  | 1.180869  | H  | 0.581575  | 4.782656  | -1.149824 |
| H  | -0.910364 | 3.067135  | 1.989697  | H  | -0.409509 | 3.432837  | -1.75003  |
| H  | 1.483987  | 3.350254  | -1.64968  | H  | 1.934015  | 3.006698  | 1.900192  |
| H  | 0.652993  | 4.759129  | -0.966132 | H  | 1.874073  | 4.560358  | 1.043251  |
| H  | -0.281722 | 3.44235   | -1.698519 | H  | 2.74951   | 3.189481  | 0.340211  |
| H  | 8.241035  | -1.924647 | 0.181732  | H  | 8.336325  | -1.832061 | 0.224614  |

|                                    |           |           |           |                                    |           |           |           |
|------------------------------------|-----------|-----------|-----------|------------------------------------|-----------|-----------|-----------|
| H                                  | 7.385736  | -1.417261 | 1.658758  | H                                  | 7.515652  | -1.196081 | 1.671367  |
| H                                  | 7.248512  | -3.093145 | 1.083824  | H                                  | 7.364158  | -2.914919 | 1.247322  |
| H                                  | -3.550595 | -2.315485 | 0.701832  | H                                  | -3.511369 | -2.220739 | 0.655812  |
| H                                  | -3.059005 | -0.879196 | 1.588868  | H                                  | -3.001954 | -0.901103 | 1.678266  |
| O                                  | -3.687164 | 0.920098  | 0.049623  | O                                  | -3.606527 | 1.102764  | 0.298084  |
| H                                  | -7.013312 | -2.208154 | -0.599979 | H                                  | -7.132859 | 0.387266  | -1.157955 |
| H                                  | -5.493415 | -2.8915   | -0.02194  | H                                  | -5.650333 | 0.674033  | -2.086435 |
| H                                  | -5.590673 | -2.228623 | -1.669857 | H                                  | -5.928113 | 1.573285  | -0.584948 |
| H                                  | -5.687355 | 0.509723  | 1.677529  | H                                  | -5.180437 | -2.689207 | -0.374246 |
| H                                  | -5.492565 | -1.22577  | 1.990734  | H                                  | -5.186857 | -1.887701 | -1.95683  |
| H                                  | -7.863615 | -0.014984 | 1.057618  | H                                  | -7.44236  | -2.231551 | -0.29206  |
| H                                  | -4.217672 | 1.504814  | -0.519044 | H                                  | -4.049733 | 1.1823    | 1.161601  |
| Free Energy = -1857.582862 Hartree |           |           |           | Free Energy = -1857.581969 Hartree |           |           |           |

**Table S27.** The Cartesian coordinates of the lowest energy conformers (Conf. 1-6) for isomer **4d**.

| conf. 4d-1 | X axis(Å) | Y axis(Å) | Z axis(Å) | conf. 4d-2 | X axis(Å) | Y axis(Å) | Z axis(Å) |
|------------|-----------|-----------|-----------|------------|-----------|-----------|-----------|
| C          | -0.218399 | -2.701511 | -1.624166 | C          | -0.359334 | -2.745101 | -1.728915 |
| C          | 1.153772  | -2.400246 | -1.507694 | C          | 1.0217    | -2.491166 | -1.602852 |
| C          | 1.609332  | -1.143896 | -1.101307 | C          | 1.518432  | -1.246006 | -1.210894 |
| C          | 0.610378  | -0.202865 | -0.785373 | C          | 0.552584  | -0.264612 | -0.917535 |
| C          | -0.779603 | -0.486119 | -0.870022 | C          | -0.844612 | -0.494772 | -1.029997 |
| C          | -1.189901 | -1.755058 | -1.322434 | C          | -1.297794 | -1.7556   | -1.462283 |
| N          | 0.731975  | 1.117705  | -0.403893 | N          | 0.715469  | 1.055009  | -0.557987 |
| C          | -0.508575 | 1.689082  | -0.230747 | C          | -0.507295 | 1.680612  | -0.42828  |
| C          | -1.485472 | 0.729456  | -0.50941  | C          | -1.512815 | 0.753641  | -0.710764 |
| C          | -2.929655 | 0.934479  | -0.518409 | C          | -2.959389 | 0.967501  | -0.717523 |
| C          | -3.880199 | 0.113887  | -0.014682 | C          | -3.890714 | 0.188294  | -0.121848 |
| C          | -5.318247 | 0.493913  | -0.145164 | C          | -5.335832 | 0.5381    | -0.260106 |
| N          | -6.213314 | -0.386989 | 0.396965  | N          | -6.211315 | -0.283026 | 0.393409  |
| C          | -5.950303 | -1.753498 | 0.844387  | C          | -5.931356 | -1.539027 | 1.086062  |
| C          | -4.481067 | -1.969483 | 1.199389  | C          | -4.439465 | -1.75666  | 1.328627  |
| N          | -3.589351 | -1.053859 | 0.716572  | N          | -3.571965 | -0.913942 | 0.693798  |
| C          | -0.624091 | 3.162624  | 0.160949  | C          | -0.53341  | 3.118184  | 0.089668  |
| C          | 0.693677  | 3.626381  | 0.769873  | C          | 0.671793  | 3.853781  | -0.486209 |
| C          | 1.515362  | 4.57399   | 0.309158  | C          | 1.675662  | 4.422552  | 0.187778  |
| C          | -1.702905 | 3.362684  | 1.259639  | C          | -0.521593 | 3.085381  | 1.637158  |
| C          | -1.007871 | 3.984636  | -1.091393 | C          | -1.790573 | 3.891039  | -0.378945 |
| C          | -6.405116 | -2.80576  | -0.185505 | C          | -6.529979 | -2.749816 | 0.346597  |
| C          | 3.095275  | -0.836777 | -1.074895 | C          | 3.011891  | -0.983974 | -1.186957 |
| C          | 3.644398  | -0.352518 | 0.290588  | C          | 3.616112  | -0.7296   | 0.212608  |
| C          | 5.100372  | -0.760065 | 0.632766  | C          | 5.13326   | -1.050794 | 0.294443  |

|                                   |           |           |           |                                   |           |           |           |
|-----------------------------------|-----------|-----------|-----------|-----------------------------------|-----------|-----------|-----------|
| C                                 | 5.552181  | -0.163031 | 1.964605  | C                                 | 5.430777  | -2.5418   | 0.163446  |
| C                                 | 5.304689  | -2.288931 | 0.614519  | C                                 | 5.976947  | -0.185649 | -0.656374 |
| O                                 | 6.604549  | -2.693319 | 1.003504  | O                                 | 7.370839  | -0.427807 | -0.567221 |
| H                                 | 3.027757  | -0.771605 | 1.095112  | H                                 | 3.110274  | -1.372964 | 0.945287  |
| Cl                                | 6.21047   | -0.051107 | -0.702081 | Cl                                | 5.650781  | -0.569374 | 2.041789  |
| O                                 | -4.130474 | -2.942596 | 1.85824   | O                                 | -4.053385 | -2.668938 | 2.051756  |
| O                                 | -5.682603 | 1.546452  | -0.670116 | O                                 | -5.722981 | 1.51666   | -0.899169 |
| H                                 | -0.516212 | -3.689516 | -1.964919 | H                                 | -0.689251 | -3.727608 | -2.055642 |
| H                                 | 1.883461  | -3.164667 | -1.766542 | H                                 | 1.725726  | -3.284776 | -1.844836 |
| H                                 | -2.242714 | -1.990635 | -1.443376 | H                                 | -2.357829 | -1.950501 | -1.595592 |
| H                                 | 1.616766  | 1.539287  | -0.133278 | H                                 | 1.60378   | 1.444489  | -0.259518 |
| H                                 | -3.328264 | 1.841971  | -0.962785 | H                                 | -3.370461 | 1.819183  | -1.248523 |
| H                                 | -7.182429 | -0.1148   | 0.269819  | H                                 | -7.184512 | -0.025388 | 0.267557  |
| H                                 | -6.501089 | -1.917724 | 1.777767  | H                                 | -6.379946 | -1.488768 | 2.086622  |
| H                                 | -2.616455 | -1.241425 | 0.943009  | H                                 | -2.588469 | -1.106457 | 0.863934  |
| H                                 | 0.955429  | 3.125757  | 1.704377  | H                                 | 0.67186   | 3.918751  | -1.575826 |
| H                                 | 2.416237  | 4.842122  | 0.855693  | H                                 | 2.472568  | 4.945118  | -0.335328 |
| H                                 | 1.326883  | 5.122155  | -0.610009 | H                                 | 1.743968  | 4.400386  | 1.27222   |
| H                                 | -2.697266 | 3.074451  | 0.910439  | H                                 | -1.407888 | 2.558021  | 2.004082  |
| H                                 | -1.735137 | 4.418468  | 1.55142   | H                                 | -0.537084 | 4.102569  | 2.045924  |
| H                                 | -1.472197 | 2.7678    | 2.150663  | H                                 | 0.362189  | 2.569132  | 2.028044  |
| H                                 | -0.261565 | 3.877746  | -1.886009 | H                                 | -1.89357  | 3.87192   | -1.469668 |
| H                                 | -1.100718 | 5.047755  | -0.840616 | H                                 | -1.705081 | 4.937214  | -0.065566 |
| H                                 | -1.969805 | 3.649742  | -1.490624 | H                                 | -2.704017 | 3.483448  | 0.06211   |
| H                                 | -7.477463 | -2.698003 | -0.385173 | H                                 | -7.614593 | -2.629249 | 0.243175  |
| H                                 | -5.866276 | -2.683322 | -1.13169  | H                                 | -6.097922 | -2.846745 | -0.65552  |
| H                                 | -6.221168 | -3.811971 | 0.202987  | H                                 | -6.331808 | -3.665113 | 0.911571  |
| H                                 | 3.624836  | -1.73536  | -1.402584 | H                                 | 3.503699  | -1.845903 | -1.64602  |
| H                                 | 3.338849  | -0.064552 | -1.81808  | H                                 | 3.253667  | -0.112604 | -1.811194 |
| O                                 | 3.477157  | 1.067     | 0.422419  | O                                 | 3.352782  | 0.644284  | 0.518866  |
| H                                 | 6.576479  | -0.465478 | 2.189856  | H                                 | 6.486629  | -2.737702 | 0.360246  |
| H                                 | 4.900524  | -0.544245 | 2.761742  | H                                 | 5.218073  | -2.879905 | -0.857042 |
| H                                 | 5.482098  | 0.925604  | 1.960225  | H                                 | 4.823281  | -3.127813 | 0.860033  |
| H                                 | 5.050449  | -2.703162 | -0.367248 | H                                 | 5.740244  | 0.873229  | -0.500837 |
| H                                 | 4.623986  | -2.725879 | 1.354567  | H                                 | 5.702457  | -0.448552 | -1.683669 |
| H                                 | 7.23196   | -2.406645 | 0.319222  | H                                 | 7.679635  | -0.1237   | 0.302228  |
| H                                 | 4.112668  | 1.498405  | -0.176501 | H                                 | 3.66775   | 0.822708  | 1.421546  |
| Free Energy = -1857.58508 Hartree |           |           |           | Free Energy = -1857.584007Hartree |           |           |           |

| conf. 4d-3 | X axis(Å) | Y axis(Å) | Z axis(Å) | conf. 4d-4 | X axis(Å) | Y axis(Å) | Z axis(Å) |
|------------|-----------|-----------|-----------|------------|-----------|-----------|-----------|
| C          | 0.14999   | -3.014732 | -0.657249 | C          | -0.085568 | -3.028064 | -0.67722  |
| C          | -1.164413 | -2.755635 | -0.218919 | C          | -1.388367 | -2.726488 | -0.231023 |

|    |           |           |           |    |           |           |           |
|----|-----------|-----------|-----------|----|-----------|-----------|-----------|
| C  | -1.590126 | -1.47669  | 0.146667  | C  | -1.767148 | -1.434917 | 0.14145   |
| C  | -0.622121 | -0.457813 | 0.052567  | C  | -0.76391  | -0.451388 | 0.046717  |
| C  | 0.720499  | -0.69709  | -0.346284 | C  | 0.567736  | -0.732186 | -0.361291 |
| C  | 1.096533  | -2.000041 | -0.72615  | C  | 0.895255  | -2.046392 | -0.748444 |
| N  | -0.738149 | 0.896377  | 0.293613  | N  | -0.838629 | 0.905879  | 0.287426  |
| C  | 0.45776   | 1.535551  | 0.052906  | C  | 0.373176  | 1.508866  | 0.034251  |
| C  | 1.405361  | 0.582267  | -0.329947 | C  | 1.291117  | 0.525729  | -0.345496 |
| C  | 2.785204  | 0.838012  | -0.725808 | C  | 2.682741  | 0.755737  | -0.709369 |
| C  | 3.885979  | 0.122046  | -0.398816 | C  | 3.759655  | -0.004794 | -0.402846 |
| C  | 5.215475  | 0.539218  | -0.934754 | C  | 5.104989  | 0.398471  | -0.906698 |
| N  | 6.269793  | -0.250493 | -0.562591 | N  | 6.136333  | -0.42936  | -0.547973 |
| C  | 6.192443  | -1.600654 | -0.004371 | C  | 6.017992  | -1.800742 | -0.052706 |
| C  | 4.907301  | -1.799715 | 0.803715  | C  | 4.717865  | -2.001381 | 0.730098  |
| N  | 3.874162  | -0.953711 | 0.509657  | N  | 3.709897  | -1.119617 | 0.457598  |
| C  | 0.550383  | 3.055305  | 0.192481  | C  | 0.548716  | 3.019592  | 0.175907  |
| C  | -0.588506 | 3.548982  | 1.076741  | C  | 1.777753  | 3.299648  | 1.034363  |
| C  | -1.58676  | 4.369313  | 0.737276  | C  | 2.814921  | 4.084409  | 0.733615  |
| C  | 0.512428  | 3.690701  | -1.217402 | C  | -0.662055 | 3.649111  | 0.914268  |
| C  | 1.86223   | 3.472599  | 0.910893  | C  | 0.638806  | 3.658459  | -1.230047 |
| C  | 7.431662  | -1.903765 | 0.840027  | C  | 7.237543  | -2.172706 | 0.792901  |
| C  | -3.008245 | -1.250333 | 0.636364  | C  | -3.172982 | -1.159034 | 0.642978  |
| C  | -3.83154  | -0.228085 | -0.188083 | C  | -3.946738 | -0.056816 | -0.124791 |
| C  | -5.349996 | -0.510345 | -0.318246 | C  | -5.475149 | -0.264237 | -0.273613 |
| C  | -6.067212 | 0.607627  | -1.072931 | C  | -6.13915  | 0.922041  | -0.97065  |
| C  | -5.63908  | -1.883646 | -0.958202 | C  | -5.821617 | -1.588104 | -0.986069 |
| O  | -7.017171 | -2.138085 | -1.160786 | O  | -7.208161 | -1.766205 | -1.209743 |
| H  | -3.450803 | -0.205994 | -1.216611 | H  | -3.559992 | 0.009634  | -1.148982 |
| Cl | -6.063828 | -0.560495 | 1.415371  | Cl | -6.197469 | -0.373761 | 1.453133  |
| O  | 4.798627  | -2.698902 | 1.629607  | O  | 4.576709  | -2.930067 | 1.51838   |
| O  | 5.370567  | 1.54643   | -1.625381 | O  | 5.295511  | 1.421814  | -1.563655 |
| H  | 0.423862  | -4.027237 | -0.94136  | H  | 0.151643  | -4.047866 | -0.968026 |
| H  | -1.871244 | -3.580664 | -0.159053 | H  | -2.123136 | -3.526779 | -0.172196 |
| H  | 2.102014  | -2.21021  | -1.07715  | H  | 1.889756  | -2.290308 | -1.108464 |
| H  | -1.627311 | 1.360615  | 0.464648  | H  | -1.713019 | 1.376722  | 0.501206  |
| H  | 2.997664  | 1.700298  | -1.35122  | H  | 2.930527  | 1.649983  | -1.271038 |
| H  | 7.155404  | 0.032353  | -0.969264 | H  | 7.031447  | -0.156264 | -0.940235 |
| H  | 6.140214  | -2.339439 | -0.823275 | H  | 5.958468  | -2.501144 | -0.904404 |
| H  | 3.013169  | -1.136304 | 1.017765  | H  | 2.84231   | -1.296377 | 0.955988  |
| H  | -0.535156 | 3.195115  | 2.108463  | H  | 1.75513   | 2.810431  | 2.009639  |
| H  | -2.325821 | 4.681364  | 1.471106  | H  | 3.626089  | 4.229653  | 1.442068  |
| H  | -1.709669 | 4.763987  | -0.267533 | H  | 2.917044  | 4.588984  | -0.223215 |
| H  | 1.354862  | 3.337644  | -1.819943 | H  | -1.59506  | 3.52011   | 0.351966  |
| H  | 0.581575  | 4.782656  | -1.149824 | H  | -0.492815 | 4.724194  | 1.029692  |

|                                    |           |           |           |                                    |           |           |           |
|------------------------------------|-----------|-----------|-----------|------------------------------------|-----------|-----------|-----------|
| H                                  | -0.409509 | 3.432837  | -1.75003  | H                                  | -0.793592 | 3.222625  | 1.915627  |
| H                                  | 1.934015  | 3.006698  | 1.900192  | H                                  | 1.496723  | 3.288092  | -1.798245 |
| H                                  | 1.874073  | 4.560358  | 1.043251  | H                                  | 0.726133  | 4.748241  | -1.151376 |
| H                                  | 2.74951   | 3.189481  | 0.340211  | H                                  | -0.266957 | 3.432567  | -1.803382 |
| H                                  | 8.336325  | -1.832061 | 0.224614  | H                                  | 8.152149  | -2.096711 | 0.192824  |
| H                                  | 7.515652  | -1.196081 | 1.671367  | H                                  | 7.327398  | -1.504357 | 1.655559  |
| H                                  | 7.364158  | -2.914919 | 1.247322  | H                                  | 7.139445  | -3.198732 | 1.154236  |
| H                                  | -3.511369 | -2.220739 | 0.655812  | H                                  | -3.725297 | -2.101891 | 0.61557   |
| H                                  | -3.001954 | -0.901103 | 1.678266  | H                                  | -3.1492   | -0.864238 | 1.701495  |
| O                                  | -3.606527 | 1.102764  | 0.298084  | O                                  | -3.669818 | 1.23645   | 0.43864   |
| H                                  | -7.132859 | 0.387266  | -1.157955 | H                                  | -7.212604 | 0.751982  | -1.071288 |
| H                                  | -5.650333 | 0.674033  | -2.086435 | H                                  | -5.714133 | 1.023946  | -1.977839 |
| H                                  | -5.928113 | 1.573285  | -0.584948 | H                                  | -5.962757 | 1.85372   | -0.431392 |
| H                                  | -5.180437 | -2.689207 | -0.374246 | H                                  | -5.40627  | -2.443278 | -0.441742 |
| H                                  | -5.186857 | -1.887701 | -1.95683  | H                                  | -5.361456 | -1.562404 | -1.980718 |
| H                                  | -7.44236  | -2.231551 | -0.29206  | H                                  | -7.644188 | -1.890259 | -0.350301 |
| H                                  | -4.049733 | 1.1823    | 1.161601  | H                                  | -4.107441 | 1.28053   | 1.307678  |
| Free Energy = -1857.583475 Hartree |           |           |           | Free Energy = -1857.583446 Hartree |           |           |           |

| conf. 4d-5 | X axis(Å) | Y axis(Å) | Z axis(Å) | conf. 4d-6 | X axis(Å) | Y axis(Å) | Z axis(Å) |
|------------|-----------|-----------|-----------|------------|-----------|-----------|-----------|
| C          | -0.35308  | -2.792253 | -1.564526 | C          | -0.116548 | -2.767604 | -1.621877 |
| C          | 1.028903  | -2.528673 | -1.482841 | C          | 1.253047  | -2.447034 | -1.535044 |
| C          | 1.527662  | -1.2755   | -1.119365 | C          | 1.696743  | -1.184315 | -1.135227 |
| C          | 0.564249  | -0.297191 | -0.81033  | C          | 0.69219   | -0.260324 | -0.794777 |
| C          | -0.834785 | -0.539278 | -0.867903 | C          | -0.695299 | -0.560102 | -0.854279 |
| C          | -1.290297 | -1.80728  | -1.27672  | C          | -1.095314 | -1.834225 | -1.301499 |
| N          | 0.732382  | 1.029956  | -0.474866 | N          | 0.80975   | 1.064046  | -0.423922 |
| C          | -0.487585 | 1.644681  | -0.299597 | C          | -0.434935 | 1.621215  | -0.228645 |
| C          | -1.497643 | 0.708971  | -0.537185 | C          | -1.406556 | 0.649452  | -0.484334 |
| C          | -2.934656 | 0.95978   | -0.545564 | C          | -2.847112 | 0.859485  | -0.438299 |
| C          | -3.907461 | 0.186166  | -0.011165 | C          | -3.78914  | 0.026233  | 0.062699  |
| C          | -5.333922 | 0.605581  | -0.148857 | C          | -5.22693  | 0.422538  | -0.001382 |
| N          | -6.25272  | -0.229852 | 0.424711  | N          | -6.11175  | -0.482436 | 0.520935  |
| C          | -6.028676 | -1.590949 | 0.908643  | C          | -5.844258 | -1.878167 | 0.862566  |
| C          | -4.565932 | -1.838503 | 1.270018  | C          | -4.371261 | -2.11287  | 1.187783  |
| N          | -3.648771 | -0.964967 | 0.757688  | N          | -3.487182 | -1.17386  | 0.737823  |
| C          | -0.548742 | 3.132812  | 0.046063  | C          | -0.597051 | 3.080831  | 0.192563  |
| C          | 0.772955  | 3.557097  | 0.675383  | C          | -1.273165 | 3.820173  | -0.959572 |
| C          | 1.663308  | 4.428719  | 0.193036  | C          | -2.426551 | 4.49325   | -0.926762 |
| C          | -1.643563 | 3.417206  | 1.108746  | C          | 0.780526  | 3.752219  | 0.419287  |
| C          | -0.863373 | 3.929002  | -1.242061 | C          | -1.395624 | 3.166517  | 1.511876  |
| C          | -6.513562 | -2.657275 | -0.09271  | C          | -6.305595 | -2.854227 | -0.237495 |

|                                    |           |           |           |                                    |           |           |           |
|------------------------------------|-----------|-----------|-----------|------------------------------------|-----------|-----------|-----------|
| C                                  | 3.019318  | -1.003388 | -1.144984 | C                                  | 3.174175  | -0.842393 | -1.156059 |
| C                                  | 3.665053  | -0.73701  | 0.233444  | C                                  | 3.807891  | -0.552268 | 0.223799  |
| C                                  | 5.187151  | -1.042871 | 0.268514  | C                                  | 5.337499  | -0.816161 | 0.26458   |
| C                                  | 5.495418  | -2.531442 | 0.135588  | C                                  | 5.685065  | -2.29683  | 0.14007   |
| C                                  | 5.991399  | -0.174551 | -0.71304  | C                                  | 6.120838  | 0.068265  | -0.719901 |
| O                                  | 7.389826  | -0.401676 | -0.666369 | O                                  | 7.524165  | -0.123559 | -0.670504 |
| H                                  | 3.188817  | -1.38197  | 0.984338  | H                                  | 3.346614  | -1.205197 | 0.976804  |
| Cl                                 | 5.755178  | -0.546952 | 1.99626   | Cl                                 | 5.887747  | -0.296357 | 1.990625  |
| O                                  | -4.242935 | -2.800053 | 1.959182  | O                                  | -4.011708 | -3.117587 | 1.792873  |
| O                                  | -5.668306 | 1.651548  | -0.705894 | O                                  | -5.601551 | 1.504008  | -0.455013 |
| H                                  | -0.686504 | -3.779342 | -1.873451 | H                                  | -0.407845 | -3.75841  | -1.960006 |
| H                                  | 1.731007  | -3.319435 | -1.739124 | H                                  | 1.988242  | -3.198334 | -1.816103 |
| H                                  | -2.351385 | -2.012934 | -1.37813  | H                                  | -2.146306 | -2.083985 | -1.407502 |
| H                                  | 1.627075  | 1.422702  | -0.201024 | H                                  | 1.693217  | 1.4604    | -0.123102 |
| H                                  | -3.306873 | 1.863242  | -1.020112 | H                                  | -3.237821 | 1.799002  | -0.818861 |
| H                                  | -7.213816 | 0.066937  | 0.291696  | H                                  | -7.082362 | -0.200194 | 0.433459  |
| H                                  | -6.583519 | -1.713964 | 1.845861  | H                                  | -6.386098 | -2.111312 | 1.786169  |
| H                                  | -2.681213 | -1.173458 | 0.988744  | H                                  | -2.511652 | -1.370918 | 0.942978  |
| H                                  | 0.971854  | 3.096543  | 1.64573   | H                                  | -0.716852 | 3.776239  | -1.897652 |
| H                                  | 2.561656  | 4.676045  | 0.753241  | H                                  | -2.806131 | 4.990233  | -1.815737 |
| H                                  | 1.537258  | 4.931924  | -0.761768 | H                                  | -3.042741 | 4.565748  | -0.034846 |
| H                                  | -2.642996 | 3.174686  | 0.740585  | H                                  | 1.339573  | 3.260932  | 1.225768  |
| H                                  | -1.626394 | 4.480224  | 1.374445  | H                                  | 0.628276  | 4.796592  | 0.709233  |
| H                                  | -1.468901 | 2.833412  | 2.019675  | H                                  | 1.396404  | 3.749238  | -0.487599 |
| H                                  | -0.104761 | 3.760303  | -2.013828 | H                                  | -2.393315 | 2.729532  | 1.419147  |
| H                                  | -0.912395 | 5.0032    | -1.02885  | H                                  | -1.504414 | 4.211406  | 1.824819  |
| H                                  | -1.830193 | 3.623045  | -1.653158 | H                                  | -0.865916 | 2.627764  | 2.305489  |
| H                                  | -7.58295  | -2.525827 | -0.294053 | H                                  | -7.379551 | -2.734082 | -0.420811 |
| H                                  | -5.973372 | -2.574323 | -1.042408 | H                                  | -5.774403 | -2.663297 | -1.176691 |
| H                                  | -6.356282 | -3.657603 | 0.321868  | H                                  | -6.117792 | -3.885837 | 0.075645  |
| H                                  | 3.502194  | -1.865255 | -1.613602 | H                                  | 3.696789  | -1.678266 | -1.628866 |
| H                                  | 3.235816  | -0.134735 | -1.78214  | H                                  | 3.351367  | 0.038207  | -1.789155 |
| O                                  | 3.397849  | 0.635409  | 0.542237  | O                                  | 3.504383  | 0.815625  | 0.529768  |
| H                                  | 6.559001  | -2.715562 | 0.29933   | H                                  | 6.752845  | -2.451659 | 0.306555  |
| H                                  | 5.253511  | -2.877168 | -0.875849 | H                                  | 5.454353  | -2.654106 | -0.869804 |
| H                                  | 4.916574  | -3.1197   | 0.854325  | H                                  | 5.120731  | -2.896326 | 0.860978  |
| H                                  | 5.748526  | 0.88272   | -0.55607  | H                                  | 5.851693  | 1.119891  | -0.567555 |
| H                                  | 5.687414  | -0.446446 | -1.729619 | H                                  | 5.824986  | -0.215157 | -1.735707 |
| H                                  | 7.722032  | -0.090802 | 0.191998  | H                                  | 7.848514  | 0.203042  | 0.185011  |
| H                                  | 3.740276  | 0.820846  | 1.433427  | H                                  | 3.854046  | 1.012823  | 1.416059  |
| Free Energy = -1857.583418 Hartree |           |           |           | Free Energy = -1857.582565 Hartree |           |           |           |
